# Supplementary material for: Unraveling Rare Codon Bias in Actinomycetota: Lineage-Specific and 5’ Terminal Enrichment Across 1936 Genomes
Source: Research Square preprint supplement (doi:10.21203/rs.3.rs-7996976/v1), 2025-11-19
Supplement: Supplementary file 2 [file c86d17b99b106addbc4ecbed.xlsx]

## Sheet: Table S1 Genomes Metadata
Strain_ID	Organism_NCBI	Genus_NCBI	Species_NCBI	ANI_Check_Status	Assembly_Level	CheckM_Completeness	CheckM_Contamination	Genome_size (bp)	contig_N50	gc_Percent	Number_of_Contigs	Assigned_Quality	BioProject_Accession	BioSample_Accession
GCF_000009765.2	Streptomyces avermitilis MA-4680 = NBRC 14893	Streptomyces	avermitilis	OK	Complete Genome	99.91	1.17	9119895	9025608	70.5	2	HQ	PRJNA189	SAMD00061088
GCF_000009805.1	Nocardia farcinica IFM 10152	Nocardia	farcinica	OK	Complete Genome	99.33	0.63	6292344	6021225	70.5	3	HQ	PRJNA13117	SAMD00061069
GCF_000010105.1	Rhodococcus erythropolis PR4	Rhodococcus	erythropolis	OK	Complete Genome	98.7	0.13	6895538	6516310	62.5	4	HQ	PRJDA20395	SAMD00060932
GCF_000010605.1	Streptomyces griseus subsp. griseus NBRC 13350	Streptomyces	griseus	OK	Complete Genome	99.91	0	8545929	8545929	72	1	HQ	PRJDA20085	SAMD00060929
GCF_000024345.1	Kribbella flavida DSM 17836	Kribbella	flavida	OK	Complete Genome	99.16	3.78	7579488	7579488	70.5	1	HQ	PRJNA21089	SAMN02598447
GCF_000091305.1	Streptomyces scabiei 87.22	Streptomyces	scabiei	OK	Complete Genome	100	0.76	10148695	10148695	71.5	1	HQ	PRJEA40749	SAMEA2272773
GCF_000145235.1	Micromonospora aurantiaca ATCC 27029	Micromonospora	aurantiaca	OK	Complete Genome	99.3	0.96	7025559	7025559	73	1	HQ	PRJNA37957	SAMN00006196
GCF_000177195.2	Streptomyces sp. SirexAA-E	Streptomyces	sp.	OK	Complete Genome	99.43	0	7414440	7414440	71.5	1	HQ	PRJNA38225	SAMN02232054
GCF_000177655.2	Micromonospora sp. L5	Micromonospora	sp.	OK	Complete Genome	99.22	0.67	6962533	6962533	73	1	HQ	PRJNA38291	SAMN00008473
GCF_000213055.1	Streptomyces sp. Tu6071	Streptomyces	sp.	OK	Chromosome	99.34	0.09	7506727	5289936	73	3	HQ	PRJNA63579	SAMN02470040
GCF_000220705.2	Streptomyces xinghaiensis S187	Streptomyces	xinghaiensis	OK	Complete Genome	98.39	0.88	7137891	7137891	73	1	HQ	PRJNA67543	SAMN02469701
GCF_000261345.2	Streptomyces globisporus C-1027	Streptomyces	globisporus	OK	Complete Genome	99.48	0	7783599	7608611	71.5	3	HQ	PRJNA158251	SAMN02469977
GCF_000269985.1	Kitasatospora setae KM-6054	Kitasatospora	setae	OK	Complete Genome	97.58	1.66	8783278	8783278	74	1	HQ	PRJDA19951	SAMD00060928
GCF_000280725.2	Rhodococcus sp. JVH1	Rhodococcus	sp.	OK	Complete Genome	99.25	0.33	9321263	8031895	67	3	HQ	PRJNA46601	SAMN02471208
GCF_000282715.1	Amycolatopsis mediterranei S699	Amycolatopsis	mediterranei	OK	Complete Genome	97.03	1.56	10246920	10246920	71.5	1	HQ	PRJNA170006	SAMN02603408
GCF_000297395.2	Micromonospora lupini str. Lupac 08	Micromonospora	lupini	OK	Scaffold	98.74	0.61	7325824	271488	72	50	MQ	PRJNA84455	SAMEA3138422
GCF_000308355.2	Nocardia asteroides NBRC 15531	Nocardia	asteroides	OK	Contig	98.19	4.35	6954782	472953	70	39	MQ	PRJDB6	SAMD00041823
GCF_000328705.1	Saccharothrix espanaensis DSM 44229	Saccharothrix	espanaensis	OK	Complete Genome	99.5	1.12	9360653	9360653	72	1	HQ	PRJEB28	SAMEA2272236
GCF_000331185.2	Streptomyces rimosus subsp. rimosus ATCC 10970	Streptomyces	rimosus	OK	Complete Genome	99.62	1.86	9643891	9351267	72	2	HQ	PRJNA182749	SAMN02471950
GCF_000347955.2	Rhodococcus ruber Chol-4	Rhodococcus	ruber	OK	Scaffold	99.37	0.99	5464707	315307	70.5	50	MQ	PRJNA176883	SAMN01804522
GCF_000349325.1	Streptomyces davaonensis JCM 4913	Streptomyces	davaonensis	OK	Chromosome	99.27	0.88	9555950	5836073	70.5	4	HQ	PRJEB184	SAMEA2272568
GCF_000359525.1	Streptomyces albidoflavus	Streptomyces	albidoflavus	OK	Complete Genome	99.53	1.42	6841649	6841649	73.5	1	HQ	PRJNA180996	SAMN02603310
GCF_000364805.1	Streptomyces sp. PAMC 26508	Streptomyces	sp.	OK	Complete Genome	99.43	0.09	7630245	7526197	71	2	HQ	PRJNA182709	SAMN02180670
GCF_000371885.1	Amycolatopsis methanolica 239	Amycolatopsis	methanolica	OK	Contig	98.66	0.33	7196860	6804661	71.5	2	MQ	PRJNA82743	SAMN02261309
GCF_000381925.1	Nocardia sp. BMG111209	Nocardia	sp.	OK	Scaffold	98.28	0	9143142	5053862	69	6	MQ	PRJNA185291	SAMN02440989
GCF_000384215.1	Amycolatopsis alba DSM 44262	Amycolatopsis	alba	OK	Scaffold	99	0	9811274	7623610	68.5	2	MQ	PRJNA161649	SAMN02261260
GCF_000384315.1	Amycolatopsis nigrescens CSC17Ta-90	Amycolatopsis	nigrescens	OK	Contig	99.06	0.17	9111009	9111009	70	1	MQ	PRJNA82633	SAMN02261308
GCF_000385945.1	Streptomyces microflavus DSM 40593	Streptomyces	microflavus	OK	Complete Genome	99.76	0.49	7905758	7905758	71.5	1	HQ	PRJNA192408	SAMN02603305
GCF_000400635.2	Amycolatopsis keratiniphila	Amycolatopsis	keratiniphila	OK	Complete Genome	98.89	0.58	8982090	8948591	69	2	HQ	PRJNA85603	SAMN02603859
GCF_000412265.2	Streptomyces sp. Mg1	Streptomyces	sp.	OK	Complete Genome	99.53	1.7	8716193	7868178	72	4	HQ	PRJNA207881	SAMN02471086
GCF_000454045.1	Rhodococcus erythropolis CCM2595	Rhodococcus	erythropolis	OK	Complete Genome	95.36	1.89	6371421	6281198	62.5	2	HQ	PRJNA81583	SAMN02603403
GCF_000470885.1	Rhodococcus aetherivorans	Rhodococcus	aetherivorans	OK	Chromosome	99.19	0.66	6231823	389028	70.5	30	HQ	PRJNA213668	SAMN02470652
GCF_000473265.1	Amycolatopsis thermoflava N1165	Amycolatopsis	thermoflava	OK	Scaffold	98.4	0	8693468	5120345	71.5	7	MQ	PRJNA78289	SAMN02441454
GCF_000526215.1	Nocardia sp. BMG51109	Nocardia	sp.	OK	Contig	98.41	0.22	8787999	8533894	69	4	MQ	PRJNA179462	SAMN02584923
GCF_000612545.2	Streptomyces sp. PCS3-D2	Streptomyces	sp.	OK	Complete Genome	99.62	0.69	7628241	7512055	72	3	HQ	PRJNA236535	SAMN02597788
GCF_000710755.1	Saccharopolyspora rectivirgula	Saccharopolyspora	rectivirgula	OK	Contig	100	0.5	3961468	266613	69	50	MQ	PRJNA252549	SAMN02851309
GCF_000744225.1	Kitasatospora mediocidica KCTC 9733	Kitasatospora	mediocidica	OK	Contig	97.98	3.09	8681761	1536119	72	7	MQ	PRJNA234781	SAMN02745411
GCF_000744785.1	Kitasatospora azatica KCTC 9699	Kitasatospora	azatica	OK	Contig	97.23	2.95	8272299	5708283	71.5	3	MQ	PRJNA234862	SAMN02745392
GCF_000754115.1	Amycolatopsis sp. MJM2582	Amycolatopsis	sp.	OK	Scaffold	98.83	0.32	8932977	353379	69	42	MQ	PRJNA245052	SAMN02731374
GCF_000763325.2	Rhodococcus sp. p52	Rhodococcus	sp.	OK	Complete Genome	99.08	0.66	5413283	4893347	68	4	HQ	PRJNA255270	SAMN02911797
GCF_000772045.1	Streptomyces sp. CCM_MD2014	Streptomyces	sp.	OK	Complete Genome	99.62	0.32	8274043	8274043	72	1	HQ	PRJNA263735	SAMN03106103
GCF_000802245.2	Streptomyces pluripotens	Streptomyces	pluripotens	OK	Complete Genome	99.4	1.26	7346075	7346075	70	1	HQ	PRJNA261097	SAMN03070117
GCF_000816025.1	Streptomyces sp. 769	Streptomyces	sp.	OK	Complete Genome	99.66	2.68	10338286	10100774	71.5	2	HQ	PRJNA182073	SAMN03275450
GCF_000830005.1	Streptomyces vietnamensis	Streptomyces	vietnamensis	OK	Complete Genome	99.91	2.19	9153777	8867142	72	2	HQ	PRJNA244969	SAMN02730132
GCF_000836635.1	Kitasatospora griseola	Kitasatospora	griseola	OK	Contig	96.72	2.88	7966157	2590787	72.5	8	MQ	PRJNA274276	SAMN03324877
GCF_000876225.1	Micromonospora haikouensis	Micromonospora	haikouensis	OK	Contig	96.21	4.58	7626891	4042269	74	3	MQ	PRJNA273690	SAMN03295202
GCF_000943515.2	Amycolatopsis orientalis	Amycolatopsis	orientalis	OK	Complete Genome	98.76	1.34	9490992	9490992	69	1	HQ	PRJNA271322	SAMN03273949
GCF_000949305.1	Rhodococcus sp. AD45	Rhodococcus	sp.	OK	Contig	99.19	1.77	6794789	1521985	61.5	9	MQ	PRJNA272922	SAMN03329995
GCF_000975175.1	Rhodococcus erythropolis	Rhodococcus	erythropolis	OK	Complete Genome	96.6	3.71	6865205	6334075	62.5	4	HQ	PRJNA280916	SAMN03480662
GCF_000982715.1	Rhodococcus aetherivorans	Rhodococcus	aetherivorans	OK	Complete Genome	94.36	0.7	5922748	5922748	70.5	1	HQ	PRJNA281168	SAMN03486836
GCF_000993785.3	Streptomyces xiamenensis	Streptomyces	xiamenensis	OK	Complete Genome	95.2	0.13	5961402	5961402	72	1	HQ	PRJNA73797	SAMN03332981
GCF_001011035.1	Streptomyces sp. CNQ-509	Streptomyces	sp.	OK	Complete Genome	99.43	0.38	8039333	8039333	73	1	HQ	PRJNA284218	SAMN03699827
GCF_001013905.1	Streptomyces leeuwenhoekii	Streptomyces	leeuwenhoekii	OK	Complete Genome	100	1.52	8122491	7903895	72.5	3	HQ	PRJEB8583	SAMEA3258058
GCF_001040705.1	Rhodococcus sp. RD6.2	Rhodococcus	sp.	OK	Contig	98.5	2.62	5572456	709843	68.5	13	MQ	PRJEB8922	SAMEA3297057
GCF_001040905.1	Streptomyces sp. PBH53	Streptomyces	sp.	OK	Chromosome	99.34	1.69	9153597	2023887	72.5	18	HQ	PRJNA268366	SAMN03218484
GCF_001182745.1	Nocardia farcinica	Nocardia	farcinica	OK	Complete Genome	99.15	2.41	6459780	3648762	70.5	5	HQ	PRJEB6403	SAMEA2498477
GCF_001267885.1	Streptomyces ambofaciens ATCC 23877	Streptomyces	ambofaciens	OK	Complete Genome	99.11	0.44	8393598	8303940	72	2	HQ	PRJNA93	SAMN03921868
GCF_001278095.1	Streptomyces sp. CFMR 7	Streptomyces	sp.	OK	Complete Genome	99.86	1.43	8307279	8207742	72	2	HQ	PRJNA282459	SAMN03463183
GCF_001294645.1	Pseudonocardia sp. HH130629-09	Pseudonocardia	sp.	OK	Complete Genome	92.83	2.15	6300975	6058802	73.5	2	HQ	PRJNA280814	SAMN03470467
GCF_001427185.1	Nocardia sp. Root136	Nocardia	sp.	OK	Scaffold	98.76	3.27	7282860	885723	67.5	15	MQ	PRJNA297942	SAMN04155727
GCF_001431765.1	Streptomyces sp. FR-008	Streptomyces	sp.	OK	Complete Genome	98.4	0.69	7258031	7090955	73.5	3	HQ	PRJNA264353	SAMN03120580
GCF_001434355.1	Streptomyces anulatus	Streptomyces	anulatus	OK	Chromosome	99.91	0	8847108	2269932	71.5	8	HQ	PRJNA257397	SAMN02951406
GCF_001484565.1	Streptomyces sp. CdTB01	Streptomyces	sp.	OK	Complete Genome	99.44	2.71	10191567	9902731	71.5	2	HQ	PRJNA302338	SAMN04235813
GCF_001542625.1	Streptomyces griseochromogenes	Streptomyces	griseochromogenes	OK	Complete Genome	99.15	1.14	10764674	10764674	71	1	HQ	PRJNA307132	SAMN04375936
GCF_001577385.1	Streptomyces albidoflavus	Streptomyces	albidoflavus	OK	Complete Genome	99.24	0.69	7170504	7170504	73.5	1	HQ	PRJNA295319	SAMN04053756
GCF_001598115.1	Streptomyces sp. AgN23	Streptomyces	sp.	OK	Complete Genome	99.72	2.49	10858739	10858739	71	1	HQ	PRJNA236074	SAMN03448045
GCF_001611795.1	Streptomyces qaidamensis	Streptomyces	qaidamensis	OK	Complete Genome	99.81	0.76	9083372	9083372	71.5	1	HQ	PRJNA316940	SAMN04592628
GCF_001612805.1	Nocardia coubleae NBRC 108252	Nocardia	coubleae	OK	Contig	98.36	4.11	6619824	284104	68	40	MQ	PRJDB156	SAMD00018775
GCF_001612885.1	Nocardia harenae NBRC 108248	Nocardia	harenae	OK	Contig	97.18	2.8	6144291	650297	72	25	MQ	PRJDB161	SAMD00040653
GCF_001612945.1	Nocardia inohanensis NBRC 100128	Nocardia	inohanensis	OK	Contig	96.76	4.26	8118011	562521	68	26	MQ	PRJDB164	SAMD00040655
GCF_001613505.1	Nocardia mikamii NBRC 108933	Nocardia	mikamii	OK	Contig	98.87	3.06	7562813	420664	68	42	MQ	PRJDB474	SAMD00040659
GCF_001623435.1	Rhodococcus qingshengii	Rhodococcus	qingshengii	OK	Contig	99.47	0	6399510	1403103	62.5	10	MQ	PRJNA316739	SAMN04589880
GCF_001632865.1	Streptomyces ambofaciens	Streptomyces	ambofaciens	OK	Complete Genome	99.48	0.57	8137876	8137876	72.5	1	HQ	PRJNA298666	SAMN04160834
GCF_001636945.3	Streptomyces sp. FXJ1.172	Streptomyces	sp.	OK	Complete Genome	99.81	1.55	10017519	9260576	71	3	HQ	PRJNA319451	SAMN04892703
GCF_001650215.1	Streptomyces sp. RTd22	Streptomyces	sp.	OK	Complete Genome	96.19	0.69	11142275	11142275	71.5	1	HQ	PRJNA320307	SAMN04901306
GCF_001652995.1	Micromonospora sp. NBRC 110037	Micromonospora	sp.	OK	Scaffold	97.85	3.13	6795311	629027	73	26	MQ	PRJDB3540	SAMD00026623
GCF_001654495.1	Streptomyces sp. SAT1	Streptomyces	sp.	OK	Complete Genome	100	1.14	7472530	7472530	73	1	HQ	PRJNA321638	SAMN05161780
GCF_001660045.1	Streptomyces parvulus	Streptomyces	parvulus	OK	Complete Genome	99.91	0.76	7766531	7149446	72.5	2	HQ	PRJNA320204	SAMN04924834
GCF_001662505.1	Rhodococcus qingshengii	Rhodococcus	qingshengii	OK	Contig	99.52	0.78	6712257	649502	62.5	25	MQ	PRJNA323519	SAMN05180531
GCF_001682295.1	Rhodococcus sp. 008	Rhodococcus	sp.	OK	Complete Genome	99.48	0.33	7438324	6570200	62.5	4	HQ	PRJNA296603	SAMN04101985
GCF_001685355.1	Streptomyces lincolnensis	Streptomyces	lincolnensis	OK	Complete Genome	99.72	0.51	10319054	10319054	71	1	HQ	PRJNA327477	SAMN05335414
GCF_001685605.1	Rhodococcus opacus	Rhodococcus	opacus	OK	Complete Genome	99.59	2.51	8637535	7687653	67	3	HQ	PRJNA253567	SAMN02872839
GCF_001700945.1	Rhodococcus sp. WB1	Rhodococcus	sp.	OK	Complete Genome	99.52	0.66	6148559	5924026	70.5	2	HQ	PRJNA317416	SAMN04606842
GCF_001704275.1	Streptomyces noursei ATCC 11455	Streptomyces	noursei	OK	Complete Genome	99.79	1.91	9815884	9815884	71.5	1	HQ	PRJNA272896	SAMN03287657
GCF_001715845.1	Rhodococcus erythropolis	Rhodococcus	erythropolis	OK	Contig	94.58	1.57	6279737	608915	62.5	37	MQ	PRJNA338215	SAMN05526282
GCF_001735805.1	Streptomyces fodineus	Streptomyces	fodineus	OK	Complete Genome	98.83	0.62	9698948	9698948	71	1	HQ	PRJNA338069	SAMN05520841
GCF_001767395.1	Rhodococcus sp. WMMA185	Rhodococcus	sp.	OK	Complete Genome	96.85	2.05	4444448	4444448	64	1	HQ	PRJNA338664	SAMN05560454
GCF_001831305.1	Rhodococcus erythropolis	Rhodococcus	erythropolis	OK	Contig	90.03	1.98	6549507	378631	62.5	38	MQ	PRJNA348829	SAMN05915915
GCF_001855515.1	Micromonospora sp. WMMB235	Micromonospora	sp.	OK	Contig	99.06	1.59	7031295	7016598	73	2	MQ	PRJNA339227	SAMN05583721
GCF_001886355.1	Rhodococcus sp. 2G	Rhodococcus	sp.	OK	Complete Genome	99.41	0.99	5596514	5231430	67.5	2	HQ	PRJNA353162	SAMN06011250
GCF_001890475.2	Rhodococcus sp. M8	Rhodococcus	sp.	OK	Contig	99.06	1.16	6317587	3396772	70.5	13	MQ	PRJNA347902	SAMN05905582
GCF_001894805.1	Rhodococcus globerulus NBRC 14531	Rhodococcus	globerulus	OK	Contig	99.14	0.78	6735237	1442425	61.5	30	MQ	PRJDB295	SAMD00047211
GCF_001894905.1	Rhodococcus pyridinivorans JCM 10940 = NBRC 100608	Rhodococcus	pyridinivorans	OK	Contig	96.69	2.37	5205912	380295	68	41	MQ	PRJDB301	SAMD00046767
GCF_001895045.1	Rhodococcus coprophilus NBRC 100603	Rhodococcus	coprophilus	OK	Contig	96.69	1.04	4549097	438482	67	30	MQ	PRJDB290	SAMD00046763
GCF_001905755.1	Amycolatopsis sp. CB00013	Amycolatopsis	sp.	OK	Scaffold	99	0.32	9016033	915271	69	13	MQ	PRJNA293172	SAMN03999394
GCF_001931635.1	Streptomyces sp. Tue 6075	Streptomyces	sp.	OK	Complete Genome	99.96	0.19	7931832	7931832	71.5	1	HQ	PRJNA273702	SAMN03295241
GCF_001941845.1	Streptomyces sp. TN58	Streptomyces	sp.	OK	Complete Genome	99.99	0.76	7585034	7585034	72.5	1	HQ	PRJNA354687	SAMN06167403
GCF_001942025.1	Rhodococcus sp. YL-1	Rhodococcus	sp.	OK	Complete Genome	99.52	0.78	7594958	6367154	62.5	6	HQ	PRJNA343344	SAMN05786337
GCF_001975025.1	Streptomyces alfalfae	Streptomyces	alfalfae	OK	Complete Genome	99.15	0.13	8625867	8625867	72	1	HQ	PRJNA320684	SAMN04955000
GCF_001984195.1	Kribbella sp. ALI-6-A	Kribbella	sp.	OK	Contig	98.15	2.94	8101914	1313159	70	12	MQ	PRJNA360627	SAMN06213931
GCF_001984445.1	Streptomyces lydicus	Streptomyces	lydicus	OK	Complete Genome	99.53	1.89	8243179	8243179	72	1	HQ	PRJNA363007	SAMN06251699
GCF_001989395.1	Nocardia donostiensis	Nocardia	donostiensis	OK	Contig	97.3	1.08	5790100	214582	66.5	49	MQ	PRJNA304984	SAMN06246729
GCF_002007685.1	Streptomyces sp. fd1-xmd	Streptomyces	sp.	OK	Complete Genome	99.53	0.57	7929999	7929999	72.5	1	HQ	PRJNA374669	SAMN06329945
GCF_002028385.1	Streptomyces sp. 3211	Streptomyces	sp.	OK	Complete Genome	99.91	1.33	8991292	8232231	71.5	3	HQ	PRJNA377638	SAMN06464033
GCF_002079265.1	Rhodococcus sp. BH4	Rhodococcus	sp.	OK	Complete Genome	99.41	0.99	7019149	6314891	62.5	2	HQ	PRJNA313101	SAMN04538165
GCF_002080455.1	Streptomyces sp. Sge12	Streptomyces	sp.	OK	Complete Genome	99.57	0.76	8110698	7983613	72	2	HQ	PRJNA380743	SAMN06647473
GCF_002081795.1	Nocardia donostiensis	Nocardia	donostiensis	OK	Contig	97.03	0.94	5772712	308570	66.5	38	MQ	PRJNA304984	SAMN04312206
GCF_002082605.1	Kitasatospora aureofaciens	Kitasatospora	aureofaciens	OK	Complete Genome	96.97	2.07	7076402	6824334	72.5	2	HQ	PRJNA381130	SAMN06670791
GCF_002087025.1	Rhodococcus qingshengii	Rhodococcus	qingshengii	OK	Scaffold	99.59	0.08	6469205	350419	62.5	40	MQ	PRJNA362840	SAMN06264123
GCF_002090335.1	Streptomyces sp. MOE7	Streptomyces	sp.	OK	Complete Genome	96.96	1.89	8399509	8399509	72	1	HQ	PRJNA368919	SAMN06271910
GCF_002094995.1	Streptomyces sp. S8	Streptomyces	sp.	OK	Complete Genome	99.53	0.68	7601864	7529075	72.5	2	HQ	PRJNA318942	SAMN04870419
GCF_002128305.1	Streptomyces marincola	Streptomyces	marincola	OK	Complete Genome	96.05	1.45	6287975	6287975	73.5	1	HQ	PRJNA385202	SAMN06883772
GCF_002189675.2	Streptomyces alboflavus	Streptomyces	alboflavus	OK	Complete Genome	95.86	0.82	9967549	9622415	72	3	HQ	PRJNA388234	SAMN07173524
GCF_002214185.1	Streptomyces capitiformicae	Streptomyces	capitiformicae	OK	Chromosome	99.91	1.23	10989391	5694461	70	4	HQ	PRJNA391271	SAMN07260326
GCF_002245895.1	Rhodococcus sp. OK302	Rhodococcus	sp.	OK	Contig	98.38	2.15	6790176	6015581	61.5	2	MQ	PRJNA331842	SAMN05444668
GCF_002269365.1	Rhodococcus pyridinivorans	Rhodococcus	pyridinivorans	OK	Complete Genome	96.78	3.56	5303895	5303895	68	1	HQ	PRJNA398330	SAMN07510605
GCF_002288075.1	Streptomyces sp. CLI2509	Streptomyces	sp.	OK	Complete Genome	96.31	0	7232701	7088673	73.5	2	HQ	PRJNA384988	SAMN06855397
GCF_002300185.1	Rhodococcus sp. ACPA4	Rhodococcus	sp.	OK	Scaffold	99.25	0.78	7067124	3616808	61.5	11	MQ	PRJNA272922	SAMN07511353
GCF_002300195.1	Rhodococcus sp. ACPA1	Rhodococcus	sp.	OK	Scaffold	98.92	2.45	10060829	1120468	67	48	MQ	PRJNA272922	SAMN07511352
GCF_002501585.1	Rhodococcus sp. H-CA8f	Rhodococcus	sp.	OK	Complete Genome	99.25	0.94	6497607	6196004	62.5	2	HQ	PRJNA411856	SAMN07689502
GCF_002554515.1	Nocardia sp. FDAARGOS_372	Nocardia	sp.	OK	Contig	99.56	3.33	6464747	6376570	70.5	2	MQ	PRJNA231221	SAMN07312416
GCF_002564045.1	Amycolatopsis sulphurea	Amycolatopsis	sulphurea	OK	Contig	97.03	2.52	6856290	5507604	69.5	2	MQ	PRJNA303750	SAMN04489728
GCF_002573675.1	Micromonospora sp. WMMA1996	Micromonospora	sp.	OK	Contig	97.55	3.59	6444826	4110435	74	10	MQ	PRJNA407783	SAMN07663079
GCF_002591335.1	Streptomyces malaysiensis	Streptomyces	malaysiensis	OK	Complete Genome	99.91	2.27	10744231	10694678	71	2	HQ	PRJNA396489	SAMN07427119
GCF_002688545.1	Micromonospora sp. WMMA2032	Micromonospora	sp.	OK	Chromosome	97.16	2.65	6483419	6483319	73.5	1	HQ	PRJNA407783	SAMN07666506
GCF_002741725.1	Rhodococcus ruber	Rhodococcus	ruber	OK	Complete Genome	98.72	0	5522075	5522075	70.5	1	HQ	PRJNA415879	SAMN07836922
GCF_002803145.1	Kitasatospora sp. CB02891	Kitasatospora	sp.	OK	Scaffold	97.54	2.13	8076080	354875	73	38	MQ	PRJNA393980	SAMN07346486
GCF_002803845.1	Streptomyces lavendulae subsp. lavendulae	Streptomyces	lavendulae	OK	Complete Genome	99.87	2.08	8932792	8691711	72.5	2	HQ	PRJNA407779	SAMN07663065
GCF_002804165.1	Streptomyces cavourensis	Streptomyces	cavourensis	OK	Complete Genome	99.86	0.87	7600475	7600475	72	1	HQ	PRJNA419149	SAMN08043808
GCF_002812405.1	Streptomyces sp. M56	Streptomyces	sp.	OK	Complete Genome	99.91	2.37	11742376	11742376	71	1	HQ	PRJNA392941	SAMN07312782
GCF_002832675.1	Streptomyces sp. S063	Streptomyces	sp.	OK	Complete Genome	96.77	0	7614683	7614683	71.5	1	HQ	PRJNA388536	SAMN07178425
GCF_002846365.1	Nocardia fluminea	Nocardia	fluminea	OK	Contig	98.38	4.06	8057701	5980900	67.5	4	MQ	PRJNA303800	SAMN04489843
GCF_002846615.1	Amycolatopsis echigonensis	Amycolatopsis	echigonensis	OK	Contig	98.54	3.46	9312963	8366534	69.5	3	MQ	PRJNA303744	SAMN04489734
GCF_002847285.1	Streptomyces sp. CMB-StM0423	Streptomyces	sp.	OK	Complete Genome	98.48	0.57	8029398	8029398	73	1	HQ	PRJNA421969	SAMN08161523
GCF_002863905.1	Rhodococcus ruber	Rhodococcus	ruber	OK	Complete Genome	98.87	1.11	5919443	5592192	70.5	3	HQ	PRJNA415353	SAMN07821914
GCF_002893965.1	Rhodococcus qingshengii	Rhodococcus	qingshengii	OK	Complete Genome	99.25	0.18	6700013	6518575	62.5	4	HQ	PRJNA429114	SAMN08329308
GCF_002910725.2	Streptomyces sp. SM17	Streptomyces	sp.	OK	Complete Genome	99.37	0.69	7179914	6975788	73.5	4	HQ	PRJNA384120	SAMN06828995
GCF_002910775.2	Streptomyces sp. SM18	Streptomyces	sp.	OK	Complete Genome	99.91	0.88	7703166	7703166	72	1	HQ	PRJNA384120	SAMN06828993
GCF_002943525.1	Kitasatospora sp. MMS16-BH015	Kitasatospora	sp.	OK	Complete Genome	98.01	2.45	8963858	8963858	72.5	1	HQ	PRJNA392977	SAMN08022118
GCF_002943895.1	Streptomyces sp. WAC00288	Streptomyces	sp.	OK	Complete Genome	99.62	0.8	7852859	7467777	72.5	5	HQ	PRJNA434467	SAMN08559993
GCF_002946835.1	Streptomyces dengpaensis	Streptomyces	dengpaensis	OK	Complete Genome	99.91	1.23	8710171	8541354	70	3	HQ	PRJNA433056	SAMN08469739
GCF_002949635.1	Nocardia cyriacigeorgica	Nocardia	cyriacigeorgica	OK	Complete Genome	99.43	1.65	6462637	6320090	68.5	2	HQ	PRJNA432572	SAMN08458266
GCF_003004765.2	Rhodococcus rhodochrous	Rhodococcus	rhodochrous	OK	Chromosome	98.89	0.33	5717651	5556423	68	2	HQ	PRJNA437303	SAMN08648226
GCF_003014735.1	Saccharothrix carnea	Saccharothrix	carnea	OK	Contig	100	2.57	8918169	573849	71.5	40	MQ	PRJNA370114	SAMN06295939
GCF_003023755.1	Rhodococcus sp. AD45-ID	Rhodococcus	sp.	OK	Scaffold	99.25	1.11	6452651	1205189	62	11	MQ	PRJNA272922	SAMN08723114
GCF_003032475.1	Streptomyces sp. P3	Streptomyces	sp.	OK	Complete Genome	99.91	0.85	9851971	9851971	71.5	1	HQ	PRJNA437360	SAMN08660902
GCF_003050885.1	Rhodococcus sp. OK611	Rhodococcus	sp.	OK	Contig	98.72	2.95	5731169	243187	69	41	MQ	PRJNA443388	SAMN08778928
GCF_003054555.1	Streptomyces lunaelactis	Streptomyces	lunaelactis	OK	Complete Genome	99.12	1.61	8570191	8396100	70	3	HQ	PRJNA430192	SAMN08367447
GCF_003074055.1	Streptomyces nigra	Streptomyces	nigra	OK	Complete Genome	99.53	0.19	7641029	7641029	72	1	HQ	PRJNA451055	SAMN08957528
GCF_003097515.1	Streptomyces tirandamycinicus	Streptomyces	tirandamycinicus	OK	Complete Genome	99.15	0.35	7289495	7289495	72.5	1	HQ	PRJNA454035	SAMN08996718
GCF_003122365.1	Streptomyces spongiicola	Streptomyces	spongiicola	OK	Complete Genome	99.53	0.24	7180417	7180417	72.5	1	HQ	PRJNA453635	SAMN08984914
GCF_003130705.1	Rhodococcus oxybenzonivorans	Rhodococcus	oxybenzonivorans	OK	Complete Genome	99.02	2.07	8014224	6611769	65.5	4	HQ	PRJNA386772	SAMN07126182
GCF_003147545.1	Streptomyces globisporus	Streptomyces	globisporus	OK	Complete Genome	93.45	0.35	7666521	7488586	71.5	3	HQ	PRJNA470782	SAMN09104458
GCF_003173275.1	Streptomyces sp. NEAU-S7GS2	Streptomyces	sp.	OK	Complete Genome	99.94	0.69	9687439	9641634	71	2	HQ	PRJNA471769	SAMN09217500
GCF_003182135.1	Nocardia neocaledoniensis	Nocardia	neocaledoniensis	OK	Scaffold	98.52	3.28	7323073	433497	69.5	33	MQ	PRJNA463396	SAMN09074699
GCF_003182415.1	Actinokineospora spheciospongiae	Actinokineospora	spheciospongiae	OK	Scaffold	100	1.16	7546603	442119	73	32	MQ	PRJNA463318	SAMN09074798
GCF_003253475.1	Micromonospora phaseoli	Micromonospora	phaseoli	OK	Scaffold	95.79	2.86	6497946	478389	71.5	29	MQ	PRJNA402486	SAMN07621707
GCF_003261055.1	Streptomyces cadmiisoli	Streptomyces	cadmiisoli	OK	Complete Genome	100	0.82	10239272	9269371	71	2	HQ	PRJNA475413	SAMN09388963
GCF_003264445.1	Micromonospora saelicesensis	Micromonospora	saelicesensis	OK	Contig	98.77	4.72	7378898	485329	71	41	MQ	PRJNA437373	SAMN08715775
GCF_003264475.1	Micromonospora noduli	Micromonospora	noduli	OK	Contig	98.6	3.43	7230291	354266	71	43	MQ	PRJNA438059	SAMN08715671
GCF_003268535.2	Streptomyces sp. ST1015	Streptomyces	sp.	OK	Complete Genome	97.52	0.88	10171198	10171198	71.5	1	HQ	PRJNA321183	SAMN04967901
GCF_003268675.1	Streptomyces bacillaris	Streptomyces	bacillaris	OK	Complete Genome	98.44	1.06	7888441	7888441	72	1	HQ	PRJNA471017	SAMN09197286
GCF_003287915.1	Streptomyces sp. ICC4	Streptomyces	sp.	OK	Chromosome	100	0.69	9010404	1221215	72	18	HQ	PRJNA268366	SAMN08559943
GCF_003288095.1	Rhodococcus pyridinivorans	Rhodococcus	pyridinivorans	OK	Complete Genome	96.77	3.48	5034221	5034221	68	1	HQ	PRJNA390866	SAMN07251647
GCF_003313445.1	Rhodococcus sp. AQ5-07	Rhodococcus	sp.	OK	Scaffold	99.52	0.73	6749231	700215	62.5	34	MQ	PRJNA418877	SAMN08038441
GCF_003315815.1	Micromonospora sp. LHW51205	Micromonospora	sp.	OK	Contig	98.77	3.39	6677882	897206	73	24	MQ	PRJNA477685	SAMN09476201
GCF_003330845.1	Streptomyces sp. Go-475	Streptomyces	sp.	OK	Complete Genome	100	0.76	8570609	8570609	72	1	HQ	PRJNA430025	SAMN08364892
GCF_003330865.1	Streptomyces atratus	Streptomyces	atratus	OK	Complete Genome	100	0.51	9641288	9641288	69.5	1	HQ	PRJNA436062	SAMN08612569
GCF_003344445.1	Streptomyces lincolnensis	Streptomyces	lincolnensis	OK	Complete Genome	99.24	0.13	9513637	9513637	71	1	HQ	PRJNA335896	SAMN05466746
GCF_003344965.1	Streptomyces paludis	Streptomyces	paludis	OK	Complete Genome	100	0.76	8454852	8454852	71	1	HQ	PRJNA482168	SAMN09699158
GCF_003350525.1	Nocardia mexicana	Nocardia	mexicana	OK	Scaffold	97	3.74	8981212	601241	68.5	43	MQ	PRJNA463395	SAMN09074698
GCF_003351365.1	Micromonospora aurantiaca	Micromonospora	aurantiaca	OK	Complete Genome	99.22	0.8	7255264	7255264	73	1	HQ	PRJNA482026	SAMN09694340
GCF_003352445.1	Streptomyces cavourensis	Streptomyces	cavourensis	OK	Complete Genome	99.86	0.87	7613757	7613757	72	1	HQ	PRJNA480589	SAMN09642110
GCF_003355155.1	Streptomyces armeniacus	Streptomyces	armeniacus	OK	Chromosome	99.4	0.95	8083249	1912867	72.5	21	HQ	PRJNA481761	SAMN09690035
GCF_003369795.1	Streptomyces sp. CB09001	Streptomyces	sp.	OK	Complete Genome	99.87	0	7787608	7787608	72	1	HQ	PRJNA433315	SAMN08474659
GCF_003385055.1	Rhodococcus wratislaviensis	Rhodococcus	wratislaviensis	OK	Contig	99.59	1.24	7835688	7835688	67.5	1	MQ	PRJNA442708	SAMN08775539
GCF_003428925.1	Streptomyces koyangensis	Streptomyces	koyangensis	OK	Complete Genome	99.46	0.51	7220839	7220839	73	1	HQ	PRJNA486241	SAMN09842183
GCF_003443735.1	Streptomyces sp. CC0208	Streptomyces	sp.	OK	Complete Genome	99.91	0.38	9320089	9320089	70.5	1	HQ	PRJNA488148	SAMN09925543
GCF_003586525.1	Rhodococcus ruber	Rhodococcus	ruber	OK	Complete Genome	99.34	0.89	5907935	5669852	70	3	HQ	PRJNA401381	SAMN07604018
GCF_003595235.1	Streptomyces griseorubiginosus	Streptomyces	griseorubiginosus	OK	Complete Genome	100	0.38	9512378	9512378	71	1	HQ	PRJNA483085	SAMN09725998
GCF_003595545.1	Streptomyces sp. 11-1-2	Streptomyces	sp.	OK	Complete Genome	98.58	2.37	11655206	11603877	71	2	HQ	PRJNA393858	SAMN07342914
GCF_003612775.1	Micromonospora tulbaghiae	Micromonospora	tulbaghiae	OK	Complete Genome	98.92	1.81	7228472	7228472	72.5	1	HQ	PRJNA415039	SAMN07812372
GCF_003626495.1	Rhodococcus opacus	Rhodococcus	opacus	OK	Contig	98.35	2.55	8814110	8075439	67	2	MQ	PRJNA407777	SAMN07663063
GCF_003626595.1	Micromonospora endolithica	Micromonospora	endolithica	OK	Scaffold	97.22	4.26	6971005	422612	72.5	41	MQ	PRJNA493695	SAMN10141349
GCF_003634935.1	Saccharothrix australiensis	Saccharothrix	australiensis	OK	Contig	99	1.58	7861373	7811991	73.5	3	MQ	PRJNA442832	SAMN08778305
GCF_003634995.1	Saccharothrix variisporea	Saccharothrix	variisporea	OK	Contig	100	0.08	9408895	9408895	71.5	1	MQ	PRJNA460962	SAMN09070812
GCF_003635025.1	Saccharopolyspora antimicrobica	Saccharopolyspora	antimicrobica	OK	Contig	100	2.65	8266186	8125734	70.5	2	MQ	PRJNA303859	SAMN04490245
GCF_003663795.1	Actinokineospora cianjurensis	Actinokineospora	cianjurensis	OK	Scaffold	100	1.08	7615874	1225445	71	19	MQ	PRJNA402490	SAMN07621016
GCF_003675325.1	Streptomyces dangxiongensis	Streptomyces	dangxiongensis	OK	Complete Genome	96.19	0.22	8157885	8085191	72	2	HQ	PRJNA474356	SAMN10237529
GCF_003721495.1	Streptomyces sp. ADI95-16	Streptomyces	sp.	OK	Complete Genome	99.91	1.58	9086421	8184000	72	5	HQ	PRJNA503722	SAMN10372319
GCF_003751605.1	Kitasatospora cineracea	Kitasatospora	cineracea	OK	Contig	96.88	2.86	8759731	5867305	74	5	MQ	PRJNA500557	SAMN10363103
GCF_003752005.1	Saccharothrix texasensis	Saccharothrix	texasensis	OK	Contig	99.82	0.66	9178199	9178199	72.5	1	MQ	PRJNA500558	SAMN10363104
GCF_003752125.1	Amycolatopsis thermoflava	Amycolatopsis	thermoflava	OK	Contig	99.06	0.44	8225494	7873949	72	2	MQ	PRJNA500553	SAMN10363431
GCF_003797085.1	Rhodococcus sp. WS3	Rhodococcus	sp.	OK	Scaffold	99.19	1.22	6856161	1535683	61.5	21	MQ	PRJNA272922	SAMN10353455
GCF_003797745.1	Rhodococcus sp. WS1	Rhodococcus	sp.	OK	Contig	99.48	0.73	6560236	2655236	62.5	8	MQ	PRJNA272922	SAMN10352903
GCF_003814885.1	Kitasatospora cineracea	Kitasatospora	cineracea	OK	Contig	98.11	1.15	8578249	6240784	74	7	MQ	PRJNA500556	SAMN10363102
GCF_003860625.1	Rhodococcus sp. NJ-530	Rhodococcus	sp.	OK	Complete Genome	95.81	0.76	7324898	6408544	62.5	5	HQ	PRJNA506529	SAMN10462250
GCF_003931915.1	Saccharopolyspora rhizosphaerae	Saccharopolyspora	rhizosphaerae	OK	Scaffold	99.83	1	5824618	345543	70.5	36	MQ	PRJNA507588	SAMN10498557
GCF_003945505.1	Streptomyces sp. WAC 06738	Streptomyces	sp.	OK	Complete Genome	97.55	0.13	8324535	8324535	73	1	HQ	PRJNA472056	SAMN09238320
GCF_003945525.1	Streptomyces sp. WAC 01438	Streptomyces	sp.	OK	Complete Genome	98.93	0.38	8201167	8138328	72	2	HQ	PRJNA472056	SAMN09238311
GCF_003945545.1	Streptomyces sp. WAC 01529	Streptomyces	sp.	OK	Complete Genome	99.91	0.44	8270461	8270461	71.5	1	HQ	PRJNA472056	SAMN09238312
GCF_003947415.1	Amycolatopsis sp. WAC 01376	Amycolatopsis	sp.	OK	Contig	98.66	1.7	9071542	1271536	68.5	30	MQ	PRJNA472056	SAMN09238307
GCF_003947475.1	Amycolatopsis sp. WAC 04197	Amycolatopsis	sp.	OK	Contig	98.83	0.71	9228587	687865	69	35	MQ	PRJNA472056	SAMN09238315
GCF_003950035.1	Streptomyces sp. W1SF4	Streptomyces	sp.	OK	Complete Genome	99.57	0.95	8068143	7272878	73	3	HQ	PRJNA487679	SAMN09908039
GCF_003950055.1	Streptomyces sp. KPB2	Streptomyces	sp.	OK	Complete Genome	100	0	8082236	8082236	72	1	HQ	PRJNA487680	SAMN09908040
GCF_003955715.1	Streptomyces aquilus	Streptomyces	aquilus	OK	Complete Genome	100	0.57	10393987	10393987	71	1	HQ	PRJNA508841	SAMN10531574
GCF_003963535.1	Streptomyces cyaneochromogenes	Streptomyces	cyaneochromogenes	OK	Complete Genome	99.95	1.99	10677137	10677137	70.5	1	HQ	PRJNA509702	SAMN10587373
GCF_004011825.1	Rhodococcus xishaensis	Rhodococcus	xishaensis	OK	Scaffold	96.66	0.8	3709357	581740	66.5	27	MQ	PRJNA504549	SAMN10395176
GCF_004011835.1	Rhodococcus spongiicola	Rhodococcus	spongiicola	OK	Scaffold	96.65	1.96	3967637	654655	66.5	32	MQ	PRJNA504549	SAMN10395175
GCF_004104485.1	Streptomyces sp. endophyte_N2	Streptomyces	sp.	OK	Complete Genome	99.91	0.98	8428700	8428700	72	1	HQ	PRJNA448806	SAMN08866610
GCF_004104505.1	Streptomyces sp. M2	Streptomyces	sp.	OK	Complete Genome	100	1.7	8718751	8718751	70.5	1	HQ	PRJNA449305	SAMN08895324
GCF_004153645.1	Rhodococcus sp. Q1	Rhodococcus	sp.	OK	Scaffold	98.86	0.33	4969798	402565	68	32	MQ	PRJNA515506	SAMN10756431
GCF_004214935.1	Amycolatopsis suaedae	Amycolatopsis	suaedae	OK	Contig	98.36	4.11	7543886	372399	71	32	MQ	PRJNA520965	SAMN10797506
GCF_004216905.1	Kribbella sp. VKM Ac-2569	Kribbella	sp.	OK	Contig	98.25	3.78	8427108	1270418	68	13	MQ	PRJNA520291	SAMN10872467
GCF_004217135.1	Micromonospora violae	Micromonospora	violae	OK	Contig	97.42	3.07	7139733	7139733	71	1	MQ	PRJNA519698	SAMN10865970
GCF_004217145.1	Kribbella rubisoli	Kribbella	rubisoli	OK	Scaffold	97.31	4.62	8637800	928248	68	22	MQ	PRJNA520282	SAMN10866374
GCF_004328625.1	Streptomyces seoulensis	Streptomyces	seoulensis	OK	Complete Genome	99.75	1.14	6426245	6339363	72	2	HQ	PRJNA486883	SAMN09867566
GCF_004331335.1	Kribbella speibonae	Kribbella	speibonae	OK	Contig	99.09	3.78	8874969	666707	68.5	21	MQ	PRJNA524457	SAMN10979285
GCF_004331345.1	Kribbella soli	Kribbella	soli	OK	Contig	98.25	2.94	8785001	1861369	68.5	10	MQ	PRJNA524457	SAMN10963504
GCF_004331375.1	Kribbella speibonae	Kribbella	speibonae	OK	Contig	99.09	3.78	9285392	1481453	68.5	17	MQ	PRJNA524457	SAMN10963501
GCF_004331455.1	Micromonospora zingiberis	Micromonospora	zingiberis	OK	Contig	92.66	4.26	6506033	275109	71	45	MQ	PRJNA524455	SAMN11026537
GCF_004331485.1	Kribbella capetownensis	Kribbella	capetownensis	OK	Contig	98.32	3.78	8831527	706701	68.5	31	MQ	PRJNA524457	SAMN10963500
GCF_004342025.1	Kribbella steppae	Kribbella	steppae	OK	Scaffold	99.16	4.2	9146758	341731	68	45	MQ	PRJNA520294	SAMN10872470
GCF_004345665.1	Kribbella antiqua	Kribbella	antiqua	OK	Scaffold	98.25	3.78	8102898	441048	67.5	33	MQ	PRJNA520285	SAMN10872464
GCF_004362255.1	Kribbella sp. VKM Ac-2571	Kribbella	sp.	OK	Scaffold	98.92	4.62	8494871	340444	68.5	50	MQ	PRJNA520293	SAMN10872469
GCF_004362515.1	Actinokineospora alba	Actinokineospora	alba	OK	Contig	98.74	0.66	7288615	7288615	69.5	1	MQ	PRJNA442831	SAMN08776642
GCF_004365175.1	Kribbella voronezhensis	Kribbella	voronezhensis	OK	Scaffold	98.92	2.94	8032448	2443601	68	9	MQ	PRJNA519251	SAMN10872472
GCF_004365875.1	Kribbella kalugense	Kribbella	kalugense	OK	Scaffold	98.99	3.78	8322687	1738874	67.5	12	MQ	PRJNA520292	SAMN10872468
GCF_004365925.1	Amycolatopsis arida	Amycolatopsis	arida	OK	Contig	97.39	1.28	6002460	652511	72.5	28	MQ	PRJNA402491	SAMN07621706
GCF_004366005.1	Kribbella sp. VKM Ac-2566	Kribbella	sp.	OK	Scaffold	97.41	3.78	8670423	663294	68	25	MQ	PRJNA520288	SAMN10872465
GCF_004366075.1	Kribbella pratensis	Kribbella	pratensis	OK	Scaffold	97.41	3.78	8387673	1274391	68.5	14	MQ	PRJNA519250	SAMN10872009
GCF_004524875.1	Streptomyces sp. S501	Streptomyces	sp.	OK	Complete Genome	97.54	0.09	7461832	7173651	71	2	HQ	PRJNA493862	SAMN10144670
GCF_004795715.1	Streptomyces sp. SS52	Streptomyces	sp.	OK	Complete Genome	99.24	0.37	8184045	8184045	72.5	1	HQ	PRJNA530858	SAMN11338212
GCF_005049235.1	Rhodococcus oryzae	Rhodococcus	oryzae	OK	Contig	98.39	2.29	5365841	460466	69	31	MQ	PRJNA534007	SAMN11475379
GCF_005233875.1	Kribbella jiaozuonensis	Kribbella	jiaozuonensis	OK	Scaffold	97.07	4.62	8659701	1268375	68	14	MQ	PRJNA540104	SAMN11521819
GCF_005490965.1	Streptomyces sp. SGAir0924	Streptomyces	sp.	OK	Complete Genome	99.95	0	8079654	7653753	72.5	4	HQ	PRJNA388547	SAMN08222724
GCF_005517195.1	Streptomyces vilmorinianum	Streptomyces	vilmorinianum	OK	Complete Genome	99.81	1.17	7646296	7646296	71.5	1	HQ	PRJNA541061	SAMN11571520
GCF_005519465.1	Streptomyces clavuligerus	Streptomyces	clavuligerus	OK	Complete Genome	99.62	0.85	8544086	6748591	72.5	2	HQ	PRJNA414136	SAMN07780489
GCF_005863255.1	Nocardia asteroides NBRC 15531	Nocardia	asteroides	OK	Contig	98.31	3.55	6691984	1514336	70	18	MQ	PRJNA542835	SAMN11640252
GCF_005938745.2	Rhodococcus sp. KBS0724	Rhodococcus	sp.	OK	Contig	99.25	1.95	7254422	6690896	61.5	3	MQ	PRJNA539822	SAMN11620954
GCF_006088715.1	Streptomyces sp. YIM 121038	Streptomyces	sp.	OK	Complete Genome	100	0.69	11098444	10130554	72.5	2	HQ	PRJNA445485	SAMN08792501
GCF_006351985.2	Rhodococcus ruber	Rhodococcus	ruber	OK	Complete Genome	99.1	0	5564747	5352622	70.5	3	HQ	PRJNA527802	SAMN11160054
GCF_006636205.1	Kitasatospora acidiphila	Kitasatospora	acidiphila	OK	Contig	91.23	1.75	8581260	8297640	71.5	3	MQ	PRJNA532311	SAMN11394123
GCF_006704125.1	Rhodococcus spelaei	Rhodococcus	spelaei	OK	Scaffold	97.18	1.21	4805991	425053	69	19	MQ	PRJNA551541	SAMN12158049
GCF_006704225.1	Amycolatopsis sp. Poz14	Amycolatopsis	sp.	OK	Contig	98.88	3.27	10036991	9395517	69.5	2	MQ	PRJNA550434	SAMN12129020
GCF_006715045.1	Amycolatopsis cihanbeyliensis	Amycolatopsis	cihanbeyliensis	OK	Contig	97.36	1.8	7435439	6286745	70	2	MQ	PRJNA538220	SAMN11512385
GCF_006715085.1	Kribbella jejuensis	Kribbella	jejuensis	OK	Contig	97.41	2.94	7505702	4027117	68.5	4	MQ	PRJNA538224	SAMN11512387
GCF_006715105.1	Micromonospora sp. A202	Micromonospora	sp.	OK	Contig	98.19	2.82	6985424	6985424	71	1	MQ	PRJNA536552	SAMN11528553
GCF_006716135.1	Streptomyces calvus	Streptomyces	calvus	OK	Complete Genome	99.78	0.57	7766581	7766581	72.5	1	HQ	PRJNA390440	SAMN07235666
GCF_006716565.1	Nocardia bhagyanarayanae	Nocardia	bhagyanarayanae	OK	Contig	99.31	3.38	7555939	6116456	69	2	MQ	PRJNA537960	SAMN11511976
GCF_006716745.1	Saccharothrix saharensis	Saccharothrix	saharensis	OK	Contig	99.73	1.66	8924967	8924967	72.5	1	MQ	PRJNA547289	SAMN12025562
GCF_007113405.2	Streptomyces sp. RLB1-8	Streptomyces	sp.	OK	Complete Genome	99.91	1.89	11765395	11765395	70	1	HQ	PRJNA553182	SAMN12234503
GCF_007113425.2	Streptomyces sp. RLB3-17	Streptomyces	sp.	OK	Complete Genome	99.85	2.18	12022941	12022941	70	1	HQ	PRJNA553182	SAMN12234765
GCF_007113485.2	Streptomyces sp. S1D4-23	Streptomyces	sp.	OK	Chromosome	99.91	1.83	12057750	6050554	70	2	HQ	PRJNA553182	SAMN12234776
GCF_007113505.2	Streptomyces sp. S1A1-8	Streptomyces	sp.	OK	Complete Genome	99.91	2.21	12037094	12037094	70	1	HQ	PRJNA553182	SAMN12234769
GCF_007113545.2	Streptomyces sp. RLB3-6	Streptomyces	sp.	OK	Chromosome	99.91	2.4	12448484	6653830	70	3	HQ	PRJNA553182	SAMN12234764
GCF_007113565.2	Streptomyces sp. S1A1-7	Streptomyces	sp.	OK	Chromosome	99.91	1.99	12005569	4110985	70	5	HQ	PRJNA553182	SAMN12234768
GCF_007113585.2	Streptomyces sp. S1D4-20	Streptomyces	sp.	OK	Chromosome	99.91	2.02	12245359	6174326	70	3	HQ	PRJNA553182	SAMN12234774
GCF_007362295.1	Nocardia otitidiscaviarum	Nocardia	otitidiscaviarum	OK	Complete Genome	97.5	3.75	7687583	7687583	69	1	HQ	PRJNA554850	SAMN12284987
GCF_007558985.1	Rhodococcus sp. WB9	Rhodococcus	sp.	OK	Complete Genome	99.48	0.75	7704423	7704423	67.5	1	HQ	PRJNA553321	SAMN12234611
GCF_007828865.1	Kribbella amoyensis	Kribbella	amoyensis	OK	Contig	98.99	2.94	8120218	6521605	70	8	MQ	PRJNA538393	SAMN11512343
GCF_007828955.1	Kitasatospora atroaurantiaca	Kitasatospora	atroaurantiaca	OK	Contig	98.11	2.25	7871666	7871666	71	1	MQ	PRJNA538214	SAMN11512374
GCF_007829815.1	Kitasatospora viridis	Kitasatospora	viridis	OK	Contig	97.98	4.89	10089953	6108630	73	9	MQ	PRJNA547281	SAMN12024999
GCF_007829925.1	Micromonospora palomenae	Micromonospora	palomenae	OK	Contig	96.26	2.56	6655188	2092086	73	8	MQ	PRJNA547283	SAMN12024693
GCF_007829955.1	Saccharopolyspora dendranthemae	Saccharopolyspora	dendranthemae	OK	Contig	97.51	2.49	6410624	1390797	69.5	8	MQ	PRJNA546938	SAMN12024781
GCF_007830095.1	Micromonospora taraxaci	Micromonospora	taraxaci	OK	Contig	97.94	3.34	7208813	6430673	71	2	MQ	PRJNA546937	SAMN12024906
GCF_007856155.1	Streptomyces qinzhouensis	Streptomyces	qinzhouensis	OK	Complete Genome	99.17	0.76	8146484	8146484	71.5	1	HQ	PRJNA557086	SAMN12389286
GCF_008306195.1	Rhodococcus qingshengii	Rhodococcus	qingshengii	OK	Complete Genome	99.59	0.5	6846621	6253838	62.5	3	HQ	PRJNA492450	SAMN10102370
GCF_008630535.1	Saccharopolyspora hirsuta	Saccharopolyspora	hirsuta	OK	Contig	100	1.16	7549392	504440	71.5	46	MQ	PRJNA564865	SAMN12725943
GCF_008639045.1	Streptomyces venezuelae	Streptomyces	venezuelae	OK	Complete Genome	99.91	0.95	7893803	7893803	72.5	1	HQ	PRJNA454547	SAMN09010086
GCF_008639165.1	Streptomyces venezuelae ATCC 10712	Streptomyces	venezuelae	OK	Complete Genome	99.91	0.95	8223505	8223505	72.5	1	HQ	PRJNA454547	SAMN09010085
GCF_008704395.1	Streptomyces alboniger	Streptomyces	alboniger	OK	Complete Genome	99.91	1.45	7962786	7962786	71	1	HQ	PRJNA412292	SAMN07709098
GCF_008704425.1	Streptomyces fradiae ATCC 10745 = DSM 40063	Streptomyces	fradiae	OK	Complete Genome	99.34	1.59	6725579	6725579	74.5	1	HQ	PRJNA412292	SAMN07709097
GCF_008704445.1	Streptomyces prasinus	Streptomyces	prasinus	OK	Complete Genome	99.91	0.59	7647592	7647592	72	1	HQ	PRJNA412292	SAMN07709095
GCF_008704495.1	Streptomyces kanamyceticus	Streptomyces	kanamyceticus	OK	Complete Genome	99.91	1.58	10133897	10133897	71	1	HQ	PRJNA412292	SAMN07709093
GCF_008704515.1	Streptomyces viridosporus T7A	Streptomyces	viridosporus	OK	Complete Genome	99.53	0.42	7280536	7280536	72.5	1	HQ	PRJNA412292	SAMN07709092
GCF_008704535.1	Streptomyces subrutilus	Streptomyces	subrutilus	OK	Complete Genome	99.53	0.69	7604974	7604974	73.5	1	HQ	PRJNA412292	SAMN07709091
GCF_008704555.1	Streptomyces nitrosporeus	Streptomyces	nitrosporeus	OK	Complete Genome	99.85	0.41	7581562	7581562	72	1	HQ	PRJNA412292	SAMN07709090
GCF_008704575.1	Streptomyces galilaeus	Streptomyces	galilaeus	OK	Complete Genome	100	0	7756194	7756194	71.5	1	HQ	PRJNA412292	SAMN07709089
GCF_008704655.1	Streptomyces rimosus	Streptomyces	rimosus	OK	Complete Genome	99.62	1.86	9361154	9361154	72	1	HQ	PRJNA412292	SAMN07709107
GCF_008704715.1	Streptomyces chartreusis	Streptomyces	chartreusis	OK	Complete Genome	100	0.13	9912098	9912098	71	1	HQ	PRJNA412292	SAMN07709106
GCF_008704795.1	Streptomyces spectabilis	Streptomyces	spectabilis	OK	Complete Genome	99.15	0.88	9807160	9807160	72.5	1	HQ	PRJNA412292	SAMN07709105
GCF_008704855.1	Streptomyces platensis	Streptomyces	platensis	OK	Complete Genome	99.46	0.38	8501012	8501012	71	1	HQ	PRJNA412292	SAMN07709104
GCF_008704935.1	Streptomyces vinaceus	Streptomyces	vinaceus	OK	Complete Genome	99.89	0.95	7673509	7673509	72.5	1	HQ	PRJNA412292	SAMN07709103
GCF_008704995.1	Streptomyces nodosus	Streptomyces	nodosus	OK	Complete Genome	99.91	3.16	7772587	7772587	71	1	HQ	PRJNA412292	SAMN07709101
GCF_008705135.1	Streptomyces coeruleorubidus	Streptomyces	coeruleorubidus	OK	Complete Genome	100	0	9335698	9335698	71	1	HQ	PRJNA412292	SAMN07709099
GCF_008705255.1	Streptomyces venezuelae	Streptomyces	venezuelae	OK	Complete Genome	99.91	1.18	7871480	7871480	72.5	1	HQ	PRJNA454547	SAMN09010087
GCF_009184865.1	Streptomyces phaeolivaceus	Streptomyces	phaeolivaceus	OK	Complete Genome	99.91	1.04	10175440	10116136	71	2	HQ	PRJNA576310	SAMN12989728
GCF_009299385.1	Streptomyces cinereoruber	Streptomyces	cinereoruber	OK	Complete Genome	99.62	0.8	7516652	7516652	73	1	HQ	PRJNA412292	SAMN07709100
GCF_009429145.1	Amycolatopsis sp. YIM 10	Amycolatopsis	sp.	OK	Complete Genome	97.82	3.77	10352908	10312959	70.5	2	HQ	PRJNA576873	SAMN13012137
GCF_009495655.1	Streptomyces sp. SYP-A7193	Streptomyces	sp.	OK	Complete Genome	100	0.13	8822782	8193527	72	3	HQ	PRJNA579270	SAMN13107518
GCF_009498035.1	Saccharothrix syringae	Saccharothrix	syringae	OK	Complete Genome	98.01	3.17	10929570	10929570	73.5	1	HQ	PRJNA510219	SAMN10600592
GCF_009498275.1	Streptomyces fagopyri	Streptomyces	fagopyri	OK	Complete Genome	99.95	2.05	8880330	8880330	71	1	HQ	PRJNA579795	SAMN13133865
GCF_009650765.1	Streptomyces sp. SUK 48	Streptomyces	sp.	OK	Complete Genome	97.63	0.85	8341671	8341671	72.5	1	HQ	PRJNA587018	SAMN11665303
GCF_009707425.1	Micromonospora sp. WMMC415	Micromonospora	sp.	OK	Chromosome	91.75	3.04	6281187	6281087	73	1	HQ	PRJNA589828	SAMN13291798
GCF_009789635.1	Streptomyces sp. QHH-9511	Streptomyces	sp.	OK	Complete Genome	98.04	0.85	7615276	7524079	71.5	2	HQ	PRJNA595049	SAMN13545208
GCF_009796285.1	Streptomyces broussonetiae	Streptomyces	broussonetiae	OK	Complete Genome	99.81	1.14	9735779	9735779	71	1	HQ	PRJNA595585	SAMN13560631
GCF_009832925.1	Streptomyces sp. Tu 2975	Streptomyces	sp.	OK	Complete Genome	91.14	0.38	7623788	7623788	71	1	HQ	PRJNA590865	SAMN13341645
GCF_009834105.1	Streptomyces sp. GF20	Streptomyces	sp.	OK	Complete Genome	99.43	0.88	7311137	7311137	73.5	1	HQ	PRJNA597612	SAMN13679251
GCF_009834125.1	Streptomyces sp. GS7	Streptomyces	sp.	OK	Complete Genome	99.91	1.71	9067183	9067183	71.5	1	HQ	PRJNA597611	SAMN13679250
GCF_009834145.1	Streptomyces sp. HF10	Streptomyces	sp.	OK	Complete Genome	97.05	0.06	7906239	7814787	72	2	HQ	PRJNA597610	SAMN13679248
GCF_009857135.1	Streptomyces sp. HM190	Streptomyces	sp.	OK	Complete Genome	99.49	1.33	7762826	7762826	72	1	HQ	PRJNA598787	SAMN13716042
GCF_009859915.1	Rhodococcus sp. WAY2	Rhodococcus	sp.	OK	Complete Genome	98.44	2.4	8443333	6622033	65.5	5	HQ	PRJNA580179	SAMN13151932
GCF_009867075.1	Streptomyces sp. NHF165	Streptomyces	sp.	OK	Complete Genome	97.95	0.95	8457300	8457300	73.5	1	HQ	PRJNA454511	SAMN09009548
GCF_009883715.1	Rhodococcus rhodochrous	Rhodococcus	rhodochrous	OK	Complete Genome	99	1.23	5903823	5370536	68	2	HQ	PRJNA487734	SAMN09909133
GCF_009908295.1	Micromonospora rubida	Micromonospora	rubida	OK	Scaffold	95.61	4.77	7473813	463225	73	44	MQ	PRJNA600760	SAMN13831090
GCF_010384365.1	Streptomyces sp. S4.7	Streptomyces	sp.	OK	Complete Genome	99.34	1.04	7940295	7920066	70.5	3	HQ	PRJNA603981	SAMN13945026
GCF_011006355.1	Streptomyces albus	Streptomyces	albus	OK	Complete Genome	97.92	0.57	8069210	8069210	72.5	1	HQ	PRJNA605965	SAMN14082737
GCF_011193355.1	Streptomyces sp. JB150	Streptomyces	sp.	OK	Chromosome	100	0.39	7318937	596542	72.5	22	HQ	PRJNA609637	SAMN14257088
GCF_011290345.1	Streptomyces sp. ID38640	Streptomyces	sp.	OK	Chromosome	99.84	0.71	8790195	952631	71	30	HQ	PRJNA609626	SAMN14256955
GCF_011290655.1	Rhodococcus sp. D-46	Rhodococcus	sp.	OK	Scaffold	99.52	0.28	7121435	516150	62.5	49	MQ	PRJNA611478	SAMN14332343
GCF_011650445.1	Streptomyces sp. VN1	Streptomyces	sp.	OK	Complete Genome	100	0	8341703	8341703	72.5	1	HQ	PRJNA524418	SAMN11026397
GCF_011694815.1	Streptomyces liangshanensis	Streptomyces	liangshanensis	OK	Complete Genome	99.62	1.12	7716784	7716784	72	1	HQ	PRJNA612604	SAMN14378433
GCF_011751035.2	Streptomyces sp. MBT27	Streptomyces	sp.	OK	Complete Genome	99.62	1.1	8530179	8400223	71	2	HQ	PRJNA602665	SAMN13901100
GCF_011758745.1	Amycolatopsis granulosa	Amycolatopsis	granulosa	OK	Contig	98.23	0.5	5623989	5623989	72	1	MQ	PRJNA547253	SAMN12025003
GCF_011758765.1	Amycolatopsis viridis	Amycolatopsis	viridis	OK	Contig	98.07	0.77	5684261	5684261	72	1	MQ	PRJNA547254	SAMN12024690
GCF_011761605.1	Kribbella shirazensis	Kribbella	shirazensis	OK	Contig	97.24	2.94	8596726	8596726	69	1	MQ	PRJNA345952	SAMN05878102
GCF_011820545.1	Streptomyces sp. DSM 40868	Streptomyces	sp.	OK	Complete Genome	100	1.84	9195693	9195693	72	1	HQ	PRJNA613828	SAMN14420264
GCF_011927785.1	Micromonospora profundi	Micromonospora	profundi	OK	Contig	96.86	4.5	6933450	6933450	71	1	MQ	PRJNA566821	SAMN12793208
GCF_012272955.1	Rhodococcus sp. DMU1	Rhodococcus	sp.	OK	Complete Genome	99.52	0.7	6835256	6119238	70	2	HQ	PRJNA616208	SAMN14484670
GCF_012273495.1	Streptomyces sp. RPA4-5	Streptomyces	sp.	OK	Chromosome	97.22	0.19	9051652	6460961	71	2	HQ	PRJNA615323	SAMN14450782
GCF_012273515.2	Streptomyces sp. RPA4-2	Streptomyces	sp.	OK	Complete Genome	97.98	0.63	9860181	9860181	71	1	HQ	PRJNA615323	SAMN14450781
GCF_012277335.1	Saccharopolyspora sp. ASAGF58	Saccharopolyspora	sp.	OK	Complete Genome	100	1.78	8045912	8045912	68	1	HQ	PRJNA534337	SAMN11488380
GCF_012396055.1	Nocardia gamkensis	Nocardia	gamkensis	OK	Contig	98.75	2.6	7728041	412236	68.5	50	MQ	PRJNA622446	SAMN14517873
GCF_012396065.1	Nocardia cerradoensis	Nocardia	cerradoensis	OK	Contig	98.83	1.97	7635786	929033	68	10	MQ	PRJNA622446	SAMN14517874
GCF_012726205.1	Rhodococcus sp. HNM0569	Rhodococcus	sp.	OK	Contig	97.86	1.27	4408839	291915	69	47	MQ	PRJNA613582	SAMN14309757
GCF_012843405.1	Rhodococcus sp. BL-253-APC-6A1W	Rhodococcus	sp.	OK	Contig	96.69	0.99	4539124	377260	67.5	38	MQ	PRJNA561470	SAMN14558279
GCF_012844225.1	Rhodococcus sp. 105337	Rhodococcus	sp.	OK	Contig	96.69	0.5	4461775	302023	67.5	35	MQ	PRJNA561470	SAMN14558311
GCF_012931745.1	Rhodococcus opacus	Rhodococcus	opacus	OK	Chromosome	99.59	2.44	9083541	7849285	67	2	HQ	PRJNA627025	SAMN14650034
GCF_013009255.1	Streptomyces sp. Z423-1	Streptomyces	sp.	OK	Complete Genome	100	1.55	9460473	9460473	71	1	HQ	PRJNA628182	SAMN14732752
GCF_013277795.1	Rhodococcus sp. MS16	Rhodococcus	sp.	OK	Scaffold	98.81	0.48	6965470	566923	61.5	40	MQ	PRJNA514341	SAMN10724082
GCF_013277835.1	Rhodococcus sp. MS13	Rhodococcus	sp.	OK	Scaffold	99.59	0.66	6454906	552637	62.5	28	MQ	PRJNA514341	SAMN10724081
GCF_013364075.1	Amycolatopsis sp. Hca4	Amycolatopsis	sp.	OK	Complete Genome	97.17	1.02	10972864	10972864	71.5	1	HQ	PRJNA636927	SAMN15090289
GCF_013364095.1	Streptomyces harbinensis	Streptomyces	harbinensis	OK	Complete Genome	96.69	1.2	5802668	5802668	73	1	HQ	PRJNA636927	SAMN15090292
GCF_013364155.1	Streptomyces sp. NA02950	Streptomyces	sp.	OK	Complete Genome	100	1.86	9771669	9619720	71	2	HQ	PRJNA636927	SAMN15090298
GCF_013364175.1	Streptomyces sp. NA02536	Streptomyces	sp.	OK	Complete Genome	99.53	0.95	7707218	7707218	72	1	HQ	PRJNA636927	SAMN15090293
GCF_013364195.1	Streptomyces sp. NA04227	Streptomyces	sp.	OK	Complete Genome	99.08	0.23	7894562	7894562	71	1	HQ	PRJNA636927	SAMN15090297
GCF_013364235.1	Kitasatospora sp. NA04385	Kitasatospora	sp.	OK	Complete Genome	97.16	2.6	8400742	8400742	74	1	HQ	PRJNA636927	SAMN15090295
GCF_013364315.1	Streptomyces microflavus	Streptomyces	microflavus	OK	Complete Genome	99.91	0.3	8452583	7790974	71.5	3	HQ	PRJNA636927	SAMN15090288
GCF_013364335.1	Streptomyces buecherae	Streptomyces	buecherae	OK	Complete Genome	97.29	0.6	9093530	9069632	73	2	HQ	PRJNA636927	SAMN15090287
GCF_013364375.1	Streptomyces sp. NA03103	Streptomyces	sp.	OK	Complete Genome	100	0	8359435	8088762	72	3	HQ	PRJNA636927	SAMN15090294
GCF_013375055.1	Streptomyces chartreusis	Streptomyces	chartreusis	OK	Complete Genome	99.62	1.77	11234141	11234141	70.5	1	HQ	PRJNA636927	SAMN15090284
GCF_013401535.1	Streptomyces sp. CB04723	Streptomyces	sp.	OK	Complete Genome	99.15	0.38	7872196	7872196	72.5	1	HQ	PRJNA642344	SAMN15394189
GCF_013408715.1	Pseudonocardia antarctica	Pseudonocardia	antarctica	OK	Contig	93.16	3.94	6242493	5989168	74	2	MQ	PRJNA616585	SAMN14503169
GCF_013410185.1	Micromonospora purpureochromogenes	Micromonospora	purpureochromogenes	OK	Contig	96.08	3.51	6598271	6598271	73	1	MQ	PRJNA616583	SAMN14502797
GCF_013410345.1	Saccharopolyspora hordei	Saccharopolyspora	hordei	OK	Contig	100	1	5783988	5783988	72.5	1	MQ	PRJNA632331	SAMN14908465
GCF_013410645.1	Micromonospora jinlongensis	Micromonospora	jinlongensis	OK	Contig	97.97	2.14	6825366	6825366	71.5	1	MQ	PRJNA632285	SAMN14908532
GCF_013414305.1	Streptomyces sp. Rer75	Streptomyces	sp.	OK	Complete Genome	99.09	0.69	10474412	10474412	71.5	1	HQ	PRJNA644027	SAMN15446430
GCF_013423905.1	Streptomyces sp. NEAU-sy36	Streptomyces	sp.	OK	Complete Genome	99.81	3.5	8557534	8429941	72.5	4	HQ	PRJNA645088	SAMN15491938
GCF_013602415.1	Rhodococcus sp. B50	Rhodococcus	sp.	OK	Contig	99.52	0.33	6157152	5278615	67.5	3	MQ	PRJNA593665	SAMN13483355
GCF_013694245.2	Micromonospora ferruginea	Micromonospora	ferruginea	OK	Complete Genome	96.26	2.06	6701061	6701061	73.5	1	HQ	PRJNA643671	SAMN15423286
GCF_013744875.1	Nocardia huaxiensis	Nocardia	huaxiensis	OK	Complete Genome	97.53	3.51	8339910	8339910	68	1	HQ	PRJNA646810	SAMN15566273
GCF_014083985.1	Streptomyces sp. SCUT-3	Streptomyces	sp.	OK	Complete Genome	92.75	1.42	6075149	6075149	74	1	HQ	PRJNA595069	SAMN13545479
GCF_014117305.1	Nocardia seriolae	Nocardia	seriolae	OK	Chromosome	96.34	4.5	8262537	8262437	68	1	HQ	PRJNA649056	SAMN15656457
GCF_014138705.1	Rhodococcus opacus	Rhodococcus	opacus	OK	Contig	99.59	1.52	7822575	2188558	67.5	6	MQ	PRJNA334662	SAMN05445745
GCF_014191255.1	Amycolatopsis bartoniae	Amycolatopsis	bartoniae	OK	Contig	98.23	1.88	7757008	958450	71	23	MQ	PRJNA547290	SAMN12024902
GCF_014201145.1	Micromonospora parathelypteridis	Micromonospora	parathelypteridis	OK	Contig	97.24	2.82	7014531	7014531	71	1	MQ	PRJNA632283	SAMN14908347
GCF_014203315.1	Nocardia transvalensis	Nocardia	transvalensis	OK	Contig	98.57	4.76	8398323	4471876	69	3	MQ	PRJNA345954	SAMN05878101
GCF_014203325.1	Saccharopolyspora gloriosae	Saccharopolyspora	gloriosae	OK	Contig	99.75	1.16	6825909	6825909	71	1	MQ	PRJNA347099	SAMN05878036
GCF_014203395.1	Saccharopolyspora phatthalungensis	Saccharopolyspora	phatthalungensis	OK	Contig	100	3.48	8541735	5889697	67.5	6	MQ	PRJNA347100	SAMN05878392
GCF_014203665.1	Saccharothrix tamanrassetensis	Saccharothrix	tamanrassetensis	OK	Scaffold	100	0.5	8053586	696116	71.5	34	MQ	PRJNA546730	SAMN12025052
GCF_014203705.1	Kitasatospora gansuensis	Kitasatospora	gansuensis	OK	Contig	98.11	2.38	8296669	8212083	72	3	MQ	PRJNA566819	SAMN12793121
GCF_014203755.1	Saccharothrix violaceirubra	Saccharothrix	violaceirubra	OK	Contig	98.51	1.24	7354386	7354386	71.5	1	MQ	PRJNA566822	SAMN12793293
GCF_014203855.1	Kitasatospora kifunensis	Kitasatospora	kifunensis	OK	Contig	98.37	2.07	9567486	7732878	71.5	4	MQ	PRJNA546635	SAMN12025023
GCF_014204865.1	Amycolatopsis jiangsuensis	Amycolatopsis	jiangsuensis	OK	Contig	98.9	1.77	8047834	8045121	70.5	2	MQ	PRJNA345948	SAMN05878110
GCF_014205015.1	Saccharothrix ecbatanensis	Saccharothrix	ecbatanensis	OK	Contig	100	2.26	9689237	9689237	70	1	MQ	PRJNA566823	SAMN12793268
GCF_014205135.1	Kribbella italica	Kribbella	italica	OK	Contig	97.73	3.78	8885108	8885108	69.5	1	MQ	PRJNA616587	SAMN14503048
GCF_014205155.1	Amycolatopsis umgeniensis	Amycolatopsis	umgeniensis	OK	Contig	98.75	0.92	9225930	9225930	68.5	1	MQ	PRJNA616593	SAMN14502812
GCF_014205295.1	Kribbella solani	Kribbella	solani	OK	Contig	98.25	3.78	7851691	7810665	68	2	MQ	PRJNA616592	SAMN14502711
GCF_014207795.1	Kribbella sandramycini	Kribbella	sandramycini	OK	Contig	99.93	4.62	8120153	8120153	69	1	MQ	PRJNA632334	SAMN14908545
GCF_014216335.1	Streptomyces rutgersensis	Streptomyces	rutgersensis	OK	Complete Genome	99.24	0.19	6996347	6848830	73.5	2	HQ	PRJNA554385	SAMN12282934
GCF_014217585.1	Streptomyces sp. INR7	Streptomyces	sp.	OK	Complete Genome	100	0.95	8320846	8320846	72.5	1	HQ	PRJNA554385	SAMN12282935
GCF_014230025.1	Rhodococcus aetherivorans	Rhodococcus	aetherivorans	OK	Contig	99.16	1.03	6586891	4181179	70	6	MQ	PRJNA644947	SAMN15495700
GCF_014230115.1	Rhodococcus sp. 3A	Rhodococcus	sp.	OK	Contig	98.86	3.05	8742699	7733895	67	8	MQ	PRJNA644947	SAMN15732854
GCF_014267175.1	Pseudonocardia sp. C8	Pseudonocardia	sp.	OK	Contig	93.88	4.32	6241701	6107128	73.5	2	MQ	PRJNA657162	SAMN15817296
GCF_014295035.1	Streptomyces buecherae	Streptomyces	buecherae	OK	Complete Genome	98.3	0.22	8416829	8416829	73	1	HQ	PRJNA656727	SAMN15800794
GCF_014489615.1	Streptomyces genisteinicus	Streptomyces	genisteinicus	OK	Complete Genome	99.81	0.51	8188347	7631890	73.5	3	HQ	PRJNA659886	SAMN15929990
GCF_014489635.1	Streptomyces roseirectus	Streptomyces	roseirectus	OK	Complete Genome	100	0.61	9947447	9947447	72	1	HQ	PRJNA659888	SAMN15930037
GCF_014495705.1	Streptomyces sp. CB00271	Streptomyces	sp.	OK	Complete Genome	99.12	0.76	8309852	8309852	71.5	1	HQ	PRJNA643402	SAMN15414047
GCF_014621695.1	Streptomyces xanthii	Streptomyces	xanthii	OK	Complete Genome	99.53	1.14	8354710	7867709	72	3	HQ	PRJNA659883	SAMN15929880
GCF_014646135.1	Nocardia camponoti	Nocardia	camponoti	OK	Scaffold	96.96	1.61	5214713	1501627	65	18	MQ	PRJDB10509	SAMD00245191
GCF_014646295.1	Nocardia rhizosphaerihabitans	Nocardia	rhizosphaerihabitans	OK	Scaffold	98.95	3.73	7679796	558987	68.5	33	MQ	PRJDB10509	SAMD00245201
GCF_014648415.1	Actinokineospora fastidiosa	Actinokineospora	fastidiosa	OK	Scaffold	100	1.24	7042850	1778554	72.5	30	MQ	PRJDB10510	SAMD00245342
GCF_014673495.1	Streptomyces griseofuscus	Streptomyces	griseofuscus	OK	Complete Genome	99.91	0.6	9116672	8721740	71.5	4	HQ	PRJNA622435	SAMN14516928
GCF_014701095.1	Streptomyces tuirus	Streptomyces	tuirus	OK	Complete Genome	99.91	0.38	7561001	7561001	71.5	1	HQ	PRJDB10510	SAMD00245407
GCF_014701115.1	Streptomyces aurantiacus	Streptomyces	aurantiacus	OK	Complete Genome	99.46	0.76	9428393	9428393	70.5	1	HQ	PRJDB10510	SAMD00245496
GCF_014852565.2	Streptomyces caniscabiei	Streptomyces	caniscabiei	OK	Complete Genome	99.62	1.89	10262635	10262635	71	1	HQ	PRJNA662381	SAMN16083672
GCF_014854695.1	Rhodococcus rhodochrous	Rhodococcus	rhodochrous	OK	Complete Genome	99.11	0.91	6088302	5459556	67.5	4	HQ	PRJNA437182	SAMN08640849
GCF_014873755.1	Amycolatopsis lexingtonensis	Amycolatopsis	lexingtonensis	OK	Contig	99.06	1.52	10737921	10737921	71.5	1	MQ	PRJNA655106	SAMN15738796
GCF_014873915.1	Amycolatopsis roodepoortensis	Amycolatopsis	roodepoortensis	OK	Contig	99	4.21	9113087	1990285	69	8	MQ	PRJNA652998	SAMN15739642
GCF_015034605.1	Rhodococcus qingshengii	Rhodococcus	qingshengii	OK	Complete Genome	96.87	0.08	6798722	6278280	62.5	3	HQ	PRJNA669224	SAMN16450133
GCF_015160855.1	Streptomyces ferrugineus	Streptomyces	ferrugineus	OK	Complete Genome	99.81	0.77	9959088	9959088	71	1	HQ	PRJNA669217	SAMN16442761
GCF_015160875.1	Streptomyces chromofuscus	Streptomyces	chromofuscus	OK	Complete Genome	99.43	0.19	7483282	7483282	71.5	1	HQ	PRJNA669217	SAMN16442616
GCF_015244315.1	Streptomyces olivaceus	Streptomyces	olivaceus	OK	Complete Genome	99.53	0	8458055	8458055	72.5	1	HQ	PRJNA561678	SAMN12624129
GCF_015355705.1	Nocardia sp. XZ_19_231	Nocardia	sp.	OK	Contig	98.78	2.94	7432816	1175309	67	28	MQ	PRJNA661029	SAMN15967262
GCF_015355755.1	Nocardia sp. XZ_19_385	Nocardia	sp.	OK	Contig	99.05	4.07	7997497	2382347	67	24	MQ	PRJNA661207	SAMN16048119
GCF_015477295.1	Nocardia otitidiscaviarum	Nocardia	otitidiscaviarum	OK	Contig	97.46	4.2	7697066	929674	69	46	MQ	PRJNA671788	SAMN16551454
GCF_015477525.1	Nocardia farcinica	Nocardia	farcinica	OK	Contig	99.33	2.69	6311149	663937	70.5	43	MQ	PRJNA671788	SAMN16551439
GCF_015477685.1	Nocardia farcinica	Nocardia	farcinica	OK	Contig	99.84	2.93	6304437	901146	71	42	MQ	PRJNA671788	SAMN16551428
GCF_015477705.1	Nocardia cyriacigeorgica	Nocardia	cyriacigeorgica	OK	Contig	99.51	1.83	6695080	579911	68	39	MQ	PRJNA671788	SAMN16551424
GCF_015477725.1	Nocardia cyriacigeorgica	Nocardia	cyriacigeorgica	OK	Contig	99.19	1.7	6577733	1114157	68	34	MQ	PRJNA671788	SAMN16551426
GCF_015477865.1	Nocardia cyriacigeorgica	Nocardia	cyriacigeorgica	OK	Contig	99.06	1.76	6324861	494265	68.5	31	MQ	PRJNA671788	SAMN16551421
GCF_015477875.1	Nocardia farcinica	Nocardia	farcinica	OK	Contig	99.73	2.11	6158136	816125	71	45	MQ	PRJNA671788	SAMN16551419
GCF_015477925.1	Nocardia farcinica	Nocardia	farcinica	OK	Contig	99.87	2.27	6396091	703830	70.5	38	MQ	PRJNA671788	SAMN16551416
GCF_015477945.1	Nocardia cyriacigeorgica	Nocardia	cyriacigeorgica	OK	Contig	99.51	1.85	6428271	1313346	68	18	MQ	PRJNA671788	SAMN16551414
GCF_015477995.1	Nocardia cyriacigeorgica	Nocardia	cyriacigeorgica	OK	Contig	99.16	0.55	6152653	637687	68.5	44	MQ	PRJNA671788	SAMN16551413
GCF_015478145.1	Nocardia puris	Nocardia	puris	OK	Contig	97.97	2.06	6962274	587770	70	23	MQ	PRJNA671788	SAMN16551405
GCF_015478225.1	Nocardia elegans	Nocardia	elegans	OK	Contig	94.32	1.79	6505753	405992	68	19	MQ	PRJNA671788	SAMN16551400
GCF_015478245.1	Nocardia abscessus	Nocardia	abscessus	OK	Contig	98.55	2.46	7219879	522663	68.5	25	MQ	PRJNA671788	SAMN16551399
GCF_015478255.1	Nocardia cyriacigeorgica	Nocardia	cyriacigeorgica	OK	Contig	98.6	0.49	5915323	315496	68.5	25	MQ	PRJNA671788	SAMN16551397
GCF_015478355.1	Nocardia farcinica	Nocardia	farcinica	OK	Contig	99.6	2.07	6178698	269024	71	44	MQ	PRJNA671788	SAMN16551390
GCF_015678935.1	Rhodococcus qingshengii	Rhodococcus	qingshengii	OK	Chromosome	99.25	0	6251765	675127	62.5	16	HQ	PRJNA673759	SAMN16622803
GCF_015710995.1	Streptomyces gardneri	Streptomyces	gardneri	OK	Complete Genome	99.91	0.62	9054805	9054805	71.5	1	HQ	PRJNA652810	SAMN15719277
GCF_015751765.1	Micromonospora ureilytica	Micromonospora	ureilytica	OK	Contig	97.32	3.22	7096270	7096270	71	1	MQ	PRJNA677779	SAMN16773313
GCF_015751785.1	Micromonospora vinacea	Micromonospora	vinacea	OK	Contig	98.71	2.68	7340502	7340502	71	1	MQ	PRJNA677780	SAMN16773024
GCF_015767935.1	Streptomyces clavuligerus	Streptomyces	clavuligerus	OK	Complete Genome	99.62	0.76	7583174	6862413	72.5	2	HQ	PRJNA679975	SAMN16868785
GCF_015910445.1	Streptomyces bathyalis	Streptomyces	bathyalis	OK	Complete Genome	99.89	0.85	7377472	7377472	70	1	HQ	PRJNA607178	SAMN14123578
GCF_016128295.1	Streptomyces alfalfae	Streptomyces	alfalfae	OK	Complete Genome	99.53	0.2	8856609	8856609	72	1	HQ	PRJNA683947	SAMN17048570
GCF_016467295.1	Streptomyces murinus	Streptomyces	murinus	OK	Complete Genome	99.91	1.36	8539264	8539264	72	1	HQ	PRJNA650019	SAMN17132230
GCF_016526145.1	Saccharopolyspora sp. HNM0986	Saccharopolyspora	sp.	OK	Scaffold	99.49	1.08	6397171	406614	70.5	35	MQ	PRJNA670080	SAMN16483406
GCF_016598535.1	Rhodococcus sp. P-2	Rhodococcus	sp.	OK	Chromosome	99.19	0.33	6340135	3593197	62.5	4	HQ	PRJNA682861	SAMN17013013
GCF_016598575.1	Streptomyces sp. HSG2	Streptomyces	sp.	OK	Complete Genome	97.82	1.01	5282528	5282528	72	1	HQ	PRJNA685641	SAMN17088907
GCF_016598615.1	Streptomyces liliifuscus	Streptomyces	liliifuscus	OK	Complete Genome	99.46	0.88	11347200	11027222	70	2	HQ	PRJNA685923	SAMN17100608
GCF_016598695.1	Rhodococcus pyridinivorans	Rhodococcus	pyridinivorans	OK	Complete Genome	96.91	3.49	5078695	4944495	68	2	HQ	PRJNA687595	SAMN17150706
GCF_016605905.1	Streptomyces sp. XC 2026	Streptomyces	sp.	OK	Complete Genome	93.33	0.13	5836896	5836896	72	1	HQ	PRJNA672261	SAMN16561804
GCF_016695385.1	Saccharothrix sp. 6-C	Saccharothrix	sp.	OK	Complete Genome	99.9	0.91	9045220	9045220	72.5	1	HQ	PRJNA671555	SAMN16534143
GCF_016722835.1	Rhodococcus qingshengii	Rhodococcus	qingshengii	OK	Complete Genome	99.13	1.72	7015998	6313455	62.5	4	HQ	PRJNA691755	SAMN17305290
GCF_016772255.1	Rhodococcus sp. 21391	Rhodococcus	sp.	OK	Chromosome	99.17	2.29	9422906	7465715	67	4	HQ	PRJNA594282	SAMN13510402
GCF_016803985.1	Streptomyces koyangensis	Streptomyces	koyangensis	OK	Complete Genome	99.08	0.25	7001532	6861301	73.5	2	HQ	PRJNA611490	SAMN14342208
GCF_016804345.1	Rhodococcus ruber	Rhodococcus	ruber	OK	Complete Genome	99.44	0.33	5698851	5488044	70.5	3	HQ	PRJNA564912	SAMN12726376
GCF_016839185.1	Rhodococcus aetherivorans	Rhodococcus	aetherivorans	OK	Complete Genome	98.78	0.78	6264215	6101079	70.5	2	HQ	PRJNA610894	SAMN14323055
GCF_016859185.1	Saccharopolyspora erythraea	Saccharopolyspora	erythraea	OK	Complete Genome	99.5	0.5	8305652	8305652	71	1	HQ	PRJNA699044	SAMN17765490
GCF_016889705.1	Amycolatopsis sp. FDAARGOS 1241	Amycolatopsis	sp.	OK	Complete Genome	98.83	2.63	9798102	9796944	70.5	2	HQ	PRJNA231221	SAMN16357383
GCF_016906185.1	Streptomyces californicus	Streptomyces	californicus	OK	Complete Genome	100	0.38	8031696	7814960	72.5	3	HQ	PRJNA231221	SAMN16357351
GCF_016906205.1	Streptomyces californicus	Streptomyces	californicus	OK	Complete Genome	100	0.38	8082614	7788344	72.5	5	HQ	PRJNA231221	SAMN16357354
GCF_016906265.1	Streptomyces californicus	Streptomyces	californicus	OK	Complete Genome	99.91	0.88	8221537	7919564	72.5	3	HQ	PRJNA231221	SAMN16357352
GCF_016907695.1	Actinokineospora baliensis	Actinokineospora	baliensis	OK	Contig	100	2.4	7681387	7681387	70.5	1	MQ	PRJNA695672	SAMN17620041
GCF_016917755.1	Streptomyces noursei	Streptomyces	noursei	OK	Complete Genome	99.72	2.29	9857535	9857535	71.5	1	HQ	PRJNA695034	SAMN17611880
GCF_017068035.1	Rhodococcus erythropolis	Rhodococcus	erythropolis	OK	Complete Genome	95.52	1.09	6324063	6237791	62.5	2	HQ	PRJNA703051	SAMN18010187
GCF_017068295.1	Rhodococcus sp. PSBB049	Rhodococcus	sp.	OK	Chromosome	98.81	0.78	6592310	6080861	70	4	HQ	PRJNA610894	SAMN17925404
GCF_017068395.1	Rhodococcus pseudokoreensis	Rhodococcus	pseudokoreensis	OK	Complete Genome	99.45	3.24	9866560	8730774	67.5	6	HQ	PRJNA700828	SAMN17840530
GCF_017305975.1	Pseudonocardia sp.	Pseudonocardia	sp.	OK	Contig	97.28	3.86	6925357	401818	72.5	39	MQ	PRJNA629336	SAMN18061428
GCF_017309385.1	Amycolatopsis sp. 195334CR	Amycolatopsis	sp.	OK	Contig	97.38	4.45	9926854	3091471	71	8	MQ	PRJNA704519	SAMN18043444
GCF_017311125.1	Streptomyces sp. M54	Streptomyces	sp.	OK	Complete Genome	99.62	0.45	7958870	7767664	72.5	2	HQ	PRJNA649360	SAMN15664621
GCF_017312155.1	Pseudonocardia sp. UM4_GMWB1	Pseudonocardia	sp.	OK	Contig	94.05	4.92	6360592	5869311	74	9	MQ	PRJNA474213	SAMN09294476
GCF_017358145.1	Streptomyces sp. CA-256286	Streptomyces	sp.	OK	Complete Genome	98.9	0.42	8193177	7726360	71.5	2	HQ	PRJNA689435	SAMN17208717
GCF_017639205.1	Streptomyces nojiriensis	Streptomyces	nojiriensis	OK	Complete Genome	99.95	0.99	9022916	9022916	72	1	HQ	PRJNA704480	SAMN18042962
GCF_017656075.1	Rhodococcus sp. ZPP	Rhodococcus	sp.	OK	Complete Genome	99.52	2.3	8473046	6783648	65.5	6	HQ	PRJNA643244	SAMN15407333
GCF_017795725.1	Rhodococcus qingshengii	Rhodococcus	qingshengii	OK	Complete Genome	98.92	0.73	7479539	6511628	62.5	5	HQ	PRJNA636212	SAMN13973197
GCF_017833315.1	Rhodococcus sp. PvR099	Rhodococcus	sp.	OK	Contig	99.05	3.61	5690814	5690814	69	1	MQ	PRJNA695755	SAMN17693820
GCF_017872985.1	Micromonospora sp. HB375	Micromonospora	sp.	OK	Contig	97.91	3.83	7092790	7092790	72.5	1	MQ	PRJNA713132	SAMN18259638
GCF_017875555.1	Amycolatopsis magusensis	Amycolatopsis	magusensis	OK	Contig	98.32	1.74	9443615	9443615	70.5	1	MQ	PRJNA697199	SAMN17674413
GCF_017875715.1	Rhodococcus ruber	Rhodococcus	ruber	OK	Contig	99.44	0.4	5620386	5474927	70.5	2	MQ	PRJNA696867	SAMN17675906
GCF_017876295.1	Kribbella aluminosa	Kribbella	aluminosa	OK	Contig	97.23	2.52	8936317	4511420	68.5	2	MQ	PRJNA696029	SAMN17673473
GCF_017876325.1	Saccharothrix coeruleofusca	Saccharothrix	coeruleofusca	OK	Contig	100	1.49	7778610	7721092	72.5	2	MQ	PRJNA696063	SAMN17673432
GCF_017876985.1	Rhodococcus sp. PvP104	Rhodococcus	sp.	OK	Contig	99.59	1.06	7023435	6484758	62.5	6	MQ	PRJNA711007	SAMN18260143
GCF_017910955.1	Rhodococcus qingshengii	Rhodococcus	qingshengii	OK	Complete Genome	99.59	0	6413770	6290587	62.5	2	HQ	PRJNA702129	SAMN17925659
GCF_017916235.1	Rhodococcus opacus	Rhodococcus	opacus	OK	Chromosome	99.5	2.3	8000761	7587812	67.5	21	HQ	PRJNA603644	SAMN13939703
GCF_017916255.1	Streptomyces mobaraensis NBRC 13819 = DSM 40847	Streptomyces	mobaraensis	OK	Complete Genome	99.48	2.07	7574085	7574085	73	1	HQ	PRJNA718430	SAMN18533550
GCF_017933115.1	Streptomyces sp. LBUM 1482	Streptomyces	sp.	OK	Complete Genome	98.27	0.76	9782455	9782455	71.5	1	HQ	PRJNA565021	SAMN12730705
GCF_017933235.1	Streptomyces sp. LBUM 1480	Streptomyces	sp.	OK	Complete Genome	96.74	0.76	9982980	9982980	71.5	1	HQ	PRJNA565021	SAMN12730703
GCF_017933255.1	Streptomyces sp. LBUM 1475	Streptomyces	sp.	OK	Complete Genome	98.61	0.76	9741971	9741971	71.5	1	HQ	PRJNA565021	SAMN12730698
GCF_018069625.1	Streptomyces yatensis	Streptomyces	yatensis	OK	Complete Genome	99.72	0.76	10360357	10360357	71.5	1	HQ	PRJNA719702	SAMN18614723
GCF_018070075.1	Saccharopolyspora endophytica	Saccharopolyspora	endophytica	OK	Contig	100	1.66	7167017	363995	70	34	MQ	PRJNA721295	SAMN18713782
GCF_018070525.1	Micromonospora sp. C32	Micromonospora	sp.	OK	Contig	99.27	4.08	6548084	353700	73	37	MQ	PRJNA721289	SAMN18713698
GCF_018128905.1	Streptomyces sp. A2-16	Streptomyces	sp.	OK	Complete Genome	100	0.76	9796466	9765518	71	2	HQ	PRJNA671550	SAMN16534088
GCF_018141485.1	Streptomyces alfalfae	Streptomyces	alfalfae	OK	Complete Genome	99.47	0.39	8278595	8254035	72	2	HQ	PRJNA595105	SAMN13546201
GCF_018255875.1	Streptomyces lavendulae subsp. lavendulae	Streptomyces	lavendulae	OK	Complete Genome	100	0.85	8035918	8035918	73	1	HQ	PRJNA723819	SAMN18831505
GCF_018310575.1	Streptomyces sp. V17-9	Streptomyces	sp.	OK	Complete Genome	99.24	0.79	8151966	8151966	72	1	HQ	PRJNA725373	SAMN18877276
GCF_018343855.1	Rhodococcus sp. USK13	Rhodococcus	sp.	OK	Complete Genome	98.89	1.66	7952400	7180276	65.5	3	HQ	PRJNA679150	SAMN17526040
GCF_018588185.1	Rhodococcus sp. WY5	Rhodococcus	sp.	OK	Contig	99.59	1.32	7349989	6276785	62.5	8	MQ	PRJNA606420	SAMN14082650
GCF_018729485.1	Rhodococcus sp. GOMB7	Rhodococcus	sp.	OK	Contig	99.37	1.32	6639181	491927	62.5	38	MQ	PRJNA732393	SAMN19317832
GCF_018736145.1	Amycolatopsis sp. CA-230715	Amycolatopsis	sp.	OK	Complete Genome	99.01	2.54	10375238	10363158	70	2	HQ	PRJNA639419	SAMN15236371
GCF_018866325.1	Streptomyces sp. YPW6	Streptomyces	sp.	OK	Complete Genome	98.51	0.51	7695589	7695589	72	1	HQ	PRJNA733236	SAMN19372365
GCF_018885265.1	Amycolatopsis aidingensis	Amycolatopsis	aidingensis	OK	Complete Genome	96.77	3.65	7657695	7657695	70	1	HQ	PRJNA735318	SAMN19575567
GCF_019038635.1	Micromonospora sp. WMMB482	Micromonospora	sp.	OK	Contig	98.2	3.44	7131801	6851653	73	37	MQ	PRJNA739091	SAMN19771350
GCF_019048925.1	Rhodococcus qingshengii	Rhodococcus	qingshengii	OK	Complete Genome	98.92	2.72	7209323	6288981	62.5	4	HQ	PRJNA739011	SAMN19769069
GCF_019056675.1	Streptomyces sp. GMY02	Streptomyces	sp.	OK	Complete Genome	95.83	0.63	8512626	8512626	70.5	1	HQ	PRJNA737600	SAMN19700779
GCF_019095205.1	Rhodococcus pyridinivorans	Rhodococcus	pyridinivorans	OK	Complete Genome	97.22	4.7	5624156	4959969	67.5	5	HQ	PRJNA612986	SAMN14389653
GCF_019286195.1	Streptomyces albidoflavus	Streptomyces	albidoflavus	OK	Chromosome	99.43	0.82	7054925	2183821	73.5	8	HQ	PRJNA743529	SAMN20054489
GCF_019287315.1	Streptomyces sp. WY228	Streptomyces	sp.	OK	Complete Genome	98.73	0.19	8286721	8286721	71.5	1	HQ	PRJNA744180	SAMN20080897
GCF_019317345.1	Rhodococcus sp. LW-XY12	Rhodococcus	sp.	OK	Complete Genome	98.89	0.99	5802828	5208978	67.5	6	HQ	PRJNA745359	SAMN20164878
GCF_019330265.1	Amycolatopsis sp. TNS106	Amycolatopsis	sp.	OK	Complete Genome	99	1.21	8895521	8806031	69	2	HQ	PRJNA419268	SAMN08048820
GCF_019334125.1	Rhodococcus globerulus	Rhodococcus	globerulus	OK	Complete Genome	98.55	1.14	6739623	6739623	61.5	1	HQ	PRJNA743326	SAMN20011299
GCF_019374995.1	Micromonospora sp. RL09-050-HVF-A	Micromonospora	sp.	OK	Contig	91.58	4.48	7250049	7185463	72.5	3	MQ	PRJNA718589	SAMN18542731
GCF_019375475.1	Saccharothrix obliqua	Saccharothrix	obliqua	OK	Contig	99.67	1.34	8040245	572109	72.5	50	MQ	PRJNA748151	SAMN20308612
GCF_019378875.1	Rhodococcus sp. USK10	Rhodococcus	sp.	OK	Complete Genome	99.44	0.83	9870030	8396788	67	3	HQ	PRJNA679163	SAMN16789174
GCF_019378935.1	Streptomyces anulatus	Streptomyces	anulatus	OK	Complete Genome	99.91	0.53	8874447	8874447	71.5	1	HQ	PRJNA748163	SAMN20308717
GCF_019468465.1	Amycolatopsis sp. DSM 110486	Amycolatopsis	sp.	OK	Chromosome	99	5	10984256	10957130	70	2	HQ	PRJNA751440	SAMN20518293
GCF_019599145.1	Streptomyces akebiae	Streptomyces	akebiae	OK	Complete Genome	99.43	0.93	10549378	10257202	71	2	HQ	PRJNA751172	SAMN20511063
GCF_019703895.1	Streptomyces sp. EAS-AB2608	Streptomyces	sp.	OK	Complete Genome	99.46	1.24	9320785	9320785	72.5	1	HQ	PRJDB10690	SAMD00254949
GCF_019734155.1	Rhodococcus qingshengii	Rhodococcus	qingshengii	OK	Scaffold	99.54	0.99	6689971	977880	62.5	47	MQ	PRJNA612981	SAMN14389531
GCF_019774615.1	Streptomyces sp. BHT-5-2	Streptomyces	sp.	OK	Complete Genome	99.84	1.8	9126195	6317233	72	2	HQ	PRJNA752724	SAMN20606180
GCF_019880305.1	Streptomyces decoyicus	Streptomyces	decoyicus	OK	Complete Genome	99.94	0.71	8632952	8632952	71	1	HQ	PRJNA758235	SAMN21016877
GCF_019933235.1	Streptomyces angustmyceticus	Streptomyces	angustmyceticus	OK	Complete Genome	99.62	0.93	8116382	8116382	72	1	HQ	PRJNA759542	SAMN21169134
GCF_020026305.1	Streptomyces sp. 135	Streptomyces	sp.	OK	Complete Genome	97.51	0.63	8832922	8832922	71.5	1	HQ	PRJNA724811	SAMN18859273
GCF_020034615.2	Streptomyces sp. A144	Streptomyces	sp.	OK	Complete Genome	100	0.15	8262828	8085429	72.5	2	HQ	PRJNA756404	SAMN20865374
GCF_020099395.1	Streptomyces mobaraensis	Streptomyces	mobaraensis	OK	Complete Genome	98.79	1.5	7668063	7638929	73	2	HQ	PRJNA758832	SAMN21037215
GCF_020176955.2	Nocardia sp. alder85J	Nocardia	sp.	OK	Contig	96.69	4.27	9737565	715754	69.5	40	MQ	PRJNA748777	SAMN20345131
GCF_020216065.1	Nocardia rosealba	Nocardia	rosealba	OK	Scaffold	98.26	2.73	6405167	433237	68	26	MQ	PRJNA766167	SAMN21620047
GCF_020341595.1	Streptomyces sp. WA6-1-16	Streptomyces	sp.	OK	Complete Genome	99.86	1.07	8214879	8214879	71.5	1	HQ	PRJNA765746	SAMN21584111
GCF_020410765.1	Streptomyces marincola	Streptomyces	marincola	OK	Complete Genome	96.05	1.7	6629020	6629020	73.5	1	HQ	PRJNA765940	SAMN21592513
GCF_020535445.1	Rhodococcus qingshengii	Rhodococcus	qingshengii	OK	Chromosome	99.52	0.33	6286261	400672	62.5	31	HQ	PRJNA768104	SAMN22014169
GCF_020542785.1	Rhodococcus opacus PD630	Rhodococcus	opacus	OK	Complete Genome	99.16	1.91	9166298	8374353	67	4	HQ	PRJNA752705	SAMN20605963
GCF_020616555.1	Streptomyces longhuiensis	Streptomyces	longhuiensis	OK	Complete Genome	99.87	0.99	10018810	9816795	70.5	2	HQ	PRJNA768972	SAMN22072534
GCF_020637575.2	Rhodococcus rhodochrous	Rhodococcus	rhodochrous	OK	Complete Genome	99.11	0.83	6473592	5587176	67.5	3	HQ	PRJNA742134	SAMN19928396
GCF_020731305.1	Nocardia abscessus	Nocardia	abscessus	OK	Contig	99.12	3.49	8487012	8400138	68	2	MQ	PRJNA231221	SAMN22365125
GCF_020731565.1	Nocardia africana	Nocardia	africana	OK	Contig	98.46	3.37	7949771	5854393	68	4	MQ	PRJNA231221	SAMN22365126
GCF_020733635.1	Nocardia spumae	Nocardia	spumae	OK	Contig	99.4	1.7	7066968	6984863	68	5	MQ	PRJNA774632	SAMN22568590
GCF_020740535.1	Streptomyces profundus	Streptomyces	profundus	OK	Complete Genome	94.51	0.88	7653710	7653710	72	1	HQ	PRJNA754006	SAMN20720482
GCF_020782825.1	Rhodococcus sp. 3-2	Rhodococcus	sp.	OK	Contig	99.44	1.47	7073413	4337072	62.5	9	MQ	PRJNA776718	SAMN22815114
GCF_020783455.1	Streptomyces anulatus	Streptomyces	anulatus	OK	Complete Genome	99.91	0.09	8690773	8372992	71.5	2	HQ	PRJNA775803	SAMN22627480
GCF_020790115.1	Streptomyces lydicus	Streptomyces	lydicus	OK	Complete Genome	99.53	1.14	7832127	7832127	72	1	HQ	PRJNA774437	SAMN22563801
GCF_020809065.1	Rhodococcus sp. C1	Rhodococcus	sp.	OK	Complete Genome	99.34	0	6306490	6306490	62.5	1	HQ	PRJNA741057	SAMN19843835
GCF_020883195.1	Nocardia farcinica	Nocardia	farcinica	OK	Complete Genome	99.87	3.46	6613629	6229422	70.5	5	HQ	PRJNA777769	SAMN22875803
GCF_020884815.1	Micromonospora sp. NBRC 110038	Micromonospora	sp.	OK	Scaffold	96.71	4.66	7426651	508398	74	41	MQ	PRJDB3173	SAMD00020840
GCF_020885655.1	Rhodococcus sp. RDE2	Rhodococcus	sp.	OK	Complete Genome	98.77	0.65	5715406	5386255	68	7	HQ	PRJDB12029	SAMD00412678
GCF_020995455.1	Micromonospora aurantiaca	Micromonospora	aurantiaca	OK	Complete Genome	98.73	2.21	7149079	7149079	73	1	HQ	PRJNA768672	SAMN22060555
GCF_021028635.1	Streptomyces huasconensis	Streptomyces	huasconensis	OK	Complete Genome	100	0.25	8236582	8236582	71.5	1	HQ	PRJNA708196	SAMN18221133
GCF_021029465.1	Streptomyces sp. Go40/10	Streptomyces	sp.	OK	Complete Genome	100	1.49	9635564	9635564	72.5	1	HQ	PRJNA721311	SAMN18970196
GCF_021044705.1	Nocardia huaxiensis	Nocardia	huaxiensis	OK	Complete Genome	97.61	4.53	8314373	8314373	68	1	HQ	PRJNA778436	SAMN23376436
GCF_021165915.1	Rhodococcus aetherivorans	Rhodococcus	aetherivorans	OK	Complete Genome	99.52	0.66	5978842	5978842	70.5	1	HQ	PRJNA785397	SAMN23560838
GCF_021165975.1	Rhodococcus qingshengii	Rhodococcus	qingshengii	OK	Complete Genome	99.33	1.21	7381754	6457868	62.5	5	HQ	PRJNA784759	SAMN23500510
GCF_021165995.1	Rhodococcus pyridinivorans	Rhodococcus	pyridinivorans	OK	Complete Genome	96.39	2.15	5047200	4829321	68	3	HQ	PRJNA786288	SAMN23644635
GCF_021183565.1	Nocardia yamanashiensis	Nocardia	yamanashiensis	OK	Complete Genome	97.03	4.1	8468804	8468804	68	1	HQ	PRJNA231221	SAMN23242892
GCF_021183645.1	Nocardia gipuzkoensis	Nocardia	gipuzkoensis	OK	Complete Genome	99.24	2.94	8118644	8118644	68.5	1	HQ	PRJNA231221	SAMN23242888
GCF_021216675.1	Streptomyces gobiensis	Streptomyces	gobiensis	OK	Complete Genome	99.24	1.33	5691859	5691859	69	1	HQ	PRJNA762164	SAMN21379562
GCF_021233395.1	Streptomyces sp. HNM0561	Streptomyces	sp.	OK	Complete Genome	98.16	2.4	11689692	11656895	71	2	HQ	PRJNA788216	SAMN23931761
GCF_021383925.1	Streptomyces sp. BSE6.1	Streptomyces	sp.	OK	Complete Genome	100	0.13	8024389	8024389	72.5	1	HQ	PRJNA514840	SAMN12598824
GCF_021441945.1	Rhodococcus sp. DMF-1	Rhodococcus	sp.	OK	Complete Genome	99.44	0.4	5832009	5645979	70.5	3	HQ	PRJNA794015	SAMN24596080
GCF_021442415.2	Streptomyces sp. MH191	Streptomyces	sp.	OK	Complete Genome	99.84	0	7193104	7102631	72.5	2	HQ	PRJNA369718	SAMN06292591
GCF_021491675.1	Streptomyces sp. R527F	Streptomyces	sp.	OK	Complete Genome	99.86	0.35	7850121	7850121	71.5	1	HQ	PRJNA794954	SAMN24664210
GCF_021496785.1	Streptomyces sp. A1-5	Streptomyces	sp.	OK	Complete Genome	99.72	2.48	9459690	9459690	72	1	HQ	PRJNA482527	SAMN14979331
GCF_021653975.1	Amycolatopsis sp. GM8	Amycolatopsis	sp.	OK	Scaffold	97.13	2.57	8157730	712852	69	28	MQ	PRJNA781066	SAMN23227703
GCF_021665875.1	Streptomyces sp. AMCC400023	Streptomyces	sp.	OK	Complete Genome	99.62	1.18	10694683	10556261	71.5	3	HQ	PRJNA419158	SAMN08043889
GCF_021728735.1	Pseudonocardia sp. WMMC193	Pseudonocardia	sp.	OK	Contig	95.59	4.99	7158763	6814209	73	5	MQ	PRJNA799940	SAMN25221403
GCF_021852985.1	Rhodococcus ruber	Rhodococcus	ruber	OK	Contig	99.04	2.05	6312645	1010224	70	25	MQ	PRJNA759266	SAMN21161766
GCF_022026295.1	Streptomyces sp. NBU3104	Streptomyces	sp.	OK	Complete Genome	99.43	1.17	7162904	7077963	73.5	2	HQ	PRJNA798505	SAMN25078796
GCF_022059865.1	Rhodococcus erythropolis	Rhodococcus	erythropolis	OK	Complete Genome	97.65	3.33	6945915	6442563	62.5	5	HQ	PRJNA666739	SAMN16663087
GCF_022221585.1	Streptomyces inhibens	Streptomyces	inhibens	OK	Complete Genome	99.56	1.33	9696490	9696490	70.5	1	HQ	PRJNA730323	SAMN19228344
GCF_022230905.1	Micromonospora salmantinae	Micromonospora	salmantinae	OK	Contig	97.74	3.63	7012192	295666	71	45	MQ	PRJNA798208	SAMN25050330
GCF_022385335.1	Streptomyces deccanensis	Streptomyces	deccanensis	OK	Complete Genome	99.24	1.94	10101518	10101518	71	1	HQ	PRJNA800206	SAMN25235949
GCF_022414575.2	Streptomyces sp. MUM 178J	Streptomyces	sp.	OK	Complete Genome	99.86	0.38	6699249	6699249	71.5	1	HQ	PRJNA679911	SAMN16862319
GCF_022554085.1	Rhodococcus sp. CH91	Rhodococcus	sp.	OK	Contig	97.72	0.5	4892277	367258	68	40	MQ	PRJNA644777	SAMN24906810
GCF_022647665.1	Streptomyces formicae	Streptomyces	formicae	OK	Complete Genome	98.71	0.79	8205064	8177291	71	2	HQ	PRJNA705867	SAMN18318495
GCF_022655485.1	Rhodococcus opacus	Rhodococcus	opacus	OK	Complete Genome	98.17	0.86	8778379	7749377	67	4	HQ	PRJNA815953	SAMN26652345
GCF_022695595.1	Streptomyces sp. MST-110588	Streptomyces	sp.	OK	Complete Genome	90.55	0.57	7915503	7915503	71.5	1	HQ	PRJNA727408	SAMN19018531
GCF_022695635.1	Streptomyces sp. A10(2020)	Streptomyces	sp.	OK	Complete Genome	98.9	0.32	6984675	6984675	73.5	1	HQ	PRJNA672183	SAMN16560567
GCF_022699385.1	Streptomyces tubbatahanensis	Streptomyces	tubbatahanensis	OK	Complete Genome	99.05	1.64	7760770	7760770	72.5	1	HQ	PRJNA812338	SAMN26376210
GCF_022760275.1	Streptomyces sp. 891-h	Streptomyces	sp.	OK	Complete Genome	98.96	1.33	7839538	7804062	71	2	HQ	PRJNA615006	SAMN14444793
GCF_022807935.1	Streptomyces sp. HP-A2021	Streptomyces	sp.	OK	Complete Genome	99.62	1.01	9607552	9607552	71	1	HQ	PRJNA818053	SAMN26814757
GCF_022827705.1	Streptomyces sp. CB09030	Streptomyces	sp.	OK	Complete Genome	100	0	8368456	8368456	72.5	1	HQ	PRJNA801460	SAMN25351612
GCF_022869105.1	Streptomyces sp. BJ20	Streptomyces	sp.	OK	Complete Genome	99.81	0	7436964	7436964	72.5	1	HQ	PRJNA820980	SAMN27030758
GCF_022985635.2	Rhodococcus opacus	Rhodococcus	opacus	OK	Complete Genome	99.59	1.79	8601311	7770219	67.5	3	HQ	PRJNA813342	SAMN26492386
GCF_023023025.1	Amycolatopsis sp. WQ 127309	Amycolatopsis	sp.	OK	Complete Genome	98.85	2.87	11133454	11133454	71.5	1	HQ	PRJNA823866	SAMN27363616
GCF_023168385.1	Streptomyces sp. PLM4	Streptomyces	sp.	OK	Complete Genome	99.24	0.57	7000089	7000089	73.5	1	HQ	PRJNA820554	SAMN27015349
GCF_023221595.1	Rhodococcus qingshengii JCM 15477	Rhodococcus	qingshengii	OK	Complete Genome	99.52	0.73	7513265	6405102	62.5	6	HQ	PRJNA831584	SAMN27755118
GCF_023238485.1	Rhodococcus pyridinivorans	Rhodococcus	pyridinivorans	OK	Complete Genome	97.23	4.35	5237497	5126090	68	2	HQ	PRJNA832089	SAMN27776991
GCF_023273835.1	Streptomyces sp. LRE541	Streptomyces	sp.	OK	Complete Genome	99.75	0.76	9990036	9966248	71	2	HQ	PRJNA822621	SAMN27257152
GCF_023277745.1	Streptomyces halobius	Streptomyces	halobius	OK	Complete Genome	99.03	1.89	9239126	9239126	70	1	HQ	PRJNA762165	SAMN21379563
GCF_023277965.1	Streptomyces sp. HNA39	Streptomyces	sp.	OK	Complete Genome	99.86	0.68	7351753	7351753	72	1	HQ	PRJNA738628	SAMN19736012
GCF_023278385.1	Rhodococcus ruber	Rhodococcus	ruber	OK	Complete Genome	99.26	0.73	5952744	5636739	70	3	HQ	PRJNA730359	SAMN19229620
GCF_023330645.1	Streptomyces sp. HU2014	Streptomyces	sp.	OK	Chromosome	99.65	2.1	8502131	7941176	72.5	5	HQ	PRJNA832860	SAMN27923811
GCF_023376025.1	Amycolatopsis thermalba	Amycolatopsis	thermalba	OK	Complete Genome	97.74	1.32	7285716	7285716	72	1	HQ	PRJNA797850	SAMN25038735
GCF_023376055.1	Streptomyces fradiae	Streptomyces	fradiae	OK	Complete Genome	98.9	1.59	6125725	6125725	75	1	HQ	PRJNA715824	SAMN18471602
GCF_023498005.1	Streptomyces durmitorensis	Streptomyces	durmitorensis	OK	Complete Genome	100	0.19	9862620	9715409	70.5	2	HQ	PRJNA836727	SAMN28167653
GCF_023515955.1	Streptomyces sp. RerS4	Streptomyces	sp.	OK	Complete Genome	98.07	0.76	7543621	7301482	72	2	HQ	PRJNA836100	SAMN28131426
GCF_023702655.1	Streptomyces sp. Caat 7-52	Streptomyces	sp.	OK	Complete Genome	99.91	2	9048985	8714294	72	2	HQ	PRJNA843081	SAMN28700798
GCF_023704055.1	Rhodococcus sp. 11-3	Rhodococcus	sp.	OK	Chromosome	99.45	1.07	6138195	6128156	70.5	2	HQ	PRJNA748822	SAMN20345136
GCF_023822085.1	Rhodococcus pyridinivorans	Rhodococcus	pyridinivorans	OK	Complete Genome	97.24	3.91	5378452	4974370	68	3	HQ	PRJNA775846	SAMN22630081
GCF_023896955.1	Micromonospora sp. RHAY321	Micromonospora	sp.	OK	Contig	97.25	4.03	6889115	358144	72	45	MQ	PRJNA838754	SAMN28462501
GCF_023923245.1	Streptomyces phaeoluteigriseus	Streptomyces	phaeoluteigriseus	OK	Complete Genome	100	0.09	9118447	9026270	71.5	3	HQ	PRJNA849380	SAMN29051995
GCF_024171925.1	Actinokineospora diospyrosa	Actinokineospora	diospyrosa	OK	Scaffold	100	0.41	8112504	329360	70.5	39	MQ	PRJNA262058	SAMN03080616
GCF_024171985.1	Nocardia amikacinitolerans	Nocardia	amikacinitolerans	OK	Scaffold	99.46	3.11	7483246	426266	68.5	38	MQ	PRJNA297931	SAMN04244552
GCF_024172025.1	Nocardia amikacinitolerans	Nocardia	amikacinitolerans	OK	Scaffold	99.51	3.21	7314536	338755	68.5	43	MQ	PRJNA297932	SAMN04244562
GCF_024172095.1	Kitasatospora paracochleata	Kitasatospora	paracochleata	OK	Contig	98.24	2.01	8643301	1476119	73	9	MQ	PRJNA546637	SAMN12025042
GCF_024172145.1	Nocardia amikacinitolerans	Nocardia	amikacinitolerans	OK	Scaffold	99.27	3.34	7624385	330986	68.5	43	MQ	PRJNA297929	SAMN04244554
GCF_024218735.1	Streptomyces rimosus subsp. rimosus	Streptomyces	rimosus	OK	Complete Genome	98.86	2.81	9619655	9108208	72	2	HQ	PRJNA853543	SAMN29397007
GCF_024266895.1	Rhodococcus pyridinivorans	Rhodococcus	pyridinivorans	OK	Complete Genome	97.53	4.62	5613749	4869016	67.5	5	HQ	PRJNA827012	SAMN27594322
GCF_024297125.1	Streptomyces cavourensis	Streptomyces	cavourensis	OK	Complete Genome	96.25	0.24	7651223	7651223	72	1	HQ	PRJNA849725	SAMN29129586
GCF_024321955.1	Rhodococcus sp. GA1	Rhodococcus	sp.	OK	Complete Genome	99.16	1.32	5258851	5007152	68	4	HQ	PRJNA835912	SAMN28125187
GCF_024349805.1	Rhodococcus erythropolis	Rhodococcus	erythropolis	OK	Complete Genome	96.96	2.62	6768296	6455263	62.5	4	HQ	PRJDB7038	SAMD00119030
GCF_024362245.1	Rhodococcus gordoniae	Rhodococcus	gordoniae	OK	Complete Genome	98.06	0.66	5091060	4550112	68	4	HQ	PRJNA857828	SAMN29637735
GCF_024365045.1	Streptomyces cavourensis	Streptomyces	cavourensis	OK	Complete Genome	99.86	0.99	8041562	7846900	72	2	HQ	PRJNA856056	SAMN29513891
GCF_024442315.1	Streptomyces koelreuteriae	Streptomyces	koelreuteriae	OK	Complete Genome	100	0.19	8633395	8599387	71	2	HQ	PRJNA859237	SAMN29772186
GCF_024498635.1	Rhodococcus qingshengii	Rhodococcus	qingshengii	OK	Complete Genome	99.25	0.33	6917920	6322448	62.5	2	HQ	PRJNA785373	SAMN23555493
GCF_024584805.1	Streptomyces sp. FIT100	Streptomyces	sp.	OK	Chromosome	99.4	0.88	7965264	5097057	71	5	HQ	PRJNA705867	SAMN19250622
GCF_024611995.1	Streptomyces sp. NBC_00162	Streptomyces	sp.	OK	Complete Genome	99.87	0.4	9023989	8635149	71	2	HQ	PRJNA689727	SAMN17224119
GCF_024612015.1	Streptomyces sp. CA-210063	Streptomyces	sp.	OK	Complete Genome	100	2.4	10859970	10859970	70.5	1	HQ	PRJNA689732	SAMN17224121
GCF_024612035.1	Streptomyces sp. DSM 40750	Streptomyces	sp.	OK	Complete Genome	100	2.45	11540835	11540835	70.5	1	HQ	PRJNA689728	SAMN17224120
GCF_024628825.1	Amycolatopsis roodepoortensis	Amycolatopsis	roodepoortensis	OK	Complete Genome	99	2.82	9489959	9489959	69	1	HQ	PRJNA863421	SAMN30034681
GCF_024666385.1	Streptomyces yangpuensis	Streptomyces	yangpuensis	OK	Complete Genome	99.57	1.2	8092115	7435303	72	4	HQ	PRJNA865566	SAMN30120904
GCF_024701375.2	Streptomyces sp. KMM 9044	Streptomyces	sp.	OK	Complete Genome	98.8	0.05	7433909	7317619	71	3	HQ	PRJNA639328	SAMN15233084
GCF_024734405.1	Saccharopolyspora gregorii	Saccharopolyspora	gregorii	OK	Complete Genome	99.09	1.16	6344421	6344421	72.5	1	HQ	PRJNA647985	SAMN15615649
GCF_024752535.1	Streptomyces albus	Streptomyces	albus	OK	Complete Genome	99.24	0.69	8033415	7889116	72.5	2	HQ	PRJNA866400	SAMN30165104
GCF_024760325.1	Rhodococcus pyridinivorans	Rhodococcus	pyridinivorans	OK	Complete Genome	97.35	4.22	5373217	4948512	68	4	HQ	PRJNA871964	SAMN30434734
GCF_024760565.1	Actinokineospora sp. UTMC 2448	Actinokineospora	sp.	OK	Complete Genome	100	1.74	7012397	7012397	72.5	1	HQ	PRJNA480784	SAMN09645069
GCF_024809795.1	Rhodococcus erythropolis	Rhodococcus	erythropolis	OK	Contig	94.86	3.21	6708497	529846	62.5	37	MQ	PRJNA834409	SAMN28058314
GCF_025133285.1	Streptomyces carpaticus	Streptomyces	carpaticus	OK	Complete Genome	96.69	0.6	5968715	5968715	73	1	HQ	PRJNA269675	SAMN30493425
GCF_025231465.1	Streptomyces murinus	Streptomyces	murinus	OK	Complete Genome	99.53	0.98	8349858	8349858	72	1	HQ	PRJNA594329	SAMN13512716
GCF_025252265.1	Streptomyces angustmyceticus	Streptomyces	angustmyceticus	OK	Complete Genome	99.18	0.63	8107672	7443041	72.5	4	HQ	PRJNA870753	SAMN30385405
GCF_025370975.1	Rhodococcus qingshengii	Rhodococcus	qingshengii	OK	Complete Genome	99.59	0.11	6373845	6373845	62.5	1	HQ	PRJNA881770	SAMN30915394
GCF_025402955.1	Streptomyces sp. FZ201	Streptomyces	sp.	OK	Complete Genome	99.38	1.52	8604396	8604396	71.5	1	HQ	PRJNA881850	SAMN30917059
GCF_025642135.1	Streptomyces cynarae	Streptomyces	cynarae	OK	Complete Genome	97.44	1.74	9362607	9054161	70.5	2	HQ	PRJNA883553	SAMN30971523
GCF_025642155.1	Streptomyces sp. HUAS 15-9	Streptomyces	sp.	OK	Complete Genome	97.82	0.76	9604367	9258818	70.5	3	HQ	PRJNA883558	SAMN30971617
GCF_025643355.1	Streptomyces sp. SCSIO ZS0520	Streptomyces	sp.	OK	Complete Genome	99.91	1.52	7919716	7919716	73	1	HQ	PRJNA807485	SAMN25988406
GCF_025643595.1	Saccharopolyspora rosea	Saccharopolyspora	rosea	OK	Complete Genome	98.84	1.74	6562638	6562638	71.5	1	HQ	PRJNA869361	SAMN30306658
GCF_025722975.1	Rhodococcus aetherivorans	Rhodococcus	aetherivorans	OK	Complete Genome	99.52	0.77	6558029	6132881	70	3	HQ	PRJNA885174	SAMN31078896
GCF_025837095.1	Rhodococcus sp. Z13	Rhodococcus	sp.	OK	Complete Genome	94.96	0.43	4532339	4532339	70	1	HQ	PRJNA887228	SAMN31157772
GCF_025908395.1	Streptomyces milbemycinicus	Streptomyces	milbemycinicus	OK	Complete Genome	98.9	1.04	12063392	12063392	70.5	1	HQ	PRJNA855249	SAMN29485783
GCF_025961405.1	Rhodococcus erythropolis	Rhodococcus	erythropolis	OK	Contig	95.74	3.8	6759720	6433261	62.5	2	MQ	PRJNA834296	SAMN28058273
GCF_026062495.1	Rhodococcus opacus	Rhodococcus	opacus	OK	Complete Genome	99.59	1.77	9286873	8186756	67	2	HQ	PRJNA896354	SAMN31543110
GCF_026074015.1	Rhodococcus qingshengii	Rhodococcus	qingshengii	OK	Complete Genome	99.14	0.48	7135259	6439972	62.5	4	HQ	PRJDB13588	SAMD00491760
GCF_026153095.1	Streptomyces sp. VB1	Streptomyces	sp.	OK	Chromosome	98.58	0.88	8804882	8656701	71.5	3	HQ	PRJNA891055	SAMN31307266
GCF_026239515.1	Streptomyces sp. Je 1-4 4N24	Streptomyces	sp.	OK	Complete Genome	99.84	0.711744	8915460	8915460	71	1	HQ	PRJNA896761	SAMN31566138
GCF_026339535.1	Micromonospora peucetia	Micromonospora	peucetia	OK	Contig	100	1.31579	7185853	1441445	72.4	7	HQ	PRJNA747871	SAMN30553464
GCF_026339595.1	Kitasatospora papulosa	Kitasatospora	papulosa	OK	Contig	99.91	0.09	7506106	1269900	71	13	MQ	PRJNA747871	SAMN30553434
GCF_026339705.1	Streptomyces cellulosae	Streptomyces	cellulosae	Inconclusive	Contig	100	0.143062	8448141	6136491	71.9	14	HQ	PRJNA747871	SAMN30553408
GCF_045041205.1	Kitasatospora sp. NBC 00070	Kitasatospora	sp.	OK	Complete Genome	99.4737	1.40351	8502283	7729880	72	2	HQ	PRJNA747871	SAMN30552896
GCF_026340265.1	Kitasatospora purpeofusca	Kitasatospora	purpeofusca	OK	Contig	98.33	2.97	9791171	9592751	73	3	MQ	PRJNA747871	SAMN24016577
GCF_026340285.1	Streptomyces uncialis	Streptomyces	uncialis	Inconclusive	Contig	99.91	0.71	8383510	4839825	68	4	HQ	PRJNA747871	SAMN24016554
GCF_026340475.1	Streptomyces virginiae	Streptomyces	virginiae	Inconclusive	Contig	99.62	0.95	7393046	1302360	71.3	16	HQ	PRJNA747871	SAMN30553295
GCF_026340565.1	Kitasatospora sp. NBC_01287	Kitasatospora	sp.	OK	Contig	97.95	4.29	9487181	8515066	73	4	MQ	PRJNA747871	SAMN24016491
GCF_026340665.1	Streptomyces antibioticus	Streptomyces	antibioticus	Inconclusive	Contig	99.95	0.19	8626826	4143092	73.8	11	HQ	PRJNA747871	SAMN24016481
GCF_026340775.1	Kitasatospora purpeofusca	Kitasatospora	purpeofusca	OK	Contig	98.71	2.87	8856443	3432593	73.5	3	MQ	PRJNA747871	SAMN24016472
GCF_026341135.1	Streptomyces canus	Streptomyces	canus	Inconclusive	Contig	99.85	0.56	11169549	11744127	66.9	4	HQ	PRJNA747871	SAMN24016329
GCF_026341715.1	Streptomyces virginiae	Streptomyces	virginiae	Inconclusive	Contig	99.24	0.62	9109135	3796955	71.8	3	HQ	PRJNA747871	SAMN30553164
GCF_026341895.1	Streptomyces longwoodensis	Streptomyces	longwoodensis	Inconclusive	Contig	99.62	1.61	8781837	4942821	69.6	4	HQ	PRJNA747871	SAMN24016244
GCF_026342015.1	Micromonospora lupini	Micromonospora	lupini	Inconclusive	Contig	100	0.394737	7356323	2848393	71.8	4	HQ	PRJNA747871	SAMN30553066
GCF_026342155.1	Micromonospora sp. NBC_00362	Micromonospora	sp.	OK	Contig	97.8	2.12	7354413	6966155	71	3	MQ	PRJNA747871	SAMN30553036
GCF_026342285.1	Streptomyces virginiae	Streptomyces	virginiae	Inconclusive	Contig	99.62	0.8	7978920	8024899	73	2	HQ	PRJNA747871	SAMN30552983
GCF_026342305.1	Streptomyces antibioticus	Streptomyces	antibioticus	Inconclusive	Contig	100	0.51	9338267	7952161	68.1	3	HQ	PRJNA747871	SAMN24016207
GCF_026342405.1	Kitasatospora sp. NBC_00240	Kitasatospora	sp.	OK	Contig	97.66	3.96	10447031	9383457	73	9	MQ	PRJNA747871	SAMN24016199
GCF_026342455.1	Streptomyces canus	Streptomyces	canus	Inconclusive	Contig	98.6	0.6	11845801	1371867	77.7	21	HQ	PRJNA747871	SAMN30552964
GCF_026342475.1	Streptomyces virginiae	Streptomyces	virginiae	Inconclusive	Contig	100	1.58	9193344	5953596	65.5	17	HQ	PRJNA747871	SAMN30552963
GCF_026343645.1	Streptomyces erythrochromogenes	Streptomyces	erythrochromogenes	Inconclusive	Contig	100	0	8057406	2021119	76.2	10	HQ	PRJNA747871	SAMN30552875
GCF_026427415.1	Streptomyces tanashiensis	Streptomyces	tanashiensis	OK	Complete Genome	99.53	1.33	8694918	8694918	72	1	HQ	PRJNA766504	SAMN21849707
GCF_026626005.1	Streptomyces sp. NA13	Streptomyces	sp.	OK	Complete Genome	99.53	0.95	7099980	6913849	73.5	2	HQ	PRJNA903681	SAMN31811227
GCF_026635925.1	Streptomyces albidoflavus	Streptomyces	albidoflavus	OK	Complete Genome	99.53	0.76	6341040	6341040	73	1	HQ	PRJNA901986	SAMN31743404
GCF_026642235.1	Streptomyces cavourensis	Streptomyces	cavourensis	OK	Complete Genome	99.33	0.87	7739059	7685966	72	2	HQ	PRJNA904960	SAMN31859379
GCF_026651955.1	Streptomyces sp. EMB24	Streptomyces	sp.	OK	Complete Genome	99.81	0.38	7252958	7252958	72.5	1	HQ	PRJNA729206	SAMN19113948
GCF_026802195.1	Amycolatopsis sp. HUAS 11-8	Amycolatopsis	sp.	OK	Complete Genome	98.48	1.66	7474574	7474574	70.5	1	HQ	PRJNA902302	SAMN31751692
GCF_026802215.1	Kitasatospora sp. YST-16	Kitasatospora	sp.	OK	Complete Genome	97.56	1.89	7659304	7659304	74	1	HQ	PRJNA905812	SAMN31884061
GCF_026810085.1	Rhodococcus sp. JS3073	Rhodococcus	sp.	OK	Complete Genome	97.19	2.22	9716225	8328787	67	2	HQ	PRJNA908291	SAMN32034740
GCF_026810505.1	Streptomyces sp. Je 1-369	Streptomyces	sp.	OK	Complete Genome	99.53	1.81	8820026	8820026	71	1	HQ	PRJNA860344	SAMN29841164
GCF_026898115.1	Streptomyces sp. S465	Streptomyces	sp.	OK	Complete Genome	99.24	1.14	9662200	9638869	71.5	2	HQ	PRJNA881791	SAMN30915918
GCF_027270315.1	Streptomyces cinnabarinus	Streptomyces	cinnabarinus	OK	Complete Genome	99.85	0.82	9621721	9621721	71	1	HQ	PRJNA911059	SAMN32161845
GCF_027460145.1	Micromonospora sp. WMMA1949	Micromonospora	sp.	OK	Contig	98.58	2.27	6556387	6524838	72.5	2	MQ	PRJNA913091	SAMN32275636
GCF_027460165.1	Micromonospora sp. WMMC241	Micromonospora	sp.	OK	Contig	97.58	4.23	6798238	6758121	73.5	2	MQ	PRJNA913091	SAMN32275694
GCF_027460215.1	Micromonospora sp. WMMC250	Micromonospora	sp.	OK	Contig	98.24	4.5	7574149	7532067	71	2	MQ	PRJNA912997	SAMN32270389
GCF_027460285.1	Micromonospora sp. WMMC273	Micromonospora	sp.	OK	Contig	99.01	2.75	6751098	6588525	73	4	MQ	PRJNA913091	SAMN32275762
GCF_027497195.1	Streptomyces sp. WMMC500	Streptomyces	sp.	OK	Chromosome	98.01	0.76	8614441	8614341	73	1	HQ	PRJNA913091	SAMN32275908
GCF_027497235.1	Micromonospora sp. WMMD1128	Micromonospora	sp.	OK	Chromosome	94.86	4.95	6814237	6814137	73	1	HQ	PRJNA913091	SAMN32276248
GCF_027497255.1	Micromonospora sp. WMMD882	Micromonospora	sp.	OK	Chromosome	93.79	4.98	6367061	6366961	73.5	1	HQ	PRJNA913091	SAMN32275997
GCF_027497275.1	Micromonospora sp. WMMC264	Micromonospora	sp.	OK	Chromosome	98.24	4.99	6792654	6792554	73	1	HQ	PRJNA913091	SAMN32275728
GCF_027497335.1	Micromonospora sp. WMMA1976	Micromonospora	sp.	OK	Chromosome	99.01	2.87	6610448	6610348	73	1	HQ	PRJNA913091	SAMN32271180
GCF_027497355.1	Micromonospora sp. WMMA1947	Micromonospora	sp.	OK	Chromosome	98.55	2.04	6311179	6311079	73	1	HQ	PRJNA913091	SAMN32275623
GCF_027497375.1	Micromonospora sp. WMMA1998	Micromonospora	sp.	OK	Chromosome	97.58	2.27	6462233	6462133	73.5	1	HQ	PRJNA913091	SAMN32271873
GCF_027497475.1	Streptomyces libani subsp. libani	Streptomyces	libani	OK	Complete Genome	99.94	0.76	9201100	9201100	71	1	HQ	PRJNA906345	SAMN31919752
GCF_027497495.1	Streptomyces tubercidicus	Streptomyces	tubercidicus	OK	Complete Genome	99.94	1.33	8284047	8284047	70.5	1	HQ	PRJNA906344	SAMN31919750
GCF_027625935.1	Streptomyces camelliae	Streptomyces	camelliae	OK	Complete Genome	100	1.68	9598041	9319598	71	3	HQ	PRJNA910490	SAMN32126906
GCF_027627435.1	Kitasatospora cathayae	Kitasatospora	cathayae	OK	Complete Genome	98.11	4.06	9155765	8860963	72.5	6	HQ	PRJNA910482	SAMN32126822
GCF_027627575.1	Kribbella sp. CA-293567	Kribbella	sp.	OK	Complete Genome	98.08	4.62	7611196	7611196	68.5	1	HQ	PRJNA907737	SAMN31989305
GCF_027854095.1	Rhodococcus sp. C-2	Rhodococcus	sp.	OK	Scaffold	99.52	0	7039419	315667	62.5	47	MQ	PRJNA918341	SAMN32574134
GCF_027924345.1	Nocardia sputorum	Nocardia	sputorum	OK	Complete Genome	98.93	3.2	7610579	7558724	69	2	HQ	PRJDB14512	SAMD00548744
GCF_027924405.1	Nocardia sputorum	Nocardia	sputorum	OK	Complete Genome	98.93	2.37	7431165	7431165	69	1	HQ	PRJDB14512	SAMD00548745
GCF_027925725.1	Micromonospora sp. AKA38	Micromonospora	sp.	OK	Contig	97.28	3.47	7226167	1519263	73	11	MQ	PRJDB9819	SAMD00228009
GCF_027942015.1	Streptomyces goshikiensis	Streptomyces	goshikiensis	OK	Complete Genome	99.53	1.45	8161592	7239828	72.5	5	HQ	PRJNA919099	SAMN32622198
GCF_027947575.1	Streptomyces rubrogriseus	Streptomyces	rubrogriseus	OK	Complete Genome	99.53	0.24	8411861	8411861	72	1	HQ	PRJDB6185	SAMD00090290
GCF_027947595.1	Streptomyces lienomycini	Streptomyces	lienomycini	OK	Complete Genome	99.91	0.76	7863969	7863969	72.5	1	HQ	PRJNA347091	SAMN05878356
GCF_028198125.1	Streptomyces sp. HUAS 31	Streptomyces	sp.	OK	Complete Genome	100	0.63	9946594	9740281	71	2	HQ	PRJNA923178	SAMN32691360
GCF_028421465.1	Streptomyces xanthophaeus	Streptomyces	xanthophaeus	OK	Complete Genome	99.87	1.89	8595635	8204848	72	3	HQ	PRJNA923126	SAMN32686701
GCF_028473745.1	Streptomyces sp. M92	Streptomyces	sp.	OK	Complete Genome	99.24	0.19	7790858	7680776	72	2	HQ	PRJNA812928	SAMN28237698
GCF_028475105.1	Micromonospora sp. LH3U1	Micromonospora	sp.	OK	Complete Genome	95	3.61	7090248	7090248	71	1	HQ	PRJNA917709	SAMN32546968
GCF_028622875.1	Streptomyces sp. MMBL 11-1	Streptomyces	sp.	OK	Complete Genome	99.91	1.12	8496900	8003288	71.5	5	HQ	PRJNA932473	SAMN33195109
GCF_028736035.1	Streptomyces sp. T12	Streptomyces	sp.	OK	Complete Genome	99.94	0.44	11483874	11360781	70.5	3	HQ	PRJNA917540	SAMN32542088
GCF_028747205.1	Streptomyces sp. CA-278952	Streptomyces	sp.	OK	Complete Genome	99.91	0.38	8211675	8211675	71.5	1	HQ	PRJNA883035	SAMN31235823
GCF_028753175.1	Streptomyces murinus	Streptomyces	murinus	OK	Chromosome	99.15	1.42	8559200	4545191	71.5	3	HQ	PRJNA805362	SAMN25855046
GCF_028768405.1	Micromonospora chalcea	Micromonospora	chalcea	OK	Complete Genome	98.25	4.76	6861996	6861996	73	1	HQ	PRJNA935417	SAMN33316578
GCF_028870195.1	Streptomyces sp. G7(2002)	Streptomyces	sp.	OK	Complete Genome	99.94	2.21	9364413	9364413	71	1	HQ	PRJNA867684	SAMN30222392
GCF_028898845.1	Streptomyces sp. WZ-12	Streptomyces	sp.	OK	Complete Genome	98.48	2.94	9547725	9169400	71.5	2	HQ	PRJNA936401	SAMN33344472
GCF_029011865.1	Streptomyces yunnanensis	Streptomyces	yunnanensis	OK	Complete Genome	99.72	2.18	9982274	9982274	71.5	1	HQ	PRJNA816341	SAMN26674605
GCF_029167005.1	Streptomyces sp. VNUA24	Streptomyces	sp.	OK	Complete Genome	99.62	1.58	9974491	9974491	71.5	1	HQ	PRJNA939376	SAMN33463799
GCF_029167585.1	Streptomyces sp. AM 3-1-1	Streptomyces	sp.	OK	Complete Genome	99.34	0	7337058	7337058	73.5	1	HQ	PRJNA934748	SAMN33281643
GCF_029167625.1	Streptomyces sp. AM 4-1-1	Streptomyces	sp.	OK	Complete Genome	98.77	1.12	7465012	7168657	71	2	HQ	PRJNA934748	SAMN33281646
GCF_029167645.1	Streptomyces sp. AM 2-1-1	Streptomyces	sp.	OK	Complete Genome	99.91	0	7215805	7134031	72	2	HQ	PRJNA934748	SAMN33281645
GCF_029369745.1	Amycolatopsis sp. QT-25	Amycolatopsis	sp.	OK	Complete Genome	98.66	0.58	8010145	8010145	68.5	1	HQ	PRJNA943068	SAMN33707029
GCF_029392895.1	Streptomyces sp. 71268	Streptomyces	sp.	OK	Complete Genome	98.17	1.48	8379354	8379354	73	1	HQ	PRJNA907813	SAMN31997672
GCF_029457415.1	Rhodococcus sp. RCBS9	Rhodococcus	sp.	OK	Complete Genome	99.47	0.33	6513710	6513710	62.5	1	HQ	PRJNA941086	SAMN33589587
GCF_029457455.1	Rhodococcus rhodochrous	Rhodococcus	rhodochrous	OK	Complete Genome	99.02	0.61	5612657	5154266	68	3	HQ	PRJNA935543	SAMN33321494
GCF_029541745.1	Streptomyces sp. LX-29	Streptomyces	sp.	OK	Complete Genome	99.53	1.25	8228343	8228343	72.5	1	HQ	PRJNA785759	SAMN23575921
GCF_029542005.1	Streptomyces olivaceus	Streptomyces	olivaceus	OK	Chromosome	99.57	0	8683276	8255514	72.5	2	HQ	PRJNA812928	SAMN28233815
GCF_029581215.1	Micromonospora sp. WMMD975	Micromonospora	sp.	OK	Chromosome	95.43	4.31	6793126	6793026	73	1	HQ	PRJNA913091	SAMN32306302
GCF_029581275.1	Micromonospora sp. WMMD1155	Micromonospora	sp.	OK	Chromosome	96.78	3.76	7344527	7344427	71.5	1	HQ	PRJNA913091	SAMN32307242
GCF_029581435.1	Micromonospora sp. WMMD987	Micromonospora	sp.	OK	Chromosome	94.77	3.95	6895682	6895582	73	1	HQ	PRJNA913091	SAMN32306743
GCF_029581455.1	Micromonospora sp. WMMD964	Micromonospora	sp.	OK	Chromosome	97.1	3.29	6823872	6823772	71.5	1	HQ	PRJNA913091	SAMN32306793
GCF_029581475.1	Micromonospora sp. WMMD1076	Micromonospora	sp.	OK	Chromosome	97.87	2.96	6446166	6446066	73	1	HQ	PRJNA913091	SAMN32307977
GCF_029626035.1	Micromonospora sp. WMMD980	Micromonospora	sp.	OK	Contig	94.35	2.97	6833550	6779079	73	4	MQ	PRJNA913091	SAMN32306310
GCF_029626045.1	Micromonospora sp. WMMD710	Micromonospora	sp.	OK	Contig	96.23	2.88	6804931	6732694	71.5	4	MQ	PRJNA913091	SAMN32306174
GCF_029626075.1	Micromonospora sp. WMMD718	Micromonospora	sp.	OK	Contig	98.98	2.68	7804849	7616945	72.5	3	MQ	PRJNA913091	SAMN32307588
GCF_029626125.1	Micromonospora sp. WMMD956	Micromonospora	sp.	OK	Contig	97.12	4.56	7590188	7544666	74	5	MQ	PRJNA913091	SAMN32307667
GCF_029626145.1	Micromonospora sp. WMMD961	Micromonospora	sp.	OK	Contig	97.89	2.84	7038086	7023752	71.5	2	MQ	PRJNA913091	SAMN32307692
GCF_029626165.1	Micromonospora sp. WMMD967	Micromonospora	sp.	OK	Contig	97.41	4.15	7370304	7336724	71	3	MQ	PRJNA913091	SAMN32307717
GCF_029675105.1	Nocardia sp. AG03	Nocardia	sp.	OK	Contig	98.66	3.76	6424294	596554	69.5	42	MQ	PRJNA930141	SAMN32984421
GCF_029691645.1	Rhodococcus aetherivorans	Rhodococcus	aetherivorans	OK	Complete Genome	99.45	0.33	6123005	6123005	70.5	1	HQ	PRJNA949153	SAMN33926745
GCF_029760955.1	Streptomyces cathayae	Streptomyces	cathayae	OK	Complete Genome	99.81	1.07	7614103	7464554	71.5	2	HQ	PRJNA939508	SAMN33481860
GCF_029867425.1	Nocardia cyriacigeorgica	Nocardia	cyriacigeorgica	OK	Contig	99.51	1.43	6351183	218747	68	44	MQ	PRJNA956874	SAMN34231268
GCF_029867505.1	Nocardia farcinica	Nocardia	farcinica	OK	Contig	99.87	1.7	6117239	421577	71	49	MQ	PRJNA956874	SAMN34231264
GCF_029867605.1	Nocardia cyriacigeorgica	Nocardia	cyriacigeorgica	OK	Contig	99.3	1.78	6390242	388901	68.5	40	MQ	PRJNA956874	SAMN34231257
GCF_029867665.1	Nocardia cyriacigeorgica	Nocardia	cyriacigeorgica	OK	Contig	99.51	1.83	6653599	275099	68	47	MQ	PRJNA956874	SAMN34231255
GCF_029867685.1	Nocardia cyriacigeorgica	Nocardia	cyriacigeorgica	OK	Contig	99.51	1.76	6415331	290456	68	44	MQ	PRJNA956874	SAMN34231251
GCF_029868005.1	Nocardia cyriacigeorgica	Nocardia	cyriacigeorgica	OK	Contig	99.25	1.67	6416351	372374	68.5	37	MQ	PRJNA956874	SAMN34231231
GCF_029868265.1	Nocardia cyriacigeorgica	Nocardia	cyriacigeorgica	OK	Contig	99.3	1.78	6379313	396434	68.5	46	MQ	PRJNA956874	SAMN34231347
GCF_029868465.1	Nocardia cyriacigeorgica	Nocardia	cyriacigeorgica	OK	Contig	98.76	1.35	6463733	329009	68.5	44	MQ	PRJNA956874	SAMN34231337
GCF_029868685.1	Nocardia cyriacigeorgica	Nocardia	cyriacigeorgica	OK	Contig	99.23	1.78	6532988	315207	68.5	46	MQ	PRJNA956874	SAMN34231326
GCF_029868705.1	Nocardia cyriacigeorgica	Nocardia	cyriacigeorgica	OK	Contig	99.3	2.39	6460684	406670	68.5	48	MQ	PRJNA956874	SAMN34231325
GCF_029868765.1	Nocardia cyriacigeorgica	Nocardia	cyriacigeorgica	OK	Contig	99.3	1.48	6315214	430292	68.5	45	MQ	PRJNA956874	SAMN34231322
GCF_029868785.1	Nocardia cyriacigeorgica	Nocardia	cyriacigeorgica	OK	Contig	99.19	1.32	6269970	341207	68.5	36	MQ	PRJNA956874	SAMN34231321
GCF_029868805.1	Nocardia cyriacigeorgica	Nocardia	cyriacigeorgica	OK	Contig	99.3	1.67	6487247	502860	68.5	35	MQ	PRJNA956874	SAMN34231320
GCF_029868825.1	Nocardia cyriacigeorgica	Nocardia	cyriacigeorgica	OK	Contig	99.16	1.59	6447607	318386	68.5	38	MQ	PRJNA956874	SAMN34231319
GCF_029869775.1	Nocardia farcinica	Nocardia	farcinica	OK	Contig	99.87	1.7	6111595	344322	71	44	MQ	PRJNA956874	SAMN34231256
GCF_029869825.1	Nocardia cyriacigeorgica	Nocardia	cyriacigeorgica	OK	Contig	99.3	1.59	6308963	442312	68.5	40	MQ	PRJNA956874	SAMN34231252
GCF_029892095.1	Kitasatospora sp. MAP12-44	Kitasatospora	sp.	OK	Contig	98.15	3.25	9043878	8840452	71.5	4	MQ	PRJNA945121	SAMN33774305
GCF_029906565.1	Streptomyces sp. SH5	Streptomyces	sp.	OK	Complete Genome	99.86	0.81	7779627	7779627	71.5	1	HQ	PRJNA957491	SAMN34257186
GCF_029952525.1	Saccharopolyspora ipomoeae	Saccharopolyspora	ipomoeae	OK	Contig	99.48	1	6632632	237303	70.5	47	MQ	PRJNA957976	SAMN34276205
GCF_029958325.1	Rhodococcus erythropolis	Rhodococcus	erythropolis	OK	Complete Genome	96.18	2.97	6699569	6376501	62.5	5	HQ	PRJNA962103	SAMN34381693
GCF_030028615.1	Streptomyces sp. BPPL-273	Streptomyces	sp.	OK	Complete Genome	100	1.01	7856756	7856756	72.5	1	HQ	PRJNA891226	SAMN31313317
GCF_030028635.1	Streptomyces sp. BPTC-684	Streptomyces	sp.	OK	Complete Genome	94.64	1.76	7333529	7333529	71.5	1	HQ	PRJNA962696	SAMN34414250
GCF_030122705.1	Streptomyces sp. NA07423	Streptomyces	sp.	OK	Complete Genome	99.91	1.89	11519256	11519256	71	1	HQ	PRJNA957929	SAMN34272940
GCF_030167965.1	Streptomyces sp. 2P-4	Streptomyces	sp.	OK	Complete Genome	99.43	0.406711	7480092	6930105	73.5	2	HQ	PRJNA822542	SAMN27191767
GCF_030264295.1	Amycolatopsis sp. 2-2	Amycolatopsis	sp.	OK	Complete Genome	94.44	4.8	10665068	10665068	71.5	1	HQ	PRJNA978978	SAMN35563479
GCF_030268905.1	Actinokineospora globicatena	Actinokineospora	globicatena	OK	Scaffold	100	1.24	7641567	832600	71	24	MQ	PRJDB14606	SAMD00538865
GCF_030268945.1	Actinokineospora globicatena	Actinokineospora	globicatena	OK	Scaffold	99.75	1.24	7725566	587334	71	43	MQ	PRJDB14606	SAMD00538868
GCF_030269325.1	Amycolatopsis sp. NBRC 101858	Amycolatopsis	sp.	OK	Scaffold	98.65	3.02	11164655	888161	71.5	27	MQ	PRJDB14606	SAMD00540007
GCF_030269705.1	Micromonospora sp. NBRC 107095	Micromonospora	sp.	OK	Scaffold	97.69	4.94	7063638	670032	71.5	25	MQ	PRJDB14606	SAMD00541690
GCF_030285625.1	Amycolatopsis sp. 2-15	Amycolatopsis	sp.	OK	Complete Genome	97.95	3.46	10050063	10050063	70.5	1	HQ	PRJNA978978	SAMN35578083
GCF_030285645.1	Amycolatopsis sp. DG1A-15b	Amycolatopsis	sp.	OK	Complete Genome	97.99	1.68	10407650	10407650	71.5	1	HQ	PRJNA978978	SAMN35578152
GCF_030285665.1	Amycolatopsis mongoliensis	Amycolatopsis	mongoliensis	OK	Complete Genome	97.99	3.54	10811244	10811244	71.5	1	HQ	PRJNA978978	SAMN35578144
GCF_030291795.1	Streptomyces antimycoticus	Streptomyces	antimycoticus	OK	Complete Genome	99.72	1.74	9718239	9718239	71	1	HQ	PRJNA982558	SAMN35710397
GCF_030345275.1	Streptomyces albidoflavus	Streptomyces	albidoflavus	OK	Complete Genome	99.24	1.01	6932303	6932303	73.5	1	HQ	PRJNA962069	SAMN34378109
GCF_030406845.1	Streptomyces sp. P9-2B-1	Streptomyces	sp.	OK	Complete Genome	99.43	0.09	7408683	7408683	71	1	HQ	PRJNA985726	SAMN35803695
GCF_030406865.1	Streptomyces sp. P9-2B-2	Streptomyces	sp.	OK	Complete Genome	99.94	0.19	8895847	8743146	71	2	HQ	PRJNA985726	SAMN35803696
GCF_030406905.1	Streptomyces sp. HUAS CB01	Streptomyces	sp.	OK	Complete Genome	99.62	0.82	8098788	8069256	72	6	HQ	PRJNA982065	SAMN35684918
GCF_030450125.1	Streptomyces sp. WP-1	Streptomyces	sp.	OK	Complete Genome	100	0.06	7618767	7618767	72	1	HQ	PRJNA956720	SAMN34229410
GCF_030486425.1	Nocardia sp. PE-7	Nocardia	sp.	OK	Complete Genome	98.74	4.23	7357725	7288869	67.5	2	HQ	PRJNA989635	SAMN36177215
GCF_030490385.1	Rhodococcus ruber	Rhodococcus	ruber	OK	Complete Genome	98.93	0.4	5948089	5516353	70.5	5	HQ	PRJNA991437	SAMN36292739
GCF_030506235.1	Streptomyces sp. JUS-F4	Streptomyces	sp.	OK	Complete Genome	97.16	0.32	8363333	8363333	71.5	1	HQ	PRJNA847514	SAMN28936916
GCF_030519385.1	Micromonospora sp. C28ISP2-4	Micromonospora	sp.	OK	Contig	93.82	0.91	6080419	601721	73	14	MQ	PRJNA990985	SAMN36287556
GCF_030520245.1	Streptomyces sp. VNUA116	Streptomyces	sp.	OK	Complete Genome	99.62	1.94	8306919	8306919	72.5	1	HQ	PRJNA939376	SAMN36470848
GCF_030544505.1	Streptomyces sp. SNU607	Streptomyces	sp.	OK	Complete Genome	99.91	0.47	6902589	6850319	71	4	HQ	PRJNA613161	SAMN14395401
GCF_030550835.1	Rhodococcus aetherivorans	Rhodococcus	aetherivorans	OK	Complete Genome	99.19	1.1	6543485	6037044	70.5	7	HQ	PRJNA995796	SAMN36505074
GCF_030551255.1	Streptomyces sp. NL15-2K	Streptomyces	sp.	OK	Complete Genome	99.91	0.95	12397421	12347483	70.5	3	HQ	PRJNA995553	SAMN36490031
GCF_030552875.1	Streptomyces sp. HUAS CX7	Streptomyces	sp.	OK	Complete Genome	100	0.51	8145614	8089089	72	2	HQ	PRJNA996354	SAMN36552123
GCF_030553055.1	Streptomyces sp. XD-27	Streptomyces	sp.	OK	Complete Genome	94.12	0.87	7549390	7549390	72	1	HQ	PRJNA996314	SAMN36537364
GCF_030656675.1	Rhodococcus opacus	Rhodococcus	opacus	OK	Complete Genome	99.59	2.57	9796491	8028325	67	4	HQ	PRJNA999064	SAMN36719889
GCF_030709715.1	Nocardia nova	Nocardia	nova	OK	Contig	99.23	2.42	7448860	664350	68	36	MQ	PRJNA975069	SAMN35311673
GCF_030719215.1	Streptomyces glycanivorans	Streptomyces	glycanivorans	OK	Complete Genome	99.19	0	8654387	8355599	70.5	5	HQ	PRJNA942517	SAMN33694647
GCF_030719235.1	Streptomyces poriferorum	Streptomyces	poriferorum	OK	Complete Genome	100	0.38	9616002	9515779	70.5	2	HQ	PRJNA942517	SAMN33694646
GCF_030719255.1	Streptomyces poriferorum	Streptomyces	poriferorum	OK	Complete Genome	100	0	9456810	9111196	70.5	2	HQ	PRJNA942517	SAMN33694645
GCF_030719295.1	Streptomyces castrisilvae	Streptomyces	castrisilvae	OK	Complete Genome	99.91	1.07	7990879	7646342	72	4	HQ	PRJNA942517	SAMN33694643
GCF_030736795.1	Micromonospora profundi	Micromonospora	profundi	OK	Complete Genome	97.13	3.99	6903980	6903980	71	1	HQ	PRJNA994917	SAMN36452542
GCF_030813695.1	Kitasatospora herbaricolor	Kitasatospora	herbaricolor	OK	Contig	97.29	2.15	9581307	9186014	73.5	3	MQ	PRJNA708454	SAMN18243429
GCF_030863865.1	Streptomyces rochei	Streptomyces	rochei	OK	Complete Genome	100	0	8181137	8030667	72.5	2	HQ	PRJNA950227	SAMN33980231
GCF_030863945.1	Streptomyces sp. FXY-T5	Streptomyces	sp.	OK	Complete Genome	99.21	0.57	8712266	8712266	71.5	1	HQ	PRJNA1000191	SAMN36761898
GCF_030916465.1	Rhodococcus sp. AH-ZY2	Rhodococcus	sp.	OK	Complete Genome	99.02	1.06	6273260	5635159	70	4	HQ	PRJNA973270	SAMN35126420
GCF_030930975.1	Streptomyces sp. VNUA74	Streptomyces	sp.	OK	Complete Genome	100	0.38	7250076	7250076	72.5	1	HQ	PRJNA939376	SAMN36510136
GCF_030979975.1	Rhodococcus pyridinivorans	Rhodococcus	pyridinivorans	OK	Complete Genome	97.58	3.28	5098433	5098433	68	1	HQ	PRJNA1008363	SAMN37117483
GCF_031082045.1	Pseudonocardia alni	Pseudonocardia	alni	OK	Contig	92.94	4.58	6462644	5338192	74	5	MQ	PRJNA954151	SAMN34135175
GCF_031348265.1	Streptomyces collinus	Streptomyces	collinus	OK	Complete Genome	99.62	0	8867154	8867154	71.5	1	HQ	PRJNA1011445	SAMN37218762
GCF_031455225.1	Saccharothrix longispora	Saccharothrix	longispora	OK	Contig	99.83	1.66	8375440	8375440	73	1	MQ	PRJNA708474	SAMN18243604
GCF_031457585.1	Nocardia kruczakiae	Nocardia	kruczakiae	OK	Contig	99.18	1.75	7431245	598849	68	32	MQ	PRJNA709214	SAMN18244808
GCF_031583065.1	Streptomyces sp. CGMCC 4.7035	Streptomyces	sp.	OK	Complete Genome	99.81	0.76	8088797	8088797	70.5	1	HQ	PRJNA994314	SAMN36425926
GCF_031593255.1	Streptomyces janthinus	Streptomyces	janthinus	OK	Complete Genome	100	0.66	9451924	9361893	70.5	2	HQ	PRJNA1014812	SAMN37342211
GCF_031597775.1	Streptomyces sp. BB1-1-1	Streptomyces	sp.	OK	Complete Genome	99.62	1.23	9265388	8788812	71.5	3	HQ	PRJNA1015137	SAMN37346763
GCF_031679605.1	Streptomyces luomodiensis	Streptomyces	luomodiensis	OK	Complete Genome	99.15	1.52	10044493	10044493	71.5	1	HQ	PRJNA695128	SAMN33010715
GCF_031763325.1	Rhodococcus sp. SG20037	Rhodococcus	sp.	OK	Complete Genome	99.48	0	6359223	6359223	62.5	1	HQ	PRJNA1013749	SAMN37309689
GCF_031767055.1	Streptomyces sp. CGMCC 4.1456	Streptomyces	sp.	OK	Complete Genome	99.62	0.85	8364065	8364065	71	1	HQ	PRJNA1015348	SAMN37354673
GCF_031844685.1	Streptomyces sp. ITFR-21	Streptomyces	sp.	OK	Complete Genome	98.39	1.92	7355187	6873291	72.5	4	HQ	PRJNA1015143	SAMN37346829
GCF_031844705.1	Streptomyces sp. ITFR-16	Streptomyces	sp.	OK	Complete Genome	99.57	0.13	8119553	7902135	71.5	3	HQ	PRJNA1015143	SAMN37346828
GCF_031844725.1	Streptomyces sp. ITFR-6	Streptomyces	sp.	OK	Complete Genome	99.91	0.95	8751530	8343498	71	4	HQ	PRJNA1015143	SAMN37346827
GCF_032105745.1	Streptomyces sp. Li-HN-5-11	Streptomyces	sp.	OK	Complete Genome	99.02	1.4	9427803	9427803	71	1	HQ	PRJNA1017132	SAMN37388763
GCF_032110285.1	Kitasatospora sp. CM 4170	Kitasatospora	sp.	OK	Complete Genome	98.48	3.82	8817231	8817231	73.5	1	HQ	PRJNA1017958	SAMN37417026
GCF_032229305.1	Streptomyces sp. AM2-3-1	Streptomyces	sp.	OK	Complete Genome	100	0	9114769	9114769	69.5	1	HQ	PRJNA934748	SAMN37407965
GCF_032229325.1	Streptomyces sp. AM8-1-1	Streptomyces	sp.	OK	Complete Genome	100	0.85	8473713	8473713	70.5	1	HQ	PRJNA934748	SAMN37407964
GCF_032335455.1	Amycolatopsis sp. PS_44_ISF1	Amycolatopsis	sp.	OK	Contig	98.39	3.74	8336460	2727381	72	16	MQ	PRJNA873226	SAMN30492522
GCF_032423855.1	Rhodococcus qingshengii	Rhodococcus	qingshengii	OK	Scaffold	99.14	0.5	6730301	652151	62.5	27	MQ	PRJNA357052	SAMN06131803
GCF_032598905.1	Streptomyces sp. 11x1	Streptomyces	sp.	OK	Complete Genome	99.49	0.93	10672615	10541094	71	2	HQ	PRJNA950937	SAMN34024083
GCF_032656385.1	Nocardia canadensis	Nocardia	canadensis	OK	Contig	98.93	3.59	7150690	2014676	69.5	10	MQ	PRJNA1000911	SAMN36780630
GCF_032932555.1	Streptomyces fradiae	Streptomyces	fradiae	OK	Complete Genome	98.07	1.34	6724069	6724069	74.5	1	HQ	PRJNA1025251	SAMN37717168
GCF_032936355.1	Rhodococcus qingshengii	Rhodococcus	qingshengii	OK	Complete Genome	99.25	0.06	6435460	6306556	62.5	3	HQ	PRJNA1028302	SAMN37819405
GCF_033109485.1	Streptomyces cyaneofuscatus	Streptomyces	cyaneofuscatus	OK	Complete Genome	99.91	1.07	8117999	8117999	71.5	1	HQ	PRJNA1029342	SAMN37865769
GCF_033216215.1	Streptomyces coeruleorubidus	Streptomyces	coeruleorubidus	OK	Complete Genome	99.91	1.25	9323077	9090289	71	2	HQ	PRJNA816554	SAMN26681054
GCF_033335955.1	Streptomyces sp. N50	Streptomyces	sp.	OK	Complete Genome	97.52	0.38	11551937	10079986	70	2	HQ	PRJNA1029240	SAMN37864665
GCF_033343995.1	Streptomyces sp. HUAS YS2	Streptomyces	sp.	OK	Complete Genome	100	1.26	7875343	7875343	72	1	HQ	PRJNA1029460	SAMN37868380
GCF_033406955.1	Streptomyces violaceoruber	Streptomyces	violaceoruber	OK	Complete Genome	100	0	8629698	8629698	72	1	HQ	PRJNA1029468	SAMN37868432
GCF_033433935.1	Micromonospora sp. BRA006-A	Micromonospora	sp.	OK	Scaffold	98.52	2.03	6734612	297938	73	39	MQ	PRJNA659729	SAMN29586427
GCF_033441515.1	Amycolatopsis solani	Amycolatopsis	solani	OK	Contig	98.9	1.77	10277369	2762353	71.5	4	MQ	PRJNA1033207	SAMN38028110
GCF_033547115.1	Streptomyces malaysiensis	Streptomyces	malaysiensis	OK	Complete Genome	99.72	1.89	10971232	10971232	71	1	HQ	PRJNA1034529	SAMN38058950
GCF_033842605.1	Rhodococcus opacus	Rhodococcus	opacus	OK	Contig	99.59	4.49	9437007	7807144	67	16	MQ	PRJNA1037563	SAMN38186275
GCF_034054735.1	Streptomyces sp. CL7	Streptomyces	sp.	OK	Complete Genome	100	0.38	7764072	7305967	72.5	2	HQ	PRJNA1041604	SAMN38288788
GCF_034057835.1	Streptomyces sp. KN37	Streptomyces	sp.	OK	Complete Genome	100	0.82	9097371	8364061	71.5	3	HQ	PRJNA1035001	SAMN38080375
GCF_034300035.1	Streptomyces atratus	Streptomyces	atratus	OK	Complete Genome	100	0.38	9314038	9314038	69.5	1	HQ	PRJNA948557	SAMN33907027
GCF_034422375.1	Streptomyces rochei	Streptomyces	rochei	OK	Complete Genome	99.62	0.05	8597388	8597388	72.5	1	HQ	PRJNA1048154	SAMN38609434
GCF_034479045.1	Streptomyces albidoflavus	Streptomyces	albidoflavus	OK	Complete Genome	99.05	0.82	7131284	7131284	73.5	1	HQ	PRJNA1037563	SAMN38186272
GCF_034568915.1	Streptomyces goshikiensis	Streptomyces	goshikiensis	OK	Complete Genome	99.91	1.49	8229428	7432320	72.5	4	HQ	PRJNA1040336	SAMN38256362
GCF_034668605.1	Streptomyces sp. S584	Streptomyces	sp.	OK	Complete Genome	99.53	0	7855040	7855040	71	1	HQ	PRJNA1041709	SAMN38289759
GCF_034929455.1	Amycolatopsis sp., V23-08	Amycolatopsis	sp.,	OK	Contig	99.01	2.53	10833240	598490	71.5	41	MQ	PRJNA1056771	SAMN39107550
GCF_035578105.1	Streptomyces cyaneofuscatus	Streptomyces	cyaneofuscatus	OK	Complete Genome	99.53	1.06	7960197	7960197	71.5	1	HQ	PRJNA1041797	SAMN38299096
GCF_035658475.1	Streptomyces sp. CGMCC 4.1772	Streptomyces	sp.	OK	Complete Genome	99.24	0.28	8707722	8707722	71	1	HQ	PRJNA1060428	SAMN39229632
GCF_035818515.1	Nocardia sp. CDC153	Nocardia	sp.	OK	Scaffold	98.07	4.82	8218760	1278891	68	17	MQ	PRJNA1061336	SAMN39265390
GCF_035818795.1	Nocardia sp. CDC160	Nocardia	sp.	OK	Scaffold	97.77	4.42	8567919	1457015	67.5	22	MQ	PRJNA1061330	SAMN39265353
GCF_035917115.1	Streptomyces longwoodensis	Streptomyces	longwoodensis	Inconclusive	Complete Genome	99.5708	0.858369	7311561	7311561	73	1	HQ	PRJNA747871	SAMN24016246
GCF_035917135.1	Streptomyces sp. NBC_00481	Streptomyces	sp.	OK	Complete Genome	100	1.61	10379698	10379698	71	1	HQ	PRJNA747871	SAMN30553095
GCF_035917155.1	Streptomyces sp. NBC_00385	Streptomyces	sp.	OK	Complete Genome	99.62	0.13	8719657	8719657	71	1	HQ	PRJNA747871	SAMN30553054
GCF_035917175.1	Streptomyces sp. NBC_00243	Streptomyces	sp.	OK	Complete Genome	99.78	1.14	10658643	10658643	70	1	HQ	PRJNA747871	SAMN30552967
GCF_035917195.1	Streptomyces phaeochromogenes	Streptomyces	phaeochromogenes	OK	Complete Genome	99.46	0.76	12185415	12185415	70	1	HQ	PRJNA747871	SAMN30552944
GCF_035917215.1	Streptomyces sp. NBC_00151	Streptomyces	sp.	OK	Complete Genome	100	1.39	10670226	10670226	70.5	1	HQ	PRJNA747871	SAMN30552936
GCF_035917235.1	Streptomyces sp. NBC_01294	Streptomyces	sp.	OK	Complete Genome	100	0.76	8513219	8226482	72	2	HQ	PRJNA747871	SAMN24016495
GCF_035917255.1	Streptomyces sp. NBC_01257	Streptomyces	sp.	OK	Complete Genome	100	0.38	9191772	9191772	71	1	HQ	PRJNA747871	SAMN24016467
GCF_035917275.1	Streptomyces sp. NBC_01237	Streptomyces	sp.	OK	Complete Genome	99.91	1.7	10190356	8231337	70.5	4	HQ	PRJNA747871	SAMN24016452
GCF_035917295.1	Streptomyces sp. NBC_01022	Streptomyces	sp.	OK	Complete Genome	100	0.38	10339220	10110422	70.5	2	HQ	PRJNA747871	SAMN24016351
GCF_035917315.1	Streptomyces sp. NBC_00841	Streptomyces	sp.	OK	Complete Genome	99.53	2.37	11554491	9842396	69.5	3	HQ	PRJNA747871	SAMN30553256
GCF_045208415.1	Kitasatospora sp. NBC 01560	Kitasatospora	sp.	OK	Complete Genome	99.4737	1.22807	9652113	9652113	73.6	1	HQ	PRJNA747871	SAMN30553321
GCF_035917375.1	Micromonospora peucetia	Micromonospora	peucetia	OK	Complete Genome	100	1.31579	7189561	7189561	72.3	1	HQ	PRJNA747871	SAMN30553501
GCF_035917395.1	Streptomyces sp. NBC_01808	Streptomyces	sp.	OK	Complete Genome	99.81	0	8221997	8221997	73	1	HQ	PRJNA747871	SAMN30553500
GCF_035917415.1	Streptomyces sp. NBC_01803	Streptomyces	sp.	OK	Complete Genome	96.81	0.98	5847022	5847022	72.5	1	HQ	PRJNA747871	SAMN30553499
GCF_035917435.1	Streptomyces microflavus	Streptomyces	microflavus	OK	Complete Genome	99.91	0.49	8068458	8068458	71.5	1	HQ	PRJNA747871	SAMN30553495
GCF_045160625.1	Kitasatospora sp. NBC_00039	Kitasatospora	sp.	OK	Complete Genome	100	1.75439	9033265	8179846	72.9	2	HQ	PRJNA747871	SAMN24016150
GCF_035917495.1	Streptomyces sp. NBC_01800	Streptomyces	sp.	OK	Complete Genome	100	1.33	10117522	10117522	69.5	1	HQ	PRJNA747871	SAMN30553497
GCF_035917535.1	Streptomyces sp. NBC_01795	Streptomyces	sp.	OK	Complete Genome	99.78	1.33	9145559	8863644	71	2	HQ	PRJNA747871	SAMN30553493
GCF_035917575.1	Streptomyces sp. NBC_01788	Streptomyces	sp.	OK	Complete Genome	100	0.47	8269445	8269445	71.5	1	HQ	PRJNA747871	SAMN30553487
GCF_035917595.1	Streptomyces scopuliridis	Streptomyces	scopuliridis	OK	Complete Genome	99.12	0.32	9494495	9080322	70	3	HQ	PRJNA747871	SAMN30553486
GCF_035917655.1	Streptomyces anthocyanicus	Streptomyces	anthocyanicus	OK	Complete Genome	100	0	8876440	8677221	72	2	HQ	PRJNA747871	SAMN30553482
GCF_035917675.1	Streptomyces sp. NBC_01775	Streptomyces	sp.	OK	Complete Genome	99.4	1.33	9336717	9061594	71	2	HQ	PRJNA747871	SAMN30553481
GCF_035917695.1	Streptomyces decoyicus	Streptomyces	decoyicus	OK	Complete Genome	99.94	0.25	9270669	9270669	71	1	HQ	PRJNA747871	SAMN30553480
GCF_035917755.1	Streptomyces scopuliridis	Streptomyces	scopuliridis	OK	Complete Genome	99.12	0.51	9554255	9353470	70	3	HQ	PRJNA747871	SAMN30553477
GCF_035917795.1	Streptomyces brevispora	Streptomyces	brevispora	OK	Complete Genome	99.95	0.76	7883535	7883535	70.5	1	HQ	PRJNA747871	SAMN30553475
GCF_035917815.1	Streptomyces sp. NBC_01766	Streptomyces	sp.	OK	Complete Genome	99.78	1.7	8271519	7895716	70	3	HQ	PRJNA747871	SAMN30553472
GCF_035917835.1	Streptomyces sp. NBC_01768	Streptomyces	sp.	OK	Complete Genome	100	1.42	10497525	9791653	70.5	3	HQ	PRJNA747871	SAMN30553474
GCF_035917855.1	Streptomyces sp. NBC_01763	Streptomyces	sp.	OK	Complete Genome	100	0.43	9932863	9932863	69.5	1	HQ	PRJNA747871	SAMN30553470
GCF_035917875.1	Streptomyces sp. NBC_01762	Streptomyces	sp.	OK	Complete Genome	100	0.19	9829227	9829227	69.5	1	HQ	PRJNA747871	SAMN30553469
GCF_035917895.1	Streptomyces sp. NBC_01761	Streptomyces	sp.	OK	Complete Genome	100	0.38	9789246	9789246	69.5	1	HQ	PRJNA747871	SAMN30553468
GCF_035917915.1	Streptomyces anulatus	Streptomyces	anulatus	OK	Complete Genome	99.91	0	9115253	8723954	71.5	2	HQ	PRJNA747871	SAMN30553466
GCF_035917935.1	Streptomyces sp. NBC_01760	Streptomyces	sp.	OK	Complete Genome	100	0.36	9099298	9099298	69.5	1	HQ	PRJNA747871	SAMN30553467
GCF_035917955.1	Streptomyces virginiae	Streptomyces	virginiae	Inconclusive	Complete Genome	99.6441	1.77089	8952109	8809469	71.7	3	HQ	PRJNA747871	SAMN30553465
GCF_035918015.1	Streptomyces sp. NBC_01754	Streptomyces	sp.	OK	Complete Genome	99.48	0.28	7774921	7738802	71.5	2	HQ	PRJNA747871	SAMN30553461
GCF_035918035.1	Streptomyces hirsutus	Streptomyces	hirsutus	OK	Complete Genome	100	0.45	8843894	8843894	71	1	HQ	PRJNA747871	SAMN30553460
GCF_035918055.1	Streptomyces phaeochromogenes	Streptomyces	phaeochromogenes	OK	Complete Genome	99.46	1.7	12190075	12190075	70	1	HQ	PRJNA747871	SAMN30553459
GCF_035918075.1	Streptomyces sp. NBC_01751	Streptomyces	sp.	OK	Complete Genome	100	0.57	9848585	9848585	69.5	1	HQ	PRJNA747871	SAMN30553458
GCF_035918095.1	Streptomyces sp. NBC_01750	Streptomyces	sp.	OK	Complete Genome	100	0.96	8982053	8885979	69.5	3	HQ	PRJNA747871	SAMN30553457
GCF_035918115.1	Streptomyces cyaneofuscatus	Streptomyces	cyaneofuscatus	Inconclusive	Complete Genome	99.911	1.24555	7998820	7942995	71.5	2	HQ	PRJNA747871	SAMN30553456
GCF_035918155.1	Streptomyces sp. NBC_01591	Streptomyces	sp.	OK	Complete Genome	99.91	2.18	10251772	8806301	70	3	HQ	PRJNA747871	SAMN30553338
GCF_035918175.1	Streptomyces canus	Streptomyces	canus	Inconclusive	Complete Genome	99.8927	0.357654	11347797	11078578	70.2	2	HQ	PRJNA747871	SAMN30553334
GCF_035918195.1	Streptomyces sp. NBC_01558	Streptomyces	sp.	OK	Complete Genome	100	0.47	9394305	8555638	71.5	3	HQ	PRJNA747871	SAMN30553320
GCF_035918215.1	Streptomyces sp. NBC_01474	Streptomyces	sp.	OK	Complete Genome	99.62	2.89	10569674	10569674	70	1	HQ	PRJNA747871	SAMN24016614
GCF_035918235.1	Streptomyces sp. NBC_01445	Streptomyces	sp.	OK	Complete Genome	99.53	1.37	11470199	10433345	70	2	HQ	PRJNA747871	SAMN24016597
GCF_035918275.1	Rhodococcus sp. PD04	Rhodococcus	sp.	OK	Complete Genome	99.11	1.01	6073555	5307844	68	3	HQ	PRJNA1055265	SAMN38987504
GCF_035918295.1	Amycolatopsis rhabdoformis	Amycolatopsis	rhabdoformis	OK	Complete Genome	98.07	3.34	10405981	10405981	71	1	HQ	PRJNA978978	SAMN38770662
GCF_035919765.1	Streptomyces globisporus	Streptomyces	globisporus	OK	Complete Genome	99.86	0.08	8089848	7857971	71.5	2	HQ	PRJNA747871	SAMN30553453
GCF_035920345.1	Nocardia vinacea	Nocardia	vinacea	Inconclusive	Complete Genome	99.7494	4.62235	10358337	10358337	65.4	1	HQ	PRJNA747871	SAMN30553451
GCF_045160805.1	Kitasatospora sp. NBC_00085	Kitasatospora	sp.	OK	Complete Genome	100	1.22807	9219708	9219708	72.8	1	HQ	PRJNA747871	SAMN24016157
GCF_035920385.1	Micromonospora sp. NBC_01739	Micromonospora	sp.	OK	Complete Genome	92.62	4.09	6230050	6230050	70.5	1	HQ	PRJNA747871	SAMN30553448
GCF_035920425.1	Micromonospora ureilytica	Micromonospora	ureilytica	OK	Complete Genome	98.39	3.41	7330286	7330286	71	1	HQ	PRJNA747871	SAMN30553444
GCF_041435235.1	Kitasatospora sp. NBC_01300	Kitasatospora	sp.	Inconclusive	Complete Genome	99.4737	2.36842	9442829	7759265	73	5	HQ	PRJNA747871	SAMN24016501
GCF_035920465.1	Streptomyces sp. NBC_01727	Streptomyces	sp.	OK	Complete Genome	100	0.76	9860799	9007015	69.5	3	HQ	PRJNA747871	SAMN30553440
GCF_035940175.1	Kitasatospora papulosa	Kitasatospora	papulosa	OK	Complete Genome	99.91	0.09	7648620	7648620	71	1	HQ	PRJNA747871	SAMN24016529
GCF_035943135.1	Streptomyces sp. NBC_01343	Streptomyces	sp.	OK	Complete Genome	99.91	1.8	8981933	8297176	72	2	HQ	PRJNA747871	SAMN24016528
GCF_035946055.1	Streptomyces sp. NBC_01341	Streptomyces	sp.	OK	Complete Genome	100	0	7411387	7411387	70.5	1	HQ	PRJNA747871	SAMN24016527
GCF_035949105.1	Streptomyces sp. NBC_01340	Streptomyces	sp.	OK	Complete Genome	100	1.7	12015560	10308083	70	2	HQ	PRJNA747871	SAMN24016526
GCF_035950875.1	Streptomyces cyaneofuscatus	Streptomyces	cyaneofuscatus	Inconclusive	Complete Genome	99.911	0.635486	8429929	8429929	71.5	1	HQ	PRJNA747871	SAMN24016525
GCF_035951655.1	Streptomyces platensis	Streptomyces	platensis	OK	Complete Genome	99.84	0.33	8811944	8811944	71	1	HQ	PRJNA747871	SAMN24016524
GCF_035952475.1	Streptomyces sp. NBC_01336	Streptomyces	sp.	OK	Complete Genome	100	0.57	9576147	9576147	70.5	1	HQ	PRJNA747871	SAMN24016523
GCF_035953295.1	Streptomyces sp. NBC_01335	Streptomyces	sp.	OK	Complete Genome	99.62	1.83	8361142	8204033	72	4	HQ	PRJNA747871	SAMN24016522
GCF_035954115.1	Streptomyces anulatus	Streptomyces	anulatus	OK	Complete Genome	99.91	0.13	8874522	8784835	71.5	2	HQ	PRJNA747871	SAMN24016520
GCF_035954955.1	Streptomyces murinus	Streptomyces	murinus	OK	Complete Genome	99.53	0.98	8550177	8550177	71.5	1	HQ	PRJNA747871	SAMN24016519
GCF_035955795.1	Streptomyces albidoflavus	Streptomyces	albidoflavus	OK	Complete Genome	99.43	0.69	7288318	7078426	73.5	2	HQ	PRJNA747871	SAMN24016518
GCF_035956715.1	Nocardia sp. NBC_01329	Nocardia	sp.	OK	Complete Genome	97.33	2.27	6420957	6420957	67	1	HQ	PRJNA747871	SAMN24016517
GCF_035957715.1	Streptomyces phaeochromogenes	Streptomyces	phaeochromogenes	OK	Complete Genome	99.46	0.51	11713170	11713170	70	1	HQ	PRJNA747871	SAMN24016516
GCF_035958815.1	Nocardia sp. NBC_01327	Nocardia	sp.	OK	Complete Genome	97.74	4.55	9376595	9083790	66.5	2	HQ	PRJNA747871	SAMN24016515
GCF_035959875.1	Streptomyces subrutilus	Streptomyces	subrutilus	OK	Complete Genome	99.15	0.82	7823131	7646701	73.5	4	HQ	PRJNA747871	SAMN24016514
GCF_035960815.1	Streptomyces sp. NBC_01324	Streptomyces	sp.	OK	Complete Genome	99.91	1.33	8379700	8003226	71	3	HQ	PRJNA747871	SAMN24016513
GCF_035961655.1	Streptomyces sp. NBC_01317	Streptomyces	sp.	OK	Complete Genome	99.57	0.97	8066947	8066947	71	1	HQ	PRJNA747871	SAMN24016509
GCF_035962435.1	Streptomyces europaeiscabiei	Streptomyces	europaeiscabiei	Inconclusive	Complete Genome	100	0.965665	11671850	11421100	70.6	2	HQ	PRJNA747871	SAMN30553445
GCF_035974335.1	Streptomyces sp. NBC_01321	Streptomyces	sp.	OK	Complete Genome	100	0.38	8221523	8066451	70	2	HQ	PRJNA747871	SAMN24016512
GCF_035974355.1	Streptomyces sp. NBC_01318	Streptomyces	sp.	OK	Complete Genome	100	1.33	9805183	9805183	69.5	1	HQ	PRJNA747871	SAMN24016510
GCF_035974375.1	Streptomyces sp. NBC_01320	Streptomyces	sp.	OK	Complete Genome	100	4.73	12556891	11940402	69.5	2	HQ	PRJNA747871	SAMN24016511
GCF_035975855.1	Streptomyces sp. NBC_01304	Streptomyces	sp.	OK	Complete Genome	99.85	2.06	10989260	10658997	70	4	HQ	PRJNA747871	SAMN24016503
GCF_035976515.1	Kitasatospora sp. NBC_01302	Kitasatospora	sp.	OK	Complete Genome	98.48	3.09	9359098	9102910	72.5	4	HQ	PRJNA747871	SAMN24016502
GCF_035977975.1	Streptomyces celluloflavus	Streptomyces	celluloflavus	OK	Complete Genome	99.94	2.75	9247450	9247450	71.5	1	HQ	PRJNA747871	SAMN24016500
GCF_035978755.1	Streptomyces sp. NBC_01298	Streptomyces	sp.	OK	Complete Genome	100	1.93	9695021	9032271	71.5	5	HQ	PRJNA747871	SAMN24016499
GCF_035979555.1	Streptomyces tubercidicus	Streptomyces	tubercidicus	OK	Complete Genome	99.94	0.95	8552987	8552987	70.5	1	HQ	PRJNA747871	SAMN24016498
GCF_035980495.1	Kitasatospora papulosa	Kitasatospora	papulosa	OK	Complete Genome	99.91	0.57	7559771	7559771	71	1	HQ	PRJNA747871	SAMN24016496
GCF_035981415.1	Micromonospora maris	Micromonospora	maris	OK	Complete Genome	93.32	4.84	6668972	6668972	71	1	HQ	PRJNA747871	SAMN24016494
GCF_035982055.1	Streptomyces sp. NBC_01288	Streptomyces	sp.	OK	Complete Genome	100	0.57	10558057	10558057	70	1	HQ	PRJNA747871	SAMN24016492
GCF_035982555.1	Amycolatopsis sp. NBC_01286	Amycolatopsis	sp.	OK	Complete Genome	98.85	2.18	10662691	10622967	71.5	2	HQ	PRJNA747871	SAMN24016490
GCF_035983575.1	Streptomyces sp. NBC_01281	Streptomyces	sp.	OK	Complete Genome	99.53	0.69	9885581	9452090	71	3	HQ	PRJNA747871	SAMN24016487
GCF_035983595.1	Streptomyces sp. NBC_01334	Streptomyces	sp.	OK	Complete Genome	99.91	1.23	10608739	10047871	71	2	HQ	PRJNA747871	SAMN24016521
GCF_035984415.1	Streptomyces sp. NBC_01296	Streptomyces	sp.	OK	Complete Genome	100	1.06	9383688	8855236	71.5	2	HQ	PRJNA747871	SAMN24016497
GCF_035987325.1	Streptomyces sp. NBC_01244	Streptomyces	sp.	OK	Complete Genome	100	1.2	10001243	9513468	71.5	3	HQ	PRJNA747871	SAMN24016459
GCF_035988225.1	Streptomyces sp. NBC_01243	Streptomyces	sp.	OK	Complete Genome	100	1.33	10321034	9294343	70.5	3	HQ	PRJNA747871	SAMN24016458
GCF_035988865.1	Streptomyces sp. NBC_01240	Streptomyces	sp.	OK	Complete Genome	99.62	0.38	9069560	8674336	70	4	HQ	PRJNA747871	SAMN24016455
GCF_035989285.1	Streptomyces sp. NBC_01235	Streptomyces	sp.	OK	Complete Genome	99.91	0.57	11090044	11090044	71	1	HQ	PRJNA747871	SAMN24016450
GCF_035989305.1	Streptomyces sp. NBC_01233	Streptomyces	sp.	OK	Complete Genome	99.91	1.61	10336409	10187596	71.5	4	HQ	PRJNA747871	SAMN24016449
GCF_035989885.1	Streptomyces sp. NBC_01232	Streptomyces	sp.	OK	Complete Genome	100	0.57	8834773	8660092	72	3	HQ	PRJNA747871	SAMN24016448
GCF_035991205.1	Streptomyces zaomyceticus	Streptomyces	zaomyceticus	OK	Complete Genome	99.43	0.62	9766476	9358130	71.5	4	HQ	PRJNA747871	SAMN24016445
GCF_035991645.1	Streptomyces sp. NBC_01230	Streptomyces	sp.	OK	Complete Genome	100	0.32	10201169	9518240	69.5	2	HQ	PRJNA747871	SAMN24016446
GCF_035993425.1	Streptomyces sp. NBC_01218	Streptomyces	sp.	OK	Complete Genome	99.53	0	7171588	7116718	72	2	HQ	PRJNA747871	SAMN24016440
GCF_035994185.1	Streptomyces sp. NBC_01217	Streptomyces	sp.	OK	Complete Genome	100	0.76	9034013	8890693	70	2	HQ	PRJNA747871	SAMN24016439
GCF_035994945.1	Streptomyces sp. NBC_01216	Streptomyces	sp.	OK	Complete Genome	99.56	2.3	7718607	7127401	71.5	4	HQ	PRJNA747871	SAMN24016438
GCF_035996785.1	Streptomyces sp. NBC_01236	Streptomyces	sp.	OK	Complete Genome	99.86	2.77	11360030	11360030	70	1	HQ	PRJNA747871	SAMN24016451
GCF_036002945.1	Streptomyces sp. NBC_01224	Streptomyces	sp.	OK	Complete Genome	100	0.76	10014434	9662892	69.5	2	HQ	PRJNA747871	SAMN24016443
GCF_036006205.1	Streptomyces xinghaiensis	Streptomyces	xinghaiensis	OK	Complete Genome	98.96	0.57	6900143	6900143	73	1	HQ	PRJNA747871	SAMN24016437
GCF_036010285.1	Streptomyces sp. NBC_01212	Streptomyces	sp.	OK	Complete Genome	100	0	8231656	8231656	70.5	1	HQ	PRJNA747871	SAMN24016434
GCF_036010305.1	Streptomyces globisporus	Streptomyces	globisporus	OK	Complete Genome	99.86	0	7862506	7585586	71.5	3	HQ	PRJNA747871	SAMN24016433
GCF_036010325.1	Streptomyces sp. NBC_01210	Streptomyces	sp.	OK	Complete Genome	100	1.23	9208508	9076647	69.5	2	HQ	PRJNA747871	SAMN24016432
GCF_036010345.1	Streptomyces sp. NBC_01208	Streptomyces	sp.	OK	Complete Genome	100	0	8432930	8182248	70.5	3	HQ	PRJNA747871	SAMN24016431
GCF_036010365.1	Streptomyces sp. NBC_01207	Streptomyces	sp.	OK	Complete Genome	100	2.32	10807193	10443073	71	3	HQ	PRJNA747871	SAMN24016430
GCF_036010385.1	Streptomyces sp. NBC_01205	Streptomyces	sp.	OK	Complete Genome	99.53	1.88	9485036	8618493	71.5	4	HQ	PRJNA747871	SAMN24016429
GCF_036010405.1	Kitasatospora purpeofusca	Kitasatospora	purpeofusca	OK	Complete Genome	98.71	3.03	9762028	9762028	73.5	1	HQ	PRJNA747871	SAMN24016428
GCF_036010425.1	Kitasatospora purpeofusca	Kitasatospora	purpeofusca	OK	Complete Genome	98.3	4.17	10064253	9809889	73	3	HQ	PRJNA747871	SAMN24016427
GCF_036010445.1	Streptomyces sp. NBC_01201	Streptomyces	sp.	OK	Complete Genome	99.62	0	8676936	8249142	70.5	2	HQ	PRJNA747871	SAMN24016426
GCF_036010465.1	Micromonospora ureilytica	Micromonospora	ureilytica	OK	Complete Genome	98.39	3.51	7366692	7366692	71	1	HQ	PRJNA747871	SAMN24016425
GCF_045040525.1	Kitasatospora sp. NBC_01539	Kitasatospora	sp.	OK	Complete Genome	99.4737	0.350877	9364696	9364696	73.8	1	HQ	PRJNA747871	SAMN24016649
GCF_036010505.1	Streptomyces sp. NBC_01197	Streptomyces	sp.	OK	Complete Genome	99.87	1.8	7708294	7627830	70	2	HQ	PRJNA747871	SAMN24016423
GCF_036010525.1	Streptomyces anulatus	Streptomyces	anulatus	OK	Complete Genome	99.91	0	8752978	8653151	71.5	2	HQ	PRJNA747871	SAMN24016422
GCF_036010565.1	Streptomyces chartreusis	Streptomyces	chartreusis	OK	Complete Genome	100	1.26	11080497	11080497	70.5	1	HQ	PRJNA747871	SAMN24016189
GCF_036010585.1	Streptomyces microflavus	Streptomyces	microflavus	OK	Complete Genome	99.91	1.35	8956073	8546813	71	2	HQ	PRJNA747871	SAMN24016420
GCF_036010605.1	Streptomyces sp. NBC_00145	Streptomyces	sp.	OK	Complete Genome	99.49	2.32	11051430	11051430	70	1	HQ	PRJNA747871	SAMN30552933
GCF_036010625.1	Streptomyces goshikiensis	Streptomyces	goshikiensis	OK	Complete Genome	99.53	2.21	8756223	7984255	72	3	HQ	PRJNA747871	SAMN24016419
GCF_036010645.1	Streptomyces sp. NBC_00053	Streptomyces	sp.	OK	Complete Genome	100	1.23	10076411	9039762	70.5	3	HQ	PRJNA747871	SAMN30552886
GCF_036013045.1	Streptomyces sp. NBC_01186	Streptomyces	sp.	OK	Complete Genome	99.78	1.7	9174813	8907583	71	2	HQ	PRJNA747871	SAMN24016415
GCF_036013545.1	Streptomyces sp. NBC_00498	Streptomyces	sp.	OK	Complete Genome	99.91	0.38	10072442	10072442	70.5	1	HQ	PRJNA747871	SAMN30553103
GCF_036013565.1	Streptomyces europaeiscabiei	Streptomyces	europaeiscabiei	Inconclusive	Complete Genome	100	0.139485	11324247	10906898	70.4	2	HQ	PRJNA747871	SAMN24016237
GCF_036013585.1	Streptomyces sp. NBC_00496	Streptomyces	sp.	OK	Complete Genome	99.62	4.92	11851102	11851102	71	1	HQ	PRJNA747871	SAMN24016236
GCF_036013605.1	Streptomyces europaeiscabiei	Streptomyces	europaeiscabiei	Inconclusive	Complete Genome	100	1.01931	11363729	11363729	70.4	1	HQ	PRJNA747871	SAMN30553102
GCF_036013645.1	Streptomyces sp. NBC_00490	Streptomyces	sp.	OK	Complete Genome	99.62	0.05	10798493	10567976	70.5	2	HQ	PRJNA747871	SAMN24016235
GCF_036013665.1	Streptomyces sp. NBC_00487	Streptomyces	sp.	OK	Complete Genome	100	0.76	10744805	10744805	71	1	HQ	PRJNA747871	SAMN24016233
GCF_036013685.1	Streptomyces sp. NBC_00485	Streptomyces	sp.	OK	Complete Genome	99.81	0.95	10072122	10072122	70	1	HQ	PRJNA747871	SAMN30553099
GCF_036013705.1	Streptomyces sp. NBC_00484	Streptomyces	sp.	OK	Complete Genome	99.91	0.76	10525887	10525887	70.5	1	HQ	PRJNA747871	SAMN30553098
GCF_036013725.1	Kribbella sp. NBC_00482	Kribbella	sp.	OK	Complete Genome	99.09	3.78	9014418	9014418	68	1	HQ	PRJNA747871	SAMN30553096
GCF_036013745.1	Streptomyces sp. NBC_00483	Streptomyces	sp.	OK	Complete Genome	99.91	0.38	10237418	10237418	70.5	1	HQ	PRJNA747871	SAMN30553097
GCF_036013765.1	Streptomyces europaeiscabiei	Streptomyces	europaeiscabiei	Inconclusive	Complete Genome	100	1.26013	11915655	11915655	70.3	1	HQ	PRJNA747871	SAMN30553094
GCF_036013785.1	Streptomyces tubercidicus	Streptomyces	tubercidicus	OK	Complete Genome	99.94	1.04	8649157	8649157	70.5	1	HQ	PRJNA747871	SAMN24016232
GCF_036013815.1	Streptomyces decoyicus	Streptomyces	decoyicus	OK	Complete Genome	99.94	0.38	9265987	9236847	71	2	HQ	PRJNA747871	SAMN24016231
GCF_036013835.1	Streptomyces nojiriensis	Streptomyces	nojiriensis	OK	Complete Genome	100	2.59	10131194	9844630	71.5	2	HQ	PRJNA747871	SAMN24016230
GCF_036013855.1	Micromonospora zamorensis	Micromonospora	zamorensis	OK	Complete Genome	98.21	3.56	7062893	7062893	71	1	HQ	PRJNA747871	SAMN30553090
GCF_036013875.1	Micromonospora aurantiaca	Micromonospora	aurantiaca	OK	Complete Genome	98.87	1.03	6794508	6794508	73	1	HQ	PRJNA747871	SAMN30553089
GCF_036013895.1	Streptomyces sp. NBC_00467	Streptomyces	sp.	OK	Complete Genome	99.62	0.25	8760989	8364747	70	2	HQ	PRJNA747871	SAMN30553088
GCF_036013915.1	Streptomyces sp. NBC_00464	Streptomyces	sp.	OK	Complete Genome	100	0.19	8961255	8474698	70.5	3	HQ	PRJNA747871	SAMN30553086
GCF_036013935.1	Streptomyces sp. NBC_00461	Streptomyces	sp.	OK	Complete Genome	99.91	0.57	10374860	10374860	70	1	HQ	PRJNA747871	SAMN30553085
GCF_036013955.1	Streptomyces sp. NBC_00459	Streptomyces	sp.	OK	Complete Genome	99.91	0	9763010	9763010	70	1	HQ	PRJNA747871	SAMN30553084
GCF_036013975.1	Kitasatospora sp. NBC_00458	Kitasatospora	sp.	OK	Complete Genome	97.48	1.47	8011000	8011000	74	1	HQ	PRJNA747871	SAMN24016228
GCF_036014015.1	Streptomyces sp. NBC_00457	Streptomyces	sp.	OK	Complete Genome	99.62	0.51	10802565	10802565	70	1	HQ	PRJNA747871	SAMN30553083
GCF_036014035.1	Streptomyces sp. NBC_00455	Streptomyces	sp.	OK	Complete Genome	99.49	3.16	8472041	8145942	70	2	HQ	PRJNA747871	SAMN24016227
GCF_036014055.1	Streptomyces violaceus	Streptomyces	violaceus	OK	Complete Genome	99.91	0.47	9449196	9449196	71	1	HQ	PRJNA747871	SAMN30553082
GCF_036014075.1	Streptomyces violaceus	Streptomyces	violaceus	OK	Complete Genome	100	0.47	9003480	8918193	71	2	HQ	PRJNA747871	SAMN24016225
GCF_036014095.1	Streptomyces sp. NBC_00453	Streptomyces	sp.	OK	Complete Genome	99.91	0.95	10089300	10089300	70.5	1	HQ	PRJNA747871	SAMN24016226
GCF_045207365.1	Micromonospora sp. NBC 00858	Micromonospora	sp.	OK	Complete Genome	100	1.49123	7748626	7748626	71.4	1	HQ	PRJNA747871	SAMN30553266
GCF_036014135.1	Streptomyces sp. NBC_00445	Streptomyces	sp.	OK	Complete Genome	99.62	1.4	11121119	10757571	70	2	HQ	PRJNA747871	SAMN30553079
GCF_036014155.1	Streptomyces sp. NBC_00444	Streptomyces	sp.	OK	Complete Genome	99.62	0.69	10787473	10787473	70	1	HQ	PRJNA747871	SAMN30553078
GCF_036014175.1	Streptomyces sp. NBC_00443	Streptomyces	sp.	OK	Complete Genome	95.25	0.19	9449954	9449954	70.5	1	HQ	PRJNA747871	SAMN30553077
GCF_036014195.1	Streptomyces sp. NBC_00442	Streptomyces	sp.	OK	Complete Genome	99.24	0.79	7725772	7725772	71.5	1	HQ	PRJNA747871	SAMN24016223
GCF_036014215.1	Streptomyces sp. NBC_00440	Streptomyces	sp.	OK	Complete Genome	99.31	3.63	8684552	8402968	70	2	HQ	PRJNA747871	SAMN30553075
GCF_036014235.1	Streptomyces sp. NBC_00435	Streptomyces	sp.	OK	Complete Genome	99.57	1.1	8101613	7923365	71.5	2	HQ	PRJNA747871	SAMN24016220
GCF_036017915.1	Micromonospora sp. NBC_00421	Micromonospora	sp.	OK	Complete Genome	95.43	4.83	7231838	7231838	72.5	1	HQ	PRJNA747871	SAMN30553071
GCF_036026695.1	Amycolatopsis sp. NBC_00438	Amycolatopsis	sp.	OK	Complete Genome	98.66	1.57	10417451	10417451	71.5	1	HQ	PRJNA747871	SAMN24016221
GCF_036030735.1	Streptomyces sp. NBC_00425	Streptomyces	sp.	OK	Complete Genome	99.91	0.38	9805310	9805310	71.5	1	HQ	PRJNA747871	SAMN30553072
GCF_036032445.1	Nocardia sp. NBC_00416	Nocardia	sp.	OK	Complete Genome	96.8	2.51	7372728	7372728	68	1	HQ	PRJNA747871	SAMN30553069
GCF_036035005.1	Streptomyces zaomyceticus	Streptomyces	zaomyceticus	OK	Complete Genome	99.53	1.47	9485507	9360127	72	2	HQ	PRJNA747871	SAMN24016217
GCF_036038375.1	Streptomyces sp. NBC_00414	Streptomyces	sp.	OK	Complete Genome	99.75	0.76	10350652	10350652	70.5	1	HQ	PRJNA747871	SAMN30553068
GCF_036041405.1	Micromonospora zamorensis	Micromonospora	zamorensis	OK	Complete Genome	98.26	4.27	7516575	7313367	71	2	HQ	PRJNA747871	SAMN30553065
GCF_045207375.1	Micromonospora sp. NBC 00860	Micromonospora	sp.	OK	Complete Genome	100	1.31579	7475168	7475168	71.1	1	HQ	PRJNA747871	SAMN30553267
GCF_036048035.1	Streptomyces sp. NBC_00400	Streptomyces	sp.	OK	Complete Genome	99.94	0.63	8490789	8490789	71	1	HQ	PRJNA747871	SAMN30553061
GCF_036049935.1	Micromonospora zamorensis	Micromonospora	zamorensis	OK	Complete Genome	98.3	4.18	7492205	7492205	71	1	HQ	PRJNA747871	SAMN24016216
GCF_036051655.1	Nocardia puris	Nocardia	puris	OK	Complete Genome	99.1	4.88	8059414	8059414	69.5	1	HQ	PRJNA747871	SAMN30553058
GCF_036055215.1	Streptomyces sp. NBC_00391	Streptomyces	sp.	OK	Complete Genome	100	1.89	10628885	10628885	71	1	HQ	PRJNA747871	SAMN24016215
GCF_036057275.1	Streptomyces sp. NBC_00390	Streptomyces	sp.	OK	Complete Genome	99.91	0.93	8689288	8532829	70	2	HQ	PRJNA747871	SAMN30553057
GCF_045207895.1	Micromonospora sp. NBC 00898	Micromonospora	sp.	OK	Complete Genome	100	2.36842	7338496	7338496	72.3	1	HQ	PRJNA747871	SAMN30553288
GCF_045209745.1	Micromonospora sp. NBC 01638	Micromonospora	sp.	OK	Complete Genome	100	1.84211	6944955	6944955	70.6	1	HQ	PRJNA747871	SAMN30553374
GCF_036250065.1	Micromonospora sp. NBC 01699	Micromonospora	sp.	OK	Complete Genome	99.2982	0.263158	8280328	8280328	70.9	1	HQ	PRJNA747871	SAMN30553421
GCF_035920365.1	Micromonospora sp. NBC 01740	Micromonospora	sp.	OK	Complete Genome	100	1.84211	7317348	7317348	73.4	1	HQ	PRJNA747871	SAMN30553449
GCF_036061255.1	Streptomyces sp. NBC_00388	Streptomyces	sp.	OK	Complete Genome	99.4	0.38	6859429	6771125	71	2	HQ	PRJNA747871	SAMN30553056
GCF_036063235.1	Streptomyces sp. NBC_00386	Streptomyces	sp.	OK	Complete Genome	99.62	1.1	10193344	10193344	70.5	1	HQ	PRJNA747871	SAMN30553055
GCF_036067295.1	Kribbella sp. NBC_00382	Kribbella	sp.	OK	Complete Genome	97.24	3.78	8486922	8486922	67.5	1	HQ	PRJNA747871	SAMN30553052
GCF_036069355.1	Streptomyces mirabilis	Streptomyces	mirabilis	OK	Complete Genome	99.91	2.49	12912080	12912080	70	1	HQ	PRJNA747871	SAMN30553051
GCF_036073155.1	Streptomyces mirabilis	Streptomyces	mirabilis	OK	Complete Genome	99.91	1.7	11832677	11832677	70	1	HQ	PRJNA747871	SAMN30553049
GCF_036075115.1	Streptomyces sp. NBC_00377	Streptomyces	sp.	OK	Complete Genome	99.62	0.09	9238295	9195461	71.5	2	HQ	PRJNA747871	SAMN30553047
GCF_036077095.1	Streptomyces sp. NBC_00376	Streptomyces	sp.	OK	Complete Genome	99.91	1.8	10042916	8939048	70.5	3	HQ	PRJNA747871	SAMN30553046
GCF_036079075.1	Streptomyces platensis	Streptomyces	platensis	OK	Complete Genome	99.84	0.24	8873106	8873106	71	1	HQ	PRJNA747871	SAMN30553045
GCF_036082875.1	Streptomyces sp. NBC_00371	Streptomyces	sp.	OK	Complete Genome	99.62	3.46	11114350	11114350	70	1	HQ	PRJNA747871	SAMN30553043
GCF_036084755.1	Streptomyces sp. NBC_00370	Streptomyces	sp.	OK	Complete Genome	99.24	0.88	8601509	8601509	70.5	1	HQ	PRJNA747871	SAMN30553042
GCF_036086475.1	Nocardia cyriacigeorgica	Nocardia	cyriacigeorgica	OK	Complete Genome	99.51	1.72	6506653	6506653	68.5	1	HQ	PRJNA747871	SAMN30553041
GCF_036088315.1	Streptomyces sp. NBC_00344	Streptomyces	sp.	OK	Complete Genome	99.47	0.57	7063827	7001830	69.5	2	HQ	PRJNA747871	SAMN30553022
GCF_036091755.1	Streptomyces sp. NBC_00366	Streptomyces	sp.	OK	Complete Genome	99.72	1.04	9983749	9983749	70	1	HQ	PRJNA747871	SAMN30553039
GCF_036093575.1	Streptomyces europaeiscabiei	Streptomyces	europaeiscabiei	Inconclusive	Complete Genome	100	0.0536481	10850392	10757626	70.5	2	HQ	PRJNA747871	SAMN30553037
GCF_036095495.1	Micromonospora zamorensis	Micromonospora	zamorensis	OK	Complete Genome	97.97	3.85	7145141	7145141	71	1	HQ	PRJNA747871	SAMN30553035
GCF_036097425.1	Kribbella sp. NBC_00359	Kribbella	sp.	OK	Complete Genome	98.25	4.9	9068159	9068159	68.5	1	HQ	PRJNA747871	SAMN30553034
GCF_036099295.1	Streptomyces sp. NBC_00358	Streptomyces	sp.	OK	Complete Genome	100	1.8	9299130	9299130	71	1	HQ	PRJNA747871	SAMN30553033
GCF_036101175.1	Streptomyces coelicoflavus	Streptomyces	coelicoflavus	Inconclusive	Complete Genome	100	1.07296	8381442	7743741	71.8	4	HQ	PRJNA747871	SAMN30553032
GCF_036103115.1	Streptomyces sp. NBC_00356	Streptomyces	sp.	OK	Complete Genome	99.85	0.38	10384311	10384311	70.5	1	HQ	PRJNA747871	SAMN30553031
GCF_036104975.1	Amycolatopsis sp. NBC_00355	Amycolatopsis	sp.	OK	Complete Genome	98.33	2.24	10475789	10475789	71.5	1	HQ	PRJNA747871	SAMN30553030
GCF_036106915.1	Streptomyces sp. NBC_00354	Streptomyces	sp.	OK	Complete Genome	100	0.68	9087065	8827329	71.5	2	HQ	PRJNA747871	SAMN30553029
GCF_036108815.1	Streptomyces sp. NBC_00353	Streptomyces	sp.	OK	Complete Genome	100	0.89	9848962	9848962	69.5	1	HQ	PRJNA747871	SAMN30553028
GCF_036110805.1	Streptomyces canus	Streptomyces	canus	Inconclusive	Complete Genome	99.8927	1.18026	10659249	10435553	70.4	3	HQ	PRJNA747871	SAMN30553027
GCF_036118775.1	Streptomyces sp. NBC_00343	Streptomyces	sp.	OK	Complete Genome	99.95	0.28	10725031	10725031	70	1	HQ	PRJNA747871	SAMN30553021
GCF_036121075.1	Streptomyces sp. NBC_00342	Streptomyces	sp.	OK	Complete Genome	99.91	1.07	8949492	8501228	71	3	HQ	PRJNA747871	SAMN30553020
GCF_036124195.1	Streptomyces caniferus	Streptomyces	caniferus	OK	Complete Genome	100	0.63	8770135	8770135	71.5	1	HQ	PRJNA747871	SAMN30553016
GCF_036127095.1	Streptomyces sp. NBC_00335	Streptomyces	sp.	OK	Complete Genome	99.62	1.14	9002982	8706292	71.5	2	HQ	PRJNA747871	SAMN30553015
GCF_036130235.1	Streptomyces sp. NBC_00334	Streptomyces	sp.	OK	Complete Genome	100	0.76	8346247	7883130	72	3	HQ	PRJNA747871	SAMN30553014
GCF_036133475.1	Streptomyces phaeochromogenes	Streptomyces	phaeochromogenes	OK	Complete Genome	99.46	2.27	12600221	12600221	70	1	HQ	PRJNA747871	SAMN30553013
GCF_036136635.1	Micromonospora sp. NBC_00330	Micromonospora	sp.	OK	Complete Genome	98.06	3.45	7325679	7325679	71	1	HQ	PRJNA747871	SAMN24016213
GCF_036139655.1	Streptomyces sp. NBC_00328	Streptomyces	sp.	OK	Complete Genome	100	1.42	9971452	9971452	71	1	HQ	PRJNA747871	SAMN24016212
GCF_036142455.1	Nocardia salmonicida	Nocardia	salmonicida	OK	Complete Genome	98.76	3.32	7414253	7364775	67	2	HQ	PRJNA747871	SAMN30553012
GCF_036147535.1	Streptomyces sp. NBC_00322	Streptomyces	sp.	OK	Complete Genome	99.57	1.14	8572109	8572109	69.5	1	HQ	PRJNA747871	SAMN30553010
GCF_036150455.1	Nocardia salmonicida	Nocardia	salmonicida	OK	Complete Genome	99.03	2.95	7517952	7517952	67	1	HQ	PRJNA747871	SAMN30553009
GCF_036155935.1	Micromonospora zamorensis	Micromonospora	zamorensis	OK	Complete Genome	97.92	3.78	7168267	7168267	71	1	HQ	PRJNA747871	SAMN30553007
GCF_036158715.1	Streptomyces sp. NBC_00316	Streptomyces	sp.	OK	Complete Genome	100	1.56	9468941	8786883	70	2	HQ	PRJNA747871	SAMN30553006
GCF_035917455.1	Micromonospora sp. NBC 01796	Micromonospora	sp.	OK	Complete Genome	100	1.31579	8562983	8562983	70.6	1	HQ	PRJNA747871	SAMN30553494
GCF_036167175.1	Streptomyces caniferus	Streptomyces	caniferus	OK	Complete Genome	100	0.63	8944372	8944372	71.5	1	HQ	PRJNA747871	SAMN30553004
GCF_036169555.1	Streptomyces sp. NBC_00306	Streptomyces	sp.	OK	Complete Genome	100	0.13	8499733	8499733	70.5	1	HQ	PRJNA747871	SAMN30553002
GCF_036169715.1	Streptomyces sp. NBC_00304	Streptomyces	sp.	OK	Complete Genome	99.91	1.45	9077372	8797558	71	3	HQ	PRJNA747871	SAMN30553000
GCF_036170895.1	Streptomyces erythrochromogenes	Streptomyces	erythrochromogenes	Inconclusive	Complete Genome	99.6441	0.0706095	8598676	8498532	72.2	2	HQ	PRJNA747871	SAMN30552999
GCF_036172715.1	Streptomyces bobili	Streptomyces	bobili	OK	Complete Genome	100	0	9287515	9287515	71	1	HQ	PRJNA747871	SAMN30552998
GCF_036173045.1	Streptomyces sp. NBC_00299	Streptomyces	sp.	OK	Complete Genome	100	0.38	9730517	9507903	70.5	2	HQ	PRJNA747871	SAMN30552997
GCF_035917335.1	Micromonospora sp. NBC 01813	Micromonospora	sp.	OK	Complete Genome	98.9474	2.63158	7633203	7633203	70.5	1	HQ	PRJNA747871	SAMN30553504
GCF_036173105.1	Streptomyces sp. NBC_00287	Streptomyces	sp.	OK	Complete Genome	100	0.9	9642853	9642853	70	1	HQ	PRJNA747871	SAMN30552990
GCF_036173125.1	Streptomyces sp. NBC_00286	Streptomyces	sp.	OK	Complete Genome	99.72	1.07	9853519	9853519	69.5	1	HQ	PRJNA747871	SAMN30552989
GCF_036174265.1	Streptomyces sp. NBC_00285	Streptomyces	sp.	OK	Complete Genome	99.72	1.55	10309750	10263655	70	2	HQ	PRJNA747871	SAMN30552988
GCF_036175285.1	Streptomyces goshikiensis	Streptomyces	goshikiensis	OK	Complete Genome	99.91	1.87	8521284	7917856	72	2	HQ	PRJNA747871	SAMN30552987
GCF_036177905.1	Streptomyces canus	Streptomyces	canus	OK	Complete Genome	100	0.8	10825738	10691412	70	2	HQ	PRJNA747871	SAMN30552984
GCF_036178145.1	Streptomyces sp. NBC_00273	Streptomyces	sp.	OK	Complete Genome	100	2.1	10316149	10316149	71.5	1	HQ	PRJNA747871	SAMN24016206
GCF_036178565.1	Streptomyces sp. NBC_00272	Streptomyces	sp.	OK	Complete Genome	99.53	1.48	9157283	8667553	71.5	2	HQ	PRJNA747871	SAMN30552982
GCF_036178845.1	Streptomyces sp. NBC_00271	Streptomyces	sp.	OK	Complete Genome	99.91	2.18	12278258	11932113	70	3	HQ	PRJNA747871	SAMN30552981
GCF_036178885.1	Streptomyces caniferus	Streptomyces	caniferus	OK	Complete Genome	100	0.76	8971606	8848699	71.5	2	HQ	PRJNA747871	SAMN24016205
GCF_036178905.1	Streptomyces sp. NBC_00269	Streptomyces	sp.	OK	Complete Genome	99.62	2.13	10967080	10967080	70	1	HQ	PRJNA747871	SAMN30552980
GCF_036181125.1	Streptomyces europaeiscabiei	Streptomyces	europaeiscabiei	Inconclusive	Complete Genome	100	0	11766587	11766587	70.5	1	HQ	PRJNA747871	SAMN30552975
GCF_036181745.1	Streptomyces sp. NBC_00259	Streptomyces	sp.	OK	Complete Genome	99.53	1.48	8164743	8164743	71	1	HQ	PRJNA747871	SAMN24016203
GCF_036182465.1	Streptomyces sp. NBC_00258	Streptomyces	sp.	OK	Complete Genome	99.08	0.57	12223696	12223696	70	1	HQ	PRJNA747871	SAMN24016202
GCF_036183285.1	Streptomyces sp. NBC_00257	Streptomyces	sp.	OK	Complete Genome	99.62	1.43	9470289	9024940	70.5	2	HQ	PRJNA747871	SAMN30552974
GCF_036184225.1	Micromonospora globbae	Micromonospora	globbae	OK	Complete Genome	100	1.84211	6864289	6864289	73.4	1	HQ	PRJNA747871	SAMN30552973
GCF_036187565.1	Streptomyces sp. NBC_00252	Streptomyces	sp.	OK	Complete Genome	99.91	0.76	10137727	10137727	70.5	1	HQ	PRJNA747871	SAMN30552970
GCF_036188265.1	Streptomyces sp. NBC_00247	Streptomyces	sp.	OK	Complete Genome	99.59	0.19	7336920	7336920	71.5	1	HQ	PRJNA747871	SAMN30552968
GCF_036189065.1	Streptomyces jietaisiensis	Streptomyces	jietaisiensis	OK	Complete Genome	99.79	0.19	7520670	7520670	73	1	HQ	PRJNA747871	SAMN30553116
GCF_036189845.1	Streptomyces jietaisiensis	Streptomyces	jietaisiensis	OK	Complete Genome	99.84	0	7572860	7415029	72.5	3	HQ	PRJNA747871	SAMN30553115
GCF_036190545.1	Streptomyces jietaisiensis	Streptomyces	jietaisiensis	OK	Complete Genome	99.46	0	7637261	7637261	72.5	1	HQ	PRJNA747871	SAMN30553107
GCF_036191345.1	Streptomyces sp. NBC_00441	Streptomyces	sp.	OK	Complete Genome	99.62	0.38	7626967	7404206	71.5	2	HQ	PRJNA747871	SAMN30553076
GCF_036192275.1	Streptomyces sp. NBC_00250	Streptomyces	sp.	OK	Complete Genome	99.91	1.66	9270399	9158577	71.5	2	HQ	PRJNA747871	SAMN24016201
GCF_036194065.1	Streptomyces sp. NBC_00239	Streptomyces	sp.	OK	Complete Genome	99.62	1.83	9315054	8511476	72	5	HQ	PRJNA747871	SAMN24016198
GCF_036195045.1	Streptomyces sp. NBC_00236	Streptomyces	sp.	OK	Complete Genome	100	0.38	8333111	8333111	71	1	HQ	PRJNA747871	SAMN24016196
GCF_036195325.1	Streptomyces sp. NBC_00234	Streptomyces	sp.	OK	Complete Genome	100	0.19	8274316	8274316	70.5	1	HQ	PRJNA747871	SAMN24016195
GCF_036197725.1	Streptomyces canus	Streptomyces	canus	Inconclusive	Complete Genome	99.8927	0	11003475	11003475	70.2	1	HQ	PRJNA747871	SAMN30552962
GCF_036199905.1	Streptomyces sp. NBC_00223	Streptomyces	sp.	OK	Complete Genome	98.48	1.61	7961474	7961474	72	1	HQ	PRJNA747871	SAMN30552960
GCF_036200865.1	Kitasatospora purpeofusca	Kitasatospora	purpeofusca	OK	Complete Genome	97.73	3.18	9296031	9296031	73	1	HQ	PRJNA747871	SAMN30552959
GCF_036201705.1	Streptomyces sp. NBC_00208	Streptomyces	sp.	OK	Complete Genome	100	0.57	9856051	9856051	69.5	1	HQ	PRJNA747871	SAMN30552954
GCF_036202585.1	Streptomyces mirabilis	Streptomyces	mirabilis	OK	Complete Genome	99.91	2.3	12198498	12198498	70	1	HQ	PRJNA747871	SAMN24016186
GCF_036203305.1	Streptomyces sp. NBC_00190	Streptomyces	sp.	OK	Complete Genome	99.91	0.43	8893931	8633858	71.5	2	HQ	PRJNA747871	SAMN24016184
GCF_036204065.1	Streptomyces tauricus	Streptomyces	tauricus	OK	Complete Genome	99.75	0.95	10308633	10308633	70.5	1	HQ	PRJNA747871	SAMN24016183
GCF_036205185.1	Streptomyces sp. NBC_00184	Streptomyces	sp.	OK	Complete Genome	99.62	0.38	8400290	7406041	70.5	3	HQ	PRJNA747871	SAMN30552943
GCF_036206005.1	Streptomyces sp. NBC_00178	Streptomyces	sp.	OK	Complete Genome	100	0	7379407	7317043	71.5	2	HQ	PRJNA747871	SAMN30552942
GCF_036206925.1	Streptomyces anulatus	Streptomyces	anulatus	OK	Complete Genome	99.53	0.51	8526269	8526269	71.5	1	HQ	PRJNA747871	SAMN30552940
GCF_036207985.1	Streptomyces lydicus	Streptomyces	lydicus	OK	Complete Genome	99.91	1.89	8362496	8362496	72	1	HQ	PRJNA747871	SAMN30553197
GCF_036208025.1	Streptomyces sp. NBC_01601	Streptomyces	sp.	OK	Complete Genome	99.75	1.14	6984865	6514704	71.5	3	HQ	PRJNA747871	SAMN30553345
GCF_036208085.1	Streptomyces sp. NBC_00310	Streptomyces	sp.	OK	Complete Genome	100	0.76	10667068	10667068	71	1	HQ	PRJNA747871	SAMN24016209
GCF_036224405.1	Streptomyces jietaisiensis	Streptomyces	jietaisiensis	OK	Complete Genome	99.79	0.19	7531893	7531893	73	1	HQ	PRJNA747871	SAMN30553100
GCF_036226185.1	Streptomyces jietaisiensis	Streptomyces	jietaisiensis	OK	Complete Genome	99.84	0	7646405	7646405	72.5	1	HQ	PRJNA747871	SAMN30553093
GCF_036226305.1	Streptomyces violaceus	Streptomyces	violaceus	OK	Complete Genome	99.53	0.47	8816646	8816646	71	1	HQ	PRJNA747871	SAMN30552993
GCF_036059255.1	Micromonospora sp. NBC_00389	Micromonospora	sp.	OK	Complete Genome	98.9474	0.964912	7870275	7870275	71.3	1	HQ	PRJNA747871	SAMN24016214
GCF_036226385.1	Streptomyces sp. NBC_01261	Streptomyces	sp.	OK	Complete Genome	99.81	0.66	11585837	11585837	70	1	HQ	PRJNA747871	SAMN24016470
GCF_036226405.1	Streptomyces sp. NBC_01260	Streptomyces	sp.	OK	Complete Genome	99.91	0.57	9279395	9124354	70.5	3	HQ	PRJNA747871	SAMN24016469
GCF_036226425.1	Streptomyces caniferus	Streptomyces	caniferus	OK	Complete Genome	100	0.63	8867118	8867118	71.5	1	HQ	PRJNA747871	SAMN24016466
GCF_036226445.1	Streptomyces sp. NBC_01255	Streptomyces	sp.	OK	Complete Genome	99.91	0.63	8571085	8433082	71.5	2	HQ	PRJNA747871	SAMN24016465
GCF_036226465.1	Kitasatospora sp. NBC_01250	Kitasatospora	sp.	OK	Complete Genome	98.48	2.59	9001608	9001608	73	1	HQ	PRJNA747871	SAMN24016464
GCF_036226485.1	Kitasatospora herbaricolor	Kitasatospora	herbaricolor	OK	Complete Genome	97.57	3.31	9713312	9649141	73.5	2	HQ	PRJNA747871	SAMN24016462
GCF_036226505.1	Kitasatospora sp. NBC_01246	Kitasatospora	sp.	OK	Complete Genome	98.48	2.88	8933706	8763211	73.5	3	HQ	PRJNA747871	SAMN24016461
GCF_036226525.1	Kribbella sp. NBC_01245	Kribbella	sp.	OK	Complete Genome	98.88	2.52	8679014	8679014	67	1	HQ	PRJNA747871	SAMN24016460
GCF_036226545.1	Streptomyces canus	Streptomyces	canus	OK	Complete Genome	100	0.56	10812875	10812875	70.5	1	HQ	PRJNA747871	SAMN30553193
GCF_036226565.1	Kribbella sp. NBC_00709	Kribbella	sp.	OK	Complete Genome	97.48	4.62	8913447	8913447	68.5	1	HQ	PRJNA747871	SAMN30553192
GCF_036226605.1	Streptomyces sp. NBC_00704	Streptomyces	sp.	OK	Complete Genome	99.91	0.77	8225529	8037745	72.5	3	HQ	PRJNA747871	SAMN30553190
GCF_036226625.1	Streptomyces virginiae	Streptomyces	virginiae	Inconclusive	Complete Genome	99.6441	1.37547	8776050	8776050	71.6	1	HQ	PRJNA747871	SAMN24016272
GCF_036226645.1	Streptomyces sp. NBC_00696	Streptomyces	sp.	OK	Complete Genome	100	0.19	11090730	11090730	70.5	1	HQ	PRJNA747871	SAMN24016271
GCF_036226665.1	Streptomyces sp. NBC_00691	Streptomyces	sp.	OK	Complete Genome	99.91	0.99	8336306	8302280	72	2	HQ	PRJNA747871	SAMN24016270
GCF_036226685.1	Streptomyces sp. NBC_00690	Streptomyces	sp.	OK	Complete Genome	100	1.63	9169300	8833314	68.5	2	HQ	PRJNA747871	SAMN30553187
GCF_036226705.1	Streptomyces pseudovenezuelae	Streptomyces	pseudovenezuelae	OK	Complete Genome	99.91	1.01	10012265	10012265	71	1	HQ	PRJNA747871	SAMN30553185
GCF_036226745.1	Streptomyces sp. NBC_00683	Streptomyces	sp.	OK	Complete Genome	100	0.19	8519659	8519659	70.5	1	HQ	PRJNA747871	SAMN24016269
GCF_036226765.1	Streptomyces sp. NBC_00670	Streptomyces	sp.	OK	Complete Genome	99.94	0	7583196	7583196	72.5	1	HQ	PRJNA747871	SAMN30553179
GCF_036226805.1	Streptomyces melanogenes	Streptomyces	melanogenes	Inconclusive	Complete Genome	100	2.25386	8466399	8267928	71.5	3	HQ	PRJNA747871	SAMN24016268
GCF_036226825.1	Streptomyces sp. NBC_00667	Streptomyces	sp.	OK	Complete Genome	99.99	0.95	7574921	7132883	72	2	HQ	PRJNA747871	SAMN30553177
GCF_036226845.1	Streptomyces pseudovenezuelae	Streptomyces	pseudovenezuelae	OK	Complete Genome	99.91	0.79	10029205	10029205	71	1	HQ	PRJNA747871	SAMN30553176
GCF_036226885.1	Streptomyces sp. NBC_00663	Streptomyces	sp.	OK	Complete Genome	100	0.91	9992462	9859624	70.5	2	HQ	PRJNA747871	SAMN30553174
GCF_036226905.1	Streptomyces pseudovenezuelae	Streptomyces	pseudovenezuelae	OK	Complete Genome	99.91	1.1	10195533	10195533	71	1	HQ	PRJNA747871	SAMN30553172
GCF_036226925.1	Streptomyces sp. NBC_00659	Streptomyces	sp.	OK	Complete Genome	100	1.39	9661321	9661321	71	1	HQ	PRJNA747871	SAMN24016267
GCF_036226945.1	Streptomyces anthocyanicus	Streptomyces	anthocyanicus	OK	Complete Genome	99.87	0.19	8886815	8477056	72	2	HQ	PRJNA747871	SAMN30553413
GCF_036226965.1	Streptomyces althioticus	Streptomyces	althioticus	OK	Complete Genome	100	0.38	7929709	7636976	72	2	HQ	PRJNA747871	SAMN30553412
GCF_036226985.1	Streptomyces sp. NBC_01685	Streptomyces	sp.	OK	Complete Genome	99.85	0	7940178	7940178	71	1	HQ	PRJNA747871	SAMN30553411
GCF_036227005.1	Streptomyces microflavus	Streptomyces	microflavus	OK	Complete Genome	99.91	0.8	8296325	8296325	71.5	1	HQ	PRJNA747871	SAMN30553410
GCF_036227025.1	Streptomyces microflavus	Streptomyces	microflavus	OK	Complete Genome	99.91	0.49	8330854	8330854	71.5	1	HQ	PRJNA747871	SAMN30553409
GCF_036227125.1	Streptomyces sp. NBC_01485	Streptomyces	sp.	OK	Complete Genome	99.43	0.57	9167220	9142758	71	2	HQ	PRJNA747871	SAMN24016622
GCF_036227165.1	Streptomyces sp. NBC_01483	Streptomyces	sp.	OK	Complete Genome	100	2.87	12995681	11343589	69.5	3	HQ	PRJNA747871	SAMN24016620
GCF_036227185.1	Nocardia vinacea	Nocardia	vinacea	Inconclusive	Complete Genome	99.7494	4.01145	10557489	10557489	65.4	1	HQ	PRJNA747871	SAMN24016619
GCF_036227225.1	Streptomyces sp. NBC_01478	Streptomyces	sp.	OK	Complete Genome	99.81	1.07	12124816	12124816	70.5	1	HQ	PRJNA747871	SAMN24016617
GCF_036059255.1	Micromonospora sp. NBC_00617	Micromonospora	sp.	OK	Complete Genome	99.8246	2.36842	7207773	7207773	71.6	1	HQ	PRJNA747871	SAMN24016214
GCF_036227265.1	Streptomyces sp. NBC_01476	Streptomyces	sp.	OK	Complete Genome	98.67	2.21	8397038	8397038	71.5	1	HQ	PRJNA747871	SAMN24016616
GCF_036227285.1	Streptomyces canus	Streptomyces	canus	Inconclusive	Complete Genome	99.8927	0.214592	10907629	10864631	70.3	2	HQ	PRJNA747871	SAMN24016615
GCF_036227325.1	Streptomyces sp. NBC_01465	Streptomyces	sp.	OK	Complete Genome	99.87	0.68	9138776	9138776	70	1	HQ	PRJNA747871	SAMN24016610
GCF_036227365.1	Streptomyces sp. NBC_01462	Streptomyces	sp.	OK	Complete Genome	100	0.97	10933242	10423316	71	2	HQ	PRJNA747871	SAMN24016607
GCF_036227385.1	Micromonospora rifamycinica	Micromonospora	rifamycinica	OK	Complete Genome	94.94	4.08	6999233	6999233	73	1	HQ	PRJNA747871	SAMN24016606
GCF_036227405.1	Streptomyces sp. NBC_01460	Streptomyces	sp.	OK	Complete Genome	100	0.25	8801236	8666566	71	2	HQ	PRJNA747871	SAMN24016605
GCF_036227425.1	Streptomyces sp. NBC_01456	Streptomyces	sp.	OK	Complete Genome	100	1.92	9639990	9147089	71	5	HQ	PRJNA747871	SAMN30553299
GCF_036227445.1	Streptomyces sp. NBC_01455	Streptomyces	sp.	OK	Complete Genome	100	0.82	10853340	10187597	70.5	3	HQ	PRJNA747871	SAMN24016603
GCF_036227465.1	Streptomyces sp. NBC_01453	Streptomyces	sp.	OK	Complete Genome	99.18	1.94	9265359	9265359	70	1	HQ	PRJNA747871	SAMN24016602
GCF_036227485.1	Streptomyces sp. NBC_01451	Streptomyces	sp.	OK	Complete Genome	99.53	0.17	10266650	10266650	70.5	1	HQ	PRJNA747871	SAMN24016601
GCF_036227505.1	Streptomyces sp. NBC_01450	Streptomyces	sp.	OK	Complete Genome	100	1.99	13505152	10777081	70	3	HQ	PRJNA747871	SAMN24016600
GCF_036227585.1	Streptomyces niveus	Streptomyces	niveus	OK	Complete Genome	99.69	0.88	8548654	8500400	70.5	2	HQ	PRJNA747871	SAMN24016599
GCF_036227605.1	Streptomyces sp. NBC_01439	Streptomyces	sp.	OK	Complete Genome	99.87	1.18	9578283	9578283	71.5	1	HQ	PRJNA747871	SAMN24016595
GCF_036227625.1	Streptomyces anulatus	Streptomyces	anulatus	OK	Complete Genome	99.91	0.38	9054077	9054077	71.5	1	HQ	PRJNA747871	SAMN24016593
GCF_036228565.1	Streptomyces sp. NBC_01435	Streptomyces	sp.	OK	Complete Genome	100	0.95	9203650	8074063	71	3	HQ	PRJNA747871	SAMN24016591
GCF_036229765.1	Streptomyces niveus	Streptomyces	niveus	OK	Complete Genome	99.91	0.88	8756431	8756431	70.5	1	HQ	PRJNA747871	SAMN24016589
GCF_036231355.1	Streptomyces sp. NBC_01431	Streptomyces	sp.	OK	Complete Genome	99.91	0.73	8976559	8180708	70.5	3	HQ	PRJNA747871	SAMN24016588
GCF_036231945.1	Streptomyces sp. NBC_01429	Streptomyces	sp.	OK	Complete Genome	99.49	0.38	8078361	8078361	71.5	1	HQ	PRJNA747871	SAMN24016587
GCF_036231965.1	Streptomyces sp. NBC_01428	Streptomyces	sp.	OK	Complete Genome	99.53	0.76	9077533	9077533	71.5	1	HQ	PRJNA747871	SAMN24016586
GCF_036231985.1	Streptomyces sp. NBC_01426	Streptomyces	sp.	OK	Complete Genome	99.62	1.68	9564772	7659321	71.5	6	HQ	PRJNA747871	SAMN30553297
GCF_036232005.1	Streptomyces sp. NBC_01423	Streptomyces	sp.	OK	Complete Genome	100	1.04	7801618	7602278	71.5	2	HQ	PRJNA747871	SAMN24016584
GCF_036232025.1	Streptomyces sp. NBC_01422	Streptomyces	sp.	OK	Complete Genome	99.91	0	7998430	7750119	71	3	HQ	PRJNA747871	SAMN24016583
GCF_036232045.1	Streptomyces anulatus	Streptomyces	anulatus	OK	Complete Genome	99.91	0	9054251	9017348	71.5	2	HQ	PRJNA747871	SAMN24016582
GCF_036237135.1	Streptomyces canus	Streptomyces	canus	OK	Complete Genome	100	0.62	11497089	11497089	70	1	HQ	PRJNA747871	SAMN24016540
GCF_036237195.1	Streptomyces decoyicus	Streptomyces	decoyicus	OK	Complete Genome	99.94	0	9274166	9038935	71	2	HQ	PRJNA747871	SAMN24016539
GCF_036237215.1	Streptomyces sp. NBC_01358	Streptomyces	sp.	OK	Complete Genome	100	0	9442996	9442996	70.5	1	HQ	PRJNA747871	SAMN24016538
GCF_036237235.1	Streptomyces sp. NBC_01356	Streptomyces	sp.	OK	Complete Genome	99.91	0.76	10293779	10293779	70	1	HQ	PRJNA747871	SAMN24016537
GCF_036237255.1	Kitasatospora papulosa	Kitasatospora	papulosa	OK	Complete Genome	99.81	0.09	7734989	7734989	71	1	HQ	PRJNA747871	SAMN24016536
GCF_036237275.1	Streptomyces sp. NBC_01353	Streptomyces	sp.	OK	Complete Genome	99.62	1.23	8565674	8472668	71	2	HQ	PRJNA747871	SAMN24016535
GCF_036237295.1	Streptomyces sp. NBC_01352	Streptomyces	sp.	OK	Complete Genome	100	1.64	11315690	11274169	70.5	2	HQ	PRJNA747871	SAMN24016534
GCF_036237315.1	Streptomyces sp. NBC_01351	Streptomyces	sp.	OK	Complete Genome	99.62	1.33	8902773	8455151	71.5	3	HQ	PRJNA747871	SAMN24016533
GCF_036237335.1	Kitasatospora papulosa	Kitasatospora	papulosa	OK	Complete Genome	99.91	0.09	7680165	7680165	71	1	HQ	PRJNA747871	SAMN24016532
GCF_036237355.1	Streptomyces microflavus	Streptomyces	microflavus	OK	Complete Genome	99.53	0.3	8434431	8434431	71.5	1	HQ	PRJNA747871	SAMN24016531
GCF_036237375.1	Streptomyces sp. NBC_01280	Streptomyces	sp.	OK	Complete Genome	100	2.13	10211813	10211813	70.5	1	HQ	PRJNA747871	SAMN24016486
GCF_036237395.1	Streptomyces sp. NBC_01278	Streptomyces	sp.	OK	Complete Genome	99.57	1.69	9725030	8759357	71.5	3	HQ	PRJNA747871	SAMN24016485
GCF_036238395.1	Streptomyces albidoflavus	Streptomyces	albidoflavus	OK	Complete Genome	99.53	1.01	6978313	6978313	73.5	1	HQ	PRJNA747871	SAMN24016480
GCF_036239155.1	Streptomyces albidoflavus	Streptomyces	albidoflavus	OK	Complete Genome	99.43	1.01	7015337	7015337	73.5	1	HQ	PRJNA747871	SAMN24016479
GCF_036240075.1	Kitasatospora papulosa	Kitasatospora	papulosa	OK	Complete Genome	99.91	0.09	7532608	7413447	71	2	HQ	PRJNA747871	SAMN24016478
GCF_036240795.1	Streptomyces sp. NBC_01268	Streptomyces	sp.	OK	Complete Genome	100	1.42	8505003	8505003	72.5	1	HQ	PRJNA747871	SAMN24016477
GCF_036241575.1	Streptomyces sp. NBC_01267	Streptomyces	sp.	OK	Complete Genome	99.78	1	8069363	7861081	70	3	HQ	PRJNA747871	SAMN24016476
GCF_036242395.1	Kitasatospora sp. NBC_01266	Kitasatospora	sp.	OK	Complete Genome	99.07	3.03	8569703	8425813	72.5	2	HQ	PRJNA747871	SAMN24016475
GCF_036243495.1	Streptomyces luteogriseus	Streptomyces	luteogriseus	Inconclusive	Complete Genome	100	0.429185	9165939	9165939	71	1	HQ	PRJNA747871	SAMN24016273
GCF_036243895.1	Streptomyces sp. NBC_01725	Streptomyces	sp.	OK	Complete Genome	99.72	0.52	8050796	8026203	71	2	HQ	PRJNA747871	SAMN30553438
GCF_036244815.1	Streptomyces sp. NBC_01724	Streptomyces	sp.	OK	Complete Genome	99.62	0.38	10074909	9284291	69.5	2	HQ	PRJNA747871	SAMN30553437
GCF_036246005.1	Streptomyces sp. NBC_01723	Streptomyces	sp.	OK	Complete Genome	100	0.06	8850041	8762255	71.5	2	HQ	PRJNA747871	SAMN30553436
GCF_036247045.1	Streptomyces albidoflavus	Streptomyces	albidoflavus	OK	Complete Genome	99.34	1.01	7036030	7036030	73.5	1	HQ	PRJNA747871	SAMN30553435
GCF_036248255.1	Streptomyces sp. NBC_01717	Streptomyces	sp.	OK	Complete Genome	99.57	0.24	10196823	9334094	69.5	3	HQ	PRJNA747871	SAMN30553431
GCF_036248275.1	Streptomyces sp. NBC_01716	Streptomyces	sp.	OK	Complete Genome	99.91	2.02	8672617	8672617	70	1	HQ	PRJNA747871	SAMN30553430
GCF_036248295.1	Streptomyces sp. NBC_01715	Streptomyces	sp.	OK	Complete Genome	100	2.15	10093486	10093486	72	1	HQ	PRJNA747871	SAMN30553429
GCF_036248315.1	Streptomyces mirabilis	Streptomyces	mirabilis	OK	Complete Genome	99.91	2.49	12275813	12275813	70	1	HQ	PRJNA747871	SAMN30553428
GCF_036248545.1	Streptomyces sp. NBC_01708	Streptomyces	sp.	OK	Complete Genome	99.53	0.57	8081901	7765644	71	2	HQ	PRJNA747871	SAMN30553426
GCF_036250085.1	Streptomyces sp. NBC_01696	Streptomyces	sp.	OK	Complete Genome	99.91	0	7764320	7764320	71.5	1	HQ	PRJNA747871	SAMN30553419
GCF_036250635.1	Streptomyces sp. NBC_01693	Streptomyces	sp.	OK	Complete Genome	99.91	0.19	7896894	7896894	71.5	1	HQ	PRJNA747871	SAMN30553417
GCF_036250695.1	Streptomyces sp. NBC_01497	Streptomyces	sp.	OK	Complete Genome	99.26	0.57	9081801	8552978	71.5	2	HQ	PRJNA747871	SAMN24016627
GCF_036250715.1	Streptomyces brevispora	Streptomyces	brevispora	OK	Complete Genome	99.62	0	8676876	8676876	70.5	1	HQ	PRJNA747871	SAMN24016626
GCF_036250755.1	Streptomyces uncialis	Streptomyces	uncialis	Inconclusive	Complete Genome	99.8927	1.19814	9258615	9117749	72	3	HQ	PRJNA747871	SAMN24016544
GCF_036250835.1	Streptomyces sp. NBC_01362	Streptomyces	sp.	OK	Complete Genome	99.47	1.42	9970855	9346444	70.5	3	HQ	PRJNA747871	SAMN24016542
GCF_036250945.1	Streptomyces sp. NBC_01361	Streptomyces	sp.	OK	Complete Genome	99.91	2.04	11328791	10720672	70	3	HQ	PRJNA747871	SAMN24016541
GCF_036287475.1	Streptomyces iakyrus	Streptomyces	iakyrus	OK	Complete Genome	99.91	2.27	9116509	9116509	71	1	HQ	PRJNA1011464	SAMN37220207
GCF_045040125.1	Micromonospora sp. NBC_01392	Micromonospora	sp.	OK	Complete Genome	100	1.05263	7064414	7064414	73.2	1	HQ	PRJNA747871	SAMN24016564
GCF_036327775.1	Streptomyces sp. NBC_01498	Streptomyces	sp.	OK	Complete Genome	99.53	1.89	7267618	7267618	71.5	1	HQ	PRJNA747871	SAMN30553304
GCF_036345035.1	Streptomyces pseudovenezuelae	Streptomyces	pseudovenezuelae	OK	Complete Genome	99.91	0.51	10170903	10077198	71	2	HQ	PRJNA747871	SAMN30553150
GCF_036345055.1	Streptomyces chartreusis	Streptomyces	chartreusis	OK	Complete Genome	99.95	1.17	10297333	10126779	71	2	HQ	PRJNA747871	SAMN30553147
GCF_036345075.1	Streptomyces sp. NBC_00589	Streptomyces	sp.	OK	Complete Genome	100	0.94	11075804	11075804	70	1	HQ	PRJNA747871	SAMN30553146
GCF_036345095.1	Streptomyces sp. NBC_00588	Streptomyces	sp.	OK	Complete Genome	99.62	1.52	9409010	9409010	70.5	1	HQ	PRJNA747871	SAMN30553145
GCF_036345135.1	Streptomyces griseorubiginosus	Streptomyces	griseorubiginosus	Inconclusive	Complete Genome	99.8927	0.643777	9802609	9643430	71	4	HQ	PRJNA747871	SAMN30553143
GCF_036345155.1	Streptomyces sp. NBC_00582	Streptomyces	sp.	OK	Complete Genome	99.57	0.14	11145185	10791786	71.5	2	HQ	PRJNA747871	SAMN30553142
GCF_036345175.1	Streptomyces sp. NBC_00576	Streptomyces	sp.	OK	Complete Genome	99.62	1.89	10972925	10919009	69.5	2	HQ	PRJNA747871	SAMN24016253
GCF_036345215.1	Streptomyces platensis	Streptomyces	platensis	OK	Complete Genome	99.84	0.99	8806723	8806723	71	1	HQ	PRJNA747871	SAMN24016252
GCF_036345235.1	Streptomyces sp. NBC_00566	Streptomyces	sp.	OK	Complete Genome	99.75	0.95	6411420	6411420	72	1	HQ	PRJNA747871	SAMN30553137
GCF_036345255.1	Streptomyces sp. NBC_00569	Streptomyces	sp.	OK	Complete Genome	100	2.32	10324489	10324489	70.5	1	HQ	PRJNA747871	SAMN30553139
GCF_045040155.1	Micromonospora sp. NBC_01405	Micromonospora	sp.	OK	Contig	98.9474	0.789474	7286859	7269126	72.7	2	HQ	PRJNA747871	SAMN24016570
GCF_036345955.1	Streptomyces sp. NBC_00562	Streptomyces	sp.	OK	Complete Genome	100	0.88	9910889	9892438	69.5	2	HQ	PRJNA747871	SAMN30553135
GCF_036345975.1	Streptomyces clavifer	Streptomyces	clavifer	OK	Complete Genome	99.91	0.38	8241378	7749650	71	3	HQ	PRJNA747871	SAMN30553134
GCF_036345995.1	Streptomyces sp. NBC_00557	Streptomyces	sp.	OK	Complete Genome	99.62	2.21	9019680	8676941	72	2	HQ	PRJNA747871	SAMN30553133
GCF_036346085.1	Streptomyces longwoodensis	Streptomyces	longwoodensis	Inconclusive	Complete Genome	100	1.71674	8574628	8574628	72.8	1	HQ	PRJNA747871	SAMN30553127
GCF_036346105.1	Streptomyces sp. NBC_00539	Streptomyces	sp.	OK	Complete Genome	99.99	0.95	7505305	7068336	72	2	HQ	PRJNA747871	SAMN30553126
GCF_036346295.1	Streptomyces sp. NBC_00536	Streptomyces	sp.	OK	Complete Genome	98.77	0.82	9153806	8664208	72	4	HQ	PRJNA747871	SAMN30553125
GCF_036346555.1	Streptomyces anulatus	Streptomyces	anulatus	OK	Complete Genome	99.91	0.27	8880487	8576883	71.5	2	HQ	PRJNA747871	SAMN30553124
GCF_036346595.1	Streptomyces sp. NBC_00525	Streptomyces	sp.	OK	Complete Genome	99.91	0.66	7102204	6805448	72	2	HQ	PRJNA747871	SAMN24016243
GCF_036346615.1	Streptomyces sp. NBC_00523	Streptomyces	sp.	OK	Complete Genome	100	0.76	7531209	7239234	72	2	HQ	PRJNA747871	SAMN30553117
GCF_036346815.1	Streptomyces murinus	Streptomyces	murinus	OK	Complete Genome	99.91	1.36	8509353	8509353	72	1	HQ	PRJNA747871	SAMN24016242
GCF_036346875.1	Nocardia sp. NBC_00508	Nocardia	sp.	OK	Complete Genome	98.81	3.66	7722612	7722612	67.5	1	HQ	PRJNA747871	SAMN30553109
GCF_036346895.1	Streptomyces sp. NBC_00503	Streptomyces	sp.	OK	Complete Genome	100	1.76	8602329	8192422	71.5	2	HQ	PRJNA747871	SAMN24016239
GCF_036346915.1	Streptomyces anulatus	Streptomyces	anulatus	OK	Complete Genome	99.91	0.19	8782423	8782423	71.5	1	HQ	PRJNA747871	SAMN24016238
GCF_036346935.1	Streptomyces sp. NBC_00869	Streptomyces	sp.	OK	Complete Genome	99.62	1.23	7775113	7568462	72	2	HQ	PRJNA747871	SAMN24016295
GCF_036346995.1	Streptomyces sp. NBC_00825	Streptomyces	sp.	OK	Complete Genome	99.91	1.42	10229135	9682462	70.5	2	HQ	PRJNA747871	SAMN30553253
GCF_036347035.1	Micromonospora sp. NBC_00821	Micromonospora	sp.	OK	Complete Genome	98.06	2.8	7275213	7198112	71	2	HQ	PRJNA747871	SAMN30553251
GCF_036347055.1	Streptomyces sp. NBC_00820	Streptomyces	sp.	OK	Complete Genome	99.81	1.34	8106388	8106388	71.5	1	HQ	PRJNA747871	SAMN30553250
GCF_036347075.1	Micromonospora zamorensis	Micromonospora	zamorensis	OK	Complete Genome	98.28	3.45	7086483	7086483	71	1	HQ	PRJNA747871	SAMN30553243
GCF_036347095.1	Streptomyces jietaisiensis	Streptomyces	jietaisiensis	OK	Complete Genome	99.94	0	7415499	7415499	73	1	HQ	PRJNA747871	SAMN30553242
GCF_036347155.1	Streptomyces longwoodensis	Streptomyces	longwoodensis	Inconclusive	Complete Genome	100	0.858369	8145377	8073982	73.1	3	HQ	PRJNA747871	SAMN24016280
GCF_036347175.1	Streptomyces platensis	Streptomyces	platensis	OK	Complete Genome	99.84	0.33	8963402	8870427	71	2	HQ	PRJNA747871	SAMN24016279
GCF_036347195.1	Streptomyces sp. NBC_00724	Streptomyces	sp.	OK	Complete Genome	100	0.19	9524224	9307314	69.5	2	HQ	PRJNA747871	SAMN30553198
GCF_036485475.1	Streptomyces sp. SS162	Streptomyces	sp.	OK	Complete Genome	99.72	1.34	6778597	6778597	74.5	1	HQ	PRJNA1053419	SAMN38859063
GCF_036541015.1	Streptomyces xanthochromogenes	Streptomyces	xanthochromogenes	OK	Complete Genome	94.11	0.16	7726624	7726624	71.5	1	HQ	PRJNA1044569	SAMN39615942
GCF_036541045.1	Streptomyces prasinus	Streptomyces	prasinus	OK	Complete Genome	96.45	0.51	7581398	7581398	72	1	HQ	PRJNA1044569	SAMN39616150
GCF_036607905.1	Streptomyces sp. SCSIO 75703	Streptomyces	sp.	OK	Complete Genome	99.47	1.57	6885934	6885934	73.5	1	HQ	PRJNA1061458	SAMN39269796
GCF_036669995.1	Rhodococcus sp. DN22	Rhodococcus	sp.	OK	Complete Genome	99.59	1.18	7435512	6509401	62.5	7	HQ	PRJNA1005489	SAMN36988074
GCF_036826855.1	Streptomyces sp. SJL17-4	Streptomyces	sp.	OK	Complete Genome	98.77	0.66	8543434	8543434	71.5	1	HQ	PRJNA859142	SAMN29767937
GCF_036870975.1	Streptomyces virginiae	Streptomyces	virginiae	OK	Complete Genome	100	0.95	8341079	8341079	72.5	1	HQ	PRJNA1077906	SAMN39984692
GCF_036873195.1	Streptomyces sp. B21-104	Streptomyces	sp.	OK	Complete Genome	97.96	0.66	7915048	7915048	71	1	HQ	PRJNA951682	SAMN34051469
GCF_036873425.1	Streptomyces acidiscabies	Streptomyces	acidiscabies	OK	Complete Genome	98.39	0.69	9795961	9795961	70.5	1	HQ	PRJNA951682	SAMN34051468
GCF_036873705.1	Streptomyces acidiscabies	Streptomyces	acidiscabies	OK	Complete Genome	98.58	0.88	11194725	11096455	70.5	3	HQ	PRJNA951682	SAMN34051467
GCF_036906735.1	Micromonospora profundi	Micromonospora	profundi	OK	Contig	96.79	4.56	6648623	493503	71	42	MQ	PRJNA1078576	SAMN40007021
GCF_036964505.1	Rhodococcus erythropolis	Rhodococcus	erythropolis	OK	Scaffold	94.03	2.23	6313570	298651	62.5	42	MQ	PRJNA1005824	SAMN39466408
GCF_036967205.1	Streptomyces sp. Q6	Streptomyces	sp.	OK	Complete Genome	97.7	1.52	8951745	8566166	71.5	2	HQ	PRJNA1071325	SAMN39684076
GCF_037023745.1	Streptomyces sp. SCSIO 30461	Streptomyces	sp.	OK	Complete Genome	99.4	0.82	8047498	8047498	69.5	1	HQ	PRJNA1069361	SAMN39616472
GCF_037023755.1	Saccharopolyspora sp. SCSIO 74807	Saccharopolyspora	sp.	OK	Complete Genome	99.32	0.91	6688468	6688468	70	1	HQ	PRJNA1069355	SAMN39616408
GCF_037055355.1	Streptomyces sp. DG1A-41	Streptomyces	sp.	OK	Complete Genome	94.97	0.51	8991014	8991014	71	1	HQ	PRJNA978978	SAMN40024825
GCF_037099765.1	Streptomyces griseoaurantiacus	Streptomyces	griseoaurantiacus	OK	Complete Genome	99.94	0	7638908	7487263	72.5	4	HQ	PRJNA1083031	SAMN40229668
GCF_037126205.1	Streptomyces hygroscopicus subsp. hygroscopicus	Streptomyces	hygroscopicus	OK	Complete Genome	99.72	2.02	9682870	9682870	72	1	HQ	PRJNA1081495	SAMN40178999
GCF_037201975.1	Streptomyces sp. TG1A-60	Streptomyces	sp.	OK	Complete Genome	95.32	1.52	7826501	7826501	71	1	HQ	PRJNA1084923	SAMN40289584
GCF_037203805.1	Kribbella sp. CCNWLW201	Kribbella	sp.	OK	Scaffold	98.18	4.62	8889474	469934	68	34	MQ	PRJNA1083075	SAMN40232157
GCF_037413555.1	Streptomyces nigra	Streptomyces	nigra	OK	Complete Genome	100	0.32	7691053	7668262	72	2	HQ	PRJNA1083423	SAMN40246711
GCF_037414505.1	Streptomyces netropsis	Streptomyces	netropsis	OK	Complete Genome	99.91	0.99	8144008	8144008	71.5	1	HQ	PRJNA1087181	SAMN40435612
GCF_037463925.1	Rhodococcus qingshengii	Rhodococcus	qingshengii	OK	Complete Genome	99.14	0	6334786	6189868	62.5	2	HQ	PRJNA1086709	SAMN40410320
GCF_037727765.1	Pseudonocardia sp. DW16-2	Pseudonocardia	sp.	OK	Contig	92.7	3.32	5256048	225179	75	42	MQ	PRJNA1088928	SAMN40506486
GCF_037940185.1	Streptomyces sp. F41	Streptomyces	sp.	OK	Complete Genome	99.91	1.75	8343496	8310873	72	2	HQ	PRJNA1089331	SAMN40537137
GCF_037940415.1	Streptomyces sp. f51	Streptomyces	sp.	OK	Complete Genome	99.95	0.85	8153305	8092598	71	2	HQ	PRJNA1089810	SAMN40560783
GCF_037993025.1	Streptomyces sp. SS7	Streptomyces	sp.	OK	Complete Genome	98.56	2.08	9799701	9799701	71.5	1	HQ	PRJNA1053487	SAMN38859994
GCF_038039445.1	Pseudonocardia carboxydivorans	Pseudonocardia	carboxydivorans	OK	Contig	93.76	3.71	5848028	324731	74.5	42	MQ	PRJNA1088928	SAMN40506563
GCF_038096185.1	Rhodococcus qingshengii	Rhodococcus	qingshengii	OK	Chromosome	99.52	0.54	6460934	3756282	62.5	3	HQ	PRJNA1097065	SAMN40861310
GCF_038242915.1	Streptomyces albidoflavus	Streptomyces	albidoflavus	OK	Complete Genome	99.43	0.57	7122485	7031575	73.5	2	HQ	PRJNA994269	SAMN36419051
GCF_038244785.1	Nocardia farcinica	Nocardia	farcinica	OK	Complete Genome	99.87	2.69	6313751	6133643	70.5	3	HQ	PRJNA1010677	SAMN37194361
GCF_038246755.1	Micromonospora sp. FIMYZ51	Micromonospora	sp.	OK	Complete Genome	91.03	4.47	7046848	7046848	71	1	HQ	PRJNA979260	SAMN35573013
GCF_038447005.1	Rhodococcus sp. DK180	Rhodococcus	sp.	OK	Complete Genome	99.59	2.01	9520075	7902321	67	6	HQ	PRJNA514400	SAMN33169485
GCF_038447315.1	Rhodococcus sp. DK176	Rhodococcus	sp.	OK	Complete Genome	99.59	1.52	8825896	7902427	67	5	HQ	PRJNA514400	SAMN33169484
GCF_038662715.1	Streptomyces albidoflavus	Streptomyces	albidoflavus	OK	Complete Genome	99.05	0.82	7102577	7102577	73.5	1	HQ	PRJNA1102542	SAMN41028160
GCF_038853135.1	Rhodococcus ruber	Rhodococcus	ruber	OK	Complete Genome	99.44	0.82	6296733	5454743	70	5	HQ	PRJNA944780	SAMN33761289
GCF_039529595.1	Kribbella lupini	Kribbella	lupini	OK	Scaffold	98.15	2.94	8402267	650133	70	22	MQ	PRJDB10510	SAMD00645210
GCF_039529615.1	Kribbella karoonensis	Kribbella	karoonensis	OK	Scaffold	97.24	3.78	8367196	364381	69.5	50	MQ	PRJDB10510	SAMD00645211
GCF_039529635.1	Kribbella alba	Kribbella	alba	OK	Scaffold	99.16	2.52	6945963	281222	68	33	MQ	PRJDB10510	SAMD00645212
GCF_039531955.1	Saccharopolyspora halophila	Saccharopolyspora	halophila	OK	Contig	100	1.99	5509554	450323	70	40	MQ	PRJDB10510	SAMD00645312
GCF_039542665.1	Saccharopolyspora cebuensis	Saccharopolyspora	cebuensis	OK	Scaffold	99.5	1.66	6241395	371793	73	49	MQ	PRJDB10510	SAMD00645784
GCF_039542905.1	Kitasatospora terrestris	Kitasatospora	terrestris	OK	Contig	97.62	2.33	8573799	8570212	73.5	2	MQ	PRJDB10510	SAMD00645795
GCF_039565925.1	Rhodococcus aetherivorans	Rhodococcus	aetherivorans	OK	Complete Genome	99.52	0.7	6199109	6052719	70.5	2	HQ	PRJNA1106757	SAMN41147323
GCF_039566955.1	Micromonospora sp. DSM 45708	Micromonospora	sp.	OK	Chromosome	97.39	3.2	7016407	7016307	73	1	HQ	PRJNA1060621	SAMN39240473
GCF_039566965.1	Micromonospora sp. DSM 102119	Micromonospora	sp.	OK	Chromosome	96.61	4.56	7543897	7543797	74	1	HQ	PRJNA1060629	SAMN39240700
GCF_039636755.1	Streptomyces sp. DSS69	Streptomyces	sp.	OK	Complete Genome	99.91	0.38	7704811	7704811	71.5	1	HQ	PRJNA1063167	SAMN39327920
GCF_039679095.1	Micromonospora sp. DPT	Micromonospora	sp.	OK	Complete Genome	95.72	4.4	7033870	7033870	73	1	HQ	PRJNA1105762	SAMN41109631
GCF_040114435.1	Streptomyces rapamycinicus	Streptomyces	rapamycinicus	OK	Complete Genome	95.64	2.08	12703671	10146977	71	6	HQ	PRJNA1118102	SAMN41599869
GCF_040215685.1	Micromonospora sp. HUAS YX12	Micromonospora	sp.	OK	Complete Genome	98.26	1.63	6504622	6504622	73	1	HQ	PRJNA1115797	SAMN41513831
GCF_040254265.1	Kribbella sp. HUAS MG21	Kribbella	sp.	OK	Complete Genome	97.41	2.94	8456892	8456892	70	1	HQ	PRJNA1121026	SAMN41724686
GCF_040256695.1	Rhodococcus sp. D-6	Rhodococcus	sp.	OK	Complete Genome	99.41	1.03	5365538	5308891	68	3	HQ	PRJNA1005909	SAMN37000890
GCF_040296245.1	Pseudonocardia alni	Pseudonocardia	alni	OK	Scaffold	93.3	2.78	6079912	314220	74.5	42	MQ	PRJNA1106891	SAMN41495566
GCF_040299445.1	Micromonospora chalcea	Micromonospora	chalcea	OK	Contig	97.84	3.69	6950781	555726	73	37	MQ	PRJNA1106891	SAMN41495121
GCF_040300265.1	Kribbella sp. NPDC000426	Kribbella	sp.	OK	Scaffold	97.31	4.62	9201418	701250	68.5	22	MQ	PRJNA1106891	SAMN41495213
GCF_040302185.1	Micromonospora sp. NPDC127501	Micromonospora	sp.	OK	Scaffold	98.4	3.98	7003992	518204	71	36	MQ	PRJNA1106891	SAMN41496455
GCF_040429615.1	Micromonospora harpali	Micromonospora	harpali	OK	Chromosome	96.32	4.59	7369069	7368969	74	1	HQ	PRJNA1060849	SAMN39245861
GCF_040529335.1	Streptomyces sp. HUAS MG91	Streptomyces	sp.	OK	Complete Genome	99.91	0.76	8616192	8451342	71.5	2	HQ	PRJNA1115799	SAMN41513879
GCF_040546695.1	Rhodococcus sp. OAS809	Rhodococcus	sp.	OK	Contig	97.67	1.28	7264686	6319994	62.5	4	MQ	PRJNA1115675	SAMN41513449
GCF_040548995.1	Rhodococcus sp. PvR044	Rhodococcus	sp.	OK	Contig	98.28	2.95	5762299	409006	69	28	MQ	PRJNA1115491	SAMN41528272
GCF_040571325.1	Kitasatospora sp. HUAS MG31	Kitasatospora	sp.	OK	Complete Genome	98.11	4.4	8019228	7824202	73.5	2	HQ	PRJNA1129193	SAMN42147880
GCF_040571425.1	Streptomyces sp. JL1001	Streptomyces	sp.	OK	Complete Genome	99.91	0.09	7943495	7943495	71.5	1	HQ	PRJNA1021392	SAMN37555396
GCF_040605415.1	Kribbella sp. NPDC005582	Kribbella	sp.	OK	Scaffold	98.25	4.62	8174246	954010	68	19	MQ	PRJNA1106891	SAMN41498723
GCF_040607295.1	Micromonospora taraxaci	Micromonospora	taraxaci	OK	Scaffold	98.25	4.17	7249487	395103	71	39	MQ	PRJNA1106891	SAMN41496467
GCF_040607735.1	Micromonospora zamorensis	Micromonospora	zamorensis	OK	Scaffold	97.84	2.81	6828956	356998	71.5	35	MQ	PRJNA1106891	SAMN41499187
GCF_040607775.1	Micromonospora sp. NPDC005237	Micromonospora	sp.	OK	Scaffold	98.1	2.17	6668070	398177	72	43	MQ	PRJNA1106891	SAMN41496938
GCF_040609595.1	Nocardia sp. NPDC004654	Nocardia	sp.	OK	Scaffold	99.27	4.96	7690715	494614	68.5	34	MQ	PRJNA1106891	SAMN41496259
GCF_040610805.1	Kribbella sp. NPDC003557	Kribbella	sp.	OK	Scaffold	97.91	2.52	8700934	360725	69.5	43	MQ	PRJNA1106891	SAMN41495619
GCF_040610875.1	Kribbella sp. NPDC003505	Kribbella	sp.	OK	Scaffold	98.25	3.36	8704620	444933	69.5	40	MQ	PRJNA1106891	SAMN41495618
GCF_040611495.1	Nocardia sp. NPDC006630	Nocardia	sp.	OK	Scaffold	98.09	4.58	8779140	665800	66.5	32	MQ	PRJNA1106891	SAMN41499211
GCF_040630175.1	Nocardia sp. NPDC005825	Nocardia	sp.	OK	Contig	97.48	3.61	7929926	458350	68.5	36	MQ	PRJNA1106891	SAMN41497568
GCF_040631145.1	Micromonospora zamorensis	Micromonospora	zamorensis	OK	Scaffold	98.35	3.56	6942853	239459	71.5	48	MQ	PRJNA1106891	SAMN41498984
GCF_040631175.1	Micromonospora zamorensis	Micromonospora	zamorensis	OK	Scaffold	98.35	3.56	7045629	394720	71	38	MQ	PRJNA1106891	SAMN41498979
GCF_040631645.1	Micromonospora sediminicola	Micromonospora	sediminicola	OK	Scaffold	98.49	1.39	6326494	298597	74	48	MQ	PRJNA1106891	SAMN41496093
GCF_040632275.1	Nocardia beijingensis	Nocardia	beijingensis	OK	Scaffold	98.83	2.31	7393041	468018	69	31	MQ	PRJNA1106891	SAMN41498039
GCF_040632335.1	Nocardia sp. NPDC019395	Nocardia	sp.	OK	Scaffold	97.38	2.08	7151633	457128	67	49	MQ	PRJNA1106891	SAMN41496074
GCF_040632515.1	Micromonospora sediminicola	Micromonospora	sediminicola	OK	Scaffold	98.34	2.19	6820554	236316	73.5	48	MQ	PRJNA1106891	SAMN41496280
GCF_040632645.1	Nocardia sp. NPDC019219	Nocardia	sp.	OK	Scaffold	98.91	2.37	7503573	270506	69	48	MQ	PRJNA1106891	SAMN41495869
GCF_040635065.1	Nocardia asteroides	Nocardia	asteroides	OK	Scaffold	97.99	3.19	7162961	352659	70	36	MQ	PRJNA1106891	SAMN41499221
GCF_040638345.1	Kribbella sp. NPDC026611	Kribbella	sp.	OK	Scaffold	98.18	3.78	8436169	492111	68.5	37	MQ	PRJNA1106891	SAMN41496547
GCF_040638675.1	Nocardia asteroides	Nocardia	asteroides	OK	Scaffold	98.13	3.06	6709080	329573	70	38	MQ	PRJNA1106891	SAMN41498399
GCF_040639005.1	Nocardia sp. NPDC023988	Nocardia	sp.	OK	Scaffold	97.72	3.02	6417161	372978	68	31	MQ	PRJNA1106891	SAMN41497402
GCF_040639075.1	Kribbella sp. NPDC023972	Kribbella	sp.	OK	Scaffold	99.09	3.36	7933162	508220	68.5	43	MQ	PRJNA1106891	SAMN41496314
GCF_040639145.1	Micromonospora ureilytica	Micromonospora	ureilytica	OK	Scaffold	97.36	2.93	7282624	521210	71	25	MQ	PRJNA1106891	SAMN41496753
GCF_040639205.1	Micromonospora chalcea	Micromonospora	chalcea	OK	Scaffold	98.58	3.61	6561254	423761	73	31	MQ	PRJNA1106891	SAMN41495354
GCF_040639395.1	Nocardia fluminea	Nocardia	fluminea	OK	Scaffold	98.57	3.06	7056310	406197	67.5	34	MQ	PRJNA1106891	SAMN41497835
GCF_040639475.1	Kribbella sp. NPDC023855	Kribbella	sp.	OK	Scaffold	99.16	4.62	8425945	431898	68	39	MQ	PRJNA1106891	SAMN41496111
GCF_040639755.1	Nocardia fluminea	Nocardia	fluminea	OK	Scaffold	98.91	4.39	7069473	329389	67.5	36	MQ	PRJNA1106891	SAMN41496108
GCF_040640015.1	Nocardia fluminea	Nocardia	fluminea	OK	Scaffold	98.84	2.92	7081986	509761	68	34	MQ	PRJNA1106891	SAMN41496959
GCF_040642575.1	Micromonospora purpureochromogenes	Micromonospora	purpureochromogenes	OK	Scaffold	96.3	4.52	6405275	416681	73	33	MQ	PRJNA1106891	SAMN41497202
GCF_040642635.1	Micromonospora sp. NPDC047793	Micromonospora	sp.	OK	Scaffold	94.93	4.23	7336577	342608	71.5	47	MQ	PRJNA1106891	SAMN41495406
GCF_040642815.1	Nocardia sp. NPDC047648	Nocardia	sp.	OK	Scaffold	99.18	2.96	7751443	314168	68.5	49	MQ	PRJNA1106891	SAMN41497860
GCF_040643015.1	Micromonospora sp. NPDC047527	Micromonospora	sp.	OK	Scaffold	96.77	3.47	6779754	500778	71.5	34	MQ	PRJNA1106891	SAMN41497002
GCF_040643435.1	Rhodococcus sp. NPDC047139	Rhodococcus	sp.	OK	Scaffold	98.2	0.92	4825340	292360	67	50	MQ	PRJNA1106891	SAMN41496998
GCF_040646855.1	Micromonospora tulbaghiae	Micromonospora	tulbaghiae	OK	Scaffold	98.6	2.35	7195372	395698	72.5	44	MQ	PRJNA1106891	SAMN41496980
GCF_040648195.1	Micromonospora tulbaghiae	Micromonospora	tulbaghiae	OK	Scaffold	99.06	1.71	6442528	601830	73	21	MQ	PRJNA1106891	SAMN41495736
GCF_040648215.1	Micromonospora taraxaci	Micromonospora	taraxaci	OK	Scaffold	97.37	3.02	7278541	340112	71	42	MQ	PRJNA1106891	SAMN41497214
GCF_040648595.1	Micromonospora sp. NPDC049107	Micromonospora	sp.	OK	Scaffold	96.92	3.1	7048110	360773	71.5	40	MQ	PRJNA1106891	SAMN41495422
GCF_040648635.1	Micromonospora sp. NPDC049114	Micromonospora	sp.	OK	Scaffold	98.35	1.94	7085720	385387	72	50	MQ	PRJNA1106891	SAMN41497648
GCF_040648955.1	Micromonospora chalcea	Micromonospora	chalcea	OK	Scaffold	98.3	3.61	6770906	651588	73	34	MQ	PRJNA1106891	SAMN41496371
GCF_040649335.1	Micromonospora sp. NPDC048986	Micromonospora	sp.	OK	Scaffold	98.08	2.98	7113645	354387	71	42	MQ	PRJNA1106891	SAMN41497891
GCF_040649635.1	Micromonospora sp. NPDC048909	Micromonospora	sp.	OK	Scaffold	96.31	3.43	6927641	509440	72.5	34	MQ	PRJNA1106891	SAMN41497890
GCF_040649655.1	Micromonospora sp. NPDC048905	Micromonospora	sp.	OK	Scaffold	98.12	4.06	7278147	330154	71.5	41	MQ	PRJNA1106891	SAMN41497644
GCF_040649715.1	Micromonospora sp. NPDC048887	Micromonospora	sp.	OK	Scaffold	98.48	2.18	6183330	252501	73	50	MQ	PRJNA1106891	SAMN41497846
GCF_040649815.1	Micromonospora tulbaghiae	Micromonospora	tulbaghiae	OK	Scaffold	99.06	2.2	6669462	377860	73	44	MQ	PRJNA1106891	SAMN41495415
GCF_040649855.1	Micromonospora tulbaghiae	Micromonospora	tulbaghiae	OK	Scaffold	99.2	1.71	6578674	295498	73	48	MQ	PRJNA1106891	SAMN41495414
GCF_040653255.1	Pseudonocardia alni	Pseudonocardia	alni	OK	Scaffold	93.82	4.55	6355682	705361	74.5	30	MQ	PRJNA1106891	SAMN41495940
GCF_040654235.1	Nocardia sp. NPDC050718	Nocardia	sp.	OK	Scaffold	98.05	3.32	7184665	469613	70	31	MQ	PRJNA1106891	SAMN41498148
GCF_040654275.1	Nocardia sp. NPDC050717	Nocardia	sp.	OK	Scaffold	98.1	2.91	6875635	308038	70	45	MQ	PRJNA1106891	SAMN41499281
GCF_040654395.1	Nocardia sp. NPDC050697	Nocardia	sp.	OK	Scaffold	97.5	2.27	7105724	494948	72	33	MQ	PRJNA1106891	SAMN41497028
GCF_040655095.1	Nocardia salmonicida	Nocardia	salmonicida	OK	Scaffold	98.76	3.53	7213107	421849	67.5	37	MQ	PRJNA1106891	SAMN41496593
GCF_040655195.1	Nocardia tengchongensis	Nocardia	tengchongensis	OK	Scaffold	98.13	3.9	7722506	564249	68.5	49	MQ	PRJNA1106891	SAMN41496591
GCF_040655315.1	Kribbella sp. NPDC050459	Kribbella	sp.	OK	Scaffold	98.25	3.36	8810105	404712	69.5	32	MQ	PRJNA1106891	SAMN41498144
GCF_040655375.1	Nocardia salmonicida	Nocardia	salmonicida	OK	Scaffold	98.76	3.23	7665182	406182	67	47	MQ	PRJNA1106891	SAMN41498143
GCF_040655475.1	Nocardia sp. NPDC050413	Nocardia	sp.	OK	Scaffold	97.82	3.04	6237037	505244	68	36	MQ	PRJNA1106891	SAMN41498142
GCF_040655675.1	Nocardia sp. NPDC050378	Nocardia	sp.	OK	Scaffold	98.19	3.86	6924576	439071	68	49	MQ	PRJNA1106891	SAMN41497473
GCF_040655975.1	Nocardia fluminea	Nocardia	fluminea	OK	Scaffold	98.86	3.76	7257909	419670	67.5	43	MQ	PRJNA1106891	SAMN41497918
GCF_040655995.1	Rhodococcus coprophilus	Rhodococcus	coprophilus	OK	Scaffold	97.03	1.16	4501029	542648	67	26	MQ	PRJNA1106891	SAMN41497471
GCF_040656415.1	Rhodococcus sp. NPDC049939	Rhodococcus	sp.	OK	Scaffold	96.16	2.21	4475670	418278	63.5	28	MQ	PRJNA1106891	SAMN41497668
GCF_040656755.1	Micromonospora chalcea	Micromonospora	chalcea	OK	Scaffold	98.54	3.66	6623575	356528	73	42	MQ	PRJNA1106891	SAMN41495461
GCF_040675025.1	Nocardia salmonicida	Nocardia	salmonicida	OK	Scaffold	98.49	3.49	7228357	887888	67.5	23	MQ	PRJNA1106891	SAMN41495447
GCF_040675555.1	Kribbella sp. NPDC049584	Kribbella	sp.	OK	Scaffold	98.25	4.62	8217202	403955	68	35	MQ	PRJNA1106891	SAMN41496383
GCF_040676835.1	Micromonospora tulbaghiae	Micromonospora	tulbaghiae	OK	Scaffold	98.77	1.57	6487698	301357	73	39	MQ	PRJNA1106891	SAMN41497656
GCF_040676935.1	Saccharopolyspora sp. NPDC049426	Saccharopolyspora	sp.	OK	Scaffold	99.5	1.49	7101146	355825	69.5	40	MQ	PRJNA1106891	SAMN41497908
GCF_040677215.1	Micromonospora noduli	Micromonospora	noduli	OK	Scaffold	98.69	3.43	7189663	488626	71	32	MQ	PRJNA1106891	SAMN41496379
GCF_040677775.1	Micromonospora sp. NPDC053740	Micromonospora	sp.	OK	Scaffold	98.25	4.37	7364734	380912	71	36	MQ	PRJNA1106891	SAMN41497052
GCF_040678715.1	Micromonospora sp. NPDC049301	Micromonospora	sp.	OK	Scaffold	96.47	4.77	6604538	354558	72.5	39	MQ	PRJNA1106891	SAMN41498045
GCF_040678935.1	Rhodococcus coprophilus	Rhodococcus	coprophilus	OK	Scaffold	97.03	0.99	4501309	511014	67	26	MQ	PRJNA1106891	SAMN41497459
GCF_040679495.1	Nocardia sp. NPDC052254	Nocardia	sp.	OK	Scaffold	98.37	1.37	7507727	348372	67.5	46	MQ	PRJNA1106891	SAMN41497956
GCF_040680615.1	Nocardia sp. NPDC052001	Nocardia	sp.	OK	Scaffold	96.58	4.26	9359539	924547	66.5	42	MQ	PRJNA1106891	SAMN41496411
GCF_040680955.1	Kribbella sp. NPDC051936	Kribbella	sp.	OK	Scaffold	97.41	3.36	8466684	685561	69.5	26	MQ	PRJNA1106891	SAMN41496607
GCF_040681225.1	Nocardia sp. NPDC051833	Nocardia	sp.	OK	Scaffold	98.1	4.27	7487404	744271	70	20	MQ	PRJNA1106891	SAMN41497947
GCF_040681285.1	Nocardia sp. NPDC051832	Nocardia	sp.	OK	Scaffold	98.43	4.17	8349857	1680903	68	19	MQ	PRJNA1106891	SAMN41497946
GCF_040681455.1	Kribbella sp. NPDC051770	Kribbella	sp.	OK	Scaffold	97.31	3.36	8278069	459233	70	39	MQ	PRJNA1106891	SAMN41497490
GCF_040681515.1	Kribbella sp. NPDC051718	Kribbella	sp.	OK	Scaffold	97.24	3.78	8719969	458855	67.5	41	MQ	PRJNA1106891	SAMN41497042
GCF_040681535.1	Nocardia fluminea	Nocardia	fluminea	OK	Scaffold	98.79	2.65	6850918	822474	68	25	MQ	PRJNA1106891	SAMN41496402
GCF_040682535.1	Kribbella sp. NPDC051137	Kribbella	sp.	OK	Scaffold	98.08	3.78	8745666	931121	69.5	25	MQ	PRJNA1106891	SAMN41496810
GCF_040683015.1	Nocardia sp. NPDC051030	Nocardia	sp.	OK	Scaffold	98.02	3.81	8426396	402803	66.5	37	MQ	PRJNA1106891	SAMN41497032
GCF_040683415.1	Micromonospora chalcea	Micromonospora	chalcea	OK	Scaffold	98.3	4.24	6803954	417247	73	35	MQ	PRJNA1106891	SAMN41497105
GCF_040683695.1	Micromonospora sp. NPDC093244	Micromonospora	sp.	OK	Scaffold	97.56	2	6362198	673207	71.5	21	MQ	PRJNA1106891	SAMN41496867
GCF_040686315.1	Micromonospora sp. NPDC085948	Micromonospora	sp.	OK	Scaffold	98.17	4.73	7443163	311035	71.5	48	MQ	PRJNA1106891	SAMN41497264
GCF_040687575.1	Kribbella sp. NPDC056861	Kribbella	sp.	OK	Scaffold	97.31	3.78	8971593	730914	68	28	MQ	PRJNA1106891	SAMN41496428
GCF_040704315.1	Micromonospora sp. NPDC047644	Micromonospora	sp.	OK	Scaffold	97.98	2.52	6919922	292752	71.5	49	MQ	PRJNA1106891	SAMN41499254
GCF_040730185.1	Streptomyces sp. Je 1-332	Streptomyces	sp.	OK	Complete Genome	100	0.19	8274399	8274399	70	1	HQ	PRJNA1130432	SAMN42195892
GCF_040744945.1	Saccharothrix sp. HUAS TT1	Saccharothrix	sp.	OK	Complete Genome	99.9	1.91	8715755	8515408	72.5	2	HQ	PRJNA1132529	SAMN42348151
GCF_040782645.1	Streptomyces sp. HUAS ZL42	Streptomyces	sp.	OK	Complete Genome	100	1.89	9866886	9866886	70.5	1	HQ	PRJNA1131774	SAMN42320771
GCF_040819605.1	Streptomyces rochei	Streptomyces	rochei	OK	Complete Genome	99.53	0.09	8353026	8152953	72.5	2	HQ	PRJNA1136165	SAMN42504400
GCF_040907265.1	Streptomyces sclerotialus	Streptomyces	sclerotialus	OK	Chromosome	99.42	3.66	8276155	8261949	72	2	HQ	PRJNA1097461	SAMN40869749
GCF_040961855.1	Rhodococcus opacus	Rhodococcus	opacus	OK	Complete Genome	94.71	3.55	10511848	8002894	67	4	HQ	PRJNA1028948	SAMN37855109
GCF_041021335.1	Amycolatopsis sp. SB7-3	Amycolatopsis	sp.	OK	Contig	98.83	0.32	8463214	1427925	69	19	MQ	PRJNA1136824	SAMN42556162
GCF_041051855.1	Streptomyces bobili	Streptomyces	bobili	OK	Complete Genome	99.95	0	9925366	9734620	71	3	HQ	PRJNA1139397	SAMN42772705
GCF_041051885.1	Streptomyces sp. R02	Streptomyces	sp.	OK	Complete Genome	100	0	7705810	7339597	72.5	2	HQ	PRJNA1136197	SAMN42505434
GCF_041051895.1	Streptomyces sp. R08	Streptomyces	sp.	OK	Complete Genome	99.62	1.01	10909712	10909712	70	1	HQ	PRJNA1136197	SAMN42505435
GCF_041051905.1	Streptomyces sp. R11	Streptomyces	sp.	OK	Complete Genome	99.62	0.88	9635216	9635216	70	1	HQ	PRJNA1136197	SAMN42505436
GCF_041051945.1	Streptomyces sp. R17	Streptomyces	sp.	OK	Complete Genome	100	0	7622384	7303904	72.5	2	HQ	PRJNA1136197	SAMN42505437
GCF_041051975.1	Streptomyces sp. R21	Streptomyces	sp.	OK	Complete Genome	99.91	2.02	10025769	10013981	70.5	4	HQ	PRJNA1136197	SAMN42505438
GCF_041052385.1	Streptomyces sp. R28	Streptomyces	sp.	OK	Complete Genome	99.23	0	10762582	10762582	70.5	1	HQ	PRJNA1136197	SAMN42505439
GCF_041053035.1	Streptomyces sp. R35	Streptomyces	sp.	OK	Complete Genome	99.91	2.17	11220712	11220712	70	1	HQ	PRJNA1136197	SAMN42505441
GCF_041053045.1	Streptomyces sp. R39	Streptomyces	sp.	OK	Complete Genome	100	0.88	11198551	10785087	71	2	HQ	PRJNA1136197	SAMN42505442
GCF_041053055.1	Streptomyces sp. R41	Streptomyces	sp.	OK	Complete Genome	100	1.52	10462393	10462393	70	1	HQ	PRJNA1136197	SAMN42505443
GCF_041053105.1	Streptomyces sp. R44	Streptomyces	sp.	OK	Complete Genome	99.53	2.53	8892027	8892027	72	1	HQ	PRJNA1136197	SAMN42505444
GCF_041053115.1	Streptomyces sp. Y1	Streptomyces	sp.	OK	Complete Genome	98.11	3.42	8588722	8588722	73.5	1	HQ	PRJNA1136197	SAMN42505445
GCF_041080625.1	Streptomyces sp. CG1	Streptomyces	sp.	OK	Complete Genome	99.56	2.37	11099760	11036148	70.5	2	HQ	PRJNA1140527	SAMN42835462
GCF_041080655.1	Streptomyces sp. CG4	Streptomyces	sp.	OK	Complete Genome	99.62	1.62	10236918	9942351	71	3	HQ	PRJNA1140563	SAMN42836464
GCF_041080665.1	Streptomyces sp. cg2	Streptomyces	sp.	OK	Complete Genome	99.91	2.56	8993317	8975789	72	2	HQ	PRJNA1140542	SAMN42835678
GCF_041080675.1	Streptomyces sp. cg36	Streptomyces	sp.	OK	Complete Genome	99.91	2.56	9022416	8595631	72.5	3	HQ	PRJNA1140539	SAMN42835596
GCF_041200175.1	Streptomyces sp. R33	Streptomyces	sp.	OK	Complete Genome	100	1.1	9100217	8716785	71.5	2	HQ	PRJNA1136197	SAMN42505440
GCF_041228765.1	Rhodococcus wratislaviensis	Rhodococcus	wratislaviensis	OK	Complete Genome	98.92	1.86	9235301	8513930	67	3	HQ	PRJNA1090774	SAMN40573644
GCF_041283565.1	Streptomyces sp. QH1-20	Streptomyces	sp.	OK	Complete Genome	99.91	0.99	8411692	8065090	71	3	HQ	PRJNA1144174	SAMN43028331
GCF_041346945.1	Amycolatopsis sp. cg9	Amycolatopsis	sp.	OK	Complete Genome	99.03	2.76	10637084	10451212	72	2	HQ	PRJNA1140528	SAMN42835463
GCF_041346955.1	Amycolatopsis sp. cg5	Amycolatopsis	sp.	OK	Complete Genome	97.99	3.49	9668754	9668754	68.5	1	HQ	PRJNA1140520	SAMN42831969
GCF_041346965.1	Amycolatopsis sp. cg13	Amycolatopsis	sp.	OK	Complete Genome	98.4	1.14	9677762	9677762	69	1	HQ	PRJNA1140394	SAMN42830862
GCF_041393875.1	Rhodococcus zopfii	Rhodococcus	zopfii	OK	Contig	97.95	1.52	5483724	5477455	68.5	3	MQ	PRJNA974210	SAMN37789998
GCF_041429925.1	Micromonospora zamorensis	Micromonospora	zamorensis	OK	Complete Genome	98.33	4.07	7335492	7335492	71	1	HQ	PRJNA747871	SAMN24016493
GCF_041430295.1	Kribbella sp. NBC_00662	Kribbella	sp.	OK	Complete Genome	98.25	4.62	8231124	8231124	68.5	1	HQ	PRJNA747871	SAMN30553173
GCF_041431075.1	Streptomyces clavifer	Streptomyces	clavifer	OK	Complete Genome	99.91	0.38	8658548	8611805	71	2	HQ	PRJNA747871	SAMN24016256
GCF_041431095.1	Streptomyces sp. NBC_00597	Streptomyces	sp.	OK	Complete Genome	98.96	1.2	7231063	6557618	71.5	3	HQ	PRJNA747871	SAMN30553149
GCF_041431115.1	Streptomyces sp. NBC_00564	Streptomyces	sp.	OK	Chromosome	99.91	1.18	10504038	9901759	70	5	HQ	PRJNA747871	SAMN24016250
GCF_041431135.1	Streptomyces sp. NBC_00554	Streptomyces	sp.	OK	Complete Genome	99.91	1.37	10083910	9993500	70	2	HQ	PRJNA747871	SAMN24016247
GCF_041431155.1	Streptomyces longwoodensis	Streptomyces	longwoodensis	Inconclusive	Complete Genome	100	1.00143	8923325	8069212	72.8	6	HQ	PRJNA747871	SAMN24016245
GCF_041431415.1	Streptomyces sp. NBC_00513	Streptomyces	sp.	OK	Complete Genome	99.75	1.23	8621285	8318248	71.5	4	HQ	PRJNA747871	SAMN30553111
GCF_041432505.1	Streptomyces virginiae	Streptomyces	virginiae	Inconclusive	Complete Genome	99.6441	1.18765	9444650	8933679	71.6	6	HQ	PRJNA747871	SAMN24016234
GCF_041433975.1	Streptomyces sp. NBC_00470	Streptomyces	sp.	OK	Complete Genome	99.91	0.98	11146913	10634140	70.5	3	HQ	PRJNA747871	SAMN30553091
GCF_041433995.1	Streptomyces sp. NBC_00466	Streptomyces	sp.	OK	Complete Genome	99.49	2.21	7654929	7295506	70	3	HQ	PRJNA747871	SAMN24016229
GCF_041434015.1	Streptomyces sp. NBC_00454	Streptomyces	sp.	OK	Complete Genome	99.43	1.7	8190759	7974811	71.5	3	HQ	PRJNA747871	SAMN30553081
GCF_041434035.1	Streptomyces tubercidicus	Streptomyces	tubercidicus	OK	Complete Genome	99.87	0.95	8613235	8613235	70.5	1	HQ	PRJNA747871	SAMN30553053
GCF_041434935.1	Kitasatospora sp. NBC_00374	Kitasatospora	sp.	OK	Complete Genome	98.05	3.69	9219726	8973977	73	3	HQ	PRJNA747871	SAMN30553044
GCF_041435015.1	Streptomyces canus	Streptomyces	canus	Inconclusive	Complete Genome	99.8927	1.07296	10677318	10394168	70.3	5	HQ	PRJNA747871	SAMN30553026
GCF_041435055.1	Streptomyces sp. NBC_00341	Streptomyces	sp.	OK	Complete Genome	100	1.45	9063152	8775322	71	3	HQ	PRJNA747871	SAMN30553019
GCF_041435075.1	Streptomyces virginiae	Streptomyces	virginiae	Inconclusive	Chromosome	100	1.03146	9289131	9257388	71.6	3	HQ	PRJNA747871	SAMN30553011
GCF_041435095.1	Kitasatospora sp. NBC_00315	Kitasatospora	sp.	OK	Complete Genome	98.36	1.55	8329020	8241844	73	4	HQ	PRJNA747871	SAMN30553005
GCF_041435115.1	Streptomyces sp. NBC_00289	Streptomyces	sp.	OK	Complete Genome	99.08	0.51	11001603	10626179	70.5	6	HQ	PRJNA747871	SAMN30552991
GCF_041435135.1	Streptomyces sp. NBC_00280	Streptomyces	sp.	OK	Complete Genome	99.91	1.64	10711384	10398828	70	3	HQ	PRJNA747871	SAMN30552986
GCF_041435155.1	Streptomyces zaomyceticus	Streptomyces	zaomyceticus	OK	Complete Genome	99.53	0.62	9248260	9105393	72	3	HQ	PRJNA747871	SAMN30552985
GCF_041435175.1	Streptomyces virginiae	Streptomyces	virginiae	Inconclusive	Complete Genome	100	0.703271	9016703	9005273	71.6	2	HQ	PRJNA747871	SAMN24016193
GCF_041435195.1	Streptomyces sp. NBC_00224	Streptomyces	sp.	OK	Complete Genome	100	1.33	9182200	8912376	71	3	HQ	PRJNA747871	SAMN30552961
GCF_041435215.1	Streptomyces sp. NBC_01314	Streptomyces	sp.	OK	Complete Genome	100	2.4	11345428	11327816	70.5	2	HQ	PRJNA747871	SAMN24016508
GCF_045040215.1	Micromonospora sp. NBC_01412	Micromonospora	sp.	OK	Complete Genome	100	1.57895	8106527	8106527	72.6	1	HQ	PRJNA747871	SAMN24016575
GCF_041435335.1	Streptomyces sp. NBC_01283	Streptomyces	sp.	OK	Chromosome	99.91	0.38	9594106	9425041	70.5	5	HQ	PRJNA747871	SAMN24016488
GCF_041435355.1	Streptomyces sp. NBC_01276	Streptomyces	sp.	OK	Complete Genome	99.81	3.69	9369175	8225516	72.5	5	HQ	PRJNA747871	SAMN24016484
GCF_041435395.1	Streptomyces sp. NBC_01259	Streptomyces	sp.	OK	Complete Genome	99.87	1.96	8973972	8573239	71	5	HQ	PRJNA747871	SAMN24016468
GCF_041435415.1	Streptomyces mirabilis	Streptomyces	mirabilis	OK	Chromosome	99.53	2.84	12827510	11781953	70	5	HQ	PRJNA747871	SAMN24016463
GCF_041435435.1	Streptomyces sp. NBC_01241	Streptomyces	sp.	OK	Complete Genome	100	0.57	8979200	8856951	69.5	3	HQ	PRJNA747871	SAMN24016456
GCF_041435455.1	Streptomyces sp. NBC_01220	Streptomyces	sp.	OK	Complete Genome	99.81	0	9611794	9155022	70.5	5	HQ	PRJNA747871	SAMN24016441
GCF_041435475.1	Streptomyces sp. NBC_01213	Streptomyces	sp.	OK	Complete Genome	100	0	8456627	8165836	70.5	4	HQ	PRJNA747871	SAMN24016435
GCF_041435495.1	Streptomyces sp. NBC_01116	Streptomyces	sp.	OK	Complete Genome	99.91	1.33	8744813	8621271	72	3	HQ	PRJNA747871	SAMN24016391
GCF_041438585.1	Streptomyces albidoflavus	Streptomyces	albidoflavus	OK	Complete Genome	99.43	0.38	7216567	7025725	73.5	3	HQ	PRJNA747871	SAMN30553490
GCF_041438605.1	Streptomyces albidoflavus	Streptomyces	albidoflavus	OK	Complete Genome	99.8927	0.143062	6972512	6970058	73.1	2	HQ	PRJNA747871	SAMN30553489
GCF_041438665.1	Streptomyces albidoflavus	Streptomyces	albidoflavus	OK	Complete Genome	99	0.88	7209897	7184798	73.5	2	HQ	PRJNA747871	SAMN30553455
GCF_041438685.1	Streptomyces sp. NBC_01732	Streptomyces	sp.	OK	Complete Genome	99.62	1.33	9917334	9123778	70.5	5	HQ	PRJNA747871	SAMN30553443
GCF_041438725.1	Streptomyces sp. NBC_01718	Streptomyces	sp.	OK	Complete Genome	100	0.38	9111388	9017262	69.5	4	HQ	PRJNA747871	SAMN30553432
GCF_041438805.1	Streptomyces sp. NBC_01707	Streptomyces	sp.	OK	Complete Genome	100	0.38	9899169	9577546	69.5	3	HQ	PRJNA747871	SAMN30553425
GCF_041438825.1	Streptomyces albidoflavus	Streptomyces	albidoflavus	OK	Complete Genome	99.43	0.69	7184925	7159790	73.5	2	HQ	PRJNA747871	SAMN30553416
GCF_041438845.1	Streptomyces albidoflavus	Streptomyces	albidoflavus	OK	Complete Genome	99.43	1.01	7362561	7347685	73.5	2	HQ	PRJNA747871	SAMN30553356
GCF_041438865.1	Streptomyces sp. NBC_01471	Streptomyces	sp.	OK	Complete Genome	99.21	1.44	8487842	7903629	70.5	3	HQ	PRJNA747871	SAMN24016612
GCF_041438905.1	Streptomyces sp. NBC_01438	Streptomyces	sp.	OK	Complete Genome	99.62	1.14	7804964	7740673	71	2	HQ	PRJNA747871	SAMN24016594
GCF_041439005.1	Streptomyces griseoaurantiacus	Streptomyces	griseoaurantiacus	OK	Complete Genome	99.79	0.19	7659973	7654876	72.5	2	HQ	PRJNA747871	SAMN24016545
GCF_041464245.1	Rhodococcus sp. NyZ502	Rhodococcus	sp.	OK	Complete Genome	99.59	0	6655040	6253160	62.5	3	HQ	PRJNA1147891	SAMN43173780
GCF_041519305.1	Streptomyces luteireticuli	Streptomyces	luteireticuli	OK	Complete Genome	99.53	3.05	8724805	7906413	72	4	HQ	PRJNA1144677	SAMN43041998
GCF_041875035.1	Rhodococcus qingshengii	Rhodococcus	qingshengii	OK	Complete Genome	99.21	0.33	6274870	6274870	62.5	1	HQ	PRJNA890071	SAMN31266592
GCF_041937565.1	Streptomyces fradiae	Streptomyces	fradiae	OK	Complete Genome	99.34	1.07	6591065	6432763	74.5	3	HQ	PRJNA1156318	SAMN43487822
GCF_042266925.1	Nocardia sp. NPDC056064	Nocardia	sp.	OK	Scaffold	98.98	3.26	6235699	1528837	70	11	MQ	PRJNA1106891	SAMN43787550
GCF_042274505.1	Kitasatospora papulosa	Kitasatospora	papulosa	OK	Scaffold	99.91	0.09	7492375	482045	71	39	MQ	PRJNA1106891	SAMN43787510
GCF_042465715.1	Streptomyces sp. P8-A8	Streptomyces	sp.	OK	Complete Genome	99.91	1.23	10671593	8450988	70.5	5	HQ	PRJNA935111	SAMN33299674
GCF_042466515.1	Streptomyces iranensis	Streptomyces	iranensis	OK	Complete Genome	99.91	1.14	12213033	12213033	71	1	HQ	PRJNA1026072	SAMN37733152
GCF_042650145.1	Nocardia halotolerans	Nocardia	halotolerans	OK	Scaffold	97.3	2.81	5837250	325353	68	49	MQ	PRJNA595761	SAMN43281917
GCF_042650365.1	Nocardia rhizosphaerae	Nocardia	rhizosphaerae	OK	Scaffold	97.19	2.84	6134112	459717	69	34	MQ	PRJNA595761	SAMN43281986
GCF_042652605.1	Amycolatopsis plumensis	Amycolatopsis	plumensis	OK	Contig	98.23	1.43	9905449	9673500	71.5	9	MQ	PRJNA595761	SAMN43282923
GCF_042657685.1	Pseudonocardia sulfidoxydans	Pseudonocardia	sulfidoxydans	OK	Contig	97.08	4.58	7039114	6590211	72.5	4	MQ	PRJNA595761	SAMN43282922
GCF_042661005.1	Kitasatospora paranensis	Kitasatospora	paranensis	OK	Contig	97.62	1.82	8424698	8390573	73.5	2	MQ	PRJNA595761	SAMN43283365
GCF_042666215.1	Micromonospora lupini	Micromonospora	lupini	OK	Scaffold	99.28	1.48	7296244	426608	72	42	MQ	PRJNA595761	SAMN43284523
GCF_042671725.1	Nocardia sp. NPDC127606	Nocardia	sp.	OK	Scaffold	99	3.27	7701145	732126	67.5	31	MQ	PRJNA1106891	SAMN43798767
GCF_042671815.1	Nocardia salmonicida	Nocardia	salmonicida	OK	Scaffold	98.69	3.91	7672763	702545	67.5	30	MQ	PRJNA1106891	SAMN43798758
GCF_042672005.1	Nocardia sp. NPDC127579	Nocardia	sp.	OK	Scaffold	98.11	4.8	7317770	514481	68	30	MQ	PRJNA1106891	SAMN43798747
GCF_042674185.1	Nocardia sp. NPDC056952	Nocardia	sp.	OK	Scaffold	99	3.59	7464774	404106	67.5	49	MQ	PRJNA1106891	SAMN43796008
GCF_042682305.1	Rhodococcus jostii	Rhodococcus	jostii	OK	Contig	98.46	2.21	9646068	7900166	67	6	MQ	PRJNA595761	SAMN43282559
GCF_042714845.1	Nocardia fluminea	Nocardia	fluminea	OK	Scaffold	99.13	2.48	7256012	887843	67.5	26	MQ	PRJNA1106891	SAMN43797384
GCF_042715335.1	Kribbella sp. NPDC058693	Kribbella	sp.	OK	Scaffold	97.41	4.62	8326539	663713	68	35	MQ	PRJNA1106891	SAMN43797394
GCF_042717545.1	Rhodococcus sp. NPDC058639	Rhodococcus	sp.	OK	Scaffold	97.36	0.5	4451052	375310	67	32	MQ	PRJNA1106891	SAMN43797353
GCF_042719695.1	Rhodococcus sp. NPDC058521	Rhodococcus	sp.	OK	Scaffold	95.61	1.37	4479073	220232	64.5	35	MQ	PRJNA1106891	SAMN43797253
GCF_042720495.1	Nocardia sp. NPDC058480	Nocardia	sp.	OK	Scaffold	97.37	3.06	7085761	332410	67	47	MQ	PRJNA1106891	SAMN43797228
GCF_042721755.1	Rhodococcus qingshengii	Rhodococcus	qingshengii	OK	Scaffold	99.59	0.47	6709724	316535	62.5	49	MQ	PRJNA1106891	SAMN43797171
GCF_042723155.1	Nocardia sp. NPDC058379	Nocardia	sp.	OK	Scaffold	97.99	3.15	7497993	389111	70	41	MQ	PRJNA1106891	SAMN43797144
GCF_042726635.1	Nocardia asteroides	Nocardia	asteroides	OK	Scaffold	98.6	2.76	6972329	1017467	70	24	MQ	PRJNA1106891	SAMN43798505
GCF_042728675.1	Rhodococcus sp. NPDC060176	Rhodococcus	sp.	OK	Scaffold	99.25	0.93	7207309	844283	62	32	MQ	PRJNA1106891	SAMN43798467
GCF_042728755.1	Nocardia sp. NPDC060249	Nocardia	sp.	OK	Scaffold	98.73	3.21	7413115	324251	67.5	43	MQ	PRJNA1106891	SAMN43798522
GCF_042753925.1	Nocardia tengchongensis	Nocardia	tengchongensis	OK	Scaffold	97.47	4.85	8027304	369273	68.5	48	MQ	PRJNA1106891	SAMN43797839
GCF_042754145.1	Nocardia tengchongensis	Nocardia	tengchongensis	OK	Scaffold	97.47	4.12	8126673	387614	68.5	47	MQ	PRJNA1106891	SAMN43797836
GCF_042754885.1	Rhodococcus sp. NPDC059179	Rhodococcus	sp.	OK	Scaffold	96.4	1.9	4993004	145094	69	49	MQ	PRJNA1106891	SAMN43797786
GCF_042754945.1	Nocardia sp. NPDC059180	Nocardia	sp.	OK	Scaffold	99.72	0.76	6677338	409471	67	33	MQ	PRJNA1106891	SAMN43797787
GCF_042790355.1	Rhodococcus sp. NPDC056743	Rhodococcus	sp.	OK	Scaffold	99.25	1.12	6627178	390805	62	43	MQ	PRJNA1106891	SAMN43795898
GCF_042792755.1	Nocardia sp. NPDC056611	Nocardia	sp.	OK	Scaffold	97.99	4.14	7787609	608316	68.5	31	MQ	PRJNA1106891	SAMN43795798
GCF_042794655.1	Rhodococcus sp. NPDC056516	Rhodococcus	sp.	OK	Scaffold	99.25	0.75	6473583	517446	62.5	30	MQ	PRJNA1106891	SAMN43795726
GCF_042799795.1	Nocardia sp. NPDC057668	Nocardia	sp.	OK	Scaffold	98.17	4.66	9037890	833382	69	19	MQ	PRJNA1106891	SAMN43796554
GCF_042801505.1	Kitasatospora papulosa	Kitasatospora	papulosa	OK	Scaffold	99.47	0.19	7607033	371588	71	42	MQ	PRJNA1106891	SAMN43796469
GCF_042869175.1	Micromonospora sp. NPDC007208	Micromonospora	sp.	OK	Scaffold	98.09	2.74	7223312	284968	71.5	45	MQ	PRJNA1106891	SAMN43992925
GCF_042871665.1	Micromonospora sp. NPDC005686	Micromonospora	sp.	OK	Scaffold	97.78	3.94	6192658	348618	73	39	MQ	PRJNA1106891	SAMN43992822
GCF_042871765.1	Micromonospora sp. NPDC005553	Micromonospora	sp.	OK	Scaffold	98.09	2.61	7155149	351520	71	40	MQ	PRJNA1106891	SAMN43992817
GCF_042872445.1	Micromonospora sp. NPDC005257	Micromonospora	sp.	OK	Scaffold	97.92	4.81	6293495	373392	73	40	MQ	PRJNA1106891	SAMN43992782
GCF_042872475.1	Micromonospora sp. NPDC005252	Micromonospora	sp.	OK	Scaffold	97.98	2.22	6640924	374445	72	49	MQ	PRJNA1106891	SAMN43992780
GCF_042872525.1	Micromonospora sp. NPDC005254	Micromonospora	sp.	OK	Scaffold	98.17	1.9	6776994	293680	72	39	MQ	PRJNA1106891	SAMN43992781
GCF_042872825.1	Micromonospora profundi	Micromonospora	profundi	OK	Scaffold	97.49	4.25	6816455	313302	71	39	MQ	PRJNA1106891	SAMN43992770
GCF_042872925.1	Micromonospora zamorensis	Micromonospora	zamorensis	OK	Scaffold	98.4	3.22	7009754	338377	71	41	MQ	PRJNA1106891	SAMN43992768
GCF_042872945.1	Micromonospora zamorensis	Micromonospora	zamorensis	OK	Scaffold	97.84	3.72	7025905	458357	71	45	MQ	PRJNA1106891	SAMN43992769
GCF_042873005.1	Micromonospora arida	Micromonospora	arida	OK	Scaffold	98.06	3.19	7150504	358274	71	33	MQ	PRJNA1106891	SAMN43992766
GCF_042873335.1	Rhodococcus pyridinivorans	Rhodococcus	pyridinivorans	OK	Scaffold	96.94	1.81	5055152	247923	68	40	MQ	PRJNA1106891	SAMN43992754
GCF_042873375.1	Kribbella sp. NPDC004875	Kribbella	sp.	OK	Scaffold	99.09	3.78	8417217	738039	69	25	MQ	PRJNA1106891	SAMN43992757
GCF_042873835.1	Kribbella sp. NPDC004536	Kribbella	sp.	OK	Scaffold	98.92	3.36	8164457	1622224	68.5	12	MQ	PRJNA1106891	SAMN43992740
GCF_042874255.1	Nocardia aobensis	Nocardia	aobensis	OK	Scaffold	99.45	3.5	7999590	708821	67.5	27	MQ	PRJNA1106891	SAMN43992719
GCF_042874315.1	Nocardia sp. NPDC004068	Nocardia	sp.	OK	Scaffold	99.05	2.84	8000543	439707	69.5	41	MQ	PRJNA1106891	SAMN43992716
GCF_042874375.1	Nocardia tengchongensis	Nocardia	tengchongensis	OK	Scaffold	97.47	4.74	7745153	381056	68.5	46	MQ	PRJNA1106891	SAMN43992708
GCF_042874435.1	Nocardia amikacinitolerans	Nocardia	amikacinitolerans	OK	Scaffold	99.38	3.9	7811417	450904	68.5	41	MQ	PRJNA1106891	SAMN43992705
GCF_042874705.1	Micromonospora sp. NPDC003816	Micromonospora	sp.	OK	Scaffold	94.7	3.82	6957902	515924	72	30	MQ	PRJNA1106891	SAMN43992693
GCF_042880415.1	Rhodococcus erythropolis	Rhodococcus	erythropolis	OK	Scaffold	95.66	2.65	6373231	256436	62.5	46	MQ	PRJNA1106891	SAMN43797079
GCF_042883805.1	Nocardia sp. NPDC058176	Nocardia	sp.	OK	Scaffold	98.84	3.72	7413109	520091	69	28	MQ	PRJNA1106891	SAMN43796973
GCF_042884395.1	Kitasatospora papulosa	Kitasatospora	papulosa	OK	Scaffold	99.91	0.28	7653829	288769	71	49	MQ	PRJNA1106891	SAMN43796943
GCF_042884695.1	Nocardia sp. NPDC058114	Nocardia	sp.	OK	Scaffold	98.78	3.54	7732070	544669	67.5	36	MQ	PRJNA1106891	SAMN43796929
GCF_042888185.1	Rhodococcus pyridinivorans	Rhodococcus	pyridinivorans	OK	Scaffold	97.06	2.7	5112323	423716	68	33	MQ	PRJNA1106891	SAMN43992649
GCF_042891725.1	Nocardia elegans	Nocardia	elegans	OK	Scaffold	99.25	3.7	7691165	413634	68	38	MQ	PRJNA1106891	SAMN43992536
GCF_042891995.1	Kitasatospora papulosa	Kitasatospora	papulosa	OK	Scaffold	99.91	0.09	7314560	349814	71	43	MQ	PRJNA1106891	SAMN43992528
GCF_042892105.1	Kitasatospora papulosa	Kitasatospora	papulosa	OK	Scaffold	99.91	0.09	7366999	612255	71	26	MQ	PRJNA1106891	SAMN43992527
GCF_042893865.1	Kitasatospora papulosa	Kitasatospora	papulosa	OK	Scaffold	99.91	0.28	7767347	435420	71	35	MQ	PRJNA1106891	SAMN43992488
GCF_042897115.1	Kitasatospora papulosa	Kitasatospora	papulosa	OK	Scaffold	99.91	0.09	7449104	507037	71	36	MQ	PRJNA1106891	SAMN43992415
GCF_042898105.1	Micromonospora sp. NPDC000663	Micromonospora	sp.	OK	Scaffold	97.32	2.99	6315018	484677	71.5	24	MQ	PRJNA1106891	SAMN43992395
GCF_042899035.1	Micromonospora sp. NPDC000212	Micromonospora	sp.	OK	Scaffold	93.79	4.26	6144516	255165	73.5	48	MQ	PRJNA1106891	SAMN43992372
GCF_042899935.1	Kitasatospora papulosa	Kitasatospora	papulosa	OK	Scaffold	99.53	0.09	7363598	376072	71	39	MQ	PRJNA1106891	SAMN43993260
GCF_042900515.1	Kitasatospora papulosa	Kitasatospora	papulosa	OK	Scaffold	99.91	0.09	7423620	407054	71	48	MQ	PRJNA1106891	SAMN43993241
GCF_042900585.1	Kitasatospora papulosa	Kitasatospora	papulosa	OK	Scaffold	99.91	0.09	7682230	356091	71	48	MQ	PRJNA1106891	SAMN43993237
GCF_042900745.1	Kitasatospora papulosa	Kitasatospora	papulosa	OK	Scaffold	99.91	0.47	7974144	456841	71	49	MQ	PRJNA1106891	SAMN43993232
GCF_042900785.1	Kitasatospora papulosa	Kitasatospora	papulosa	OK	Scaffold	99.91	0.28	7691025	355096	71	44	MQ	PRJNA1106891	SAMN43993227
GCF_042900825.1	Kitasatospora papulosa	Kitasatospora	papulosa	OK	Scaffold	99.91	0.09	7604023	495228	71	36	MQ	PRJNA1106891	SAMN43993226
GCF_042900945.1	Kitasatospora papulosa	Kitasatospora	papulosa	OK	Scaffold	99.91	0.09	7389093	689556	71.5	27	MQ	PRJNA1106891	SAMN43993220
GCF_042901225.1	Kitasatospora papulosa	Kitasatospora	papulosa	OK	Scaffold	99.91	0.09	7769987	375718	71	34	MQ	PRJNA1106891	SAMN43993203
GCF_042901245.1	Kitasatospora papulosa	Kitasatospora	papulosa	OK	Scaffold	99.91	0.09	7381848	331156	71	41	MQ	PRJNA1106891	SAMN43993207
GCF_042956595.1	Kitasatospora papulosa	Kitasatospora	papulosa	OK	Scaffold	99.91	0.28	7652475	495249	71	38	MQ	PRJNA1106891	SAMN43993089
GCF_043197015.1	Micromonospora chalcea	Micromonospora	chalcea	OK	Scaffold	98.2	4.42	6779198	318398	73	39	MQ	PRJNA1106891	SAMN43996307
GCF_043197075.1	Pseudonocardia alni	Pseudonocardia	alni	OK	Scaffold	93.41	3.8	5937503	664200	74	26	MQ	PRJNA1106891	SAMN43996308
GCF_043197115.1	Micromonospora sp. NPDC049275	Micromonospora	sp.	OK	Scaffold	97.85	3.53	7446307	304374	71.5	46	MQ	PRJNA1106891	SAMN43996303
GCF_043197215.1	Micromonospora sp. NPDC049203	Micromonospora	sp.	OK	Scaffold	98.29	2.42	6126476	601901	73	32	MQ	PRJNA1106891	SAMN43996295
GCF_043197265.1	Kribbella sp. NPDC049227	Kribbella	sp.	OK	Scaffold	99.09	3.78	9255894	568858	68.5	33	MQ	PRJNA1106891	SAMN43996297
GCF_043197345.1	Micromonospora sp. NPDC049175	Micromonospora	sp.	OK	Scaffold	97.57	4.17	7705122	429135	71.5	45	MQ	PRJNA1106891	SAMN43996292
GCF_043197365.1	Kribbella sp. NPDC049174	Kribbella	sp.	OK	Scaffold	98.08	3.36	9245243	531172	68.5	33	MQ	PRJNA1106891	SAMN43996291
GCF_043197555.1	Micromonospora zamorensis	Micromonospora	zamorensis	OK	Scaffold	98.08	3.59	7152095	681044	71.5	32	MQ	PRJNA1106891	SAMN43996282
GCF_043197975.1	Kribbella sp. NPDC048928	Kribbella	sp.	OK	Scaffold	98.5	3.78	8601526	556154	68.5	27	MQ	PRJNA1106891	SAMN43996261
GCF_043197995.1	Micromonospora tulbaghiae	Micromonospora	tulbaghiae	OK	Scaffold	98.74	1.9	6457780	267976	73	41	MQ	PRJNA1106891	SAMN43996256
GCF_043198115.1	Micromonospora tulbaghiae	Micromonospora	tulbaghiae	OK	Scaffold	98.97	1.34	6504016	402654	73	29	MQ	PRJNA1106891	SAMN43996251
GCF_043198135.1	Micromonospora tulbaghiae	Micromonospora	tulbaghiae	OK	Scaffold	98.63	2.07	6497637	273283	73	42	MQ	PRJNA1106891	SAMN43996253
GCF_043198155.1	Micromonospora sp. NPDC048871	Micromonospora	sp.	OK	Scaffold	92.89	3.1	6112423	320810	70.5	44	MQ	PRJNA1106891	SAMN43996250
GCF_043199615.1	Nocardia fluminea	Nocardia	fluminea	OK	Scaffold	99.4	2.83	7165170	564610	68	30	MQ	PRJNA1106891	SAMN43996205
GCF_043202035.1	Kitasatospora papulosa	Kitasatospora	papulosa	OK	Scaffold	99.91	0.09	7748701	581755	71	47	MQ	PRJNA1106891	SAMN43996111
GCF_043204455.1	Kitasatospora papulosa	Kitasatospora	papulosa	OK	Scaffold	99.91	0.09	7254581	354267	71	44	MQ	PRJNA1106891	SAMN43996043
GCF_043204555.1	Nocardia nova	Nocardia	nova	OK	Scaffold	99.32	2.85	7219810	843086	68	21	MQ	PRJNA1106891	SAMN43996038
GCF_043204655.1	Micromonospora sp. NPDC047762	Micromonospora	sp.	OK	Scaffold	98.32	3.72	7276778	389523	71	32	MQ	PRJNA1106891	SAMN43996030
GCF_043205095.1	Micromonospora sp. NPDC047557	Micromonospora	sp.	OK	Scaffold	98.43	1.63	7049455	341494	72	39	MQ	PRJNA1106891	SAMN43996009
GCF_043523415.1	Streptomyces sp. SGAir0957	Streptomyces	sp.	OK	Complete Genome	99.24	0.38	9887497	8676505	71.5	7	HQ	PRJNA388547	SAMN08222726
GCF_043574655.1	Saccharopolyspora spinosa	Saccharopolyspora	spinosa	OK	Complete Genome	98.76	1	9000237	9000237	68	1	HQ	PRJNA1171939	SAMN44260122
GCF_043950205.1	Kitasatospora sp. HNM1077	Kitasatospora	sp.	OK	Complete Genome	98.86	1.59	8506699	8506699	73	1	HQ	PRJNA1170934	SAMN44114743
GCF_043996095.1	Streptomyces sp. YH02	Streptomyces	sp.	OK	Complete Genome	99.91	1.18	8285116	8285116	72	1	HQ	PRJNA1175558	SAMN44365606
GCF_044227165.1	Rhodococcus ruber	Rhodococcus	ruber	OK	Scaffold	98.44	0.46	5634947	165499	70.5	44	MQ	PRJNA1092353	SAMN40625892
GCF_044461365.1	Amycolatopsis sp. NPDC049868	Amycolatopsis	sp.	OK	Scaffold	99.16	2.1	10154107	352652	68.5	45	MQ	PRJNA1106891	SAMN43996367
GCF_026339755.1	Micromonospora sp. NBC_01655	Micromonospora	sp.	OK	Contig	99.7368	1.57895	7147901	7104363	73.3	2	HQ	PRJNA747871	SAMN30553387
GCF_036046055.1	Nocardia sp. NBC 00403	Nocardia	sp.	OK	Complete Genome	99.6554	1.04048	8725101	8725101	66	1	HQ	PRJNA747871	SAMN30553063
GCF_045039555.1	Streptomyces gougerotii	Streptomyces	gougerotii	OK	Complete Genome	99.8927	0.214592	6721603	6721603	73.5	1	HQ	PRJNA747871	SAMN24016386
GCF_036345915.1	Nocardia sp. NBC 00565	Nocardia	sp.	OK	Complete Genome	99.7494	4.26939	9711624	9711624	65.9	1	HQ	PRJNA747871	SAMN30553136
GCF_045039575.1	Streptomyces anulatus	Streptomyces	anulatus	OK	Complete Genome	99.911	0.533808	8912513	8912513	71.5	1	HQ	PRJNA747871	SAMN24016388
GCF_045039635.1	Streptomyces albidoflavus	Streptomyces	albidoflavus	OK	Complete Genome	99.8927	0.572246	7215712	7134393	73.4	2	HQ	PRJNA747871	SAMN24016390
GCF_045207455.1	Nocardia sp. NBC 00881	Nocardia	sp.	OK	Complete Genome	99.3734	1.82749	8416270	8416270	66.4	1	HQ	PRJNA747871	SAMN30553277
GCF_045039655.1	Streptomyces erythrochromogenes	Streptomyces	erythrochromogenes	Inconclusive	Complete Genome	100	1.05914	9103358	9103358	72.2	1	HQ	PRJNA747871	SAMN24016393
GCF_045039695.1	Streptomyces anulatus	Streptomyces	anulatus	OK	Complete Genome	99.911	0.533808	9596317	9476833	71.3	2	HQ	PRJNA747871	SAMN24016394
GCF_045039705.1	Streptomyces uncialis	Streptomyces	uncialis	Inconclusive	Complete Genome	99.8927	0.912017	8910399	8813451	72.1	2	HQ	PRJNA747871	SAMN24016395
GCF_045208035.1	Nocardia sp. NBC 01009	Nocardia	sp.	OK	Complete Genome	99.7494	2.16165	8613784	8613784	66	1	HQ	PRJNA747871	SAMN30553293
GCF_045039725.1	Streptomyces xanthophaeus	Streptomyces	xanthophaeus	OK	Complete Genome	100	1.05914	9005859	8421525	72	5	HQ	PRJNA747871	SAMN24016397
GCF_045039735.1	Streptomyces rubiginosohelvolus	Streptomyces	rubiginosohelvolus	OK	Complete Genome	99.911	0.169724	7738856	7705305	71.6	2	HQ	PRJNA747871	SAMN24016398
GCF_045039755.1	Streptomyces avidinii	Streptomyces	avidinii	OK	Complete Genome	99.6441	1.11845	9716673	8925254	71.6	5	HQ	PRJNA747871	SAMN24016400
GCF_036327755.1	Nocardia sp. NBC 01503	Nocardia	sp.	OK	Complete Genome	99.7494	3.57665	8525035	8350453	66.3	2	HQ	PRJNA747871	SAMN30553305
GCF_035920445.1	Nocardia sp. NBC 01730	Nocardia	sp.	OK	Complete Genome	99.7494	3.57643	8676891	8676891	66.6	1	HQ	PRJNA747871	SAMN30553442
GCF_045039785.1	Streptomyces microflavus	Streptomyces	microflavus	OK	Complete Genome	99.911	1.05067	8830571	8830571	71.2	1	HQ	PRJNA747871	SAMN24016403
GCF_045039795.1	Streptomyces albidoflavus	Streptomyces	albidoflavus	OK	Complete Genome	99.8927	0.786838	7083045	7083045	73.4	1	HQ	PRJNA747871	SAMN24016404
GCF_045161165.1	Nocardia sp. NBC_00511	Nocardia	sp.	OK	Complete Genome	99.6742	2.65246	9198976	8869918	67.6	2	HQ	PRJNA747871	SAMN24016240
GCF_045040005.1	Nocardia sp. NBC_01377	Nocardia	sp.	OK	Complete Genome	99.7494	1.89014	9632804	8870139	67	4	HQ	PRJNA747871	SAMN24016552
GCF_045040085.1	Nocardia sp. NBC_01388	Nocardia	sp.	OK	Complete Genome	99.9369	2.90088	8957172	8856540	66.4	3	HQ	PRJNA747871	SAMN24016560
GCF_045040275.1	Nocardia sp. NBC_01499	Nocardia	sp.	OK	Complete Genome	99.7494	5.02798	10283473	10283473	66.4	1	HQ	PRJNA747871	SAMN24016628
GCF_036163995.1	Rhodococcus sp. NBC 00294	Rhodococcus	sp.	Inconclusive	Complete Genome	97.9323	0.18797	4841103	4617090	68.4	3	HQ	PRJNA747871	SAMN30552994
GCF_045039855.1	Streptomyces phaeochromogenes	Streptomyces	phaeochromogenes	OK	Complete Genome	99.8927	2.28898	12204320	12118633	70	2	HQ	PRJNA747871	SAMN24016412
GCF_045039865.1	Streptomyces microflavus	Streptomyces	microflavus	OK	Complete Genome	99.911	1.28792	8340736	8340736	71.3	1	HQ	PRJNA747871	SAMN24016413
GCF_036173065.1	Rhodococcus sp. NBC 00297	Rhodococcus	sp.	Inconclusive	Complete Genome	97.9323	0.56391	4808694	4606932	68.3	2	HQ	PRJNA747871	SAMN30552996
GCF_045040855.1	Streptomyces sp. NBC 00009	Streptomyces	sp.	OK	Complete Genome	98.8197	2.19957	8964405	8964405	70.2	1	HQ	PRJNA747871	SAMN30552868
GCF_045040875.1	Streptomyces sp. NBC 00012	Streptomyces	sp.	OK	Complete Genome	99.911	1.47433	9993235	8603417	70.4	3	HQ	PRJNA747871	SAMN30552869
GCF_045039905.1	Streptomyces erythrochromogenes	Streptomyces	erythrochromogenes	Inconclusive	Complete Genome	99.6441	0.940519	8805515	8750824	72.3	2	HQ	PRJNA747871	SAMN24016421
GCF_045040885.1	Streptomyces sp. NBC 00016	Streptomyces	sp.	OK	Complete Genome	100	0.643777	10318149	10227930	71.2	2	HQ	PRJNA747871	SAMN30552870
GCF_045041015.1	Streptomyces sp. NBC 00019	Streptomyces	sp.	OK	Complete Genome	100	1.28755	11694229	11287307	70.1	2	HQ	PRJNA747871	SAMN30552872
GCF_045039975.1	Streptomyces canus	Streptomyces	canus	OK	Complete Genome	100	0.429185	10683296	10683296	70.2	1	HQ	PRJNA747871	SAMN24016548
GCF_045039985.1	Streptomyces anthocyanicus	Streptomyces	anthocyanicus	OK	Complete Genome	100	0.500715	9076858	8344052	72	3	HQ	PRJNA747871	SAMN24016549
GCF_045039995.1	Streptomyces albidoflavus	Streptomyces	albidoflavus	OK	Complete Genome	99.8927	0.572246	7285611	7285611	73.3	1	HQ	PRJNA747871	SAMN24016551
GCF_045041065.1	Streptomyces sp. NBC 00028	Streptomyces	sp.	OK	Complete Genome	100	0.515021	10079672	9741312	70.7	2	HQ	PRJNA747871	SAMN30552876
GCF_045041095.1	Streptomyces sp. NBC 00045	Streptomyces	sp.	OK	Complete Genome	99.5552	1.26179	8523525	7843119	71.7	2	HQ	PRJNA747871	SAMN30552880
GCF_045041115.1	Streptomyces sp. NBC 00046	Streptomyces	sp.	OK	Complete Genome	99.911	1.11845	10092252	8589486	70.3	3	HQ	PRJNA747871	SAMN30552881
GCF_045041125.1	Streptomyces sp. NBC 00048	Streptomyces	sp.	OK	Complete Genome	99.5552	0.960289	9195569	8939669	71.4	2	HQ	PRJNA747871	SAMN30552883
GCF_045041135.1	Streptomyces sp. NBC 00055	Streptomyces	sp.	OK	Complete Genome	100	1.99684	10227720	9547019	69.4	2	HQ	PRJNA747871	SAMN30552887
GCF_045041155.1	Streptomyces sp. NBC 00056	Streptomyces	sp.	OK	Complete Genome	99.1416	2.41416	10567953	10567953	70.3	1	HQ	PRJNA747871	SAMN30552888
GCF_045041165.1	Streptomyces sp. NBC 00057	Streptomyces	sp.	OK	Complete Genome	100	0.751285	9398891	9128849	69.3	2	HQ	PRJNA747871	SAMN30552889
GCF_045041195.1	Streptomyces sp. NBC 00069	Streptomyces	sp.	OK	Complete Genome	99.6441	0.288087	8411765	8050161	71.8	3	HQ	PRJNA747871	SAMN30552895
GCF_045040115.1	Streptomyces microflavus	Streptomyces	microflavus	OK	Complete Genome	99.911	0.279614	8034003	8034003	71.4	1	HQ	PRJNA747871	SAMN24016563
GCF_045041215.1	Streptomyces sp. NBC 00073	Streptomyces	sp.	OK	Complete Genome	99.5552	1.69675	9470237	8571938	71.5	3	HQ	PRJNA747871	SAMN30552897
GCF_045041225.1	Streptomyces sp. NBC 00075	Streptomyces	sp.	OK	Complete Genome	100	2.7897	11717763	11717763	70.2	1	HQ	PRJNA747871	SAMN30552898
GCF_045041235.1	Streptomyces sp. NBC 00076	Streptomyces	sp.	OK	Complete Genome	100	1.28755	10936865	10936865	70.1	1	HQ	PRJNA747871	SAMN30552899
GCF_045040175.1	Streptomyces phaeochromogenes	Streptomyces	phaeochromogenes	OK	Complete Genome	99.8927	0.858369	11619802	11619802	70.2	1	HQ	PRJNA747871	SAMN24016572
GCF_045041245.1	Streptomyces sp. NBC 00079	Streptomyces	sp.	OK	Complete Genome	100	0.429185	10168563	10168563	70.2	1	HQ	PRJNA747871	SAMN30552901
GCF_045041255.1	Streptomyces sp. NBC 00080	Streptomyces	sp.	OK	Complete Genome	100	0	10314843	9753591	71.1	2	HQ	PRJNA747871	SAMN30552902
GCF_045041265.1	Streptomyces sp. NBC 00081	Streptomyces	sp.	OK	Complete Genome	99.5708	2.19957	10386121	10386121	70.4	1	HQ	PRJNA747871	SAMN30552903
GCF_045040225.1	Nocardia salmonicida	Nocardia	salmonicida	OK	Complete Genome	99.812	1.52882	7450637	7450637	67.2	1	HQ	PRJNA747871	SAMN24016576
GCF_045040235.1	Streptomyces anulatus	Streptomyces	anulatus	OK	Complete Genome	99.911	0.177936	9176897	8728677	71.4	4	HQ	PRJNA747871	SAMN24016578
GCF_045040245.1	Streptomyces anulatus	Streptomyces	anulatus	OK	Complete Genome	99.911	0.355872	8718487	8718487	71.4	1	HQ	PRJNA747871	SAMN24016579
GCF_045040255.1	Streptomyces anulatus	Streptomyces	anulatus	OK	Complete Genome	99.911	0.177936	9129229	9038323	71.5	2	HQ	PRJNA747871	SAMN24016580
GCF_045041305.1	Streptomyces sp. NBC 00096	Streptomyces	sp.	OK	Complete Genome	98.9324	2.12676	7548502	7548502	72	1	HQ	PRJNA747871	SAMN30552910
GCF_045041425.1	Streptomyces sp. NBC 00101	Streptomyces	sp.	OK	Complete Genome	99.1993	0	7155979	7155979	72.1	1	HQ	PRJNA747871	SAMN30552912
GCF_045041445.1	Streptomyces sp. NBC 00110	Streptomyces	sp.	OK	Complete Genome	99.5708	0.482833	9579069	9579069	70.4	1	HQ	PRJNA747871	SAMN30552916
GCF_045040305.1	Streptomyces niveus	Streptomyces	niveus	OK	Complete Genome	99.911	0.901542	8486574	8486574	70.7	1	HQ	PRJNA747871	SAMN24016632
GCF_045205785.1	Streptomyces sp. NBC 00111	Streptomyces	sp.	OK	Complete Genome	100	0.948992	8848439	8598998	71.2	3	HQ	PRJNA747871	SAMN30552917
GCF_045205945.1	Streptomyces sp. NBC 00114	Streptomyces	sp.	OK	Complete Genome	99.8927	0.0536481	9317281	9317281	70.1	1	HQ	PRJNA747871	SAMN30552919
GCF_045206085.1	Streptomyces sp. NBC 00117	Streptomyces	sp.	OK	Complete Genome	99.5708	1.98498	11132734	11132734	70	1	HQ	PRJNA747871	SAMN30552921
GCF_045040355.1	Streptomyces anulatus	Streptomyces	anulatus	OK	Complete Genome	99.911	0.177936	9084884	8807327	71.3	3	HQ	PRJNA747871	SAMN24016637
GCF_045206155.1	Streptomyces sp. NBC 00118	Streptomyces	sp.	OK	Complete Genome	99.5708	2.19957	10245735	10245735	70.4	1	HQ	PRJNA747871	SAMN30552922
GCF_045040385.1	Streptomyces anulatus	Streptomyces	anulatus	OK	Complete Genome	99.911	0.533808	8837433	8837433	71.4	1	HQ	PRJNA747871	SAMN24016641
GCF_045040395.1	Streptomyces anulatus	Streptomyces	anulatus	OK	Complete Genome	99.911	0.44484	9506639	8858288	71.4	3	HQ	PRJNA747871	SAMN24016642
GCF_045206235.1	Streptomyces sp. NBC 00134	Streptomyces	sp.	OK	Complete Genome	99.5708	2.41416	10368594	10315281	70.4	2	HQ	PRJNA747871	SAMN30552929
GCF_045206255.1	Streptomyces sp. NBC 00144	Streptomyces	sp.	OK	Complete Genome	99.7034	4.03321	8601288	8573167	70.2	2	HQ	PRJNA747871	SAMN30552932
GCF_045206265.1	Streptomyces sp. NBC 00147	Streptomyces	sp.	OK	Complete Genome	99.4993	2.41416	11321263	11165668	70	2	HQ	PRJNA747871	SAMN30552934
GCF_045040435.1	Streptomyces niveus	Streptomyces	niveus	OK	Complete Genome	99.911	0.901542	8603154	8603154	70.7	1	HQ	PRJNA747871	SAMN24016646
GCF_045206305.1	Streptomyces sp. NBC 00191	Streptomyces	sp.	OK	Complete Genome	100	1.8189	8493622	8493622	69.6	1	HQ	PRJNA747871	SAMN30552946
GCF_045206315.1	Streptomyces sp. NBC 00197	Streptomyces	sp.	OK	Complete Genome	99.8927	0	9282310	9282310	71.3	1	HQ	PRJNA747871	SAMN30552948
GCF_045206325.1	Streptomyces sp. NBC 00203	Streptomyces	sp.	OK	Complete Genome	99.8927	1.51645	10799792	10799792	70.1	1	HQ	PRJNA747871	SAMN30552952
GCF_045040845.1	Streptomyces canus	Streptomyces	canus	OK	Complete Genome	100	0.858369	10841726	10841726	70.1	1	HQ	PRJNA747871	SAMN30552866
GCF_045206345.1	Streptomyces sp. NBC 00209	Streptomyces	sp.	OK	Complete Genome	99.2171	1.06762	7224412	6999100	71.6	2	HQ	PRJNA747871	SAMN30552955
GCF_045206355.1	Streptomyces sp. NBC 00211	Streptomyces	sp.	OK	Complete Genome	99.5552	1.61766	9172325	8566898	71.6	2	HQ	PRJNA747871	SAMN30552956
GCF_045206365.1	Streptomyces sp. NBC 00212	Streptomyces	sp.	OK	Complete Genome	100	0.965665	9180837	8657633	70.6	3	HQ	PRJNA747871	SAMN30552957
GCF_045040895.1	Streptomyces purpurascens	Streptomyces	purpurascens	OK	Complete Genome	100	0	9188115	9188115	71.1	1	HQ	PRJNA747871	SAMN30552871
GCF_045206375.1	Streptomyces sp. NBC 00499	Streptomyces	sp.	OK	Complete Genome	98.8197	1.71674	11146907	11146907	70.5	1	HQ	PRJNA747871	SAMN30553104
GCF_045041025.1	Streptomyces canus	Streptomyces	canus	Inconclusive	Complete Genome	99.8927	1.07296	10471625	10220600	70.3	3	HQ	PRJNA747871	SAMN30552873
GCF_045041055.1	Streptomyces jietaisiensis	Streptomyces	jietaisiensis	OK	Complete Genome	100	0	7619196	7551461	72.6	2	HQ	PRJNA747871	SAMN30552874
GCF_045206415.1	Streptomyces sp. NBC 00519	Streptomyces	sp.	OK	Complete Genome	99.8927	0.858369	10093605	10093605	70.3	1	HQ	PRJNA747871	SAMN30553114
GCF_045041085.1	Kitasatospora papulosa	Streptomyces	papulosa	OK	Complete Genome	99.911	0.088968	7632029	7381025	71	2	HQ	PRJNA747871	SAMN30552879
GCF_045206645.1	Streptomyces sp. NBC 00623	Streptomyces	sp.	OK	Complete Genome	100	2.66904	9715470	9715470	69.5	1	HQ	PRJNA747871	SAMN30553155
GCF_045206735.1	Streptomyces sp. NBC 00624	Streptomyces	sp.	OK	Complete Genome	100	0.652432	9102856	8941894	69.7	2	HQ	PRJNA747871	SAMN30553156
GCF_045206895.1	Streptomyces sp. NBC 00631	Streptomyces	sp.	OK	Complete Genome	100	1.65951	11076837	11076837	70.9	1	HQ	PRJNA747871	SAMN30553158
GCF_045207235.1	Streptomyces sp. NBC 00645	Streptomyces	sp.	OK	Complete Genome	100	0.562027	10024984	10024984	70.9	1	HQ	PRJNA747871	SAMN30553166
GCF_045207245.1	Streptomyces sp. NBC 00647	Streptomyces	sp.	OK	Complete Genome	100	0.482833	10660720	10660720	70.6	1	HQ	PRJNA747871	SAMN30553167
GCF_045207255.1	Streptomyces sp. NBC 00648	Streptomyces	sp.	OK	Complete Genome	98.9324	1.77936	8673992	8450570	71.2	2	HQ	PRJNA747871	SAMN30553168
GCF_045041185.1	Kitasatospora purpeofusca	Kitasatospora	purpeofusca	OK	Complete Genome	98.9474	1.49123	8106570	8106570	73.3	1	HQ	PRJNA747871	SAMN30552892
GCF_045207265.1	Streptomyces sp. NBC 00649	Streptomyces	sp.	OK	Complete Genome	100	2.46781	10292842	10292842	70.4	1	HQ	PRJNA747871	SAMN30553169
GCF_045207275.1	Streptomyces sp. NBC 00658	Streptomyces	sp.	OK	Complete Genome	99.8927	0.912017	10852492	10852492	69.8	1	HQ	PRJNA747871	SAMN30553171
GCF_036226785.1	Streptomyces sp. NBC 00669	Streptomyces	sp.	Inconclusive	Complete Genome	100	0.526316	9601491	9601491	72.7	1	HQ	PRJNA747871	SAMN30553178
GCF_045207285.1	Streptomyces sp. NBC 00715	Streptomyces	sp.	OK	Complete Genome	99.8927	0	9698432	9532931	71.2	2	HQ	PRJNA747871	SAMN30553196
GCF_045207305.1	Streptomyces sp. NBC 00842	Streptomyces	sp.	OK	Complete Genome	99.5552	4.32977	9686107	9394497	69.4	3	HQ	PRJNA747871	SAMN30553257
GCF_045207325.1	Streptomyces sp. NBC 00846	Streptomyces	sp.	OK	Complete Genome	100	0.355872	8832824	8228393	69.7	3	HQ	PRJNA747871	SAMN30553259
GCF_045207415.1	Streptomyces sp. NBC 00873	Streptomyces	sp.	OK	Complete Genome	99.5552	4.32977	9733076	9406006	69.4	3	HQ	PRJNA747871	SAMN30553272
GCF_045207435.1	Streptomyces sp. NBC 00876	Streptomyces	sp.	OK	Complete Genome	99.6441	1.20996	8636389	8497307	70.7	2	HQ	PRJNA747871	SAMN30553274
GCF_045041275.1	Kitasatospora papulosa	Streptomyces	papulosa	OK	Complete Genome	99.911	0.088968	7588299	7588299	71	1	HQ	PRJNA747871	SAMN30552904
GCF_045041285.1	Streptomyces canus	Streptomyces	canus	Inconclusive	Complete Genome	99.8927	1.07296	10759054	10583563	70.3	2	HQ	PRJNA747871	SAMN30552906
GCF_045041295.1	Streptomyces zaomyceticus	Streptomyces	zaomyceticus	OK	Complete Genome	99.4635	0.19671	9149969	9025424	71.8	2	HQ	PRJNA747871	SAMN30552907
GCF_045207445.1	Streptomyces sp. NBC 00879	Streptomyces	sp.	OK	Complete Genome	100	2.80941	8556030	8556030	69.7	1	HQ	PRJNA747871	SAMN30553276
GCF_045041415.1	Streptomyces coelicoflavus	Streptomyces	coelicoflavus	OK	Complete Genome	100	0.536481	8418602	7979235	72.2	3	HQ	PRJNA747871	SAMN30552911
GCF_045207465.1	Streptomyces sp. NBC 00882	Streptomyces	sp.	OK	Complete Genome	99.8927	0.786838	10957798	10957798	70.1	1	HQ	PRJNA747871	SAMN30553278
GCF_045207475.1	Streptomyces sp. NBC 00885	Streptomyces	sp.	OK	Complete Genome	100	2.60182	8737832	8737832	69.6	1	HQ	PRJNA747871	SAMN30553279
GCF_045160145.1	Streptomyces canus	Streptomyces	canus	OK	Complete Genome	100	0.572246	11315041	11315041	70.1	1	HQ	PRJNA747871	SAMN24016138
GCF_045207585.1	Streptomyces sp. NBC 00887	Streptomyces	sp.	OK	Complete Genome	100	23.6062	10314838	10004517	69.9	4	HQ	PRJNA747871	SAMN30553281
GCF_036227245.1	Streptomyces sp. NBC 01477	Streptomyces	sp.	Inconclusive	Complete Genome	99.4737	0.526316	8465517	8465517	72.3	1	HQ	PRJNA747871	SAMN30553301
GCF_045208255.1	Streptomyces sp. NBC 01544	Streptomyces	sp.	OK	Complete Genome	100	0.88968	9391026	9135262	69.5	3	HQ	PRJNA747871	SAMN30553308
GCF_045208355.1	Streptomyces sp. NBC 01546	Streptomyces	sp.	OK	Complete Genome	99.4662	0.406711	8941998	8512486	71.3	2	HQ	PRJNA747871	SAMN30553310
GCF_045208365.1	Streptomyces sp. NBC 01547	Streptomyces	sp.	OK	Complete Genome	99.6441	3.05033	9017834	8896641	71.9	2	HQ	PRJNA747871	SAMN30553311
GCF_045208375.1	Streptomyces sp. NBC 01550	Streptomyces	sp.	OK	Complete Genome	100	0.533808	9178518	9178518	69.6	1	HQ	PRJNA747871	SAMN30553314
GCF_045208425.1	Streptomyces sp. NBC 01563	Streptomyces	sp.	OK	Complete Genome	100	1.81043	10389979	9784603	70.5	2	HQ	PRJNA747871	SAMN30553323
GCF_045160785.1	Streptomyces zaomyceticus	Streptomyces	zaomyceticus	OK	Complete Genome	99.4635	0.19671	9595328	9226324	71.7	3	HQ	PRJNA747871	SAMN24016153
GCF_045160795.1	Streptomyces zaomyceticus	Streptomyces	zaomyceticus	OK	Complete Genome	99.4635	0.482833	9669843	9221812	71.6	3	HQ	PRJNA747871	SAMN24016156
GCF_045208445.1	Streptomyces sp. NBC 01568	Streptomyces	sp.	OK	Complete Genome	99.6441	3.05033	9518220	9315419	71.7	3	HQ	PRJNA747871	SAMN30553326
GCF_045208465.1	Streptomyces sp. NBC 01578	Streptomyces	sp.	OK	Complete Genome	100	2.25386	10106618	10106618	69.4	1	HQ	PRJNA747871	SAMN30553329
GCF_045208475.1	Streptomyces sp. NBC 01579	Streptomyces	sp.	OK	Complete Genome	100	2.64927	9844613	9747936	69.5	2	HQ	PRJNA747871	SAMN30553330
GCF_045208525.1	Streptomyces sp. NBC 01589	Streptomyces	sp.	OK	Complete Genome	100	3.46975	10719239	10719239	69.3	1	HQ	PRJNA747871	SAMN30553336
GCF_045208535.1	Streptomyces sp. NBC 01590	Streptomyces	sp.	OK	Complete Genome	99.911	1.11845	10062210	8699901	70.4	3	HQ	PRJNA747871	SAMN30553337
GCF_045208545.1	Streptomyces sp. NBC 01594	Streptomyces	sp.	OK	Complete Genome	100	3.46975	10712234	10712234	69.3	1	HQ	PRJNA747871	SAMN30553340
GCF_045160875.1	Streptomyces achromogenes	Streptomyces	achromogenes	OK	Complete Genome	100	0.572246	8525584	8525584	72.4	1	HQ	PRJNA747871	SAMN24016170
GCF_045208625.1	Streptomyces sp. NBC 01597	Streptomyces	sp.	OK	Complete Genome	99.8927	0.858369	10258656	10258656	70.3	1	HQ	PRJNA747871	SAMN30553342
GCF_045160905.1	Streptomyces virginiae	Streptomyces	virginiae	Inconclusive	Complete Genome	99.6441	1.77089	9008657	8837448	71.7	4	HQ	PRJNA747871	SAMN24016176
GCF_045208745.1	Streptomyces sp. NBC 01602	Streptomyces	sp.	OK	Complete Genome	100	2.84698	9975297	9975297	69.4	1	HQ	PRJNA747871	SAMN30553346
GCF_045160935.1	Streptomyces virginiae	Streptomyces	virginiae	Inconclusive	Complete Genome	99.6441	1.82031	9252910	9252910	71.6	1	HQ	PRJNA747871	SAMN24016179
GCF_045160945.1	Kitasatospora papulosa	Streptomyces	papulosa	OK	Complete Genome	99.911	0.088968	7697835	7580126	71	2	HQ	PRJNA747871	SAMN24016182
GCF_045208795.1	Streptomyces sp. NBC 01604	Streptomyces	sp.	OK	Complete Genome	100	2.30488	11496400	11496400	70.5	1	HQ	PRJNA747871	SAMN30553347
GCF_045161095.1	Streptomyces virginiae	Streptomyces	virginiae	Inconclusive	Complete Genome	99.6441	0.782353	9188645	9149801	71.6	2	HQ	PRJNA747871	SAMN24016192
GCF_045209205.1	Streptomyces sp. NBC 01613	Streptomyces	sp.	OK	Complete Genome	100	1.43062	13572980	13572980	70.1	1	HQ	PRJNA747871	SAMN30553353
GCF_045161275.1	Streptomyces platensis	Streptomyces	platensis	OK	Complete Genome	99.911	0.336101	8700481	8700481	71	1	HQ	PRJNA747871	SAMN24016254
GCF_045161325.1	Streptomyces longwoodensis	Streptomyces	longwoodensis	Inconclusive	Complete Genome	100	1.71674	8439505	8439505	72.9	1	HQ	PRJNA747871	SAMN24016255
GCF_045209255.1	Streptomyces sp. NBC 01614	Streptomyces	sp.	OK	Complete Genome	100	0.858369	11354032	11354032	70	1	HQ	PRJNA747871	SAMN30553354
GCF_045161705.1	Streptomyces longwoodensis	Streptomyces	longwoodensis	Inconclusive	Complete Genome	100	0.858369	8544832	8140478	73	3	HQ	PRJNA747871	SAMN24016265
GCF_045209325.1	Streptomyces sp. NBC 01615	Streptomyces	sp.	OK	Complete Genome	99.8927	2.16023	11635954	11635954	70	1	HQ	PRJNA747871	SAMN30553355
GCF_045209375.1	Streptomyces sp. NBC 01617	Streptomyces	sp.	OK	Complete Genome	100	0.88968	9309870	9309870	69.5	1	HQ	PRJNA747871	SAMN30553357
GCF_045209435.1	Streptomyces sp. NBC 01618	Streptomyces	sp.	OK	Complete Genome	99.6441	2.64927	8232760	8232760	69.8	1	HQ	PRJNA747871	SAMN30553358
GCF_045209515.1	Streptomyces sp. NBC 01620	Streptomyces	sp.	OK	Complete Genome	100	0.88968	9465816	9465816	69.5	1	HQ	PRJNA747871	SAMN30553360
GCF_045209635.1	Streptomyces sp. NBC 01622	Streptomyces	sp.	OK	Complete Genome	99.8927	0.26824	11696066	11696066	70	1	HQ	PRJNA747871	SAMN30553362
GCF_045161765.1	Streptomyces longwoodensis	Streptomyces	longwoodensis	Inconclusive	Complete Genome	100	2.14592	8585791	8550865	72.9	2	HQ	PRJNA747871	SAMN24016278
GCF_045209715.1	Streptomyces sp. NBC 01635	Streptomyces	sp.	OK	Complete Genome	100	0.965665	9003324	8982372	71	2	HQ	PRJNA747871	SAMN30553371
GCF_045209735.1	Streptomyces sp. NBC 01637	Streptomyces	sp.	OK	Complete Genome	100	3.73665	10339639	10339639	69.4	1	HQ	PRJNA747871	SAMN30553373
GCF_045209785.1	Streptomyces sp. NBC 01643	Streptomyces	sp.	OK	Complete Genome	100	2.45917	10899259	10186474	69.2	2	HQ	PRJNA747871	SAMN30553378
GCF_045161805.1	Streptomyces virginiae	Streptomyces	virginiae	Inconclusive	Complete Genome	99.6441	2.25527	9235713	8878587	71.5	2	HQ	PRJNA747871	SAMN24016284
GCF_045161815.1	Streptomyces avidinii	Streptomyces	avidinii	OK	Complete Genome	99.6441	0.940519	9032248	9032248	71.8	1	HQ	PRJNA747871	SAMN24016285
GCF_045161825.1	Streptomyces cyaneofuscatus	Streptomyces	cyaneofuscatus	Inconclusive	Complete Genome	99.911	1.33452	8505222	8236804	71.4	2	HQ	PRJNA747871	SAMN24016286
GCF_045288605.1	Streptomyces sp. NBC 01794	Streptomyces	sp.	OK	Complete Genome	100	2.22815	9346788	9341351	69.4	2	HQ	PRJNA747871	SAMN30553492
GCF_045161845.1	Streptomyces antimycoticus	Streptomyces	antimycoticus	OK	Complete Genome	100	1.84211	10880213	10880213	70.8	1	HQ	PRJNA747871	SAMN24016289
GCF_045161855.1	Streptomyces niveus	Streptomyces	niveus	OK	Complete Genome	99.911	0.901542	8502813	8502813	70.7	1	HQ	PRJNA747871	SAMN24016290
GCF_045160215.1	Streptomyces sp. NBC_00005	Streptomyces	sp.	OK	Complete Genome	100	0.608011	11081806	11027269	70.3	2	HQ	PRJNA747871	SAMN24016140
GCF_045161875.1	Kitasatospora papulosa	Streptomyces	papulosa	OK	Complete Genome	99.911	0.088968	7891710	7891710	70.9	1	HQ	PRJNA747871	SAMN24016293
GCF_045160325.1	Streptomyces sp. NBC_00015	Streptomyces	sp.	OK	Complete Genome	100	0.143062	11241544	9988155	71	3	HQ	PRJNA747871	SAMN24016142
GCF_045160415.1	Streptomyces sp. NBC_00024	Streptomyces	sp.	OK	Complete Genome	100	1.00143	11459578	11459578	70.7	1	HQ	PRJNA747871	SAMN24016144
GCF_045162015.1	Streptomyces goshikiensis	Streptomyces	goshikiensis	OK	Complete Genome	99.6441	1.43832	8923407	7956497	72	5	HQ	PRJNA747871	SAMN24016300
GCF_045160505.1	Streptomyces sp. NBC_00029	Streptomyces	sp.	OK	Complete Genome	99.6441	0.347399	8802311	8802311	71.8	1	HQ	PRJNA747871	SAMN24016146
GCF_045160595.1	Streptomyces sp. NBC_00035	Streptomyces	sp.	OK	Complete Genome	99.4635	0.858369	10425166	10425166	69.9	1	HQ	PRJNA747871	SAMN24016148
GCF_045162305.1	Streptomyces halstedii	Streptomyces	halstedii	OK	Complete Genome	99.911	0.101678	7237177	7237177	72	1	HQ	PRJNA747871	SAMN24016316
GCF_045160715.1	Streptomyces sp. NBC_00040	Streptomyces	sp.	OK	Complete Genome	99.6441	3.05033	8938955	8859902	71.9	2	HQ	PRJNA747871	SAMN24016151
GCF_045160815.1	Streptomyces sp. NBC_00090	Streptomyces	sp.	OK	Complete Genome	99.8927	0.625894	9250702	9250702	71.7	1	HQ	PRJNA747871	SAMN24016159
GCF_045160825.1	Streptomyces sp. NBC_00104	Streptomyces	sp.	OK	Complete Genome	100	0.429185	10698161	10684609	70.9	2	HQ	PRJNA747871	SAMN24016161
GCF_045160835.1	Streptomyces sp. NBC_00105	Streptomyces	sp.	OK	Complete Genome	99.5552	1.3557	9662330	9538619	71.7	2	HQ	PRJNA747871	SAMN24016162
GCF_045160845.1	Streptomyces sp. NBC_00122	Streptomyces	sp.	OK	Complete Genome	99.5552	0.960289	7735569	7404623	71.7	3	HQ	PRJNA747871	SAMN24016164
GCF_045162665.1	Streptomyces anulatus	Streptomyces	anulatus	OK	Complete Genome	99.911	0.533808	9104665	9076472	71.5	2	HQ	PRJNA747871	SAMN24016325
GCF_045160855.1	Streptomyces sp. NBC_00133	Streptomyces	sp.	OK	Complete Genome	100	2.87663	8919990	8919990	69.6	1	HQ	PRJNA747871	SAMN24016166
GCF_045162685.1	Streptomyces canus	Streptomyces	canus	Inconclusive	Complete Genome	99.8927	1.14092	12157638	11769262	70.1	2	HQ	PRJNA747871	SAMN24016335
GCF_045160885.1	Streptomyces sp. NBC_00158	Streptomyces	sp.	OK	Complete Genome	100	1.21602	8418073	7643608	73	3	HQ	PRJNA747871	SAMN24016171
GCF_045162705.1	Streptomyces globisporus	Streptomyces	globisporus	OK	Complete Genome	99.911	0.355872	7957062	7662562	71.4	2	HQ	PRJNA747871	SAMN24016337
GCF_045160915.1	Streptomyces sp. NBC_00169	Streptomyces	sp.	OK	Complete Genome	99.8927	0.643777	10117317	10117317	70.6	1	HQ	PRJNA747871	SAMN24016177
GCF_045160975.1	Streptomyces sp. NBC_00210	Streptomyces	sp.	OK	Complete Genome	100	2.87663	8783391	8783391	69.6	1	HQ	PRJNA747871	SAMN24016188
GCF_045162735.1	Streptomyces anulatus	Streptomyces	anulatus	OK	Complete Genome	99.911	0	8857495	8509935	71.6	3	HQ	PRJNA747871	SAMN24016340
GCF_045162745.1	Streptomyces phaeochromogenes	Streptomyces	phaeochromogenes	OK	Complete Genome	99.8927	0.643777	12306107	12239699	70	2	HQ	PRJNA747871	SAMN24016341
GCF_036014115.1	Streptomyces sp. NBC_00448	Streptomyces	sp.	Inconclusive	Complete Genome	100	0	9648495	9648495	72.4	1	HQ	PRJNA747871	SAMN24016224
GCF_045161545.1	Streptomyces sp. NBC_00637	Streptomyces	sp.	OK	Complete Genome	100	1.00143	9327070	8562389	71.5	4	HQ	PRJNA747871	SAMN24016262
GCF_045161715.1	Streptomyces sp. NBC_00656	Streptomyces	sp.	OK	Complete Genome	100	0.711744	9575572	9575572	70.7	1	HQ	PRJNA747871	SAMN24016266
GCF_045162785.1	Streptomyces decoyicus	Streptomyces	decoyicus	OK	Complete Genome	100	1.31579	9230757	9230757	70.8	1	HQ	PRJNA747871	SAMN24016345
GCF_045161725.1	Streptomyces sp. NBC_00723	Streptomyces	sp.	OK	Complete Genome	100	0.107296	10285797	9871954	71.1	2	HQ	PRJNA747871	SAMN24016274
GCF_045162805.1	Streptomyces fimicarius	Streptomyces	fimicarius	OK	Complete Genome	99.911	0.948992	8537117	8537117	71.6	1	HQ	PRJNA747871	SAMN24016348
GCF_045161735.1	Streptomyces sp. NBC_00726	Streptomyces	sp.	OK	Complete Genome	100	1.42349	6875124	6652437	71.8	2	HQ	PRJNA747871	SAMN24016275
GCF_045162825.1	Streptomyces prunicolor	Streptomyces	prunicolor	OK	Complete Genome	99.5708	2.00286	10948847	10948847	69.8	1	HQ	PRJNA747871	SAMN24016350
GCF_045161745.1	Streptomyces sp. NBC_00727	Streptomyces	sp.	OK	Complete Genome	100	0.533808	7280754	7071489	71.6	2	HQ	PRJNA747871	SAMN24016276
GCF_045162845.1	Streptomyces anulatus	Streptomyces	anulatus	OK	Complete Genome	99.911	0.177936	8984110	8984110	71.4	1	HQ	PRJNA747871	SAMN24016379
GCF_045161755.1	Streptomyces sp. NBC_00728	Streptomyces	sp.	OK	Complete Genome	100	1.60944	9651205	9651205	70.9	1	HQ	PRJNA747871	SAMN24016277
GCF_045162865.1	Streptomyces globisporus	Streptomyces	globisporus	OK	Complete Genome	99.911	0.355872	9240663	7981951	71.1	5	HQ	PRJNA747871	SAMN24016381
GCF_045161775.1	Streptomyces sp. NBC_00827	Streptomyces	sp.	OK	Complete Genome	99.8927	0.858369	9465861	9465861	69.9	1	HQ	PRJNA747871	SAMN24016281
GCF_045161785.1	Streptomyces sp. NBC_00828	Streptomyces	sp.	OK	Complete Genome	99.6781	1.93133	11509881	11499239	69.8	2	HQ	PRJNA747871	SAMN24016282
GCF_045161795.1	Streptomyces sp. NBC_00829	Streptomyces	sp.	OK	Complete Genome	100	2.22886	9312804	8850733	69.7	3	HQ	PRJNA747871	SAMN24016283
GCF_045206015.1	Streptomyces anthocyanicus	Streptomyces	anthocyanicus	OK	Complete Genome	100	0	8505006	8505006	72.2	1	HQ	PRJNA747871	SAMN30552920
GCF_045161835.1	Streptomyces sp. NBC_00838	Streptomyces	sp.	OK	Complete Genome	99.5552	1.06762	8580597	8580597	70.9	1	HQ	PRJNA747871	SAMN24016288
GCF_045287305.1	Streptomyces sp. NBC_00853	Streptomyces	sp.	OK	Complete Genome	99.2883	0.663729	8982810	7977575	71.3	3	HQ	PRJNA747871	SAMN24016291
GCF_045206215.1	Streptomyces zaomyceticus	Streptomyces	zaomyceticus	OK	Complete Genome	99.4635	0.19671	9699593	9329782	71.6	3	HQ	PRJNA747871	SAMN30552926
GCF_045206225.1	Streptomyces virginiae	Streptomyces	virginiae	Inconclusive	Complete Genome	99.6441	1.77089	8929724	8777021	71.7	4	HQ	PRJNA747871	SAMN30552928
GCF_045161865.1	Streptomyces sp. NBC_00859	Streptomyces	sp.	OK	Complete Genome	100	1.57177	8015150	8001606	70	2	HQ	PRJNA747871	SAMN24016292
GCF_045206245.1	Streptomyces canus	Streptomyces	canus	Inconclusive	Complete Genome	99.8927	1.07296	10493490	10322281	70.3	2	HQ	PRJNA747871	SAMN30552930
GCF_045161895.1	Streptomyces sp. NBC_00868	Streptomyces	sp.	OK	Complete Genome	99.5552	1.19754	9531298	8951979	71.3	3	HQ	PRJNA747871	SAMN24016294
GCF_045161915.1	Streptomyces sp. NBC_00872	Streptomyces	sp.	OK	Complete Genome	100	0.771056	9064491	8966801	70.3	2	HQ	PRJNA747871	SAMN24016297
GCF_045206285.1	Streptomyces sp.	Streptomyces	sp.	OK	Complete Genome	99.6441	1.39524	9534487	8859713	71.6	5	HQ	PRJNA747871	SAMN30552938
GCF_045162125.1	Streptomyces sp. NBC_00932	Streptomyces	sp.	OK	Complete Genome	99.7034	3.91459	8477959	8477959	70.2	1	HQ	PRJNA747871	SAMN24016302
GCF_045162215.1	Streptomyces sp. NBC_00963	Streptomyces	sp.	OK	Complete Genome	99.7034	4.27046	8580158	8299271	70.2	2	HQ	PRJNA747871	SAMN24016314
GCF_045162475.1	Streptomyces sp. NBC_00984	Streptomyces	sp.	OK	Complete Genome	100	1.36418	9964306	8863243	70.3	3	HQ	PRJNA747871	SAMN24016319
GCF_045206335.1	Streptomyces nigra	Streptomyces	nigra	OK	Complete Genome	100	0.357654	7750322	7750322	71.9	1	HQ	PRJNA747871	SAMN30552953
GCF_045162565.1	Streptomyces sp. NBC_00986	Streptomyces	sp.	OK	Complete Genome	99.1416	0.729614	11750813	11750813	70	1	HQ	PRJNA747871	SAMN24016321
GCF_045162615.1	Streptomyces sp. NBC_00987	Streptomyces	sp.	OK	Complete Genome	100	2.20443	10297410	9694777	70.5	2	HQ	PRJNA747871	SAMN24016322
GCF_045162645.1	Streptomyces sp. NBC_00988	Streptomyces	sp.	OK	Complete Genome	99.7854	1.30186	12375414	12375414	69.9	1	HQ	PRJNA747871	SAMN24016323
GCF_045162655.1	Streptomyces sp. NBC_00989	Streptomyces	sp.	OK	Complete Genome	100	1.8598	12214516	11950319	70.1	2	HQ	PRJNA747871	SAMN24016324
GCF_045206395.1	Streptomyces anulatus	Streptomyces	anulatus	OK	Complete Genome	99.911	0	8962202	8832045	71.3	2	HQ	PRJNA747871	SAMN30553106
GCF_045206405.1	Streptomyces europaeiscabiei	Streptomyces	europaeiscabiei	Inconclusive	Complete Genome	100	0.56867	10588014	10588014	70.5	1	HQ	PRJNA747871	SAMN30553112
GCF_045162675.1	Streptomyces sp. NBC_00996	Streptomyces	sp.	OK	Complete Genome	99.8927	2.2711	10750390	10750390	69.8	1	HQ	PRJNA747871	SAMN24016331
GCF_045206515.1	Streptomyces jietaisiensis	Streptomyces	jietaisiensis	OK	Complete Genome	100	0	7528880	7528880	72.7	1	HQ	PRJNA747871	SAMN30553152
GCF_045162695.1	Streptomyces sp. NBC_01003	Streptomyces	sp.	OK	Complete Genome	99.8927	1.77039	10538690	10319649	70.2	2	HQ	PRJNA747871	SAMN24016336
GCF_045162715.1	Streptomyces sp. NBC_01005	Streptomyces	sp.	OK	Complete Genome	100	1.97848	10117067	9433372	70.5	4	HQ	PRJNA747871	SAMN24016338
GCF_045162725.1	Streptomyces sp. NBC_01006	Streptomyces	sp.	OK	Complete Genome	99.911	2.21714	9390360	8687168	71.5	3	HQ	PRJNA747871	SAMN24016339
GCF_045206945.1	Streptomyces canus	Streptomyces	canus	OK	Complete Genome	100	1.07296	11508214	11508214	70	1	HQ	PRJNA747871	SAMN30553159
GCF_045207015.1	Streptomyces canus	Streptomyces	canus	OK	Complete Genome	100	0.658083	10840237	10700624	70.2	2	HQ	PRJNA747871	SAMN30553160
GCF_045207065.1	Streptomyces canus	Streptomyces	canus	OK	Complete Genome	99.5708	1.07296	10733048	10733048	70.2	1	HQ	PRJNA747871	SAMN30553161
GCF_045207135.1	Streptomyces canus	Streptomyces	canus	OK	Complete Genome	100	1.28755	11240151	11240151	70.1	1	HQ	PRJNA747871	SAMN30553162
GCF_045207185.1	Streptomyces halstedii	Streptomyces	halstedii	OK	Complete Genome	100	1.16929	7849026	7458198	71.9	2	HQ	PRJNA747871	SAMN30553165
GCF_045162755.1	Streptomyces sp. NBC_01012	Streptomyces	sp.	OK	Complete Genome	100	0.88968	7856715	7722973	70.5	2	HQ	PRJNA747871	SAMN24016342
GCF_045162765.1	Streptomyces sp. NBC_01013	Streptomyces	sp.	OK	Complete Genome	100	0.830368	8453265	8453265	70.5	1	HQ	PRJNA747871	SAMN24016343
GCF_045162775.1	Streptomyces sp. NBC_01014	Streptomyces	sp.	OK	Complete Genome	99.7924	1.51017	7989472	7838624	70.1	2	HQ	PRJNA747871	SAMN24016344
GCF_045162795.1	Streptomyces sp. NBC_01017	Streptomyces	sp.	OK	Complete Genome	100	1.799	11375640	11375640	69.9	1	HQ	PRJNA747871	SAMN24016347
GCF_045162815.1	Streptomyces sp. NBC_01020	Streptomyces	sp.	OK	Complete Genome	99.7034	4.15184	8361885	8361885	70.2	1	HQ	PRJNA747871	SAMN24016349
GCF_045162835.1	Streptomyces sp. NBC_01023	Streptomyces	sp.	OK	Complete Genome	99.7628	2.84698	8552865	8218161	70.2	3	HQ	PRJNA747871	SAMN24016352
GCF_045162855.1	Streptomyces sp. NBC_01077	Streptomyces	sp.	OK	Complete Genome	99.8927	3.3083	10031225	10031225	70.8	1	HQ	PRJNA747871	SAMN24016380
GCF_045207315.1	Kitasatospora purpeofusca	Kitasatospora	purpeofusca	OK	Complete Genome	100	5.17544	9074194	9074194	73.3	1	HQ	PRJNA747871	SAMN30553258
GCF_045162975.1	Streptomyces sp. NBC_01089	Streptomyces	sp.	OK	Complete Genome	99.8814	2.46145	8277755	8277755	70.7	1	HQ	PRJNA747871	SAMN24016383
GCF_045207345.1	Streptomyces chartreusis	Streptomyces	chartreusis	OK	Complete Genome	100	1.07296	11175329	9210269	70.5	5	HQ	PRJNA747871	SAMN30553262
GCF_045207355.1	Streptomyces phaeochromogenes	Streptomyces	phaeochromogenes	OK	Complete Genome	99.8927	0.572246	11885673	11885673	70.1	1	HQ	PRJNA747871	SAMN30553264
GCF_045039535.1	Streptomyces sp. NBC_01092	Streptomyces	sp.	OK	Complete Genome	100	0.9299	11096016	11096016	70.5	1	HQ	PRJNA747871	SAMN24016384
GCF_045039545.1	Streptomyces sp. NBC_01102	Streptomyces	sp.	OK	Complete Genome	100	1.33452	8638601	8399153	70.7	5	HQ	PRJNA747871	SAMN24016385
GCF_045207395.1	Streptomyces chartreusis	Streptomyces	chartreusis	OK	Complete Genome	100	1.64521	11132879	10071390	70.5	4	HQ	PRJNA747871	SAMN30553269
GCF_045207405.1	Streptomyces canus	Streptomyces	canus	Inconclusive	Complete Genome	99.8927	1.21602	10650143	10632801	70.2	2	HQ	PRJNA747871	SAMN30553270
GCF_045039565.1	Streptomyces sp. NBC_01104	Streptomyces	sp.	OK	Complete Genome	100	0.474496	9073094	9073094	71.3	1	HQ	PRJNA747871	SAMN24016387
GCF_045276905.1	Streptomyces sp. NBC_01108	Streptomyces	sp.	OK	Complete Genome	99.8221	0.751285	8696121	8594558	69.8	2	HQ	PRJNA747871	SAMN24016389
GCF_045039645.1	Streptomyces sp. NBC_01124	Streptomyces	sp.	OK	Complete Genome	100	0	8295141	8295141	72	1	HQ	PRJNA747871	SAMN24016392
GCF_045039715.1	Streptomyces sp. NBC_01136	Streptomyces	sp.	OK	Complete Genome	100	0.801144	11385859	10210006	70	6	HQ	PRJNA747871	SAMN24016396
GCF_045039765.1	Streptomyces sp. NBC_01166	Streptomyces	sp.	OK	Complete Genome	100	0.771056	9133556	8761985	70.5	3	HQ	PRJNA747871	SAMN24016401
GCF_045039775.1	Streptomyces sp. NBC_01167	Streptomyces	sp.	OK	Complete Genome	99.911	1.06762	8297195	8297195	70.5	1	HQ	PRJNA747871	SAMN24016402
GCF_045039805.1	Streptomyces sp. NBC_01171	Streptomyces	sp.	OK	Complete Genome	100	0.643777	6584968	6584968	71.6	1	HQ	PRJNA747871	SAMN24016405
GCF_045039815.1	Streptomyces sp. NBC_01174	Streptomyces	sp.	OK	Complete Genome	99.911	0.533808	9007485	8570581	71.1	4	HQ	PRJNA747871	SAMN24016406
GCF_045207925.1	Streptomyces platensis	Streptomyces	platensis	OK	Complete Genome	100	0.652432	8540072	8474648	71.1	2	HQ	PRJNA747871	SAMN30553291
GCF_045039825.1	Streptomyces sp. NBC_01176	Streptomyces	sp.	OK	Complete Genome	100	1.78827	10614154	10111754	71.1	2	HQ	PRJNA747871	SAMN24016408
GCF_045208065.1	Streptomyces anulatus	Streptomyces	anulatus	OK	Complete Genome	99.911	0	8926075	8573618	71.4	5	HQ	PRJNA747871	SAMN30553296
GCF_045208155.1	Streptomyces niveus	Streptomyces	niveus	OK	Complete Genome	99.911	0.901542	8715066	8715066	70.7	1	HQ	PRJNA747871	SAMN30553306
GCF_045208205.1	Streptomyces anulatus	Streptomyces	anulatus	OK	Complete Genome	99.911	0	8974656	8654258	71.6	2	HQ	PRJNA747871	SAMN30553307
GCF_045039835.1	Streptomyces sp. NBC_01178	Streptomyces	sp.	OK	Complete Genome	100	0.241484	6968086	6801306	72.7	3	HQ	PRJNA747871	SAMN24016410
GCF_045208325.1	Streptomyces atratus	Streptomyces	atratus	Inconclusive	Complete Genome	99.6441	1.89798	8519894	7488376	70.5	3	HQ	PRJNA747871	SAMN30553309
GCF_045039845.1	Streptomyces sp. NBC_01180	Streptomyces	sp.	OK	Complete Genome	99.8814	2.04626	7662149	7662149	70.1	1	HQ	PRJNA747871	SAMN24016411
GCF_045039875.1	Streptomyces sp. NBC_01185	Streptomyces	sp.	OK	Complete Genome	100	0.59312	8411192	8411192	71.3	1	HQ	PRJNA747871	SAMN24016414
GCF_045039885.1	Streptomyces sp. NBC_01187	Streptomyces	sp.	OK	Complete Genome	99.8399	2.13523	9461828	8912834	71	3	HQ	PRJNA747871	SAMN24016416
GCF_045208385.1	Kitasatospora papulosa	Streptomyces	papulosa	OK	Complete Genome	99.911	0.088968	7766079	7766079	71	1	HQ	PRJNA747871	SAMN30553316
GCF_045208395.1	Kitasatospora purpeofusca	Kitasatospora	purpeofusca	OK	Complete Genome	100	5.17544	8988467	8988467	73.3	1	HQ	PRJNA747871	SAMN30553318
GCF_045208405.1	Streptomyces anulatus	Streptomyces	anulatus	OK	Complete Genome	99.911	0	8425047	8425047	71.5	1	HQ	PRJNA747871	SAMN30553319
GCF_045039895.1	Streptomyces sp. NBC_01190	Streptomyces	sp.	OK	Complete Genome	99.4737	1.57895	8150292	8150292	71.7	1	HQ	PRJNA747871	SAMN24016418
GCF_036010485.1	Streptomyces sp. NBC_01198	Streptomyces	sp.	Inconclusive	Complete Genome	99.4737	1.57895	7916046	7916046	72.1	1	HQ	PRJNA747871	SAMN24016424
GCF_045208435.1	Kitasatospora papulosa	Streptomyces	papulosa	OK	Complete Genome	99.911	0.088968	7695399	7606679	71	2	HQ	PRJNA747871	SAMN30553324
GCF_036226365.1	Streptomyces sp. NBC_01262	Streptomyces	sp.	Inconclusive	Complete Genome	100	1.22807	9736065	9736065	70.7	1	HQ	PRJNA747871	SAMN24016471
GCF_045208455.1	Streptomyces anulatus	Streptomyces	anulatus	OK	Complete Genome	99.911	0.177936	8949807	8676995	71.7	2	HQ	PRJNA747871	SAMN30553328
GCF_045039935.1	Streptomyces sp. NBC_01367	Streptomyces	sp.	OK	Complete Genome	99.6441	2.49252	10119162	10119162	71.4	1	HQ	PRJNA747871	SAMN24016546
GCF_045039955.1	Streptomyces sp. NBC_01369	Streptomyces	sp.	OK	Complete Genome	100	1.84856	10678102	9584063	70.4	5	HQ	PRJNA747871	SAMN24016547
GCF_045208495.1	Streptomyces anulatus	Streptomyces	anulatus	OK	Complete Genome	99.911	0	8788818	8627699	71.7	2	HQ	PRJNA747871	SAMN30553332
GCF_045208505.1	Streptomyces decoyicus	Streptomyces	decoyicus	OK	Complete Genome	100	1.49123	9226293	9132955	70.9	2	HQ	PRJNA747871	SAMN30553333
GCF_045208515.1	Streptomyces decoyicus	Streptomyces	decoyicus	OK	Complete Genome	100	1.57895	9436709	9436709	70.7	1	HQ	PRJNA747871	SAMN30553335
GCF_045040015.1	Streptomyces sp. NBC_01378	Streptomyces	sp.	OK	Complete Genome	100	1.77039	10541167	10541167	70.2	1	HQ	PRJNA747871	SAMN24016553
GCF_045040025.1	Streptomyces sp. NBC_01383	Streptomyces	sp.	OK	Complete Genome	99.911	0.919336	9076161	8882248	70.5	4	HQ	PRJNA747871	SAMN24016556
GCF_045040035.1	Streptomyces sp. NBC_01384	Streptomyces	sp.	OK	Complete Genome	100	0.801144	11543172	10362366	70	2	HQ	PRJNA747871	SAMN24016557
GCF_045208555.1	Streptomyces microflavus	Streptomyces	microflavus	OK	Complete Genome	99.911	0.279614	8172558	8030651	71.4	2	HQ	PRJNA747871	SAMN30553341
GCF_045040045.1	Streptomyces sp. NBC_01386	Streptomyces	sp.	OK	Complete Genome	99.5708	2.41416	11327439	11327439	70	1	HQ	PRJNA747871	SAMN24016558
GCF_045208695.1	Streptomyces anulatus	Streptomyces	anulatus	OK	Complete Genome	99.911	0	8833825	8530688	71.4	2	HQ	PRJNA747871	SAMN30553343
GCF_045040055.1	Streptomyces sp. NBC_01387	Streptomyces	sp.	OK	Complete Genome	99.7924	1.4828	8086610	7936992	70.1	2	HQ	PRJNA747871	SAMN24016559
GCF_045040105.1	Streptomyces sp. NBC_01390	Streptomyces	sp.	OK	Complete Genome	99.7496	2.36052	11308271	11308271	69.8	1	HQ	PRJNA747871	SAMN24016562
GCF_045208885.1	Streptomyces cyaneofuscatus	Streptomyces	cyaneofuscatus	Inconclusive	Complete Genome	99.911	0.635486	8460238	8203642	71.5	3	HQ	PRJNA747871	SAMN30553348
GCF_045209025.1	Micromonospora globbae	Micromonospora	globbae	OK	Complete Genome	100	1.84211	6840086	6840086	73.4	1	HQ	PRJNA747871	SAMN30553350
GCF_045209055.1	Micromonospora zamorensis	Micromonospora	zamorensis	OK	Complete Genome	100	0.789474	7095279	7095279	71.2	1	HQ	PRJNA747871	SAMN30553351
GCF_045040135.1	Streptomyces sp. NBC_01396	Streptomyces	sp.	OK	Complete Genome	99.8927	0.429185	10133960	10133960	70.3	1	HQ	PRJNA747871	SAMN24016566
GCF_045040195.1	Streptomyces sp. NBC_01410	Streptomyces	sp.	OK	Complete Genome	100	1.74377	8339859	8339859	69.8	1	HQ	PRJNA747871	SAMN24016573
GCF_045040205.1	Streptomyces sp. NBC_01411	Streptomyces	sp.	OK	Complete Genome	99.7034	4.11625	8601356	8601356	70.2	1	HQ	PRJNA747871	SAMN24016574
GCF_045040265.1	Streptomyces sp. NBC_01420	Streptomyces	sp.	OK	Complete Genome	100	1.51246	7870382	7664997	71.8	2	HQ	PRJNA747871	SAMN24016581
GCF_045040295.1	Streptomyces sp. NBC_01506	Streptomyces	sp.	OK	Complete Genome	99.1993	1.36418	8811585	8756932	70.4	3	HQ	PRJNA747871	SAMN24016631
GCF_045040315.1	Streptomyces sp. NBC_01508	Streptomyces	sp.	OK	Complete Genome	99.5552	1.60142	8094089	8023512	70.6	2	HQ	PRJNA747871	SAMN24016633
GCF_045209585.1	Streptomyces albidoflavus	Streptomyces	albidoflavus	OK	Complete Genome	99.8927	0.572246	7230796	7076013	73.3	2	HQ	PRJNA747871	SAMN30553361
GCF_045040335.1	Streptomyces sp. NBC_01511	Streptomyces	sp.	OK	Complete Genome	99.5552	1.24555	8103498	8103498	70.6	1	HQ	PRJNA747871	SAMN24016635
GCF_045209665.1	Streptomyces uncialis	Streptomyces	uncialis	Inconclusive	Complete Genome	99.8927	0.768956	8924390	8815475	72.1	3	HQ	PRJNA747871	SAMN30553364
GCF_045209675.1	Streptomyces anulatus	Streptomyces	anulatus	OK	Complete Genome	99.911	0.604982	9108639	8927841	71.4	3	HQ	PRJNA747871	SAMN30553365
GCF_045209685.1	Streptomyces albidoflavus	Streptomyces	albidoflavus	OK	Complete Genome	99.8927	0.786838	7194845	7022896	73.3	2	HQ	PRJNA747871	SAMN30553367
GCF_045209695.1	Streptomyces thermoviolaceus	Streptomyces	thermoviolaceus	OK	Complete Genome	99.5708	0.321888	6066002	6066002	72.5	1	HQ	PRJNA747871	SAMN30553368
GCF_045209705.1	Streptomyces griseus	Streptomyces	griseus	OK	Complete Genome	99.911	1.06762	8315763	8315763	71.6	1	HQ	PRJNA747871	SAMN30553369
GCF_045040345.1	Streptomyces sp. NBC_01515	Streptomyces	sp.	OK	Complete Genome	99.5708	0.715308	11325605	11325605	70	1	HQ	PRJNA747871	SAMN24016636
GCF_045209725.1	Streptomyces anthocyanicus	Streptomyces	anthocyanicus	OK	Complete Genome	100	0.214592	9065605	8678397	72	2	HQ	PRJNA747871	SAMN30553372
GCF_045040375.1	Streptomyces sp. NBC_01520	Streptomyces	sp.	OK	Complete Genome	100	1.06762	8261305	8075076	70.7	3	HQ	PRJNA747871	SAMN24016640
GCF_045040405.1	Streptomyces sp. NBC_01525	Streptomyces	sp.	OK	Complete Genome	99.5552	1.60142	7312695	7096799	72.1	3	HQ	PRJNA747871	SAMN24016643
GCF_045209775.1	Streptomyces anulatus	Streptomyces	anulatus	OK	Complete Genome	99.911	0	9089215	8852245	71.3	2	HQ	PRJNA747871	SAMN30553377
GCF_045040415.1	Streptomyces sp. NBC_01527	Streptomyces	sp.	OK	Complete Genome	100	1.72005	10196843	9298856	69.4	2	HQ	PRJNA747871	SAMN24016644
GCF_045209795.1	Streptomyces hirsutus	Streptomyces	hirsutus	OK	Complete Genome	100	0.965665	9016521	8833381	71.1	2	HQ	PRJNA747871	SAMN30553380
GCF_045209825.1	Streptomyces anulatus	Streptomyces	anulatus	OK	Complete Genome	99.911	0.177936	9019003	8788890	71.7	2	HQ	PRJNA747871	SAMN30553383
GCF_045210015.1	Streptomyces anulatus	Streptomyces	anulatus	OK	Complete Genome	99.911	0.177936	9097611	8739815	71.6	2	HQ	PRJNA747871	SAMN30553386
GCF_045210185.1	Streptomyces albidoflavus	Streptomyces	albidoflavus	OK	Complete Genome	99.8927	0.786838	7307846	7135774	73.2	2	HQ	PRJNA747871	SAMN30553390
GCF_045040425.1	Streptomyces sp. NBC_01530	Streptomyces	sp.	OK	Complete Genome	99.8927	0.429185	9331707	9331707	70.1	1	HQ	PRJNA747871	SAMN24016645
GCF_045276945.1	Streptomyces anthocyanicus	Streptomyces	anthocyanicus	OK	Complete Genome	100	0.143062	8651515	8651515	72.1	1	HQ	PRJNA747871	SAMN30553391
GCF_045276955.1	Streptomyces albidoflavus	Streptomyces	albidoflavus	OK	Complete Genome	99.8927	0.572246	7288753	7142386	73.3	3	HQ	PRJNA747871	SAMN30553393
GCF_045276965.1	Streptomyces althioticus	Streptomyces	althioticus	OK	Complete Genome	100	0	7542023	7542023	72.6	1	HQ	PRJNA747871	SAMN30553394
GCF_045276985.1	Streptomyces albidoflavus	Streptomyces	albidoflavus	OK	Complete Genome	99.8927	0	7316471	6877750	73.3	2	HQ	PRJNA747871	SAMN30553399
GCF_045276995.1	Streptomyces althioticus	Streptomyces	althioticus	OK	Complete Genome	100	0.429185	7754059	7754059	72.4	1	HQ	PRJNA747871	SAMN30553400
GCF_045277005.1	Streptomyces albidoflavus	Streptomyces	albidoflavus	OK	Complete Genome	99.8927	0.143062	7099099	7099099	73.4	1	HQ	PRJNA747871	SAMN30553401
GCF_045277015.1	Streptomyces albidoflavus	Streptomyces	albidoflavus	OK	Complete Genome	99.8927	0.572246	7203715	7062573	73.3	2	HQ	PRJNA747871	SAMN30553402
GCF_045277055.1	Streptomyces althioticus	Streptomyces	althioticus	OK	Complete Genome	100	0.858369	7942713	7730518	72.3	5	HQ	PRJNA747871	SAMN30553406
GCF_045286965.1	Streptomyces atratus	Streptomyces	atratus	Inconclusive	Complete Genome	99.6441	1.98695	8740525	7598416	70.4	5	HQ	PRJNA747871	SAMN24016152
GCF_045040445.1	Streptomyces sp. NBC_01537	Streptomyces	sp.	Inconclusive	Complete Genome	100	1	9903391	9903391	70.6	1	HQ	PRJNA747871	SAMN24016647
GCF_045040495.1	Streptomyces sp. NBC_01538	Streptomyces	sp.	OK	Complete Genome	99.8927	1.35908	10306119	10306119	69.9	1	HQ	PRJNA747871	SAMN24016648
GCF_049489975.1	Streptomyces albidoflavus	Streptomyces	albidoflavus	OK	Complete Genome	99.4635	0.786838	7304642	7037835	73.3	4	HQ	PRJNA747871	SAMN30553392
GCF_900089585.1	Micromonospora sediminicola	Micromonospora	sediminicola	OK	Contig	97.87	2.23	6885700	4643122	73.5	5	MQ	PRJEB14335	SAMN04488363
GCF_900090105.1	Micromonospora humi	Micromonospora	humi	OK	Scaffold	97.03	3.1	6662588	306145	73.5	40	MQ	PRJEB14439	SAMN04488015
GCF_900090255.1	Micromonospora aurantiaca	Micromonospora	aurantiaca	OK	Contig	99.3	2.05	7372718	7245320	73	4	MQ	PRJEB14465	SAMN04488386
GCF_900090265.1	Micromonospora rifamycinica	Micromonospora	rifamycinica	OK	Chromosome	95.4	4.28	7011369	7011269	73	1	HQ	PRJEB14468	SAMN04488251
GCF_900090275.1	Micromonospora zamorensis	Micromonospora	zamorensis	OK	Chromosome	97.91	4.28	7096032	7095932	71	1	HQ	PRJEB14469	SAMN04488385
GCF_900090295.1	Micromonospora coxensis	Micromonospora	coxensis	OK	Chromosome	96.45	4.27	6769793	6769693	73.5	1	HQ	PRJEB14466	SAMN04488465
GCF_900090315.1	Micromonospora citrea	Micromonospora	citrea	OK	Contig	95.88	4.71	7208999	7145280	74	2	MQ	PRJEB14462	SAMN04488296
GCF_900091505.1	Micromonospora chokoriensis	Micromonospora	chokoriensis	OK	Chromosome	96.13	3.26	6897819	6897719	71.5	1	HQ	PRJEB14508	SAMN04488390
GCF_900091515.1	Micromonospora purpureochromogenes	Micromonospora	purpureochromogenes	OK	Chromosome	95.22	3.31	6674234	6674134	73	1	HQ	PRJEB14513	SAMN04489819
GCF_900091555.1	Micromonospora mirobrigensis	Micromonospora	mirobrigensis	OK	Scaffold	96.6	3.71	6168719	710029	73.5	23	MQ	PRJEB14521	SAMN04488520
GCF_900091575.1	Micromonospora saelicesensis	Micromonospora	saelicesensis	OK	Scaffold	98.22	3.88	7103993	660392	71	16	MQ	PRJEB14522	SAMN04488521
GCF_900091585.1	Micromonospora nigra	Micromonospora	nigra	OK	Contig	93.76	4.68	6363764	6210650	72.5	3	MQ	PRJEB14525	SAMN04488480
GCF_900091605.1	Micromonospora tulbaghiae	Micromonospora	tulbaghiae	OK	Scaffold	99.05	1.06	6488171	431781	73	25	MQ	PRJEB14524	SAMN04488088
GCF_900101565.1	Rhodococcus erythropolis	Rhodococcus	erythropolis	OK	Scaffold	94.79	1.02	6258066	274756	62.5	47	MQ	PRJEB15716	SAMN02799641
GCF_900101685.1	Actinokineospora iranica	Actinokineospora	iranica	OK	Scaffold	99.5	0.33	6578763	291113	71	44	MQ	PRJEB15760	SAMN05216174
GCF_900104935.1	Streptomyces sp. 2114.2	Streptomyces	sp.	OK	Chromosome	100	0	8620263	8620163	72	1	HQ	PRJEB16387	SAMN05428941
GCF_900105905.1	Rhodococcus koreensis	Rhodococcus	koreensis	OK	Contig	99.52	4.95	10311574	9057810	67.5	9	MQ	PRJEB16386	SAMN04490239
GCF_900108315.1	Saccharopolyspora kobensis	Saccharopolyspora	kobensis	OK	Scaffold	100	2.65	7744048	469672	71	33	MQ	PRJEB16689	SAMN02982929
GCF_900111175.1	Actinokineospora terrae	Actinokineospora	terrae	OK	Scaffold	100	1.08	7588185	383933	71	41	MQ	PRJEB17020	SAMN04487818
GCF_900115345.1	Amycolatopsis rubida	Amycolatopsis	rubida	OK	Contig	98.9	3.06	9873592	540869	70	45	MQ	PRJEB17174	SAMN05421854
GCF_900116135.1	Saccharopolyspora flava	Saccharopolyspora	flava	OK	Scaffold	100	1	6291299	453928	71	24	MQ	PRJEB17530	SAMN05660874
GCF_900119165.1	Amycolatopsis australiensis	Amycolatopsis	australiensis	OK	Contig	99.06	1.19	9312140	9115762	72	10	MQ	PRJEB17763	SAMN04489730
GCF_900129855.1	Streptomyces sp. 3214.6	Streptomyces	sp.	OK	Chromosome	100	1.33	9375551	9375451	70.5	1	HQ	PRJEB18237	SAMN05444521
GCF_900142365.1	Pseudonocardia thermophila	Pseudonocardia	thermophila	OK	Contig	93.73	3.66	6098214	208403	73	47	MQ	PRJEB18346	SAMN05443637
GCF_900215415.1	Nocardia amikacinitolerans	Nocardia	amikacinitolerans	OK	Scaffold	99.39	3.07	7379133	635172	68.5	19	MQ	PRJEB22434	SAMN04244553
GCF_900221035.1	Streptomyces sp. 2323.1	Streptomyces	sp.	OK	Chromosome	99.91	1.36	8212455	8212355	71	1	HQ	PRJEB22324	SAMN06272775
GCF_900454305.1	Nocardia otitidiscaviarum	Nocardia	otitidiscaviarum	OK	Contig	97.38	4.04	7536042	5133750	69	8	MQ	PRJEB6403	SAMEA103980426
GCF_900455725.1	Rhodococcus gordoniae	Rhodococcus	gordoniae	OK	Contig	98.86	0.33	4871915	4524654	68	3	MQ	PRJEB6403	SAMEA4412658
GCF_900455745.1	Nocardia farcinica	Nocardia	farcinica	OK	Contig	99.87	3	6513136	6454045	70.5	2	MQ	PRJEB6403	SAMEA87355168
GCF_900683605.1	Nocardia farcinica	Nocardia	farcinica	OK	Contig	99.66	2.37	6140857	6020576	71	7	MQ	PRJEB6403	SAMEA101172418
GCF_900683635.1	Nocardia cyriacigeorgica	Nocardia	cyriacigeorgica	OK	Complete Genome	99.43	1.89	6476621	6476621	68	1	HQ	PRJEB6403	SAMEA103899858
GCF_904440635.1	Streptomyces sp. KY70	Streptomyces	sp.	OK	Complete Genome	98.86	0.49	7838151	7838151	71.5	1	HQ	PRJEB40385	SAMEA7321367
GCF_910591545.1	Rhodococcus opacus	Rhodococcus	opacus	OK	Contig	99.5	3.59	8951454	6484583	67	38	MQ	PRJEB45460	SAMEA9114841
GCF_937770285.1	Rhodococcus erythropolis	Rhodococcus	erythropolis	OK	Contig	92.44	1.64	6218053	653813	62.5	20	MQ	PRJEB52171	SAMEA14028493
GCF_937864515.1	uncultured Rhodococcus sp.	Rhodococcus	Rhodococcus	OK	Contig	99.41	0	6822128	377670	62.5	50	MQ	PRJEB51074	SAMEA14036296
GCF_947311705.1	Streptomyces albidoflavus	Streptomyces	albidoflavus	OK	Complete Genome	97.57	0.19	7136301	7047941	73.5	3	HQ	PRJEB49330	SAMEA11595147
GCF_948472415.1	Kitasatospora fiedleri	Kitasatospora	fiedleri	OK	Complete Genome	94.35	1.96	8073621	7913726	74	3	HQ	PRJEB56865	SAMEA112362601
GCF_964272335.1	Streptomyces sp. SudanB5_2050	Streptomyces	sp.	OK	Complete Genome	99.53	0.05	7956620	7874837	72.5	2	HQ	PRJEB59914	SAMEA112831330
GCF_964272455.1	Streptomyces sp. SudanB91_2054	Streptomyces	sp.	OK	Complete Genome	99.57	0.05	8209606	7993102	72.5	3	HQ	PRJEB59914	SAMEA112831334
GCF_964272505.1	Streptomyces sp. SudanB135_2055	Streptomyces	sp.	OK	Complete Genome	99.62	0	8082065	7919821	72.5	2	HQ	PRJEB59914	SAMEA112831335
NBC_00003	Streptomyces sp. NBC_00003	Streptomyces	sp.	OK	Contig	100	0.500715	8708067	8698839	70.5	3	HQ	PRJNA747871	SAMN24016139
NBC_00008	Streptomyces sp. NBC_00008	Streptomyces	sp.	OK	Contig	100	0.355872	8678696	8550141	70.8	3	HQ	PRJNA747871	SAMN24016141
NBC_00027	Streptomyces melanogenes	Streptomyces	melanogenes	OK	Contig	100	2.25386	8457029	8316562	71.5	3	HQ	PRJNA747871	SAMN24016145
NBC_00041	Streptomyces atratus	Streptomyces	atratus	OK	Contig	99.6441	2.25386	8663040	7651476	70.5	4	HQ	PRJNA747871	SAMN30552878
NBC_00049	Streptomyces sp. NBC_00049	Streptomyces	sp.	OK	Contig	99.6441	0.762583	8162174	8155131	72	2	HQ	PRJNA747871	SAMN24016154
NBC_00077	Streptomyces exfoliatus	Streptomyces	exfoliatus	OK	Contig	99.8927	0.715308	8099927	7891435	71.8	4	HQ	PRJNA747871	SAMN24016155
NBC_00093	Streptomyces sp. NBC 00093	Streptomyces	sp.	OK	Contig	100	2.7897	11614920	11591043	70.2	2	HQ	PRJNA747871	SAMN30552909
NBC_00106	Kitasatospora indigofera	Kitasatospora	indigofera	OK	Complete Genome	99.4737	0.701754	10478844	10282202	73.5	5	HQ	PRJNA747871	SAMN24016163
NBC_00119	Streptomyces sp. NBC 00119	Streptomyces	sp.	OK	Contig	99.5708	2.19957	10976689	10962160	70	3	HQ	PRJNA747871	SAMN30552923
NBC_00131	Streptomyces virginiae	Streptomyces	virginiae	OK	Contig	100	0.643959	8915614	8691171	71.7	5	HQ	PRJNA747871	SAMN24016165
NBC_00148	Streptomyces sp. NBC_00148	Streptomyces	sp.	OK	Contig	100	0.355872	8229620	8163685	71.5	3	HQ	PRJNA747871	SAMN24016169
NBC_00164	Streptomyces virginiae	Streptomyces	virginiae	OK	Contig	99.6441	1.90928	9194696	9183674	71.5	2	HQ	PRJNA747871	SAMN24016174
NBC_00165	Streptomyces glauciniger	Streptomyces	glauciniger	OK	Complete Genome	100	2.84211	9542804	9542804	72.2	1	HQ	PRJNA747871	SAMN24016175
NBC_00180	Streptomyces sp. NBC_00180	Streptomyces	sp.	OK	Contig	100	0.429185	10015531	10011928	70.2	2	HQ	PRJNA747871	SAMN24016180
NBC_00187	Streptomyces phaeochromogenes	Streptomyces	phaeochromogenes	OK	Complete Genome	99.8927	0.858369	10187121	10187121	70.2	1	HQ	PRJNA747871	SAMN30552945
NBC_00217	Streptomyces achromogenes	Streptomyces	achromogenes	OK	Complete Genome	100	15.8798	10371570	10371570	72.4	1	HQ	PRJNA747871	SAMN24016191
NBC_00221	Streptomyces phaeochromogenes	Streptomyces	phaeochromogenes	OK	Complete Genome	99.8927	0.858369	11224598	11224598	70.2	1	HQ	PRJNA747871	SAMN30552958
NBC_00238	Streptomyces gancidicus	Streptomyces	gancidicus	OK	Complete Genome	100	0	7518633	7518633	72.6	1	HQ	PRJNA747871	SAMN24016197
NBC_00295	Micromonospora chokoriensis	Micromonospora	chokoriensis	OK	Complete Genome	100	0.789474	7267395	7267395	71.1	1	HQ	PRJNA747871	SAMN30552995
NBC_00433	Streptomyces sp. NBC 00433	Streptomyces	sp.	OK	Complete Genome	99.4737	1.84211	8986572	8986572	71.9	1	HQ	PRJNA747871	SAMN30553074
NBC_00510	Streptomyces sp. NBC 00510	Streptomyces	sp.	OK	Complete Genome	100	4.15789	10147553	10147553	72.1	1	HQ	PRJNA747871	SAMN30553110
NBC_00556	Streptomyces cellulosae	Streptomyces	cellulosae	OK	Complete Genome	100	0	7455748	7455748	72.2	1	HQ	PRJNA747871	SAMN24016249
NBC_00625	Streptomyces tubercidicus	Streptomyces	tubercidicus	OK	Contig	100	1.27521	8640878	8538055	70.7	4	HQ	PRJNA747871	SAMN24016259
NBC_00685	Streptomyces canus	Streptomyces	canus	OK	Complete Genome	100	0.801144	11276871	11276871	70.2	1	HQ	PRJNA747871	SAMN30553184
NBC_00830	Streptomyces sp. NBC 00830	Streptomyces	sp.	OK	Complete Genome	99.6441	1.77936	9797426	9797426	69.3	1	HQ	PRJNA747871	SAMN30553255
NBC_00836	Streptomyces antimycoticus	Streptomyces	antimycoticus	OK	Contig	100	2.01754	11514545	11272033	70.7	3	HQ	PRJNA747871	SAMN24016287
NBC_00855	Micromonospora sp. NBC 00855	Micromonospora	sp.	OK	Contig	100	4.07895	7707991	7572351	71	4	HQ	PRJNA747871	SAMN30553263
NBC_00857	Streptomyces sp. NBC 00857	Streptomyces	sp.	OK	Contig	100	1.10716	8093981	8011685	69.8	3	HQ	PRJNA747871	SAMN30553265
NBC_00871	Streptomyces canus	Streptomyces	canus	OK	Contig	99.8927	1.21602	10828530	10740985	70.2	2	HQ	PRJNA747871	SAMN30553271
NBC_00886	Streptomyces sp. NBC 00886	Streptomyces	sp.	OK	Contig	99.8569	0.143062	11025482	10994939	69.6	4	HQ	PRJNA747871	SAMN30553280
NBC_00889	Kribbella sp. NBC 00889	Kribbella	sp.	OK	Complete Genome	99.4819	4.4905	9143554	9143554	68.3	1	HQ	PRJNA747871	SAMN30553283
NBC_00899	Streptomyces sp. NBC 00899	Streptomyces	sp.	OK	Contig	99.4737	28.1579	11777151	11771747	72.1	2	HQ	PRJNA747871	SAMN30553289
NBC_00974	Streptomyces sp. NBC_00974	Streptomyces	sp.	OK	Contig	99.6441	1.37547	8618721	8608746	71.5	2	HQ	PRJNA747871	SAMN24016317
NBC_00975	Streptomyces tubercidicus	Streptomyces	tubercidicus	OK	Contig	99.911	1.27521	8767216	8628007	70.6	4	HQ	PRJNA747871	SAMN24016318
NBC_00995	Streptomyces sp. NBC_00995	Streptomyces	sp.	OK	Contig	100	0.355872	8212167	8201818	71.1	2	HQ	PRJNA747871	SAMN24016330
NBC_00998	Streptomyces sp. NBC_00998	Streptomyces	sp.	OK	Contig	100	0.288087	8696460	8190284	71.7	3	HQ	PRJNA747871	SAMN24016333
NBC_01001	Streptomyces sp. NBC_01001	Streptomyces	sp.	OK	Contig	100	1.05067	9417957	7941964	71.4	7	HQ	PRJNA747871	SAMN24016334
NBC_01007	Streptomyces sp. NBC 01007	Streptomyces	sp.	OK	Contig	100	0.912017	10849948	10669088	70.4	4	HQ	PRJNA747871	SAMN30553292
NBC_01080	Streptomyces anulatus	Streptomyces	anulatus	OK	Contig	99.911	0	9025764	8826137	71.4	3	HQ	PRJNA747871	SAMN24016382
NBC_01175	Streptomyces sp. NBC_01175	Streptomyces	sp.	OK	Contig	99.911	0	7978860	7864500	71.3	3	HQ	PRJNA747871	SAMN24016407
NBC_01177	Streptomyces sp. NBC_01177	Streptomyces	sp.	OK	Contig	99.911	0.0395413	8054536	7977991	71.2	5	HQ	PRJNA747871	SAMN24016409
NBC_01231	Streptomyces sp. NBC_01231	Streptomyces	sp.	OK	Complete Genome	100	0.584168	11338389	11338389	70.1	1	HQ	PRJNA747871	SAMN24016447
NBC_01274	Streptomyces albidoflavus	Streptomyces	albidoflavus	OK	Contig	99.8927	0.143062	7193926	7177495	73.3	3	HQ	PRJNA747871	SAMN24016482
NBC_01393	Streptomyces sp. NBC_01393	Streptomyces	sp.	OK	Contig	99.8927	1.43062	10244479	10228639	70.6	3	HQ	PRJNA747871	SAMN24016565
NBC_01397	Streptomyces sp. NBC_01397	Streptomyces	sp.	OK	Contig	99.5708	3.05794	10045558	9840777	70.4	7	HQ	PRJNA747871	SAMN24016567
NBC_01401	Streptomyces sp. NBC_01401	Streptomyces	sp.	OK	Contig	100	0.355872	8182608	8080713	70.5	3	HQ	PRJNA747871	SAMN24016568
NBC_01505	Kribbella sp. NBC_01505	Kribbella	sp.	OK	Complete Genome	100	3.62694	9918418	9918418	67.7	1	HQ	PRJNA747871	SAMN24016630
NBC_01519	Kitasatospora sp. NBC_01519	Kitasatospora	sp.	OK	Contig	99.4737	1.05263	11495479	9768063	72.9	5	HQ	PRJNA747871	SAMN24016639
NBC_01553	Streptomyces sp. NBC 01553	Streptomyces	sp.	OK	Contig	100	2.2934	9779582	9565790	70.5	5	HQ	PRJNA747871	SAMN30553317
NBC_01562	Streptomyces sp. NBC 01562	Streptomyces	sp.	OK	Contig	100	0.751073	12754826	10764263	69.8	8	HQ	PRJNA747871	SAMN30553322
NBC_01581	Streptomyces glauciniger	Streptomyces	glauciniger	OK	Complete Genome	100	2.05263	8817510	8817510	72.3	1	HQ	PRJNA747871	SAMN30553331
NBC_01592	Streptomyces sp. NBC_01592	Streptomyces	sp.	OK	Contig	99.911	2.33435	10060354	9461986	70.6	4	HQ	PRJNA747871	SAMN30553339
NBC_01600	Streptomyces phaeochromogenes	Streptomyces	phaeochromogenes	OK	Contig	99.8927	1.64521	11987569	11513258	70	3	HQ	PRJNA747871	SAMN30553344
NBC_01607	Streptomyces cellulosae	Streptomyces	cellulosae	OK	Complete Genome	100	0	7408340	7408340	72.2	1	HQ	PRJNA747871	SAMN30553349
NBC_01612	Streptomyces sp. NBC 01612	Streptomyces	sp.	OK	Contig	100	0	10196348	10169438	71.3	2	HQ	PRJNA747871	SAMN30553352
NBC_01626	Streptomyces anulatus	Streptomyces	anulatus	OK	Contig	99.911	0.177936	9102547	8813279	71.3	4	HQ	PRJNA747871	SAMN30553366
NBC_01657	Streptomyces cellulosae	Streptomyces	cellulosae	OK	Contig	100	0.143062	8208291	7754542	72	3	HQ	PRJNA747871	SAMN30553388
NBC_01658	Streptomyces albidoflavus	Streptomyces	albidoflavus	OK	Contig	99.8927	0.143062	7804688	7436451	72.9	4	HQ	PRJNA747871	SAMN30553389
NBC_01667	Streptomyces cellulosae	Streptomyces	cellulosae	OK	Complete Genome	100	0.858369	7756047	7756047	71.9	1	HQ	PRJNA747871	SAMN30553395
NBC_01668	Streptomyces anthocyanicus	Streptomyces	anthocyanicus	OK	Contig	100	0.500715	9328115	8561438	71.9	5	HQ	PRJNA747871	SAMN30553396
NBC_01676	Streptomyces cellulosae	Streptomyces	cellulosae	OK	Contig	100	0	8051568	7592827	71.9	2	HQ	PRJNA747871	SAMN30553403
NBC_01677	Streptomyces cellulosae	Streptomyces	cellulosae	OK	Contig	100	0	7362199	7266300	72.2	2	HQ	PRJNA747871	SAMN30553404
NBC_01678	Streptomyces cellulosae	Streptomyces	cellulosae	OK	Contig	100	0	7774673	7435508	72	2	HQ	PRJNA747871	SAMN30553405
NBC_01680	Streptomyces cellulosae	Streptomyces	cellulosae	OK	Contig	100	0	7582306	7462948	72	3	HQ	PRJNA747871	SAMN30553407
NBC_01694	Streptomyces glauciniger	Streptomyces	glauciniger	OK	Complete Genome	100	2.05263	8671343	8671343	72.2	1	HQ	PRJNA747871	SAMN30553418
NBC_01701	Streptomyces cellulosae	Streptomyces	cellulosae	OK	Contig	100	0	7936728	7491899	72	2	HQ	PRJNA747871	SAMN30553422
NBC_01703	Streptomyces cellulosae	Streptomyces	cellulosae	OK	Contig	100	0	8194106	7597655	72	3	HQ	PRJNA747871	SAMN30553423
NBC_01706	Streptomyces cellulosae	Streptomyces	cellulosae	OK	Complete Genome	99.7854	0	7350036	7350036	72.2	1	HQ	PRJNA747871	SAMN30553424
NBC_01744	Streptomyces sp. NBC 01744	Streptomyces	sp.	OK	Complete Genome	100	2.13523	10090444	10090444	69.4	1	HQ	PRJNA747871	SAMN30553452
NBC_01746	Streptomyces glauciniger	Streptomyces	glauciniger	OK	Contig	100	2.05263	9855591	9513205	72.1	2	HQ	PRJNA747871	SAMN30553454
NBC_01772	Streptomyces cellulosae	Streptomyces	cellulosae	OK	Complete Genome	100	0	7432268	7432268	72.2	1	HQ	PRJNA747871	SAMN30553478
NBC_01773	Streptomyces cellulosae	Streptomyces	cellulosae	OK	Complete Genome	100	0.429185	7844936	7844936	72	1	HQ	PRJNA747871	SAMN30553479
NBC_01779	Streptomyces cellulosae	Streptomyces	cellulosae	OK	Contig	100	0	7347260	7330856	72.2	2	HQ	PRJNA747871	SAMN30553484
NBC_01799	Streptomyces sp. NBC 01799	Streptomyces	sp.	OK	Contig	100	2.07592	10049894	10049894	69.4	1	HQ	PRJNA747871	SAMN30553496
