# Supplementary material for: Unraveling Rare Codon Bias in Actinomycetota: Lineage-Specific and 5’ Terminal Enrichment Across 1936 Genomes
Source: Research Square preprint supplement (doi:10.21203/rs.3.rs-7996976/v1), 2025-11-19
Supplement: Supplementary file 3 [file e6a4d5f14d6ef519fd91a674.xlsx]

## Sheet: Table S2 tRNA for TTA and AGA
Genus	Organism	GCF_ID	tRNA_AGA	tRNA_TTA
Actinokineospora	Actinokineospora alba	GCF_004362515.1	1	1
Actinokineospora	Actinokineospora baliensis	GCF_016907695.1	1	1
Actinokineospora	Actinokineospora cianjurensis	GCF_003663795.1	1	1
Actinokineospora	Actinokineospora diospyrosa	GCF_024171925.1	1	1
Actinokineospora	Actinokineospora fastidiosa	GCF_014648415.1	1	1
Actinokineospora	Actinokineospora globicatena	GCF_030268905.1	1	1
Actinokineospora	Actinokineospora globicatena	GCF_030268945.1	1	1
Actinokineospora	Actinokineospora iranica	GCF_900101685.1	1	1
Actinokineospora	Actinokineospora sp. UTMC 2448	GCF_024760565.1	1	1
Actinokineospora	Actinokineospora spheciospongiae	GCF_003182415.1	1	1
Actinokineospora	Actinokineospora terrae	GCF_900111175.1	1	1
Amycolatopsis	Amycolatopsis aidingensis	GCF_018885265.1	1	1
Amycolatopsis	Amycolatopsis alba DSM 44262	GCF_000384215.1	1	1
Amycolatopsis	Amycolatopsis arida	GCF_004365925.1	1	1
Amycolatopsis	Amycolatopsis australiensis	GCF_900119165.1	1	1
Amycolatopsis	Amycolatopsis bartoniae	GCF_014191255.1	1	1
Amycolatopsis	Amycolatopsis cihanbeyliensis	GCF_006715045.1	1	1
Amycolatopsis	Amycolatopsis echigonensis	GCF_002846615.1	1	1
Amycolatopsis	Amycolatopsis granulosa	GCF_011758745.1	1	1
Amycolatopsis	Amycolatopsis jiangsuensis	GCF_014204865.1	1	1
Amycolatopsis	Amycolatopsis keratiniphila	GCF_000400635.2	1	1
Amycolatopsis	Amycolatopsis lexingtonensis	GCF_014873755.1	1	1
Amycolatopsis	Amycolatopsis magusensis	GCF_017875555.1	1	1
Amycolatopsis	Amycolatopsis mediterranei S699	GCF_000282715.1	1	1
Amycolatopsis	Amycolatopsis methanolica 239	GCF_000371885.1	1	1
Amycolatopsis	Amycolatopsis mongoliensis	GCF_030285665.1	1	1
Amycolatopsis	Amycolatopsis nigrescens CSC17Ta-90	GCF_000384315.1	1	1
Amycolatopsis	Amycolatopsis orientalis	GCF_000943515.2	1	1
Amycolatopsis	Amycolatopsis plumensis	GCF_042652605.1	1	1
Amycolatopsis	Amycolatopsis rhabdoformis	GCF_035918295.1	1	1
Amycolatopsis	Amycolatopsis roodepoortensis	GCF_014873915.1	1	1
Amycolatopsis	Amycolatopsis roodepoortensis	GCF_024628825.1	1	1
Amycolatopsis	Amycolatopsis rubida	GCF_900115345.1	1	1
Amycolatopsis	Amycolatopsis solani	GCF_033441515.1	1	1
Amycolatopsis	Amycolatopsis sp. 195334CR	GCF_017309385.1	1	1
Amycolatopsis	Amycolatopsis sp. 2-15	GCF_030285625.1	1	1
Amycolatopsis	Amycolatopsis sp. 2-2	GCF_030264295.1	1	1
Amycolatopsis	Amycolatopsis sp. CA-230715	GCF_018736145.1	1	1
Amycolatopsis	Amycolatopsis sp. CB00013	GCF_001905755.1	1	1
Amycolatopsis	Amycolatopsis sp. DG1A-15b	GCF_030285645.1	1	1
Amycolatopsis	Amycolatopsis sp. DSM 110486	GCF_019468465.1	1	1
Amycolatopsis	Amycolatopsis sp. FDAARGOS 1241	GCF_016889705.1	1	1
Amycolatopsis	Amycolatopsis sp. GM8	GCF_021653975.1	1	1
Amycolatopsis	Amycolatopsis sp. HUAS 11-8	GCF_026802195.1	1	1
Amycolatopsis	Amycolatopsis sp. Hca4	GCF_013364075.1	1	1
Amycolatopsis	Amycolatopsis sp. MJM2582	GCF_000754115.1	1	1
Amycolatopsis	Amycolatopsis sp. NBC_00355	GCF_036104975.1	1	1
Amycolatopsis	Amycolatopsis sp. NBC_00438	GCF_036026695.1	1	1
Amycolatopsis	Amycolatopsis sp. NBC_01286	GCF_035982555.1	1	1
Amycolatopsis	Amycolatopsis sp. NBRC 101858	GCF_030269325.1	1	1
Amycolatopsis	Amycolatopsis sp. NPDC049868	GCF_044461365.1	1	1
Amycolatopsis	Amycolatopsis sp. PS_44_ISF1	GCF_032335455.1	1	1
Amycolatopsis	Amycolatopsis sp. Poz14	GCF_006704225.1	1	1
Amycolatopsis	Amycolatopsis sp. QT-25	GCF_029369745.1	1	1
Amycolatopsis	Amycolatopsis sp. SB7-3	GCF_041021335.1	1	1
Amycolatopsis	Amycolatopsis sp. TNS106	GCF_019330265.1	1	1
Amycolatopsis	Amycolatopsis sp. WAC 01376	GCF_003947415.1	1	1
Amycolatopsis	Amycolatopsis sp. WAC 04197	GCF_003947475.1	1	1
Amycolatopsis	Amycolatopsis sp. WQ 127309	GCF_023023025.1	1	1
Amycolatopsis	Amycolatopsis sp. YIM 10	GCF_009429145.1	1	1
Amycolatopsis	Amycolatopsis sp. cg13	GCF_041346965.1	1	1
Amycolatopsis	Amycolatopsis sp. cg5	GCF_041346955.1	1	1
Amycolatopsis	Amycolatopsis sp. cg9	GCF_041346945.1	1	1
Amycolatopsis	Amycolatopsis sp., V23-08	GCF_034929455.1	1	1
Amycolatopsis	Amycolatopsis suaedae	GCF_004214935.1	1	1
Amycolatopsis	Amycolatopsis sulphurea	GCF_002564045.1	1	1
Amycolatopsis	Amycolatopsis thermalba	GCF_023376025.1	1	1
Amycolatopsis	Amycolatopsis thermoflava	GCF_003752125.1	1	1
Amycolatopsis	Amycolatopsis thermoflava N1165	GCF_000473265.1	1	1
Amycolatopsis	Amycolatopsis umgeniensis	GCF_014205155.1	1	1
Amycolatopsis	Amycolatopsis viridis	GCF_011758765.1	1	1
Kitasatospora	Kitasatospora sp. HUAS MG31	GCF_040571325.1	2	1
Kitasatospora	Kitasatospora acidiphila	GCF_006636205.1	1	1
Kitasatospora	Kitasatospora atroaurantiaca	GCF_007828955.1	1	1
Kitasatospora	Kitasatospora aureofaciens	GCF_002082605.1	1	1
Kitasatospora	Kitasatospora azatica KCTC 9699	GCF_000744785.1	1	1
Kitasatospora	Kitasatospora cathayae	GCF_027627435.1	1	1
Kitasatospora	Kitasatospora cineracea	GCF_003751605.1	1	1
Kitasatospora	Kitasatospora cineracea	GCF_003814885.1	1	1
Kitasatospora	Kitasatospora fiedleri	GCF_948472415.1	1	1
Kitasatospora	Kitasatospora gansuensis	GCF_014203705.1	1	1
Kitasatospora	Kitasatospora griseola	GCF_000836635.1	1	1
Kitasatospora	Kitasatospora herbaricolor	GCF_030813695.1	1	1
Kitasatospora	Kitasatospora herbaricolor	GCF_036226485.1	1	1
Kitasatospora	Kitasatospora indigofera	NBC_00106	1	1
Kitasatospora	Kitasatospora kifunensis	GCF_014203855.1	1	1
Kitasatospora	Kitasatospora mediocidica KCTC 9733	GCF_000744225.1	1	1
Kitasatospora	Kitasatospora paracochleata	GCF_024172095.1	1	1
Kitasatospora	Kitasatospora paranensis	GCF_042661005.1	1	1
Kitasatospora	Kitasatospora purpeofusca	GCF_026340265.1	1	1
Kitasatospora	Kitasatospora purpeofusca	GCF_026340775.1	1	1
Kitasatospora	Kitasatospora purpeofusca	GCF_036010405.1	1	1
Kitasatospora	Kitasatospora purpeofusca	GCF_036010425.1	1	1
Kitasatospora	Kitasatospora purpeofusca	GCF_036200865.1	1	1
Kitasatospora	Kitasatospora purpeofusca	NBC_00061	1	1
Kitasatospora	Kitasatospora purpeofusca	NBC_00845	1	1
Kitasatospora	Kitasatospora purpeofusca	NBC_01555	1	1
Kitasatospora	Kitasatospora setae KM-6054	GCF_000269985.1	1	1
Kitasatospora	Kitasatospora sp. CB02891	GCF_002803145.1	1	1
Kitasatospora	Kitasatospora sp. CM 4170	GCF_032110285.1	1	1
Kitasatospora	Kitasatospora sp. HNM1077	GCF_043950205.1	1	1
Kitasatospora	Kitasatospora sp. MAP12-44	GCF_029892095.1	1	1
Kitasatospora	Kitasatospora sp. MMS16-BH015	GCF_002943525.1	1	1
Kitasatospora	Kitasatospora sp. NA04385	GCF_013364235.1	1	1
Kitasatospora	Kitasatospora sp. NBC 00070	NBC_00070	1	1
Kitasatospora	Kitasatospora sp. NBC 01560	NBC_01560	1	1
Kitasatospora	Kitasatospora sp. NBC_00039	NBC_00039	1	1
Kitasatospora	Kitasatospora sp. NBC_00085	NBC_00085	1	1
Kitasatospora	Kitasatospora sp. NBC_00240	GCF_026342405.1	1	1
Kitasatospora	Kitasatospora sp. NBC_00315	GCF_041435095.1	1	1
Kitasatospora	Kitasatospora sp. NBC_00374	GCF_041434935.1	1	1
Kitasatospora	Kitasatospora sp. NBC_00458	GCF_036013975.1	1	1
Kitasatospora	Kitasatospora sp. NBC_01246	GCF_036226505.1	1	1
Kitasatospora	Kitasatospora sp. NBC_01250	GCF_036226465.1	1	1
Kitasatospora	Kitasatospora sp. NBC_01266	GCF_036242395.1	1	1
Kitasatospora	Kitasatospora sp. NBC_01287	GCF_026340565.1	1	1
Kitasatospora	Kitasatospora sp. NBC_01300	NBC_01300	1	1
Kitasatospora	Kitasatospora sp. NBC_01302	GCF_035976515.1	1	1
Kitasatospora	Kitasatospora sp. NBC_01519	NBC_01519	1	1
Kitasatospora	Kitasatospora sp. NBC_01539	NBC_01539	1	1
Kitasatospora	Kitasatospora sp. YST-16	GCF_026802215.1	1	1
Kitasatospora	Kitasatospora terrestris	GCF_039542905.1	1	1
Kitasatospora	Kitasatospora viridis	GCF_007829815.1	1	1
Kitasatospora	[Kitasatospora] papulosa	GCF_026339595.1	1	1
Kitasatospora	[Kitasatospora] papulosa	GCF_035940175.1	1	1
Kitasatospora	[Kitasatospora] papulosa	GCF_035980495.1	1	1
Kitasatospora	[Kitasatospora] papulosa	GCF_036237255.1	1	1
Kitasatospora	[Kitasatospora] papulosa	GCF_036237335.1	1	1
Kitasatospora	[Kitasatospora] papulosa	GCF_036240075.1	1	1
Kitasatospora	[Kitasatospora] papulosa	GCF_042274505.1	1	1
Kitasatospora	[Kitasatospora] papulosa	GCF_042801505.1	1	1
Kitasatospora	[Kitasatospora] papulosa	GCF_042884395.1	1	1
Kitasatospora	[Kitasatospora] papulosa	GCF_042891995.1	1	1
Kitasatospora	[Kitasatospora] papulosa	GCF_042892105.1	1	1
Kitasatospora	[Kitasatospora] papulosa	GCF_042893865.1	1	1
Kitasatospora	[Kitasatospora] papulosa	GCF_042897115.1	1	1
Kitasatospora	[Kitasatospora] papulosa	GCF_042899935.1	1	1
Kitasatospora	[Kitasatospora] papulosa	GCF_042900515.1	1	1
Kitasatospora	[Kitasatospora] papulosa	GCF_042900585.1	1	1
Kitasatospora	[Kitasatospora] papulosa	GCF_042900745.1	1	1
Kitasatospora	[Kitasatospora] papulosa	GCF_042900785.1	1	1
Kitasatospora	[Kitasatospora] papulosa	GCF_042900825.1	1	1
Kitasatospora	[Kitasatospora] papulosa	GCF_042900945.1	1	1
Kitasatospora	[Kitasatospora] papulosa	GCF_042901225.1	1	1
Kitasatospora	[Kitasatospora] papulosa	GCF_042901245.1	1	1
Kitasatospora	[Kitasatospora] papulosa	GCF_042956595.1	1	1
Kitasatospora	[Kitasatospora] papulosa	GCF_043202035.1	1	1
Kitasatospora	[Kitasatospora] papulosa	GCF_043204455.1	1	1
Kribbella	Kribbella sp. CA-293567	GCF_027627575.1	1	2
Kribbella	Kribbella sp. NBC_01505	NBC_01505	3	1
Kribbella	Kribbella alba	GCF_039529635.1	1	1
Kribbella	Kribbella aluminosa	GCF_017876295.1	1	1
Kribbella	Kribbella amoyensis	GCF_007828865.1	1	1
Kribbella	Kribbella antiqua	GCF_004345665.1	1	1
Kribbella	Kribbella capetownensis	GCF_004331485.1	1	1
Kribbella	Kribbella flavida DSM 17836	GCF_000024345.1	1	1
Kribbella	Kribbella italica	GCF_014205135.1	1	1
Kribbella	Kribbella jejuensis	GCF_006715085.1	1	1
Kribbella	Kribbella jiaozuonensis	GCF_005233875.1	1	1
Kribbella	Kribbella kalugense	GCF_004365875.1	1	1
Kribbella	Kribbella karoonensis	GCF_039529615.1	1	1
Kribbella	Kribbella lupini	GCF_039529595.1	1	1
Kribbella	Kribbella pratensis	GCF_004366075.1	1	1
Kribbella	Kribbella rubisoli	GCF_004217145.1	1	1
Kribbella	Kribbella sandramycini	GCF_014207795.1	1	1
Kribbella	Kribbella shirazensis	GCF_011761605.1	1	1
Kribbella	Kribbella solani	GCF_014205295.1	1	1
Kribbella	Kribbella soli	GCF_004331345.1	1	1
Kribbella	Kribbella sp. ALI-6-A	GCF_001984195.1	1	1
Kribbella	Kribbella sp. CCNWLW201	GCF_037203805.1	1	1
Kribbella	Kribbella sp. HUAS MG21	GCF_040254265.1	1	1
Kribbella	Kribbella sp. NBC 00889	NBC_00889	1	1
Kribbella	Kribbella sp. NBC_00359	GCF_036097425.1	1	1
Kribbella	Kribbella sp. NBC_00382	GCF_036067295.1	1	1
Kribbella	Kribbella sp. NBC_00482	GCF_036013725.1	1	1
Kribbella	Kribbella sp. NBC_00662	GCF_041430295.1	1	1
Kribbella	Kribbella sp. NBC_00709	GCF_036226565.1	1	1
Kribbella	Kribbella sp. NBC_01245	GCF_036226525.1	1	1
Kribbella	Kribbella sp. NPDC000426	GCF_040300265.1	1	1
Kribbella	Kribbella sp. NPDC003505	GCF_040610875.1	1	1
Kribbella	Kribbella sp. NPDC003557	GCF_040610805.1	1	1
Kribbella	Kribbella sp. NPDC004536	GCF_042873835.1	1	1
Kribbella	Kribbella sp. NPDC004875	GCF_042873375.1	1	1
Kribbella	Kribbella sp. NPDC005582	GCF_040605415.1	1	1
Kribbella	Kribbella sp. NPDC023855	GCF_040639475.1	1	1
Kribbella	Kribbella sp. NPDC023972	GCF_040639075.1	1	1
Kribbella	Kribbella sp. NPDC026611	GCF_040638345.1	1	1
Kribbella	Kribbella sp. NPDC048928	GCF_043197975.1	1	1
Kribbella	Kribbella sp. NPDC049174	GCF_043197365.1	1	1
Kribbella	Kribbella sp. NPDC049227	GCF_043197265.1	1	1
Kribbella	Kribbella sp. NPDC049584	GCF_040675555.1	1	1
Kribbella	Kribbella sp. NPDC050459	GCF_040655315.1	1	1
Kribbella	Kribbella sp. NPDC051137	GCF_040682535.1	1	1
Kribbella	Kribbella sp. NPDC051718	GCF_040681515.1	1	1
Kribbella	Kribbella sp. NPDC051770	GCF_040681455.1	1	1
Kribbella	Kribbella sp. NPDC051936	GCF_040680955.1	1	1
Kribbella	Kribbella sp. NPDC056861	GCF_040687575.1	1	1
Kribbella	Kribbella sp. NPDC058693	GCF_042715335.1	1	1
Kribbella	Kribbella sp. VKM Ac-2566	GCF_004366005.1	1	1
Kribbella	Kribbella sp. VKM Ac-2569	GCF_004216905.1	1	1
Kribbella	Kribbella sp. VKM Ac-2571	GCF_004362255.1	1	1
Kribbella	Kribbella speibonae	GCF_004331335.1	1	1
Kribbella	Kribbella speibonae	GCF_004331375.1	1	1
Kribbella	Kribbella steppae	GCF_004342025.1	1	1
Kribbella	Kribbella voronezhensis	GCF_004365175.1	1	1
Micromonospora	Micromonospora sp. A202	GCF_006715105.1	2	1
Micromonospora	Micromonospora zamorensis	GCF_036041405.1	2	1
Micromonospora	Micromonospora zamorensis	GCF_036049935.1	2	1
Micromonospora	Micromonospora zamorensis	GCF_036155935.1	2	1
Micromonospora	Micromonospora zamorensis	GCF_036347075.1	2	1
Micromonospora	Micromonospora zamorensis	GCF_043197555.1	2	1
Micromonospora	Micromonospora arida	GCF_042873005.1	1	1
Micromonospora	Micromonospora aurantiaca	GCF_003351365.1	1	1
Micromonospora	Micromonospora aurantiaca	GCF_020995455.1	1	1
Micromonospora	Micromonospora aurantiaca	GCF_036013875.1	1	1
Micromonospora	Micromonospora aurantiaca	GCF_900090255.1	1	1
Micromonospora	Micromonospora aurantiaca ATCC 27029	GCF_000145235.1	1	1
Micromonospora	Micromonospora chalcea	GCF_028768405.1	1	1
Micromonospora	Micromonospora chalcea	GCF_040299445.1	1	1
Micromonospora	Micromonospora chalcea	GCF_040639205.1	1	1
Micromonospora	Micromonospora chalcea	GCF_040648955.1	1	1
Micromonospora	Micromonospora chalcea	GCF_040656755.1	1	1
Micromonospora	Micromonospora chalcea	GCF_040683415.1	1	1
Micromonospora	Micromonospora chalcea	GCF_043197015.1	1	1
Micromonospora	Micromonospora chokoriensis	GCF_900091505.1	1	1
Micromonospora	Micromonospora chokoriensis	NBC_00295	1	1
Micromonospora	Micromonospora citrea	GCF_900090315.1	1	1
Micromonospora	Micromonospora coxensis	GCF_900090295.1	1	1
Micromonospora	Micromonospora endolithica	GCF_003626595.1	1	1
Micromonospora	Micromonospora ferruginea	GCF_013694245.2	1	1
Micromonospora	Micromonospora globbae	NBC_00256	1	1
Micromonospora	Micromonospora globbae	NBC_01609	1	1
Micromonospora	Micromonospora haikouensis	GCF_000876225.1	1	1
Micromonospora	Micromonospora harpali	GCF_040429615.1	1	1
Micromonospora	Micromonospora humi	GCF_900090105.1	1	1
Micromonospora	Micromonospora jinlongensis	GCF_013410645.1	1	1
Micromonospora	Micromonospora lupini	GCF_042666215.1	1	1
Micromonospora	Micromonospora lupini	NBC_00409	1	1
Micromonospora	Micromonospora lupini str. Lupac 08	GCF_000297395.2	1	1
Micromonospora	Micromonospora maris	GCF_035981415.1	1	1
Micromonospora	Micromonospora mirobrigensis	GCF_900091555.1	1	1
Micromonospora	Micromonospora nigra	GCF_900091585.1	1	1
Micromonospora	Micromonospora noduli	GCF_003264475.1	1	1
Micromonospora	Micromonospora noduli	GCF_040677215.1	1	1
Micromonospora	Micromonospora palomenae	GCF_007829925.1	1	1
Micromonospora	Micromonospora parathelypteridis	GCF_014201145.1	1	1
Micromonospora	Micromonospora peucetia	NBC_01757	1	1
Micromonospora	Micromonospora peucetia	NBC_01809	1	1
Micromonospora	Micromonospora phaseoli	GCF_003253475.1	1	1
Micromonospora	Micromonospora profundi	GCF_011927785.1	1	1
Micromonospora	Micromonospora profundi	GCF_030736795.1	1	1
Micromonospora	Micromonospora profundi	GCF_036906735.1	1	1
Micromonospora	Micromonospora profundi	GCF_042872825.1	1	1
Micromonospora	Micromonospora purpureochromogenes	GCF_013410185.1	1	1
Micromonospora	Micromonospora purpureochromogenes	GCF_040642575.1	1	1
Micromonospora	Micromonospora purpureochromogenes	GCF_900091515.1	1	1
Micromonospora	Micromonospora rifamycinica	GCF_036227385.1	1	1
Micromonospora	Micromonospora rifamycinica	GCF_900090265.1	1	1
Micromonospora	Micromonospora rubida	GCF_009908295.1	1	1
Micromonospora	Micromonospora saelicesensis	GCF_003264445.1	1	1
Micromonospora	Micromonospora saelicesensis	GCF_900091575.1	1	1
Micromonospora	Micromonospora salmantinae	GCF_022230905.1	1	1
Micromonospora	Micromonospora sediminicola	GCF_040631645.1	1	1
Micromonospora	Micromonospora sediminicola	GCF_040632515.1	1	1
Micromonospora	Micromonospora sediminicola	GCF_900089585.1	1	1
Micromonospora	Micromonospora sp. AKA38	GCF_027925725.1	1	1
Micromonospora	Micromonospora sp. BRA006-A	GCF_033433935.1	1	1
Micromonospora	Micromonospora sp. C28ISP2-4	GCF_030519385.1	1	1
Micromonospora	Micromonospora sp. C32	GCF_018070525.1	1	1
Micromonospora	Micromonospora sp. DPT	GCF_039679095.1	1	1
Micromonospora	Micromonospora sp. DSM 102119	GCF_039566965.1	1	1
Micromonospora	Micromonospora sp. DSM 45708	GCF_039566955.1	1	1
Micromonospora	Micromonospora sp. FIMYZ51	GCF_038246755.1	1	1
Micromonospora	Micromonospora sp. HB375	GCF_017872985.1	1	1
Micromonospora	Micromonospora sp. HUAS YX12	GCF_040215685.1	1	1
Micromonospora	Micromonospora sp. L5	GCF_000177655.2	1	1
Micromonospora	Micromonospora sp. LH3U1	GCF_028475105.1	1	1
Micromonospora	Micromonospora sp. LHW51205	GCF_003315815.1	1	1
Micromonospora	Micromonospora sp. NBC 00855	NBC_00855	1	1
Micromonospora	Micromonospora sp. NBC 00858	NBC_00858	1	1
Micromonospora	Micromonospora sp. NBC 00860	NBC_00860	1	1
Micromonospora	Micromonospora sp. NBC 00898	NBC_00898	1	1
Micromonospora	Micromonospora sp. NBC 01638	NBC_01638	1	1
Micromonospora	Micromonospora sp. NBC 01699	NBC_01699	1	1
Micromonospora	Micromonospora sp. NBC 01740	NBC_01740	1	1
Micromonospora	Micromonospora sp. NBC 01796	NBC_01796	1	1
Micromonospora	Micromonospora sp. NBC 01813	NBC_01813	1	1
Micromonospora	Micromonospora sp. NBC_00330	GCF_036136635.1	1	1
Micromonospora	Micromonospora sp. NBC_00362	GCF_026342155.1	1	1
Micromonospora	Micromonospora sp. NBC_00389	NBC_00389	1	1
Micromonospora	Micromonospora sp. NBC_00421	GCF_036017915.1	1	1
Micromonospora	Micromonospora sp. NBC_00617	NBC_00617	1	1
Micromonospora	Micromonospora sp. NBC_00821	GCF_036347035.1	1	1
Micromonospora	Micromonospora sp. NBC_01392	NBC_01392	1	1
Micromonospora	Micromonospora sp. NBC_01405	NBC_01405	1	1
Micromonospora	Micromonospora sp. NBC_01412	NBC_01412	1	1
Micromonospora	Micromonospora sp. NBC_01655	NBC_01655	1	1
Micromonospora	Micromonospora sp. NBC_01739	GCF_035920385.1	1	1
Micromonospora	Micromonospora sp. NBRC 107095	GCF_030269705.1	1	1
Micromonospora	Micromonospora sp. NBRC 110037	GCF_001652995.1	1	1
Micromonospora	Micromonospora sp. NBRC 110038	GCF_020884815.1	1	1
Micromonospora	Micromonospora sp. NPDC000212	GCF_042899035.1	1	1
Micromonospora	Micromonospora sp. NPDC000663	GCF_042898105.1	1	1
Micromonospora	Micromonospora sp. NPDC003816	GCF_042874705.1	1	1
Micromonospora	Micromonospora sp. NPDC005237	GCF_040607775.1	1	1
Micromonospora	Micromonospora sp. NPDC005252	GCF_042872475.1	1	1
Micromonospora	Micromonospora sp. NPDC005254	GCF_042872525.1	1	1
Micromonospora	Micromonospora sp. NPDC005257	GCF_042872445.1	1	1
Micromonospora	Micromonospora sp. NPDC005553	GCF_042871765.1	1	1
Micromonospora	Micromonospora sp. NPDC005686	GCF_042871665.1	1	1
Micromonospora	Micromonospora sp. NPDC007208	GCF_042869175.1	1	1
Micromonospora	Micromonospora sp. NPDC047527	GCF_040643015.1	1	1
Micromonospora	Micromonospora sp. NPDC047557	GCF_043205095.1	1	1
Micromonospora	Micromonospora sp. NPDC047644	GCF_040704315.1	1	1
Micromonospora	Micromonospora sp. NPDC047762	GCF_043204655.1	1	1
Micromonospora	Micromonospora sp. NPDC047793	GCF_040642635.1	1	1
Micromonospora	Micromonospora sp. NPDC048871	GCF_043198155.1	1	1
Micromonospora	Micromonospora sp. NPDC048887	GCF_040649715.1	1	1
Micromonospora	Micromonospora sp. NPDC048905	GCF_040649655.1	1	1
Micromonospora	Micromonospora sp. NPDC048909	GCF_040649635.1	1	1
Micromonospora	Micromonospora sp. NPDC048986	GCF_040649335.1	1	1
Micromonospora	Micromonospora sp. NPDC049107	GCF_040648595.1	1	1
Micromonospora	Micromonospora sp. NPDC049114	GCF_040648635.1	1	1
Micromonospora	Micromonospora sp. NPDC049175	GCF_043197345.1	1	1
Micromonospora	Micromonospora sp. NPDC049203	GCF_043197215.1	1	1
Micromonospora	Micromonospora sp. NPDC049275	GCF_043197115.1	1	1
Micromonospora	Micromonospora sp. NPDC049301	GCF_040678715.1	1	1
Micromonospora	Micromonospora sp. NPDC053740	GCF_040677775.1	1	1
Micromonospora	Micromonospora sp. NPDC085948	GCF_040686315.1	1	1
Micromonospora	Micromonospora sp. NPDC093244	GCF_040683695.1	1	1
Micromonospora	Micromonospora sp. NPDC127501	GCF_040302185.1	1	1
Micromonospora	Micromonospora sp. RHAY321	GCF_023896955.1	1	1
Micromonospora	Micromonospora sp. RL09-050-HVF-A	GCF_019374995.1	1	1
Micromonospora	Micromonospora sp. WMMA1947	GCF_027497355.1	1	1
Micromonospora	Micromonospora sp. WMMA1949	GCF_027460145.1	1	1
Micromonospora	Micromonospora sp. WMMA1976	GCF_027497335.1	1	1
Micromonospora	Micromonospora sp. WMMA1996	GCF_002573675.1	1	1
Micromonospora	Micromonospora sp. WMMA1998	GCF_027497375.1	1	1
Micromonospora	Micromonospora sp. WMMA2032	GCF_002688545.1	1	1
Micromonospora	Micromonospora sp. WMMB235	GCF_001855515.1	1	1
Micromonospora	Micromonospora sp. WMMB482	GCF_019038635.1	1	1
Micromonospora	Micromonospora sp. WMMC241	GCF_027460165.1	1	1
Micromonospora	Micromonospora sp. WMMC250	GCF_027460215.1	1	1
Micromonospora	Micromonospora sp. WMMC264	GCF_027497275.1	1	1
Micromonospora	Micromonospora sp. WMMC273	GCF_027460285.1	1	1
Micromonospora	Micromonospora sp. WMMD1076	GCF_029581475.1	1	1
Micromonospora	Micromonospora sp. WMMD1128	GCF_027497235.1	1	1
Micromonospora	Micromonospora sp. WMMD1155	GCF_029581275.1	1	1
Micromonospora	Micromonospora sp. WMMD710	GCF_029626045.1	1	1
Micromonospora	Micromonospora sp. WMMD718	GCF_029626075.1	1	1
Micromonospora	Micromonospora sp. WMMD882	GCF_027497255.1	1	1
Micromonospora	Micromonospora sp. WMMD956	GCF_029626125.1	1	1
Micromonospora	Micromonospora sp. WMMD961	GCF_029626145.1	1	1
Micromonospora	Micromonospora sp. WMMD964	GCF_029581455.1	1	1
Micromonospora	Micromonospora sp. WMMD967	GCF_029626165.1	1	1
Micromonospora	Micromonospora sp. WMMD975	GCF_029581215.1	1	1
Micromonospora	Micromonospora sp. WMMD980	GCF_029626035.1	1	1
Micromonospora	Micromonospora sp. WMMD987	GCF_029581435.1	1	1
Micromonospora	Micromonospora taraxaci	GCF_007830095.1	1	1
Micromonospora	Micromonospora taraxaci	GCF_040607295.1	1	1
Micromonospora	Micromonospora taraxaci	GCF_040648215.1	1	1
Micromonospora	Micromonospora tulbaghiae	GCF_003612775.1	1	1
Micromonospora	Micromonospora tulbaghiae	GCF_040646855.1	1	1
Micromonospora	Micromonospora tulbaghiae	GCF_040648195.1	1	1
Micromonospora	Micromonospora tulbaghiae	GCF_040649815.1	1	1
Micromonospora	Micromonospora tulbaghiae	GCF_040649855.1	1	1
Micromonospora	Micromonospora tulbaghiae	GCF_040676835.1	1	1
Micromonospora	Micromonospora tulbaghiae	GCF_043197995.1	1	1
Micromonospora	Micromonospora tulbaghiae	GCF_043198115.1	1	1
Micromonospora	Micromonospora tulbaghiae	GCF_043198135.1	1	1
Micromonospora	Micromonospora tulbaghiae	GCF_900091605.1	1	1
Micromonospora	Micromonospora ureilytica	GCF_015751765.1	1	1
Micromonospora	Micromonospora ureilytica	GCF_035920425.1	1	1
Micromonospora	Micromonospora ureilytica	GCF_036010465.1	1	1
Micromonospora	Micromonospora ureilytica	GCF_040639145.1	1	1
Micromonospora	Micromonospora vinacea	GCF_015751785.1	1	1
Micromonospora	Micromonospora violae	GCF_004217135.1	1	1
Micromonospora	Micromonospora zamorensis	GCF_036013855.1	1	1
Micromonospora	Micromonospora zamorensis	GCF_036095495.1	1	1
Micromonospora	Micromonospora zamorensis	GCF_040607735.1	1	1
Micromonospora	Micromonospora zamorensis	GCF_040631145.1	1	1
Micromonospora	Micromonospora zamorensis	GCF_040631175.1	1	1
Micromonospora	Micromonospora zamorensis	GCF_041429925.1	1	1
Micromonospora	Micromonospora zamorensis	GCF_042872925.1	1	1
Micromonospora	Micromonospora zamorensis	GCF_042872945.1	1	1
Micromonospora	Micromonospora zamorensis	GCF_900090275.1	1	1
Micromonospora	Micromonospora zamorensis	NBC_01611	1	1
Micromonospora	Micromonospora zingiberis	GCF_004331455.1	1	1
Micromonospora	Micromonospora sp. WMMC415	GCF_009707425.1	1	0
Nocardia	Nocardia otitidiscaviarum	GCF_007362295.1	2	1
Nocardia	Nocardia sp. NPDC058480	GCF_042720495.1	2	1
Nocardia	Nocardia abscessus	GCF_015478245.1	1	1
Nocardia	Nocardia abscessus	GCF_020731305.1	1	1
Nocardia	Nocardia africana	GCF_020731565.1	1	1
Nocardia	Nocardia amikacinitolerans	GCF_024171985.1	1	1
Nocardia	Nocardia amikacinitolerans	GCF_024172025.1	1	1
Nocardia	Nocardia amikacinitolerans	GCF_024172145.1	1	1
Nocardia	Nocardia amikacinitolerans	GCF_042874435.1	1	1
Nocardia	Nocardia amikacinitolerans	GCF_900215415.1	1	1
Nocardia	Nocardia aobensis	GCF_042874255.1	1	1
Nocardia	Nocardia asteroides	GCF_040635065.1	1	1
Nocardia	Nocardia asteroides	GCF_040638675.1	1	1
Nocardia	Nocardia asteroides	GCF_042726635.1	1	1
Nocardia	Nocardia asteroides NBRC 15531	GCF_000308355.2	1	1
Nocardia	Nocardia asteroides NBRC 15531	GCF_005863255.1	1	1
Nocardia	Nocardia beijingensis	GCF_040632275.1	1	1
Nocardia	Nocardia bhagyanarayanae	GCF_006716565.1	1	1
Nocardia	Nocardia camponoti	GCF_014646135.1	1	1
Nocardia	Nocardia canadensis	GCF_032656385.1	1	1
Nocardia	Nocardia cerradoensis	GCF_012396065.1	1	1
Nocardia	Nocardia coubleae NBRC 108252	GCF_001612805.1	1	1
Nocardia	Nocardia cyriacigeorgica	GCF_002949635.1	1	1
Nocardia	Nocardia cyriacigeorgica	GCF_015477705.1	1	1
Nocardia	Nocardia cyriacigeorgica	GCF_015477725.1	1	1
Nocardia	Nocardia cyriacigeorgica	GCF_015477865.1	1	1
Nocardia	Nocardia cyriacigeorgica	GCF_015477945.1	1	1
Nocardia	Nocardia cyriacigeorgica	GCF_015477995.1	1	1
Nocardia	Nocardia cyriacigeorgica	GCF_015478255.1	1	1
Nocardia	Nocardia cyriacigeorgica	GCF_029867425.1	1	1
Nocardia	Nocardia cyriacigeorgica	GCF_029867605.1	1	1
Nocardia	Nocardia cyriacigeorgica	GCF_029867665.1	1	1
Nocardia	Nocardia cyriacigeorgica	GCF_029867685.1	1	1
Nocardia	Nocardia cyriacigeorgica	GCF_029868005.1	1	1
Nocardia	Nocardia cyriacigeorgica	GCF_029868265.1	1	1
Nocardia	Nocardia cyriacigeorgica	GCF_029868465.1	1	1
Nocardia	Nocardia cyriacigeorgica	GCF_029868685.1	1	1
Nocardia	Nocardia cyriacigeorgica	GCF_029868705.1	1	1
Nocardia	Nocardia cyriacigeorgica	GCF_029868765.1	1	1
Nocardia	Nocardia cyriacigeorgica	GCF_029868785.1	1	1
Nocardia	Nocardia cyriacigeorgica	GCF_029868805.1	1	1
Nocardia	Nocardia cyriacigeorgica	GCF_029868825.1	1	1
Nocardia	Nocardia cyriacigeorgica	GCF_029869825.1	1	1
Nocardia	Nocardia cyriacigeorgica	GCF_036086475.1	1	1
Nocardia	Nocardia cyriacigeorgica	GCF_900683635.1	1	1
Nocardia	Nocardia donostiensis	GCF_001989395.1	1	1
Nocardia	Nocardia donostiensis	GCF_002081795.1	1	1
Nocardia	Nocardia elegans	GCF_015478225.1	1	1
Nocardia	Nocardia elegans	GCF_042891725.1	1	1
Nocardia	Nocardia farcinica	GCF_001182745.1	1	1
Nocardia	Nocardia farcinica	GCF_015477525.1	1	1
Nocardia	Nocardia farcinica	GCF_015477685.1	1	1
Nocardia	Nocardia farcinica	GCF_015477875.1	1	1
Nocardia	Nocardia farcinica	GCF_015477925.1	1	1
Nocardia	Nocardia farcinica	GCF_015478355.1	1	1
Nocardia	Nocardia farcinica	GCF_020883195.1	1	1
Nocardia	Nocardia farcinica	GCF_029867505.1	1	1
Nocardia	Nocardia farcinica	GCF_029869775.1	1	1
Nocardia	Nocardia farcinica	GCF_038244785.1	1	1
Nocardia	Nocardia farcinica	GCF_900455745.1	1	1
Nocardia	Nocardia farcinica	GCF_900683605.1	1	1
Nocardia	Nocardia farcinica IFM 10152	GCF_000009805.1	1	1
Nocardia	Nocardia fluminea	GCF_002846365.1	1	1
Nocardia	Nocardia fluminea	GCF_040639395.1	1	1
Nocardia	Nocardia fluminea	GCF_040639755.1	1	1
Nocardia	Nocardia fluminea	GCF_040640015.1	1	1
Nocardia	Nocardia fluminea	GCF_040655975.1	1	1
Nocardia	Nocardia fluminea	GCF_040681535.1	1	1
Nocardia	Nocardia fluminea	GCF_042714845.1	1	1
Nocardia	Nocardia fluminea	GCF_043199615.1	1	1
Nocardia	Nocardia gamkensis	GCF_012396055.1	1	1
Nocardia	Nocardia gipuzkoensis	GCF_021183645.1	1	1
Nocardia	Nocardia halotolerans	GCF_042650145.1	1	1
Nocardia	Nocardia harenae NBRC 108248	GCF_001612885.1	1	1
Nocardia	Nocardia huaxiensis	GCF_013744875.1	1	1
Nocardia	Nocardia huaxiensis	GCF_021044705.1	1	1
Nocardia	Nocardia inohanensis NBRC 100128	GCF_001612945.1	1	1
Nocardia	Nocardia kruczakiae	GCF_031457585.1	1	1
Nocardia	Nocardia mexicana	GCF_003350525.1	1	1
Nocardia	Nocardia mikamii NBRC 108933	GCF_001613505.1	1	1
Nocardia	Nocardia neocaledoniensis	GCF_003182135.1	1	1
Nocardia	Nocardia nova	GCF_030709715.1	1	1
Nocardia	Nocardia nova	GCF_043204555.1	1	1
Nocardia	Nocardia otitidiscaviarum	GCF_015477295.1	1	1
Nocardia	Nocardia otitidiscaviarum	GCF_900454305.1	1	1
Nocardia	Nocardia puris	GCF_015478145.1	1	1
Nocardia	Nocardia puris	GCF_036051655.1	1	1
Nocardia	Nocardia rhizosphaerae	GCF_042650365.1	1	1
Nocardia	Nocardia rhizosphaerihabitans	GCF_014646295.1	1	1
Nocardia	Nocardia rosealba	GCF_020216065.1	1	1
Nocardia	Nocardia salmonicida	GCF_036142455.1	1	1
Nocardia	Nocardia salmonicida	GCF_036150455.1	1	1
Nocardia	Nocardia salmonicida	GCF_040655095.1	1	1
Nocardia	Nocardia salmonicida	GCF_040655375.1	1	1
Nocardia	Nocardia salmonicida	GCF_040675025.1	1	1
Nocardia	Nocardia salmonicida	GCF_042671815.1	1	1
Nocardia	Nocardia salmonicida	NBC_01413	1	1
Nocardia	Nocardia seriolae	GCF_014117305.1	1	1
Nocardia	Nocardia sp. AG03	GCF_029675105.1	1	1
Nocardia	Nocardia sp. BMG111209	GCF_000381925.1	1	1
Nocardia	Nocardia sp. BMG51109	GCF_000526215.1	1	1
Nocardia	Nocardia sp. CDC153	GCF_035818515.1	1	1
Nocardia	Nocardia sp. CDC160	GCF_035818795.1	1	1
Nocardia	Nocardia sp. FDAARGOS_372	GCF_002554515.1	1	1
Nocardia	Nocardia sp. NBC 00403	NBC_00403	1	1
Nocardia	Nocardia sp. NBC 00565	NBC_00565	1	1
Nocardia	Nocardia sp. NBC 00881	NBC_00881	1	1
Nocardia	Nocardia sp. NBC 01009	NBC_01009	1	1
Nocardia	Nocardia sp. NBC 01503	NBC_01503	1	1
Nocardia	Nocardia sp. NBC 01730	NBC_01730	1	1
Nocardia	Nocardia sp. NBC_00416	GCF_036032445.1	1	1
Nocardia	Nocardia sp. NBC_00508	GCF_036346875.1	1	1
Nocardia	Nocardia sp. NBC_00511	NBC_00511	1	1
Nocardia	Nocardia sp. NBC_01327	GCF_035958815.1	1	1
Nocardia	Nocardia sp. NBC_01329	GCF_035956715.1	1	1
Nocardia	Nocardia sp. NBC_01377	NBC_01377	1	1
Nocardia	Nocardia sp. NBC_01388	NBC_01388	1	1
Nocardia	Nocardia sp. NBC_01499	NBC_01499	1	1
Nocardia	Nocardia sp. NPDC004068	GCF_042874315.1	1	1
Nocardia	Nocardia sp. NPDC004654	GCF_040609595.1	1	1
Nocardia	Nocardia sp. NPDC005825	GCF_040630175.1	1	1
Nocardia	Nocardia sp. NPDC006630	GCF_040611495.1	1	1
Nocardia	Nocardia sp. NPDC019219	GCF_040632645.1	1	1
Nocardia	Nocardia sp. NPDC019395	GCF_040632335.1	1	1
Nocardia	Nocardia sp. NPDC023988	GCF_040639005.1	1	1
Nocardia	Nocardia sp. NPDC047648	GCF_040642815.1	1	1
Nocardia	Nocardia sp. NPDC050378	GCF_040655675.1	1	1
Nocardia	Nocardia sp. NPDC050413	GCF_040655475.1	1	1
Nocardia	Nocardia sp. NPDC050697	GCF_040654395.1	1	1
Nocardia	Nocardia sp. NPDC050717	GCF_040654275.1	1	1
Nocardia	Nocardia sp. NPDC050718	GCF_040654235.1	1	1
Nocardia	Nocardia sp. NPDC051030	GCF_040683015.1	1	1
Nocardia	Nocardia sp. NPDC051832	GCF_040681285.1	1	1
Nocardia	Nocardia sp. NPDC051833	GCF_040681225.1	1	1
Nocardia	Nocardia sp. NPDC052001	GCF_040680615.1	1	1
Nocardia	Nocardia sp. NPDC052254	GCF_040679495.1	1	1
Nocardia	Nocardia sp. NPDC056064	GCF_042266925.1	1	1
Nocardia	Nocardia sp. NPDC056611	GCF_042792755.1	1	1
Nocardia	Nocardia sp. NPDC056952	GCF_042674185.1	1	1
Nocardia	Nocardia sp. NPDC057668	GCF_042799795.1	1	1
Nocardia	Nocardia sp. NPDC058114	GCF_042884695.1	1	1
Nocardia	Nocardia sp. NPDC058176	GCF_042883805.1	1	1
Nocardia	Nocardia sp. NPDC058379	GCF_042723155.1	1	1
Nocardia	Nocardia sp. NPDC059180	GCF_042754945.1	1	1
Nocardia	Nocardia sp. NPDC060249	GCF_042728755.1	1	1
Nocardia	Nocardia sp. NPDC127579	GCF_042672005.1	1	1
Nocardia	Nocardia sp. NPDC127606	GCF_042671725.1	1	1
Nocardia	Nocardia sp. PE-7	GCF_030486425.1	1	1
Nocardia	Nocardia sp. Root136	GCF_001427185.1	1	1
Nocardia	Nocardia sp. XZ_19_231	GCF_015355705.1	1	1
Nocardia	Nocardia sp. XZ_19_385	GCF_015355755.1	1	1
Nocardia	Nocardia sp. alder85J	GCF_020176955.2	1	1
Nocardia	Nocardia spumae	GCF_020733635.1	1	1
Nocardia	Nocardia sputorum	GCF_027924345.1	1	1
Nocardia	Nocardia sputorum	GCF_027924405.1	1	1
Nocardia	Nocardia tengchongensis	GCF_040655195.1	1	1
Nocardia	Nocardia tengchongensis	GCF_042753925.1	1	1
Nocardia	Nocardia tengchongensis	GCF_042754145.1	1	1
Nocardia	Nocardia tengchongensis	GCF_042874375.1	1	1
Nocardia	Nocardia transvalensis	GCF_014203315.1	1	1
Nocardia	Nocardia vinacea	NBC_01482	1	1
Nocardia	Nocardia vinacea	NBC_01743	1	1
Nocardia	Nocardia yamanashiensis	GCF_021183565.1	1	1
Pseudonocardia	Pseudonocardia alni	GCF_040296245.1	1	2
Pseudonocardia	Pseudonocardia sp. UM4_GMWB1	GCF_017312155.1	1	2
Pseudonocardia	Pseudonocardia alni	GCF_031082045.1	1	1
Pseudonocardia	Pseudonocardia alni	GCF_040653255.1	1	1
Pseudonocardia	Pseudonocardia alni	GCF_043197075.1	1	1
Pseudonocardia	Pseudonocardia antarctica	GCF_013408715.1	1	1
Pseudonocardia	Pseudonocardia carboxydivorans	GCF_038039445.1	1	1
Pseudonocardia	Pseudonocardia sp.	GCF_017305975.1	1	1
Pseudonocardia	Pseudonocardia sp. C8	GCF_014267175.1	1	1
Pseudonocardia	Pseudonocardia sp. DW16-2	GCF_037727765.1	1	1
Pseudonocardia	Pseudonocardia sp. HH130629-09	GCF_001294645.1	1	1
Pseudonocardia	Pseudonocardia sp. WMMC193	GCF_021728735.1	1	1
Pseudonocardia	Pseudonocardia sulfidoxydans	GCF_042657685.1	1	1
Pseudonocardia	Pseudonocardia thermophila	GCF_900142365.1	1	1
Rhodococcus	Rhodococcus aetherivorans	GCF_000470885.1	1	1
Rhodococcus	Rhodococcus aetherivorans	GCF_000982715.1	1	1
Rhodococcus	Rhodococcus aetherivorans	GCF_014230025.1	1	1
Rhodococcus	Rhodococcus aetherivorans	GCF_016839185.1	1	1
Rhodococcus	Rhodococcus aetherivorans	GCF_021165915.1	1	1
Rhodococcus	Rhodococcus aetherivorans	GCF_025722975.1	1	1
Rhodococcus	Rhodococcus aetherivorans	GCF_029691645.1	1	1
Rhodococcus	Rhodococcus aetherivorans	GCF_030550835.1	1	1
Rhodococcus	Rhodococcus aetherivorans	GCF_039565925.1	1	1
Rhodococcus	Rhodococcus coprophilus	GCF_040655995.1	1	1
Rhodococcus	Rhodococcus coprophilus	GCF_040678935.1	1	1
Rhodococcus	Rhodococcus coprophilus NBRC 100603	GCF_001895045.1	1	1
Rhodococcus	Rhodococcus erythropolis	GCF_000975175.1	1	1
Rhodococcus	Rhodococcus erythropolis	GCF_001715845.1	1	1
Rhodococcus	Rhodococcus erythropolis	GCF_001831305.1	1	1
Rhodococcus	Rhodococcus erythropolis	GCF_017068035.1	1	1
Rhodococcus	Rhodococcus erythropolis	GCF_022059865.1	1	1
Rhodococcus	Rhodococcus erythropolis	GCF_024349805.1	1	1
Rhodococcus	Rhodococcus erythropolis	GCF_024809795.1	1	1
Rhodococcus	Rhodococcus erythropolis	GCF_025961405.1	1	1
Rhodococcus	Rhodococcus erythropolis	GCF_029958325.1	1	1
Rhodococcus	Rhodococcus erythropolis	GCF_036964505.1	1	1
Rhodococcus	Rhodococcus erythropolis	GCF_042880415.1	1	1
Rhodococcus	Rhodococcus erythropolis	GCF_900101565.1	1	1
Rhodococcus	Rhodococcus erythropolis	GCF_937770285.1	1	1
Rhodococcus	Rhodococcus erythropolis CCM2595	GCF_000454045.1	1	1
Rhodococcus	Rhodococcus erythropolis PR4	GCF_000010105.1	1	1
Rhodococcus	Rhodococcus globerulus	GCF_019334125.1	1	1
Rhodococcus	Rhodococcus globerulus NBRC 14531	GCF_001894805.1	1	1
Rhodococcus	Rhodococcus gordoniae	GCF_024362245.1	1	1
Rhodococcus	Rhodococcus gordoniae	GCF_900455725.1	1	1
Rhodococcus	Rhodococcus jostii	GCF_042682305.1	1	1
Rhodococcus	Rhodococcus koreensis	GCF_900105905.1	1	1
Rhodococcus	Rhodococcus opacus	GCF_001685605.1	1	1
Rhodococcus	Rhodococcus opacus	GCF_003626495.1	1	1
Rhodococcus	Rhodococcus opacus	GCF_012931745.1	1	1
Rhodococcus	Rhodococcus opacus	GCF_014138705.1	1	1
Rhodococcus	Rhodococcus opacus	GCF_017916235.1	1	1
Rhodococcus	Rhodococcus opacus	GCF_022655485.1	1	1
Rhodococcus	Rhodococcus opacus	GCF_022985635.2	1	1
Rhodococcus	Rhodococcus opacus	GCF_026062495.1	1	1
Rhodococcus	Rhodococcus opacus	GCF_030656675.1	1	1
Rhodococcus	Rhodococcus opacus	GCF_033842605.1	1	1
Rhodococcus	Rhodococcus opacus	GCF_040961855.1	1	1
Rhodococcus	Rhodococcus opacus	GCF_910591545.1	1	1
Rhodococcus	Rhodococcus opacus PD630	GCF_020542785.1	1	1
Rhodococcus	Rhodococcus oryzae	GCF_005049235.1	1	1
Rhodococcus	Rhodococcus oxybenzonivorans	GCF_003130705.1	1	1
Rhodococcus	Rhodococcus pseudokoreensis	GCF_017068395.1	1	1
Rhodococcus	Rhodococcus pyridinivorans	GCF_002269365.1	1	1
Rhodococcus	Rhodococcus pyridinivorans	GCF_003288095.1	1	1
Rhodococcus	Rhodococcus pyridinivorans	GCF_016598695.1	1	1
Rhodococcus	Rhodococcus pyridinivorans	GCF_019095205.1	1	1
Rhodococcus	Rhodococcus pyridinivorans	GCF_021165995.1	1	1
Rhodococcus	Rhodococcus pyridinivorans	GCF_023238485.1	1	1
Rhodococcus	Rhodococcus pyridinivorans	GCF_023822085.1	1	1
Rhodococcus	Rhodococcus pyridinivorans	GCF_024266895.1	1	1
Rhodococcus	Rhodococcus pyridinivorans	GCF_024760325.1	1	1
Rhodococcus	Rhodococcus pyridinivorans	GCF_030979975.1	1	1
Rhodococcus	Rhodococcus pyridinivorans	GCF_042873335.1	1	1
Rhodococcus	Rhodococcus pyridinivorans	GCF_042888185.1	1	1
Rhodococcus	Rhodococcus qingshengii	GCF_001623435.1	1	1
Rhodococcus	Rhodococcus qingshengii	GCF_001662505.1	1	1
Rhodococcus	Rhodococcus qingshengii	GCF_002087025.1	1	1
Rhodococcus	Rhodococcus qingshengii	GCF_002893965.1	1	1
Rhodococcus	Rhodococcus qingshengii	GCF_008306195.1	1	1
Rhodococcus	Rhodococcus qingshengii	GCF_015034605.1	1	1
Rhodococcus	Rhodococcus qingshengii	GCF_015678935.1	1	1
Rhodococcus	Rhodococcus qingshengii	GCF_016722835.1	1	1
Rhodococcus	Rhodococcus qingshengii	GCF_017795725.1	1	1
Rhodococcus	Rhodococcus qingshengii	GCF_017910955.1	1	1
Rhodococcus	Rhodococcus qingshengii	GCF_019048925.1	1	1
Rhodococcus	Rhodococcus qingshengii	GCF_019734155.1	1	1
Rhodococcus	Rhodococcus qingshengii	GCF_020535445.1	1	1
Rhodococcus	Rhodococcus qingshengii	GCF_021165975.1	1	1
Rhodococcus	Rhodococcus qingshengii	GCF_024498635.1	1	1
Rhodococcus	Rhodococcus qingshengii	GCF_025370975.1	1	1
Rhodococcus	Rhodococcus qingshengii	GCF_026074015.1	1	1
Rhodococcus	Rhodococcus qingshengii	GCF_032423855.1	1	1
Rhodococcus	Rhodococcus qingshengii	GCF_032936355.1	1	1
Rhodococcus	Rhodococcus qingshengii	GCF_037463925.1	1	1
Rhodococcus	Rhodococcus qingshengii	GCF_038096185.1	1	1
Rhodococcus	Rhodococcus qingshengii	GCF_041875035.1	1	1
Rhodococcus	Rhodococcus qingshengii	GCF_042721755.1	1	1
Rhodococcus	Rhodococcus qingshengii JCM 15477	GCF_023221595.1	1	1
Rhodococcus	Rhodococcus rhodochrous	GCF_003004765.2	1	1
Rhodococcus	Rhodococcus rhodochrous	GCF_009883715.1	1	1
Rhodococcus	Rhodococcus rhodochrous	GCF_014854695.1	1	1
Rhodococcus	Rhodococcus rhodochrous	GCF_020637575.2	1	1
Rhodococcus	Rhodococcus rhodochrous	GCF_029457455.1	1	1
Rhodococcus	Rhodococcus ruber	GCF_002741725.1	1	1
Rhodococcus	Rhodococcus ruber	GCF_002863905.1	1	1
Rhodococcus	Rhodococcus ruber	GCF_003586525.1	1	1
Rhodococcus	Rhodococcus ruber	GCF_006351985.2	1	1
Rhodococcus	Rhodococcus ruber	GCF_016804345.1	1	1
Rhodococcus	Rhodococcus ruber	GCF_017875715.1	1	1
Rhodococcus	Rhodococcus ruber	GCF_021852985.1	1	1
Rhodococcus	Rhodococcus ruber	GCF_023278385.1	1	1
Rhodococcus	Rhodococcus ruber	GCF_030490385.1	1	1
Rhodococcus	Rhodococcus ruber	GCF_038853135.1	1	1
Rhodococcus	Rhodococcus ruber	GCF_044227165.1	1	1
Rhodococcus	Rhodococcus ruber Chol-4	GCF_000347955.2	1	1
Rhodococcus	Rhodococcus sp. 008	GCF_001682295.1	1	1
Rhodococcus	Rhodococcus sp. 105337	GCF_012844225.1	1	1
Rhodococcus	Rhodococcus sp. 11-3	GCF_023704055.1	1	1
Rhodococcus	Rhodococcus sp. 21391	GCF_016772255.1	1	1
Rhodococcus	Rhodococcus sp. 2G	GCF_001886355.1	1	1
Rhodococcus	Rhodococcus sp. 3-2	GCF_020782825.1	1	1
Rhodococcus	Rhodococcus sp. 3A	GCF_014230115.1	1	1
Rhodococcus	Rhodococcus sp. ACPA1	GCF_002300195.1	1	1
Rhodococcus	Rhodococcus sp. ACPA4	GCF_002300185.1	1	1
Rhodococcus	Rhodococcus sp. AD45	GCF_000949305.1	1	1
Rhodococcus	Rhodococcus sp. AD45-ID	GCF_003023755.1	1	1
Rhodococcus	Rhodococcus sp. AH-ZY2	GCF_030916465.1	1	1
Rhodococcus	Rhodococcus sp. AQ5-07	GCF_003313445.1	1	1
Rhodococcus	Rhodococcus sp. B50	GCF_013602415.1	1	1
Rhodococcus	Rhodococcus sp. BH4	GCF_002079265.1	1	1
Rhodococcus	Rhodococcus sp. BL-253-APC-6A1W	GCF_012843405.1	1	1
Rhodococcus	Rhodococcus sp. C-2	GCF_027854095.1	1	1
Rhodococcus	Rhodococcus sp. C1	GCF_020809065.1	1	1
Rhodococcus	Rhodococcus sp. CH91	GCF_022554085.1	1	1
Rhodococcus	Rhodococcus sp. D-46	GCF_011290655.1	1	1
Rhodococcus	Rhodococcus sp. D-6	GCF_040256695.1	1	1
Rhodococcus	Rhodococcus sp. DK176	GCF_038447315.1	1	1
Rhodococcus	Rhodococcus sp. DK180	GCF_038447005.1	1	1
Rhodococcus	Rhodococcus sp. DMF-1	GCF_021441945.1	1	1
Rhodococcus	Rhodococcus sp. DMU1	GCF_012272955.1	1	1
Rhodococcus	Rhodococcus sp. DN22	GCF_036669995.1	1	1
Rhodococcus	Rhodococcus sp. GA1	GCF_024321955.1	1	1
Rhodococcus	Rhodococcus sp. GOMB7	GCF_018729485.1	1	1
Rhodococcus	Rhodococcus sp. H-CA8f	GCF_002501585.1	1	1
Rhodococcus	Rhodococcus sp. HNM0569	GCF_012726205.1	1	1
Rhodococcus	Rhodococcus sp. JS3073	GCF_026810085.1	1	1
Rhodococcus	Rhodococcus sp. JVH1	GCF_000280725.2	1	1
Rhodococcus	Rhodococcus sp. KBS0724	GCF_005938745.2	1	1
Rhodococcus	Rhodococcus sp. LW-XY12	GCF_019317345.1	1	1
Rhodococcus	Rhodococcus sp. M8	GCF_001890475.2	1	1
Rhodococcus	Rhodococcus sp. MS13	GCF_013277835.1	1	1
Rhodococcus	Rhodococcus sp. MS16	GCF_013277795.1	1	1
Rhodococcus	Rhodococcus sp. NBC 00294	NBC_00294	1	1
Rhodococcus	Rhodococcus sp. NBC 00297	NBC_00297	1	1
Rhodococcus	Rhodococcus sp. NJ-530	GCF_003860625.1	1	1
Rhodococcus	Rhodococcus sp. NPDC047139	GCF_040643435.1	1	1
Rhodococcus	Rhodococcus sp. NPDC049939	GCF_040656415.1	1	1
Rhodococcus	Rhodococcus sp. NPDC056516	GCF_042794655.1	1	1
Rhodococcus	Rhodococcus sp. NPDC056743	GCF_042790355.1	1	1
Rhodococcus	Rhodococcus sp. NPDC058521	GCF_042719695.1	1	1
Rhodococcus	Rhodococcus sp. NPDC058639	GCF_042717545.1	1	1
Rhodococcus	Rhodococcus sp. NPDC059179	GCF_042754885.1	1	1
Rhodococcus	Rhodococcus sp. NPDC060176	GCF_042728675.1	1	1
Rhodococcus	Rhodococcus sp. NyZ502	GCF_041464245.1	1	1
Rhodococcus	Rhodococcus sp. OAS809	GCF_040546695.1	1	1
Rhodococcus	Rhodococcus sp. OK302	GCF_002245895.1	1	1
Rhodococcus	Rhodococcus sp. OK611	GCF_003050885.1	1	1
Rhodococcus	Rhodococcus sp. P-2	GCF_016598535.1	1	1
Rhodococcus	Rhodococcus sp. PD04	GCF_035918275.1	1	1
Rhodococcus	Rhodococcus sp. PSBB049	GCF_017068295.1	1	1
Rhodococcus	Rhodococcus sp. PvP104	GCF_017876985.1	1	1
Rhodococcus	Rhodococcus sp. PvR044	GCF_040548995.1	1	1
Rhodococcus	Rhodococcus sp. PvR099	GCF_017833315.1	1	1
Rhodococcus	Rhodococcus sp. Q1	GCF_004153645.1	1	1
Rhodococcus	Rhodococcus sp. RCBS9	GCF_029457415.1	1	1
Rhodococcus	Rhodococcus sp. RD6.2	GCF_001040705.1	1	1
Rhodococcus	Rhodococcus sp. RDE2	GCF_020885655.1	1	1
Rhodococcus	Rhodococcus sp. SG20037	GCF_031763325.1	1	1
Rhodococcus	Rhodococcus sp. USK10	GCF_019378875.1	1	1
Rhodococcus	Rhodococcus sp. USK13	GCF_018343855.1	1	1
Rhodococcus	Rhodococcus sp. WAY2	GCF_009859915.1	1	1
Rhodococcus	Rhodococcus sp. WB1	GCF_001700945.1	1	1
Rhodococcus	Rhodococcus sp. WB9	GCF_007558985.1	1	1
Rhodococcus	Rhodococcus sp. WMMA185	GCF_001767395.1	1	1
Rhodococcus	Rhodococcus sp. WS1	GCF_003797745.1	1	1
Rhodococcus	Rhodococcus sp. WS3	GCF_003797085.1	1	1
Rhodococcus	Rhodococcus sp. WY5	GCF_018588185.1	1	1
Rhodococcus	Rhodococcus sp. YL-1	GCF_001942025.1	1	1
Rhodococcus	Rhodococcus sp. Z13	GCF_025837095.1	1	1
Rhodococcus	Rhodococcus sp. ZPP	GCF_017656075.1	1	1
Rhodococcus	Rhodococcus sp. p52	GCF_000763325.2	1	1
Rhodococcus	Rhodococcus spelaei	GCF_006704125.1	1	1
Rhodococcus	Rhodococcus spongiicola	GCF_004011835.1	1	1
Rhodococcus	Rhodococcus wratislaviensis	GCF_003385055.1	1	1
Rhodococcus	Rhodococcus wratislaviensis	GCF_041228765.1	1	1
Rhodococcus	Rhodococcus xishaensis	GCF_004011825.1	1	1
Rhodococcus	Rhodococcus zopfii	GCF_041393875.1	1	1
Rhodococcus	uncultured Rhodococcus sp.	GCF_937864515.1	1	1
Rhodococcus	Rhodococcus pyridinivorans JCM 10940 = NBRC 100608	GCF_001894905.1	1	0
Saccharopolyspora	Saccharopolyspora antimicrobica	GCF_003635025.1	1	1
Saccharopolyspora	Saccharopolyspora cebuensis	GCF_039542665.1	1	1
Saccharopolyspora	Saccharopolyspora dendranthemae	GCF_007829955.1	1	1
Saccharopolyspora	Saccharopolyspora endophytica	GCF_018070075.1	1	1
Saccharopolyspora	Saccharopolyspora erythraea	GCF_016859185.1	1	1
Saccharopolyspora	Saccharopolyspora flava	GCF_900116135.1	1	1
Saccharopolyspora	Saccharopolyspora gloriosae	GCF_014203325.1	1	1
Saccharopolyspora	Saccharopolyspora gregorii	GCF_024734405.1	1	1
Saccharopolyspora	Saccharopolyspora halophila	GCF_039531955.1	1	1
Saccharopolyspora	Saccharopolyspora hirsuta	GCF_008630535.1	1	1
Saccharopolyspora	Saccharopolyspora hordei	GCF_013410345.1	1	1
Saccharopolyspora	Saccharopolyspora ipomoeae	GCF_029952525.1	1	1
Saccharopolyspora	Saccharopolyspora kobensis	GCF_900108315.1	1	1
Saccharopolyspora	Saccharopolyspora phatthalungensis	GCF_014203395.1	1	1
Saccharopolyspora	Saccharopolyspora rectivirgula	GCF_000710755.1	1	1
Saccharopolyspora	Saccharopolyspora rhizosphaerae	GCF_003931915.1	1	1
Saccharopolyspora	Saccharopolyspora rosea	GCF_025643595.1	1	1
Saccharopolyspora	Saccharopolyspora sp. ASAGF58	GCF_012277335.1	1	1
Saccharopolyspora	Saccharopolyspora sp. HNM0986	GCF_016526145.1	1	1
Saccharopolyspora	Saccharopolyspora sp. NPDC049426	GCF_040676935.1	1	1
Saccharopolyspora	Saccharopolyspora sp. SCSIO 74807	GCF_037023755.1	1	1
Saccharopolyspora	Saccharopolyspora spinosa	GCF_043574655.1	1	1
Saccharothrix	Saccharothrix sp. HUAS TT1	GCF_040744945.1	1	2
Saccharothrix	Saccharothrix australiensis	GCF_003634935.1	1	1
Saccharothrix	Saccharothrix carnea	GCF_003014735.1	1	1
Saccharothrix	Saccharothrix coeruleofusca	GCF_017876325.1	1	1
Saccharothrix	Saccharothrix ecbatanensis	GCF_014205015.1	1	1
Saccharothrix	Saccharothrix espanaensis DSM 44229	GCF_000328705.1	1	1
Saccharothrix	Saccharothrix longispora	GCF_031455225.1	1	1
Saccharothrix	Saccharothrix obliqua	GCF_019375475.1	1	1
Saccharothrix	Saccharothrix saharensis	GCF_006716745.1	1	1
Saccharothrix	Saccharothrix sp. 6-C	GCF_016695385.1	1	1
Saccharothrix	Saccharothrix syringae	GCF_009498035.1	1	1
Saccharothrix	Saccharothrix tamanrassetensis	GCF_014203665.1	1	1
Saccharothrix	Saccharothrix texasensis	GCF_003752005.1	1	1
Saccharothrix	Saccharothrix variisporea	GCF_003634995.1	1	1
Saccharothrix	Saccharothrix violaceirubra	GCF_014203755.1	1	1
Streptomyces	Streptomyces sp. NBC_01185	NBC_01185	1	6
Streptomyces	Streptomyces chartreusis	GCF_036010565.1	1	4
Streptomyces	Streptomyces sp. NBC_01077	NBC_01077	3	3
Streptomyces	Streptomyces noursei ATCC 11455	GCF_001704275.1	1	3
Streptomyces	Streptomyces formicae	GCF_022647665.1	2	2
Streptomyces	Streptomyces anulatus	NBC_00501	1	2
Streptomyces	Streptomyces anulatus	NBC_01516	1	2
Streptomyces	Streptomyces anulatus	NBC_01626	1	2
Streptomyces	Streptomyces anulatus	NBC_01641	1	2
Streptomyces	Streptomyces canus	NBC_00001	1	2
Streptomyces	Streptomyces chartreusis	GCF_036345055.1	1	2
Streptomyces	Streptomyces harbinensis	GCF_013364095.1	1	2
Streptomyces	Streptomyces libani subsp. libani	GCF_027497475.1	1	2
Streptomyces	Streptomyces liliifuscus	GCF_016598615.1	1	2
Streptomyces	Streptomyces marincola	GCF_002128305.1	1	2
Streptomyces	Streptomyces microflavus	GCF_013364315.1	1	2
Streptomyces	Streptomyces microflavus	GCF_036010585.1	1	2
Streptomyces	Streptomyces sp. 135	GCF_020026305.1	1	2
Streptomyces	Streptomyces sp. BB1-1-1	GCF_031597775.1	1	2
Streptomyces	Streptomyces sp. FIT100	GCF_024584805.1	1	2
Streptomyces	Streptomyces sp. ITFR-21	GCF_031844685.1	1	2
Streptomyces	Streptomyces sp. JB150	GCF_011193355.1	1	2
Streptomyces	Streptomyces sp. KN37	GCF_034057835.1	1	2
Streptomyces	Streptomyces sp. NBC_00035	NBC_00035	1	2
Streptomyces	Streptomyces sp. NBC_00829	NBC_00829	1	2
Streptomyces	Streptomyces sp. NBC_00872	NBC_00872	1	2
Streptomyces	Streptomyces sp. NBC_01304	GCF_035975855.1	1	2
Streptomyces	Streptomyces sp. NBC_01420	NBC_01420	1	2
Streptomyces	Streptomyces sp. NBC_01803	GCF_035917415.1	1	2
Streptomyces	Streptomyces sp. QH1-20	GCF_041283565.1	1	2
Streptomyces	Streptomyces sp. SGAir0957	GCF_043523415.1	1	2
Streptomyces	Streptomyces sp. WAC 01529	GCF_003945545.1	1	2
Streptomyces	Streptomyces albidoflavus	NBC_01790	3	1
Streptomyces	Streptomyces sp. SCSIO 75703	GCF_036607905.1	3	1
Streptomyces	Streptomyces akebiae	GCF_019599145.1	2	1
Streptomyces	Streptomyces albidoflavus	GCF_036239155.1	2	1
Streptomyces	Streptomyces albidoflavus	NBC_01658	2	1
Streptomyces	Streptomyces alboniger	GCF_008704395.1	2	1
Streptomyces	Streptomyces aquilus	GCF_003955715.1	2	1
Streptomyces	Streptomyces canus	GCF_036226545.1	2	1
Streptomyces	Streptomyces canus	NBC_00002	2	1
Streptomyces	Streptomyces canus	NBC_00022	2	1
Streptomyces	Streptomyces canus	NBC_00087	2	1
Streptomyces	Streptomyces canus	NBC_00135	2	1
Streptomyces	Streptomyces canus	NBC_00349	2	1
Streptomyces	Streptomyces canus	NBC_00350	2	1
Streptomyces	Streptomyces canus	NBC_00685	2	1
Streptomyces	Streptomyces celluloflavus	GCF_035977975.1	2	1
Streptomyces	Streptomyces coelicoflavus	NBC_00099	2	1
Streptomyces	Streptomyces coeruleorubidus	GCF_033216215.1	2	1
Streptomyces	Streptomyces decoyicus	GCF_036013815.1	2	1
Streptomyces	Streptomyces europaeiscabiei	NBC_00480	2	1
Streptomyces	Streptomyces europaeiscabiei	NBC_01735	2	1
Streptomyces	Streptomyces galilaeus	GCF_008704575.1	2	1
Streptomyces	Streptomyces glauciniger	NBC_01694	2	1
Streptomyces	Streptomyces koelreuteriae	GCF_024442315.1	2	1
Streptomyces	Streptomyces lincolnensis	GCF_001685355.1	2	1
Streptomyces	Streptomyces lincolnensis	GCF_003344445.1	2	1
Streptomyces	Streptomyces luteogriseus	NBC_00711	2	1
Streptomyces	Streptomyces murinus	GCF_036346815.1	2	1
Streptomyces	Streptomyces phaeochromogenes	GCF_035918055.1	2	1
Streptomyces	Streptomyces phaeochromogenes	NBC_01409	2	1
Streptomyces	Streptomyces platensis	NBC_00999	2	1
Streptomyces	Streptomyces prunicolor	NBC_01021	2	1
Streptomyces	Streptomyces qaidamensis	GCF_001611795.1	2	1
Streptomyces	Streptomyces qinzhouensis	GCF_007856155.1	2	1
Streptomyces	Streptomyces scopuliridis	GCF_035917595.1	2	1
Streptomyces	Streptomyces sp. 769	GCF_000816025.1	2	1
Streptomyces	Streptomyces sp. A2-16	GCF_018128905.1	2	1
Streptomyces	Streptomyces sp. AM 2-1-1	GCF_029167645.1	2	1
Streptomyces	Streptomyces sp. BSE6.1	GCF_021383925.1	2	1
Streptomyces	Streptomyces sp. FXJ1.172	GCF_001636945.3	2	1
Streptomyces	Streptomyces sp. GMY02	GCF_019056675.1	2	1
Streptomyces	Streptomyces sp. HUAS CX7	GCF_030552875.1	2	1
Streptomyces	Streptomyces sp. KMM 9044	GCF_024701375.2	2	1
Streptomyces	Streptomyces sp. NBC 00096	NBC_00096	2	1
Streptomyces	Streptomyces sp. NBC 00197	NBC_00197	2	1
Streptomyces	Streptomyces sp. NBC 00519	NBC_00519	2	1
Streptomyces	Streptomyces sp. NBC 00631	NBC_00631	2	1
Streptomyces	Streptomyces sp. NBC 01589	NBC_01589	2	1
Streptomyces	Streptomyces sp. NBC 01594	NBC_01594	2	1
Streptomyces	Streptomyces sp. NBC_00015	NBC_00015	2	1
Streptomyces	Streptomyces sp. NBC_00247	GCF_036188265.1	2	1
Streptomyces	Streptomyces sp. NBC_00353	GCF_036108815.1	2	1
Streptomyces	Streptomyces sp. NBC_00366	GCF_036091755.1	2	1
Streptomyces	Streptomyces sp. NBC_00444	GCF_036014155.1	2	1
Streptomyces	Streptomyces sp. NBC_00453	GCF_036014095.1	2	1
Streptomyces	Streptomyces sp. NBC_00457	GCF_036014015.1	2	1
Streptomyces	Streptomyces sp. NBC_00461	GCF_036013935.1	2	1
Streptomyces	Streptomyces sp. NBC_00485	GCF_036013685.1	2	1
Streptomyces	Streptomyces sp. NBC_00726	NBC_00726	2	1
Streptomyces	Streptomyces sp. NBC_00727	NBC_00727	2	1
Streptomyces	Streptomyces sp. NBC_00986	NBC_00986	2	1
Streptomyces	Streptomyces sp. NBC_01092	NBC_01092	2	1
Streptomyces	Streptomyces sp. NBC_01171	NBC_01171	2	1
Streptomyces	Streptomyces sp. NBC_01259	GCF_041435395.1	2	1
Streptomyces	Streptomyces sp. NBC_01334	GCF_035983595.1	2	1
Streptomyces	Streptomyces sp. NBC_01429	GCF_036231945.1	2	1
Streptomyces	Streptomyces sp. NBC_01527	NBC_01527	2	1
Streptomyces	Streptomyces sp. NBC_01750	GCF_035918095.1	2	1
Streptomyces	Streptomyces sp. NL15-2K	GCF_030551255.1	2	1
Streptomyces	Streptomyces sp. R11	GCF_041051905.1	2	1
Streptomyces	Streptomyces xiamenensis	GCF_000993785.3	2	1
Streptomyces	Streptomyces yunnanensis	GCF_029011865.1	2	1
Streptomyces	Streptomyces zaomyceticus	GCF_035991205.1	2	1
Streptomyces	Kitasatospora papulosa	NBC_00867	1	1
Streptomyces	Streptomyces achromogenes	NBC_00156	1	1
Streptomyces	Streptomyces achromogenes	NBC_00217	1	1
Streptomyces	Streptomyces acidiscabies	GCF_036873425.1	1	1
Streptomyces	Streptomyces acidiscabies	GCF_036873705.1	1	1
Streptomyces	Streptomyces albidoflavus	GCF_000359525.1	1	1
Streptomyces	Streptomyces albidoflavus	GCF_001577385.1	1	1
Streptomyces	Streptomyces albidoflavus	GCF_019286195.1	1	1
Streptomyces	Streptomyces albidoflavus	GCF_026635925.1	1	1
Streptomyces	Streptomyces albidoflavus	GCF_030345275.1	1	1
Streptomyces	Streptomyces albidoflavus	GCF_034479045.1	1	1
Streptomyces	Streptomyces albidoflavus	GCF_035955795.1	1	1
Streptomyces	Streptomyces albidoflavus	GCF_036238395.1	1	1
Streptomyces	Streptomyces albidoflavus	GCF_036247045.1	1	1
Streptomyces	Streptomyces albidoflavus	GCF_038242915.1	1	1
Streptomyces	Streptomyces albidoflavus	GCF_038662715.1	1	1
Streptomyces	Streptomyces albidoflavus	GCF_041438585.1	1	1
Streptomyces	Streptomyces albidoflavus	GCF_041438665.1	1	1
Streptomyces	Streptomyces albidoflavus	GCF_041438825.1	1	1
Streptomyces	Streptomyces albidoflavus	GCF_041438845.1	1	1
Streptomyces	Streptomyces albidoflavus	GCF_947311705.1	1	1
Streptomyces	Streptomyces albidoflavus	NBC_01110	1	1
Streptomyces	Streptomyces albidoflavus	NBC_01170	1	1
Streptomyces	Streptomyces albidoflavus	NBC_01274	1	1
Streptomyces	Streptomyces albidoflavus	NBC_01374	1	1
Streptomyces	Streptomyces albidoflavus	NBC_01621	1	1
Streptomyces	Streptomyces albidoflavus	NBC_01627	1	1
Streptomyces	Streptomyces albidoflavus	NBC_01661	1	1
Streptomyces	Streptomyces albidoflavus	NBC_01664	1	1
Streptomyces	Streptomyces albidoflavus	NBC_01665	1	1
Streptomyces	Streptomyces albidoflavus	NBC_01671	1	1
Streptomyces	Streptomyces albidoflavus	NBC_01673	1	1
Streptomyces	Streptomyces albidoflavus	NBC_01675	1	1
Streptomyces	Streptomyces alboflavus	GCF_002189675.2	1	1
Streptomyces	Streptomyces albus	GCF_011006355.1	1	1
Streptomyces	Streptomyces albus	GCF_024752535.1	1	1
Streptomyces	Streptomyces alfalfae	GCF_001975025.1	1	1
Streptomyces	Streptomyces alfalfae	GCF_016128295.1	1	1
Streptomyces	Streptomyces alfalfae	GCF_018141485.1	1	1
Streptomyces	Streptomyces althioticus	GCF_036226965.1	1	1
Streptomyces	Streptomyces althioticus	NBC_01666	1	1
Streptomyces	Streptomyces althioticus	NBC_01672	1	1
Streptomyces	Streptomyces althioticus	NBC_01679	1	1
Streptomyces	Streptomyces ambofaciens	GCF_001632865.1	1	1
Streptomyces	Streptomyces ambofaciens ATCC 23877	GCF_001267885.1	1	1
Streptomyces	Streptomyces angustmyceticus	GCF_019933235.1	1	1
Streptomyces	Streptomyces angustmyceticus	GCF_025252265.1	1	1
Streptomyces	Streptomyces anthocyanicus	GCF_035917655.1	1	1
Streptomyces	Streptomyces anthocyanicus	GCF_036226945.1	1	1
Streptomyces	Streptomyces anthocyanicus	NBC_00116	1	1
Streptomyces	Streptomyces anthocyanicus	NBC_01372	1	1
Streptomyces	Streptomyces anthocyanicus	NBC_01636	1	1
Streptomyces	Streptomyces anthocyanicus	NBC_01662	1	1
Streptomyces	Streptomyces anthocyanicus	NBC_01668	1	1
Streptomyces	Streptomyces antibioticus	NBC_00282	1	1
Streptomyces	Streptomyces antibioticus	NBC_01273	1	1
Streptomyces	Streptomyces antimycoticus	GCF_030291795.1	1	1
Streptomyces	Streptomyces antimycoticus	NBC_00836	1	1
Streptomyces	Streptomyces antimycoticus	NBC_00839	1	1
Streptomyces	Streptomyces anulatus	GCF_001434355.1	1	1
Streptomyces	Streptomyces anulatus	GCF_019378935.1	1	1
Streptomyces	Streptomyces anulatus	GCF_020783455.1	1	1
Streptomyces	Streptomyces anulatus	GCF_035917915.1	1	1
Streptomyces	Streptomyces anulatus	GCF_035954115.1	1	1
Streptomyces	Streptomyces anulatus	GCF_036010525.1	1	1
Streptomyces	Streptomyces anulatus	GCF_036206925.1	1	1
Streptomyces	Streptomyces anulatus	GCF_036227625.1	1	1
Streptomyces	Streptomyces anulatus	GCF_036232045.1	1	1
Streptomyces	Streptomyces anulatus	GCF_036346555.1	1	1
Streptomyces	Streptomyces anulatus	GCF_036346915.1	1	1
Streptomyces	Streptomyces anulatus	NBC_00990	1	1
Streptomyces	Streptomyces anulatus	NBC_01010	1	1
Streptomyces	Streptomyces anulatus	NBC_01069	1	1
Streptomyces	Streptomyces anulatus	NBC_01080	1	1
Streptomyces	Streptomyces anulatus	NBC_01106	1	1
Streptomyces	Streptomyces anulatus	NBC_01134	1	1
Streptomyces	Streptomyces anulatus	NBC_01414	1	1
Streptomyces	Streptomyces anulatus	NBC_01417	1	1
Streptomyces	Streptomyces anulatus	NBC_01418	1	1
Streptomyces	Streptomyces anulatus	NBC_01419	1	1
Streptomyces	Streptomyces anulatus	NBC_01522	1	1
Streptomyces	Streptomyces anulatus	NBC_01523	1	1
Streptomyces	Streptomyces anulatus	NBC_01543	1	1
Streptomyces	Streptomyces anulatus	NBC_01556	1	1
Streptomyces	Streptomyces anulatus	NBC_01576	1	1
Streptomyces	Streptomyces anulatus	NBC_01582	1	1
Streptomyces	Streptomyces anulatus	NBC_01598	1	1
Streptomyces	Streptomyces anulatus	NBC_01625	1	1
Streptomyces	Streptomyces anulatus	NBC_01651	1	1
Streptomyces	Streptomyces anulatus	NBC_01654	1	1
Streptomyces	Streptomyces armeniacus	GCF_003355155.1	1	1
Streptomyces	Streptomyces atratus	GCF_003330865.1	1	1
Streptomyces	Streptomyces atratus	GCF_034300035.1	1	1
Streptomyces	Streptomyces atratus	NBC_00041	1	1
Streptomyces	Streptomyces atratus	NBC_00043	1	1
Streptomyces	Streptomyces atratus	NBC_01545	1	1
Streptomyces	Streptomyces aurantiacus	GCF_014701115.1	1	1
Streptomyces	Streptomyces avermitilis MA-4680 = NBRC 14893	GCF_000009765.2	1	1
Streptomyces	Streptomyces avidinii	NBC_00832	1	1
Streptomyces	Streptomyces avidinii	NBC_01157	1	1
Streptomyces	Streptomyces bacillaris	GCF_003268675.1	1	1
Streptomyces	Streptomyces bathyalis	GCF_015910445.1	1	1
Streptomyces	Streptomyces bobili	GCF_036172715.1	1	1
Streptomyces	Streptomyces bobili	GCF_041051855.1	1	1
Streptomyces	Streptomyces brevispora	GCF_035917795.1	1	1
Streptomyces	Streptomyces brevispora	GCF_036250715.1	1	1
Streptomyces	Streptomyces broussonetiae	GCF_009796285.1	1	1
Streptomyces	Streptomyces buecherae	GCF_013364335.1	1	1
Streptomyces	Streptomyces buecherae	GCF_014295035.1	1	1
Streptomyces	Streptomyces cadmiisoli	GCF_003261055.1	1	1
Streptomyces	Streptomyces californicus	GCF_016906185.1	1	1
Streptomyces	Streptomyces californicus	GCF_016906205.1	1	1
Streptomyces	Streptomyces californicus	GCF_016906265.1	1	1
Streptomyces	Streptomyces calvus	GCF_006716135.1	1	1
Streptomyces	Streptomyces camelliae	GCF_027625935.1	1	1
Streptomyces	Streptomyces caniferus	GCF_036124195.1	1	1
Streptomyces	Streptomyces caniferus	GCF_036167175.1	1	1
Streptomyces	Streptomyces caniferus	GCF_036178885.1	1	1
Streptomyces	Streptomyces caniferus	GCF_036226425.1	1	1
Streptomyces	Streptomyces caniscabiei	GCF_014852565.2	1	1
Streptomyces	Streptomyces canus	GCF_036177905.1	1	1
Streptomyces	Streptomyces canus	GCF_036237135.1	1	1
Streptomyces	Streptomyces canus	NBC_00225	1	1
Streptomyces	Streptomyces canus	NBC_00231	1	1
Streptomyces	Streptomyces canus	NBC_00632	1	1
Streptomyces	Streptomyces canus	NBC_00633	1	1
Streptomyces	Streptomyces canus	NBC_00634	1	1
Streptomyces	Streptomyces canus	NBC_00636	1	1
Streptomyces	Streptomyces canus	NBC_00866	1	1
Streptomyces	Streptomyces canus	NBC_00871	1	1
Streptomyces	Streptomyces canus	NBC_00994	1	1
Streptomyces	Streptomyces canus	NBC_01002	1	1
Streptomyces	Streptomyces canus	NBC_01370	1	1
Streptomyces	Streptomyces canus	NBC_01475	1	1
Streptomyces	Streptomyces canus	NBC_01585	1	1
Streptomyces	Streptomyces capitiformicae	GCF_002214185.1	1	1
Streptomyces	Streptomyces carpaticus	GCF_025133285.1	1	1
Streptomyces	Streptomyces castrisilvae	GCF_030719295.1	1	1
Streptomyces	Streptomyces cathayae	GCF_029760955.1	1	1
Streptomyces	Streptomyces cavourensis	GCF_002804165.1	1	1
Streptomyces	Streptomyces cavourensis	GCF_003352445.1	1	1
Streptomyces	Streptomyces cavourensis	GCF_024297125.1	1	1
Streptomyces	Streptomyces cavourensis	GCF_024365045.1	1	1
Streptomyces	Streptomyces cavourensis	GCF_026642235.1	1	1
Streptomyces	Streptomyces cellulosae	NBC_00556	1	1
Streptomyces	Streptomyces cellulosae	NBC_01607	1	1
Streptomyces	Streptomyces cellulosae	NBC_01657	1	1
Streptomyces	Streptomyces cellulosae	NBC_01667	1	1
Streptomyces	Streptomyces cellulosae	NBC_01676	1	1
Streptomyces	Streptomyces cellulosae	NBC_01677	1	1
Streptomyces	Streptomyces cellulosae	NBC_01678	1	1
Streptomyces	Streptomyces cellulosae	NBC_01680	1	1
Streptomyces	Streptomyces cellulosae	NBC_01681	1	1
Streptomyces	Streptomyces cellulosae	NBC_01701	1	1
Streptomyces	Streptomyces cellulosae	NBC_01703	1	1
Streptomyces	Streptomyces cellulosae	NBC_01706	1	1
Streptomyces	Streptomyces cellulosae	NBC_01772	1	1
Streptomyces	Streptomyces cellulosae	NBC_01773	1	1
Streptomyces	Streptomyces cellulosae	NBC_01779	1	1
Streptomyces	Streptomyces chartreusis	GCF_008704715.1	1	1
Streptomyces	Streptomyces chartreusis	GCF_013375055.1	1	1
Streptomyces	Streptomyces chartreusis	NBC_00851	1	1
Streptomyces	Streptomyces chartreusis	NBC_00865	1	1
Streptomyces	Streptomyces chromofuscus	GCF_015160875.1	1	1
Streptomyces	Streptomyces cinereoruber	GCF_009299385.1	1	1
Streptomyces	Streptomyces cinnabarinus	GCF_027270315.1	1	1
Streptomyces	Streptomyces clavifer	GCF_036345975.1	1	1
Streptomyces	Streptomyces clavifer	GCF_041431075.1	1	1
Streptomyces	Streptomyces clavuligerus	GCF_005519465.1	1	1
Streptomyces	Streptomyces clavuligerus	GCF_015767935.1	1	1
Streptomyces	Streptomyces coelicoflavus	NBC_00357	1	1
Streptomyces	Streptomyces coeruleorubidus	GCF_008705135.1	1	1
Streptomyces	Streptomyces collinus	GCF_031348265.1	1	1
Streptomyces	Streptomyces cyaneochromogenes	GCF_003963535.1	1	1
Streptomyces	Streptomyces cyaneofuscatus	GCF_033109485.1	1	1
Streptomyces	Streptomyces cyaneofuscatus	GCF_035578105.1	1	1
Streptomyces	Streptomyces cyaneofuscatus	NBC_00835	1	1
Streptomyces	Streptomyces cyaneofuscatus	NBC_01338	1	1
Streptomyces	Streptomyces cyaneofuscatus	NBC_01606	1	1
Streptomyces	Streptomyces cyaneofuscatus	NBC_01749	1	1
Streptomyces	Streptomyces cynarae	GCF_025642135.1	1	1
Streptomyces	Streptomyces dangxiongensis	GCF_003675325.1	1	1
Streptomyces	Streptomyces davaonensis JCM 4913	GCF_000349325.1	1	1
Streptomyces	Streptomyces deccanensis	GCF_022385335.1	1	1
Streptomyces	Streptomyces decoyicus	GCF_019880305.1	1	1
Streptomyces	Streptomyces decoyicus	GCF_035917695.1	1	1
Streptomyces	Streptomyces decoyicus	GCF_036237195.1	1	1
Streptomyces	Streptomyces decoyicus	NBC_01015	1	1
Streptomyces	Streptomyces decoyicus	NBC_01584	1	1
Streptomyces	Streptomyces decoyicus	NBC_01586	1	1
Streptomyces	Streptomyces dengpaensis	GCF_002946835.1	1	1
Streptomyces	Streptomyces durmitorensis	GCF_023498005.1	1	1
Streptomyces	Streptomyces erythrochromogenes	NBC_00026	1	1
Streptomyces	Streptomyces erythrochromogenes	NBC_00303	1	1
Streptomyces	Streptomyces erythrochromogenes	NBC_01127	1	1
Streptomyces	Streptomyces erythrochromogenes	NBC_01195	1	1
Streptomyces	Streptomyces europaeiscabiei	NBC_00261	1	1
Streptomyces	Streptomyces europaeiscabiei	NBC_00363	1	1
Streptomyces	Streptomyces europaeiscabiei	NBC_00494	1	1
Streptomyces	Streptomyces europaeiscabiei	NBC_00497	1	1
Streptomyces	Streptomyces europaeiscabiei	NBC_00514	1	1
Streptomyces	Streptomyces exfoliatus	NBC_00077	1	1
Streptomyces	Streptomyces fagopyri	GCF_009498275.1	1	1
Streptomyces	Streptomyces ferrugineus	GCF_015160855.1	1	1
Streptomyces	Streptomyces fimicarius	NBC_01018	1	1
Streptomyces	Streptomyces fodineus	GCF_001735805.1	1	1
Streptomyces	Streptomyces fradiae	GCF_023376055.1	1	1
Streptomyces	Streptomyces fradiae	GCF_032932555.1	1	1
Streptomyces	Streptomyces fradiae	GCF_041937565.1	1	1
Streptomyces	Streptomyces fradiae ATCC 10745 = DSM 40063	GCF_008704425.1	1	1
Streptomyces	Streptomyces gancidicus	NBC_00238	1	1
Streptomyces	Streptomyces gardneri	GCF_015710995.1	1	1
Streptomyces	Streptomyces genisteinicus	GCF_014489615.1	1	1
Streptomyces	Streptomyces glauciniger	NBC_00165	1	1
Streptomyces	Streptomyces glauciniger	NBC_01581	1	1
Streptomyces	Streptomyces glauciniger	NBC_01746	1	1
Streptomyces	Streptomyces globisporus	GCF_003147545.1	1	1
Streptomyces	Streptomyces globisporus	GCF_035919765.1	1	1
Streptomyces	Streptomyces globisporus	GCF_036010305.1	1	1
Streptomyces	Streptomyces globisporus	NBC_01004	1	1
Streptomyces	Streptomyces globisporus	NBC_01078	1	1
Streptomyces	Streptomyces globisporus C-1027	GCF_000261345.2	1	1
Streptomyces	Streptomyces glycanivorans	GCF_030719215.1	1	1
Streptomyces	Streptomyces gobiensis	GCF_021216675.1	1	1
Streptomyces	Streptomyces goshikiensis	GCF_027942015.1	1	1
Streptomyces	Streptomyces goshikiensis	GCF_034568915.1	1	1
Streptomyces	Streptomyces goshikiensis	GCF_036010625.1	1	1
Streptomyces	Streptomyces goshikiensis	GCF_036175285.1	1	1
Streptomyces	Streptomyces goshikiensis	NBC_00909	1	1
Streptomyces	Streptomyces gougerotii	NBC_01103	1	1
Streptomyces	Streptomyces griseoaurantiacus	GCF_037099765.1	1	1
Streptomyces	Streptomyces griseoaurantiacus	GCF_041439005.1	1	1
Streptomyces	Streptomyces griseochromogenes	GCF_001542625.1	1	1
Streptomyces	Streptomyces griseofuscus	GCF_014673495.1	1	1
Streptomyces	Streptomyces griseorubiginosus	GCF_003595235.1	1	1
Streptomyces	Streptomyces griseorubiginosus	NBC_00586	1	1
Streptomyces	Streptomyces griseus	NBC_01630	1	1
Streptomyces	Streptomyces griseus subsp. griseus NBRC 13350	GCF_000010605.1	1	1
Streptomyces	Streptomyces halobius	GCF_023277745.1	1	1
Streptomyces	Streptomyces halstedii	NBC_00641	1	1
Streptomyces	Streptomyces halstedii	NBC_00972	1	1
Streptomyces	Streptomyces hirsutus	GCF_035918035.1	1	1
Streptomyces	Streptomyces hirsutus	NBC_01646	1	1
Streptomyces	Streptomyces huasconensis	GCF_021028635.1	1	1
Streptomyces	Streptomyces hygroscopicus subsp. hygroscopicus	GCF_037126205.1	1	1
Streptomyces	Streptomyces iakyrus	GCF_036287475.1	1	1
Streptomyces	Streptomyces inhibens	GCF_022221585.1	1	1
Streptomyces	Streptomyces iranensis	GCF_042466515.1	1	1
Streptomyces	Streptomyces janthinus	GCF_031593255.1	1	1
Streptomyces	Streptomyces jietaisiensis	GCF_036189065.1	1	1
Streptomyces	Streptomyces jietaisiensis	GCF_036189845.1	1	1
Streptomyces	Streptomyces jietaisiensis	GCF_036190545.1	1	1
Streptomyces	Streptomyces jietaisiensis	GCF_036224405.1	1	1
Streptomyces	Streptomyces jietaisiensis	GCF_036226185.1	1	1
Streptomyces	Streptomyces jietaisiensis	GCF_036347095.1	1	1
Streptomyces	Streptomyces jietaisiensis	NBC_00023	1	1
Streptomyces	Streptomyces jietaisiensis	NBC_00616	1	1
Streptomyces	Streptomyces kanamyceticus	GCF_008704495.1	1	1
Streptomyces	Streptomyces koyangensis	GCF_003428925.1	1	1
Streptomyces	Streptomyces koyangensis	GCF_016803985.1	1	1
Streptomyces	Streptomyces lavendulae subsp. lavendulae	GCF_002803845.1	1	1
Streptomyces	Streptomyces lavendulae subsp. lavendulae	GCF_018255875.1	1	1
Streptomyces	Streptomyces leeuwenhoekii	GCF_001013905.1	1	1
Streptomyces	Streptomyces liangshanensis	GCF_011694815.1	1	1
Streptomyces	Streptomyces lienomycini	GCF_027947595.1	1	1
Streptomyces	Streptomyces longhuiensis	GCF_020616555.1	1	1
Streptomyces	Streptomyces longwoodensis	NBC_00534	1	1
Streptomyces	Streptomyces longwoodensis	NBC_00538	1	1
Streptomyces	Streptomyces longwoodensis	NBC_00540	1	1
Streptomyces	Streptomyces longwoodensis	NBC_00541	1	1
Streptomyces	Streptomyces longwoodensis	NBC_00594	1	1
Streptomyces	Streptomyces longwoodensis	NBC_00651	1	1
Streptomyces	Streptomyces longwoodensis	NBC_00731	1	1
Streptomyces	Streptomyces longwoodensis	NBC_00735	1	1
Streptomyces	Streptomyces lunaelactis	GCF_003054555.1	1	1
Streptomyces	Streptomyces luomodiensis	GCF_031679605.1	1	1
Streptomyces	Streptomyces luteireticuli	GCF_041519305.1	1	1
Streptomyces	Streptomyces lydicus	GCF_001984445.1	1	1
Streptomyces	Streptomyces lydicus	GCF_020790115.1	1	1
Streptomyces	Streptomyces lydicus	GCF_036207985.1	1	1
Streptomyces	Streptomyces malaysiensis	GCF_002591335.1	1	1
Streptomyces	Streptomyces malaysiensis	GCF_033547115.1	1	1
Streptomyces	Streptomyces marincola	GCF_020410765.1	1	1
Streptomyces	Streptomyces melanogenes	NBC_00027	1	1
Streptomyces	Streptomyces melanogenes	NBC_00668	1	1
Streptomyces	Streptomyces microflavus	GCF_035917435.1	1	1
Streptomyces	Streptomyces microflavus	GCF_036227005.1	1	1
Streptomyces	Streptomyces microflavus	GCF_036227025.1	1	1
Streptomyces	Streptomyces microflavus	GCF_036237355.1	1	1
Streptomyces	Streptomyces microflavus	NBC_01168	1	1
Streptomyces	Streptomyces microflavus	NBC_01184	1	1
Streptomyces	Streptomyces microflavus	NBC_01391	1	1
Streptomyces	Streptomyces microflavus	NBC_01595	1	1
Streptomyces	Streptomyces microflavus DSM 40593	GCF_000385945.1	1	1
Streptomyces	Streptomyces milbemycinicus	GCF_025908395.1	1	1
Streptomyces	Streptomyces mirabilis	GCF_036069355.1	1	1
Streptomyces	Streptomyces mirabilis	GCF_036073155.1	1	1
Streptomyces	Streptomyces mirabilis	GCF_036202585.1	1	1
Streptomyces	Streptomyces mirabilis	GCF_036248315.1	1	1
Streptomyces	Streptomyces mirabilis	GCF_041435415.1	1	1
Streptomyces	Streptomyces mobaraensis	GCF_020099395.1	1	1
Streptomyces	Streptomyces mobaraensis NBRC 13819 = DSM 40847	GCF_017916255.1	1	1
Streptomyces	Streptomyces murinus	GCF_016467295.1	1	1
Streptomyces	Streptomyces murinus	GCF_025231465.1	1	1
Streptomyces	Streptomyces murinus	GCF_028753175.1	1	1
Streptomyces	Streptomyces murinus	GCF_035954955.1	1	1
Streptomyces	Streptomyces netropsis	GCF_037414505.1	1	1
Streptomyces	Streptomyces nigra	GCF_003074055.1	1	1
Streptomyces	Streptomyces nigra	GCF_037413555.1	1	1
Streptomyces	Streptomyces nigra	NBC_00206	1	1
Streptomyces	Streptomyces nitrosporeus	GCF_008704555.1	1	1
Streptomyces	Streptomyces niveus	GCF_036227585.1	1	1
Streptomyces	Streptomyces niveus	GCF_036229765.1	1	1
Streptomyces	Streptomyces niveus	NBC_00843	1	1
Streptomyces	Streptomyces niveus	NBC_01507	1	1
Streptomyces	Streptomyces niveus	NBC_01536	1	1
Streptomyces	Streptomyces niveus	NBC_01542	1	1
Streptomyces	Streptomyces nodosus	GCF_008704995.1	1	1
Streptomyces	Streptomyces nojiriensis	GCF_017639205.1	1	1
Streptomyces	Streptomyces nojiriensis	GCF_036013835.1	1	1
Streptomyces	Streptomyces noursei	GCF_016917755.1	1	1
Streptomyces	Streptomyces olivaceus	GCF_015244315.1	1	1
Streptomyces	Streptomyces olivaceus	GCF_029542005.1	1	1
Streptomyces	Streptomyces paludis	GCF_003344965.1	1	1
Streptomyces	Streptomyces parvulus	GCF_001660045.1	1	1
Streptomyces	Streptomyces phaeochromogenes	GCF_035917195.1	1	1
Streptomyces	Streptomyces phaeochromogenes	GCF_035957715.1	1	1
Streptomyces	Streptomyces phaeochromogenes	GCF_036133475.1	1	1
Streptomyces	Streptomyces phaeochromogenes	NBC_00187	1	1
Streptomyces	Streptomyces phaeochromogenes	NBC_00221	1	1
Streptomyces	Streptomyces phaeochromogenes	NBC_00856	1	1
Streptomyces	Streptomyces phaeochromogenes	NBC_01011	1	1
Streptomyces	Streptomyces phaeochromogenes	NBC_01183	1	1
Streptomyces	Streptomyces phaeochromogenes	NBC_01600	1	1
Streptomyces	Streptomyces phaeolivaceus	GCF_009184865.1	1	1
Streptomyces	Streptomyces phaeoluteigriseus	GCF_023923245.1	1	1
Streptomyces	Streptomyces platensis	GCF_008704855.1	1	1
Streptomyces	Streptomyces platensis	GCF_035951655.1	1	1
Streptomyces	Streptomyces platensis	GCF_036079075.1	1	1
Streptomyces	Streptomyces platensis	GCF_036345215.1	1	1
Streptomyces	Streptomyces platensis	GCF_036347175.1	1	1
Streptomyces	Streptomyces platensis	NBC_00591	1	1
Streptomyces	Streptomyces pluripotens	GCF_000802245.2	1	1
Streptomyces	Streptomyces poriferorum	GCF_030719235.1	1	1
Streptomyces	Streptomyces poriferorum	GCF_030719255.1	1	1
Streptomyces	Streptomyces prasinus	GCF_008704445.1	1	1
Streptomyces	Streptomyces prasinus	GCF_036541045.1	1	1
Streptomyces	Streptomyces profundus	GCF_020740535.1	1	1
Streptomyces	Streptomyces pseudovenezuelae	GCF_036226705.1	1	1
Streptomyces	Streptomyces pseudovenezuelae	GCF_036226845.1	1	1
Streptomyces	Streptomyces pseudovenezuelae	GCF_036226905.1	1	1
Streptomyces	Streptomyces pseudovenezuelae	GCF_036345035.1	1	1
Streptomyces	Streptomyces purpurascens	NBC_00017	1	1
Streptomyces	Streptomyces rapamycinicus	GCF_040114435.1	1	1
Streptomyces	Streptomyces rimosus	GCF_008704655.1	1	1
Streptomyces	Streptomyces rimosus subsp. rimosus	GCF_024218735.1	1	1
Streptomyces	Streptomyces rimosus subsp. rimosus ATCC 10970	GCF_000331185.2	1	1
Streptomyces	Streptomyces rochei	GCF_030863865.1	1	1
Streptomyces	Streptomyces rochei	GCF_034422375.1	1	1
Streptomyces	Streptomyces rochei	GCF_040819605.1	1	1
Streptomyces	Streptomyces roseirectus	GCF_014489635.1	1	1
Streptomyces	Streptomyces rubiginosohelvolus	NBC_01139	1	1
Streptomyces	Streptomyces rubrogriseus	GCF_027947575.1	1	1
Streptomyces	Streptomyces scabiei 87.22	GCF_000091305.1	1	1
Streptomyces	Streptomyces sclerotialus	GCF_040907265.1	1	1
Streptomyces	Streptomyces scopuliridis	GCF_035917755.1	1	1
Streptomyces	Streptomyces seoulensis	GCF_004328625.1	1	1
Streptomyces	Streptomyces sp. 11-1-2	GCF_003595545.1	1	1
Streptomyces	Streptomyces sp. 11x1	GCF_032598905.1	1	1
Streptomyces	Streptomyces sp. 2114.2	GCF_900104935.1	1	1
Streptomyces	Streptomyces sp. 2323.1	GCF_900221035.1	1	1
Streptomyces	Streptomyces sp. 2P-4	GCF_030167965.1	1	1
Streptomyces	Streptomyces sp. 3211	GCF_002028385.1	1	1
Streptomyces	Streptomyces sp. 3214.6	GCF_900129855.1	1	1
Streptomyces	Streptomyces sp. 71268	GCF_029392895.1	1	1
Streptomyces	Streptomyces sp. 891-h	GCF_022760275.1	1	1
Streptomyces	Streptomyces sp. A1-5	GCF_021496785.1	1	1
Streptomyces	Streptomyces sp. A10(2020)	GCF_022695635.1	1	1
Streptomyces	Streptomyces sp. A144	GCF_020034615.2	1	1
Streptomyces	Streptomyces sp. ADI95-16	GCF_003721495.1	1	1
Streptomyces	Streptomyces sp. AM 3-1-1	GCF_029167585.1	1	1
Streptomyces	Streptomyces sp. AM 4-1-1	GCF_029167625.1	1	1
Streptomyces	Streptomyces sp. AM2-3-1	GCF_032229305.1	1	1
Streptomyces	Streptomyces sp. AM8-1-1	GCF_032229325.1	1	1
Streptomyces	Streptomyces sp. AMCC400023	GCF_021665875.1	1	1
Streptomyces	Streptomyces sp. AgN23	GCF_001598115.1	1	1
Streptomyces	Streptomyces sp. B21-104	GCF_036873195.1	1	1
Streptomyces	Streptomyces sp. BHT-5-2	GCF_019774615.1	1	1
Streptomyces	Streptomyces sp. BJ20	GCF_022869105.1	1	1
Streptomyces	Streptomyces sp. BPPL-273	GCF_030028615.1	1	1
Streptomyces	Streptomyces sp. BPTC-684	GCF_030028635.1	1	1
Streptomyces	Streptomyces sp. CA-210063	GCF_024612015.1	1	1
Streptomyces	Streptomyces sp. CA-256286	GCF_017358145.1	1	1
Streptomyces	Streptomyces sp. CA-278952	GCF_028747205.1	1	1
Streptomyces	Streptomyces sp. CB00271	GCF_014495705.1	1	1
Streptomyces	Streptomyces sp. CB04723	GCF_013401535.1	1	1
Streptomyces	Streptomyces sp. CB09001	GCF_003369795.1	1	1
Streptomyces	Streptomyces sp. CB09030	GCF_022827705.1	1	1
Streptomyces	Streptomyces sp. CC0208	GCF_003443735.1	1	1
Streptomyces	Streptomyces sp. CCM_MD2014	GCF_000772045.1	1	1
Streptomyces	Streptomyces sp. CFMR 7	GCF_001278095.1	1	1
Streptomyces	Streptomyces sp. CG1	GCF_041080625.1	1	1
Streptomyces	Streptomyces sp. CG4	GCF_041080655.1	1	1
Streptomyces	Streptomyces sp. CGMCC 4.1456	GCF_031767055.1	1	1
Streptomyces	Streptomyces sp. CGMCC 4.1772	GCF_035658475.1	1	1
Streptomyces	Streptomyces sp. CGMCC 4.7035	GCF_031583065.1	1	1
Streptomyces	Streptomyces sp. CL7	GCF_034054735.1	1	1
Streptomyces	Streptomyces sp. CLI2509	GCF_002288075.1	1	1
Streptomyces	Streptomyces sp. CMB-StM0423	GCF_002847285.1	1	1
Streptomyces	Streptomyces sp. CNQ-509	GCF_001011035.1	1	1
Streptomyces	Streptomyces sp. Caat 7-52	GCF_023702655.1	1	1
Streptomyces	Streptomyces sp. CdTB01	GCF_001484565.1	1	1
Streptomyces	Streptomyces sp. DG1A-41	GCF_037055355.1	1	1
Streptomyces	Streptomyces sp. DSM 40750	GCF_024612035.1	1	1
Streptomyces	Streptomyces sp. DSM 40868	GCF_011820545.1	1	1
Streptomyces	Streptomyces sp. DSS69	GCF_039636755.1	1	1
Streptomyces	Streptomyces sp. EAS-AB2608	GCF_019703895.1	1	1
Streptomyces	Streptomyces sp. EMB24	GCF_026651955.1	1	1
Streptomyces	Streptomyces sp. F41	GCF_037940185.1	1	1
Streptomyces	Streptomyces sp. FR-008	GCF_001431765.1	1	1
Streptomyces	Streptomyces sp. FXY-T5	GCF_030863945.1	1	1
Streptomyces	Streptomyces sp. FZ201	GCF_025402955.1	1	1
Streptomyces	Streptomyces sp. G7(2002)	GCF_028870195.1	1	1
Streptomyces	Streptomyces sp. GF20	GCF_009834105.1	1	1
Streptomyces	Streptomyces sp. GS7	GCF_009834125.1	1	1
Streptomyces	Streptomyces sp. Go-475	GCF_003330845.1	1	1
Streptomyces	Streptomyces sp. Go40/10	GCF_021029465.1	1	1
Streptomyces	Streptomyces sp. HF10	GCF_009834145.1	1	1
Streptomyces	Streptomyces sp. HM190	GCF_009857135.1	1	1
Streptomyces	Streptomyces sp. HNA39	GCF_023277965.1	1	1
Streptomyces	Streptomyces sp. HNM0561	GCF_021233395.1	1	1
Streptomyces	Streptomyces sp. HP-A2021	GCF_022807935.1	1	1
Streptomyces	Streptomyces sp. HSG2	GCF_016598575.1	1	1
Streptomyces	Streptomyces sp. HU2014	GCF_023330645.1	1	1
Streptomyces	Streptomyces sp. HUAS 15-9	GCF_025642155.1	1	1
Streptomyces	Streptomyces sp. HUAS 31	GCF_028198125.1	1	1
Streptomyces	Streptomyces sp. HUAS CB01	GCF_030406905.1	1	1
Streptomyces	Streptomyces sp. HUAS MG91	GCF_040529335.1	1	1
Streptomyces	Streptomyces sp. HUAS YS2	GCF_033343995.1	1	1
Streptomyces	Streptomyces sp. HUAS ZL42	GCF_040782645.1	1	1
Streptomyces	Streptomyces sp. ICC4	GCF_003287915.1	1	1
Streptomyces	Streptomyces sp. ID38640	GCF_011290345.1	1	1
Streptomyces	Streptomyces sp. INR7	GCF_014217585.1	1	1
Streptomyces	Streptomyces sp. ITFR-16	GCF_031844705.1	1	1
Streptomyces	Streptomyces sp. ITFR-6	GCF_031844725.1	1	1
Streptomyces	Streptomyces sp. JL1001	GCF_040571425.1	1	1
Streptomyces	Streptomyces sp. JUS-F4	GCF_030506235.1	1	1
Streptomyces	Streptomyces sp. Je 1-332	GCF_040730185.1	1	1
Streptomyces	Streptomyces sp. Je 1-369	GCF_026810505.1	1	1
Streptomyces	Streptomyces sp. Je 1-4 4N24	GCF_026239515.1	1	1
Streptomyces	Streptomyces sp. KPB2	GCF_003950055.1	1	1
Streptomyces	Streptomyces sp. KY70	GCF_904440635.1	1	1
Streptomyces	Streptomyces sp. LBUM 1475	GCF_017933255.1	1	1
Streptomyces	Streptomyces sp. LBUM 1480	GCF_017933235.1	1	1
Streptomyces	Streptomyces sp. LBUM 1482	GCF_017933115.1	1	1
Streptomyces	Streptomyces sp. LRE541	GCF_023273835.1	1	1
Streptomyces	Streptomyces sp. LX-29	GCF_029541745.1	1	1
Streptomyces	Streptomyces sp. Li-HN-5-11	GCF_032105745.1	1	1
Streptomyces	Streptomyces sp. M2	GCF_004104505.1	1	1
Streptomyces	Streptomyces sp. M54	GCF_017311125.1	1	1
Streptomyces	Streptomyces sp. M56	GCF_002812405.1	1	1
Streptomyces	Streptomyces sp. M92	GCF_028473745.1	1	1
Streptomyces	Streptomyces sp. MBT27	GCF_011751035.2	1	1
Streptomyces	Streptomyces sp. MH191	GCF_021442415.2	1	1
Streptomyces	Streptomyces sp. MMBL 11-1	GCF_028622875.1	1	1
Streptomyces	Streptomyces sp. MOE7	GCF_002090335.1	1	1
Streptomyces	Streptomyces sp. MST-110588	GCF_022695595.1	1	1
Streptomyces	Streptomyces sp. MUM 178J	GCF_022414575.2	1	1
Streptomyces	Streptomyces sp. Mg1	GCF_000412265.2	1	1
Streptomyces	Streptomyces sp. N50	GCF_033335955.1	1	1
Streptomyces	Streptomyces sp. NA02536	GCF_013364175.1	1	1
Streptomyces	Streptomyces sp. NA02950	GCF_013364155.1	1	1
Streptomyces	Streptomyces sp. NA03103	GCF_013364375.1	1	1
Streptomyces	Streptomyces sp. NA04227	GCF_013364195.1	1	1
Streptomyces	Streptomyces sp. NA07423	GCF_030122705.1	1	1
Streptomyces	Streptomyces sp. NA13	GCF_026626005.1	1	1
Streptomyces	Streptomyces sp. NBC 00009	NBC_00009	1	1
Streptomyces	Streptomyces sp. NBC 00012	NBC_00012	1	1
Streptomyces	Streptomyces sp. NBC 00016	NBC_00016	1	1
Streptomyces	Streptomyces sp. NBC 00019	NBC_00019	1	1
Streptomyces	Streptomyces sp. NBC 00028	NBC_00028	1	1
Streptomyces	Streptomyces sp. NBC 00045	NBC_00045	1	1
Streptomyces	Streptomyces sp. NBC 00046	NBC_00046	1	1
Streptomyces	Streptomyces sp. NBC 00048	NBC_00048	1	1
Streptomyces	Streptomyces sp. NBC 00055	NBC_00055	1	1
Streptomyces	Streptomyces sp. NBC 00056	NBC_00056	1	1
Streptomyces	Streptomyces sp. NBC 00057	NBC_00057	1	1
Streptomyces	Streptomyces sp. NBC 00069	NBC_00069	1	1
Streptomyces	Streptomyces sp. NBC 00073	NBC_00073	1	1
Streptomyces	Streptomyces sp. NBC 00075	NBC_00075	1	1
Streptomyces	Streptomyces sp. NBC 00076	NBC_00076	1	1
Streptomyces	Streptomyces sp. NBC 00079	NBC_00079	1	1
Streptomyces	Streptomyces sp. NBC 00080	NBC_00080	1	1
Streptomyces	Streptomyces sp. NBC 00081	NBC_00081	1	1
Streptomyces	Streptomyces sp. NBC 00093	NBC_00093	1	1
Streptomyces	Streptomyces sp. NBC 00101	NBC_00101	1	1
Streptomyces	Streptomyces sp. NBC 00110	NBC_00110	1	1
Streptomyces	Streptomyces sp. NBC 00111	NBC_00111	1	1
Streptomyces	Streptomyces sp. NBC 00114	NBC_00114	1	1
Streptomyces	Streptomyces sp. NBC 00117	NBC_00117	1	1
Streptomyces	Streptomyces sp. NBC 00118	NBC_00118	1	1
Streptomyces	Streptomyces sp. NBC 00119	NBC_00119	1	1
Streptomyces	Streptomyces sp. NBC 00134	NBC_00134	1	1
Streptomyces	Streptomyces sp. NBC 00144	NBC_00144	1	1
Streptomyces	Streptomyces sp. NBC 00147	NBC_00147	1	1
Streptomyces	Streptomyces sp. NBC 00191	NBC_00191	1	1
Streptomyces	Streptomyces sp. NBC 00203	NBC_00203	1	1
Streptomyces	Streptomyces sp. NBC 00209	NBC_00209	1	1
Streptomyces	Streptomyces sp. NBC 00211	NBC_00211	1	1
Streptomyces	Streptomyces sp. NBC 00212	NBC_00212	1	1
Streptomyces	Streptomyces sp. NBC 00433	NBC_00433	1	1
Streptomyces	Streptomyces sp. NBC 00499	NBC_00499	1	1
Streptomyces	Streptomyces sp. NBC 00510	NBC_00510	1	1
Streptomyces	Streptomyces sp. NBC 00623	NBC_00623	1	1
Streptomyces	Streptomyces sp. NBC 00624	NBC_00624	1	1
Streptomyces	Streptomyces sp. NBC 00645	NBC_00645	1	1
Streptomyces	Streptomyces sp. NBC 00647	NBC_00647	1	1
Streptomyces	Streptomyces sp. NBC 00648	NBC_00648	1	1
Streptomyces	Streptomyces sp. NBC 00649	NBC_00649	1	1
Streptomyces	Streptomyces sp. NBC 00658	NBC_00658	1	1
Streptomyces	Streptomyces sp. NBC 00669	NBC_00669	1	1
Streptomyces	Streptomyces sp. NBC 00715	NBC_00715	1	1
Streptomyces	Streptomyces sp. NBC 00830	NBC_00830	1	1
Streptomyces	Streptomyces sp. NBC 00842	NBC_00842	1	1
Streptomyces	Streptomyces sp. NBC 00846	NBC_00846	1	1
Streptomyces	Streptomyces sp. NBC 00857	NBC_00857	1	1
Streptomyces	Streptomyces sp. NBC 00873	NBC_00873	1	1
Streptomyces	Streptomyces sp. NBC 00876	NBC_00876	1	1
Streptomyces	Streptomyces sp. NBC 00879	NBC_00879	1	1
Streptomyces	Streptomyces sp. NBC 00882	NBC_00882	1	1
Streptomyces	Streptomyces sp. NBC 00885	NBC_00885	1	1
Streptomyces	Streptomyces sp. NBC 00886	NBC_00886	1	1
Streptomyces	Streptomyces sp. NBC 00887	NBC_00887	1	1
Streptomyces	Streptomyces sp. NBC 00899	NBC_00899	1	1
Streptomyces	Streptomyces sp. NBC 01007	NBC_01007	1	1
Streptomyces	Streptomyces sp. NBC 01477	NBC_01477	1	1
Streptomyces	Streptomyces sp. NBC 01544	NBC_01544	1	1
Streptomyces	Streptomyces sp. NBC 01546	NBC_01546	1	1
Streptomyces	Streptomyces sp. NBC 01547	NBC_01547	1	1
Streptomyces	Streptomyces sp. NBC 01550	NBC_01550	1	1
Streptomyces	Streptomyces sp. NBC 01553	NBC_01553	1	1
Streptomyces	Streptomyces sp. NBC 01562	NBC_01562	1	1
Streptomyces	Streptomyces sp. NBC 01563	NBC_01563	1	1
Streptomyces	Streptomyces sp. NBC 01568	NBC_01568	1	1
Streptomyces	Streptomyces sp. NBC 01578	NBC_01578	1	1
Streptomyces	Streptomyces sp. NBC 01579	NBC_01579	1	1
Streptomyces	Streptomyces sp. NBC 01590	NBC_01590	1	1
Streptomyces	Streptomyces sp. NBC 01597	NBC_01597	1	1
Streptomyces	Streptomyces sp. NBC 01602	NBC_01602	1	1
Streptomyces	Streptomyces sp. NBC 01604	NBC_01604	1	1
Streptomyces	Streptomyces sp. NBC 01612	NBC_01612	1	1
Streptomyces	Streptomyces sp. NBC 01613	NBC_01613	1	1
Streptomyces	Streptomyces sp. NBC 01614	NBC_01614	1	1
Streptomyces	Streptomyces sp. NBC 01615	NBC_01615	1	1
Streptomyces	Streptomyces sp. NBC 01617	NBC_01617	1	1
Streptomyces	Streptomyces sp. NBC 01618	NBC_01618	1	1
Streptomyces	Streptomyces sp. NBC 01620	NBC_01620	1	1
Streptomyces	Streptomyces sp. NBC 01622	NBC_01622	1	1
Streptomyces	Streptomyces sp. NBC 01635	NBC_01635	1	1
Streptomyces	Streptomyces sp. NBC 01637	NBC_01637	1	1
Streptomyces	Streptomyces sp. NBC 01643	NBC_01643	1	1
Streptomyces	Streptomyces sp. NBC 01744	NBC_01744	1	1
Streptomyces	Streptomyces sp. NBC 01794	NBC_01794	1	1
Streptomyces	Streptomyces sp. NBC 01799	NBC_01799	1	1
Streptomyces	Streptomyces sp. NBC_00003	NBC_00003	1	1
Streptomyces	Streptomyces sp. NBC_00005	NBC_00005	1	1
Streptomyces	Streptomyces sp. NBC_00008	NBC_00008	1	1
Streptomyces	Streptomyces sp. NBC_00024	NBC_00024	1	1
Streptomyces	Streptomyces sp. NBC_00029	NBC_00029	1	1
Streptomyces	Streptomyces sp. NBC_00040	NBC_00040	1	1
Streptomyces	Streptomyces sp. NBC_00049	NBC_00049	1	1
Streptomyces	Streptomyces sp. NBC_00053	GCF_036010645.1	1	1
Streptomyces	Streptomyces sp. NBC_00090	NBC_00090	1	1
Streptomyces	Streptomyces sp. NBC_00104	NBC_00104	1	1
Streptomyces	Streptomyces sp. NBC_00105	NBC_00105	1	1
Streptomyces	Streptomyces sp. NBC_00122	NBC_00122	1	1
Streptomyces	Streptomyces sp. NBC_00133	NBC_00133	1	1
Streptomyces	Streptomyces sp. NBC_00145	GCF_036010605.1	1	1
Streptomyces	Streptomyces sp. NBC_00148	NBC_00148	1	1
Streptomyces	Streptomyces sp. NBC_00151	GCF_035917215.1	1	1
Streptomyces	Streptomyces sp. NBC_00158	NBC_00158	1	1
Streptomyces	Streptomyces sp. NBC_00162	GCF_024611995.1	1	1
Streptomyces	Streptomyces sp. NBC_00169	NBC_00169	1	1
Streptomyces	Streptomyces sp. NBC_00178	GCF_036206005.1	1	1
Streptomyces	Streptomyces sp. NBC_00180	NBC_00180	1	1
Streptomyces	Streptomyces sp. NBC_00184	GCF_036205185.1	1	1
Streptomyces	Streptomyces sp. NBC_00190	GCF_036203305.1	1	1
Streptomyces	Streptomyces sp. NBC_00208	GCF_036201705.1	1	1
Streptomyces	Streptomyces sp. NBC_00210	NBC_00210	1	1
Streptomyces	Streptomyces sp. NBC_00223	GCF_036199905.1	1	1
Streptomyces	Streptomyces sp. NBC_00224	GCF_041435195.1	1	1
Streptomyces	Streptomyces sp. NBC_00234	GCF_036195325.1	1	1
Streptomyces	Streptomyces sp. NBC_00236	GCF_036195045.1	1	1
Streptomyces	Streptomyces sp. NBC_00239	GCF_036194065.1	1	1
Streptomyces	Streptomyces sp. NBC_00243	GCF_035917175.1	1	1
Streptomyces	Streptomyces sp. NBC_00250	GCF_036192275.1	1	1
Streptomyces	Streptomyces sp. NBC_00252	GCF_036187565.1	1	1
Streptomyces	Streptomyces sp. NBC_00257	GCF_036183285.1	1	1
Streptomyces	Streptomyces sp. NBC_00258	GCF_036182465.1	1	1
Streptomyces	Streptomyces sp. NBC_00259	GCF_036181745.1	1	1
Streptomyces	Streptomyces sp. NBC_00269	GCF_036178905.1	1	1
Streptomyces	Streptomyces sp. NBC_00271	GCF_036178845.1	1	1
Streptomyces	Streptomyces sp. NBC_00272	GCF_036178565.1	1	1
Streptomyces	Streptomyces sp. NBC_00273	GCF_036178145.1	1	1
Streptomyces	Streptomyces sp. NBC_00280	GCF_041435135.1	1	1
Streptomyces	Streptomyces sp. NBC_00285	GCF_036174265.1	1	1
Streptomyces	Streptomyces sp. NBC_00286	GCF_036173125.1	1	1
Streptomyces	Streptomyces sp. NBC_00287	GCF_036173105.1	1	1
Streptomyces	Streptomyces sp. NBC_00289	GCF_041435115.1	1	1
Streptomyces	Streptomyces sp. NBC_00299	GCF_036173045.1	1	1
Streptomyces	Streptomyces sp. NBC_00304	GCF_036169715.1	1	1
Streptomyces	Streptomyces sp. NBC_00306	GCF_036169555.1	1	1
Streptomyces	Streptomyces sp. NBC_00310	GCF_036208085.1	1	1
Streptomyces	Streptomyces sp. NBC_00316	GCF_036158715.1	1	1
Streptomyces	Streptomyces sp. NBC_00322	GCF_036147535.1	1	1
Streptomyces	Streptomyces sp. NBC_00328	GCF_036139655.1	1	1
Streptomyces	Streptomyces sp. NBC_00334	GCF_036130235.1	1	1
Streptomyces	Streptomyces sp. NBC_00335	GCF_036127095.1	1	1
Streptomyces	Streptomyces sp. NBC_00341	GCF_041435055.1	1	1
Streptomyces	Streptomyces sp. NBC_00342	GCF_036121075.1	1	1
Streptomyces	Streptomyces sp. NBC_00343	GCF_036118775.1	1	1
Streptomyces	Streptomyces sp. NBC_00344	GCF_036088315.1	1	1
Streptomyces	Streptomyces sp. NBC_00354	GCF_036106915.1	1	1
Streptomyces	Streptomyces sp. NBC_00356	GCF_036103115.1	1	1
Streptomyces	Streptomyces sp. NBC_00358	GCF_036099295.1	1	1
Streptomyces	Streptomyces sp. NBC_00370	GCF_036084755.1	1	1
Streptomyces	Streptomyces sp. NBC_00371	GCF_036082875.1	1	1
Streptomyces	Streptomyces sp. NBC_00376	GCF_036077095.1	1	1
Streptomyces	Streptomyces sp. NBC_00377	GCF_036075115.1	1	1
Streptomyces	Streptomyces sp. NBC_00385	GCF_035917155.1	1	1
Streptomyces	Streptomyces sp. NBC_00386	GCF_036063235.1	1	1
Streptomyces	Streptomyces sp. NBC_00388	GCF_036061255.1	1	1
Streptomyces	Streptomyces sp. NBC_00390	GCF_036057275.1	1	1
Streptomyces	Streptomyces sp. NBC_00391	GCF_036055215.1	1	1
Streptomyces	Streptomyces sp. NBC_00400	GCF_036048035.1	1	1
Streptomyces	Streptomyces sp. NBC_00414	GCF_036038375.1	1	1
Streptomyces	Streptomyces sp. NBC_00425	GCF_036030735.1	1	1
Streptomyces	Streptomyces sp. NBC_00435	GCF_036014235.1	1	1
Streptomyces	Streptomyces sp. NBC_00440	GCF_036014215.1	1	1
Streptomyces	Streptomyces sp. NBC_00441	GCF_036191345.1	1	1
Streptomyces	Streptomyces sp. NBC_00442	GCF_036014195.1	1	1
Streptomyces	Streptomyces sp. NBC_00443	GCF_036014175.1	1	1
Streptomyces	Streptomyces sp. NBC_00445	GCF_036014135.1	1	1
Streptomyces	Streptomyces sp. NBC_00448	NBC_00448	1	1
Streptomyces	Streptomyces sp. NBC_00454	GCF_041434015.1	1	1
Streptomyces	Streptomyces sp. NBC_00455	GCF_036014035.1	1	1
Streptomyces	Streptomyces sp. NBC_00459	GCF_036013955.1	1	1
Streptomyces	Streptomyces sp. NBC_00464	GCF_036013915.1	1	1
Streptomyces	Streptomyces sp. NBC_00466	GCF_041433995.1	1	1
Streptomyces	Streptomyces sp. NBC_00467	GCF_036013895.1	1	1
Streptomyces	Streptomyces sp. NBC_00470	GCF_041433975.1	1	1
Streptomyces	Streptomyces sp. NBC_00481	GCF_035917135.1	1	1
Streptomyces	Streptomyces sp. NBC_00483	GCF_036013745.1	1	1
Streptomyces	Streptomyces sp. NBC_00484	GCF_036013705.1	1	1
Streptomyces	Streptomyces sp. NBC_00487	GCF_036013665.1	1	1
Streptomyces	Streptomyces sp. NBC_00490	GCF_036013645.1	1	1
Streptomyces	Streptomyces sp. NBC_00496	GCF_036013585.1	1	1
Streptomyces	Streptomyces sp. NBC_00498	GCF_036013545.1	1	1
Streptomyces	Streptomyces sp. NBC_00503	GCF_036346895.1	1	1
Streptomyces	Streptomyces sp. NBC_00513	GCF_041431415.1	1	1
Streptomyces	Streptomyces sp. NBC_00523	GCF_036346615.1	1	1
Streptomyces	Streptomyces sp. NBC_00525	GCF_036346595.1	1	1
Streptomyces	Streptomyces sp. NBC_00536	GCF_036346295.1	1	1
Streptomyces	Streptomyces sp. NBC_00539	GCF_036346105.1	1	1
Streptomyces	Streptomyces sp. NBC_00554	GCF_041431135.1	1	1
Streptomyces	Streptomyces sp. NBC_00557	GCF_036345995.1	1	1
Streptomyces	Streptomyces sp. NBC_00562	GCF_036345955.1	1	1
Streptomyces	Streptomyces sp. NBC_00564	GCF_041431115.1	1	1
Streptomyces	Streptomyces sp. NBC_00566	GCF_036345235.1	1	1
Streptomyces	Streptomyces sp. NBC_00569	GCF_036345255.1	1	1
Streptomyces	Streptomyces sp. NBC_00576	GCF_036345175.1	1	1
Streptomyces	Streptomyces sp. NBC_00582	GCF_036345155.1	1	1
Streptomyces	Streptomyces sp. NBC_00588	GCF_036345095.1	1	1
Streptomyces	Streptomyces sp. NBC_00589	GCF_036345075.1	1	1
Streptomyces	Streptomyces sp. NBC_00597	GCF_041431095.1	1	1
Streptomyces	Streptomyces sp. NBC_00637	NBC_00637	1	1
Streptomyces	Streptomyces sp. NBC_00656	NBC_00656	1	1
Streptomyces	Streptomyces sp. NBC_00659	GCF_036226925.1	1	1
Streptomyces	Streptomyces sp. NBC_00663	GCF_036226885.1	1	1
Streptomyces	Streptomyces sp. NBC_00667	GCF_036226825.1	1	1
Streptomyces	Streptomyces sp. NBC_00670	GCF_036226765.1	1	1
Streptomyces	Streptomyces sp. NBC_00683	GCF_036226745.1	1	1
Streptomyces	Streptomyces sp. NBC_00690	GCF_036226685.1	1	1
Streptomyces	Streptomyces sp. NBC_00691	GCF_036226665.1	1	1
Streptomyces	Streptomyces sp. NBC_00696	GCF_036226645.1	1	1
Streptomyces	Streptomyces sp. NBC_00704	GCF_036226605.1	1	1
Streptomyces	Streptomyces sp. NBC_00723	NBC_00723	1	1
Streptomyces	Streptomyces sp. NBC_00724	GCF_036347195.1	1	1
Streptomyces	Streptomyces sp. NBC_00728	NBC_00728	1	1
Streptomyces	Streptomyces sp. NBC_00820	GCF_036347055.1	1	1
Streptomyces	Streptomyces sp. NBC_00825	GCF_036346995.1	1	1
Streptomyces	Streptomyces sp. NBC_00827	NBC_00827	1	1
Streptomyces	Streptomyces sp. NBC_00828	NBC_00828	1	1
Streptomyces	Streptomyces sp. NBC_00838	NBC_00838	1	1
Streptomyces	Streptomyces sp. NBC_00841	GCF_035917315.1	1	1
Streptomyces	Streptomyces sp. NBC_00853	NBC_00853	1	1
Streptomyces	Streptomyces sp. NBC_00859	NBC_00859	1	1
Streptomyces	Streptomyces sp. NBC_00868	NBC_00868	1	1
Streptomyces	Streptomyces sp. NBC_00869	GCF_036346935.1	1	1
Streptomyces	Streptomyces sp. NBC_00932	NBC_00932	1	1
Streptomyces	Streptomyces sp. NBC_00963	NBC_00963	1	1
Streptomyces	Streptomyces sp. NBC_00974	NBC_00974	1	1
Streptomyces	Streptomyces sp. NBC_00984	NBC_00984	1	1
Streptomyces	Streptomyces sp. NBC_00987	NBC_00987	1	1
Streptomyces	Streptomyces sp. NBC_00988	NBC_00988	1	1
Streptomyces	Streptomyces sp. NBC_00989	NBC_00989	1	1
Streptomyces	Streptomyces sp. NBC_00995	NBC_00995	1	1
Streptomyces	Streptomyces sp. NBC_00996	NBC_00996	1	1
Streptomyces	Streptomyces sp. NBC_00998	NBC_00998	1	1
Streptomyces	Streptomyces sp. NBC_01001	NBC_01001	1	1
Streptomyces	Streptomyces sp. NBC_01003	NBC_01003	1	1
Streptomyces	Streptomyces sp. NBC_01005	NBC_01005	1	1
Streptomyces	Streptomyces sp. NBC_01006	NBC_01006	1	1
Streptomyces	Streptomyces sp. NBC_01012	NBC_01012	1	1
Streptomyces	Streptomyces sp. NBC_01013	NBC_01013	1	1
Streptomyces	Streptomyces sp. NBC_01014	NBC_01014	1	1
Streptomyces	Streptomyces sp. NBC_01017	NBC_01017	1	1
Streptomyces	Streptomyces sp. NBC_01020	NBC_01020	1	1
Streptomyces	Streptomyces sp. NBC_01022	GCF_035917295.1	1	1
Streptomyces	Streptomyces sp. NBC_01023	NBC_01023	1	1
Streptomyces	Streptomyces sp. NBC_01089	NBC_01089	1	1
Streptomyces	Streptomyces sp. NBC_01102	NBC_01102	1	1
Streptomyces	Streptomyces sp. NBC_01104	NBC_01104	1	1
Streptomyces	Streptomyces sp. NBC_01108	NBC_01108	1	1
Streptomyces	Streptomyces sp. NBC_01116	GCF_041435495.1	1	1
Streptomyces	Streptomyces sp. NBC_01124	NBC_01124	1	1
Streptomyces	Streptomyces sp. NBC_01136	NBC_01136	1	1
Streptomyces	Streptomyces sp. NBC_01166	NBC_01166	1	1
Streptomyces	Streptomyces sp. NBC_01167	NBC_01167	1	1
Streptomyces	Streptomyces sp. NBC_01174	NBC_01174	1	1
Streptomyces	Streptomyces sp. NBC_01175	NBC_01175	1	1
Streptomyces	Streptomyces sp. NBC_01176	NBC_01176	1	1
Streptomyces	Streptomyces sp. NBC_01177	NBC_01177	1	1
Streptomyces	Streptomyces sp. NBC_01178	NBC_01178	1	1
Streptomyces	Streptomyces sp. NBC_01180	NBC_01180	1	1
Streptomyces	Streptomyces sp. NBC_01186	GCF_036013045.1	1	1
Streptomyces	Streptomyces sp. NBC_01187	NBC_01187	1	1
Streptomyces	Streptomyces sp. NBC_01190	NBC_01190	1	1
Streptomyces	Streptomyces sp. NBC_01197	GCF_036010505.1	1	1
Streptomyces	Streptomyces sp. NBC_01198	NBC_01198	1	1
Streptomyces	Streptomyces sp. NBC_01201	GCF_036010445.1	1	1
Streptomyces	Streptomyces sp. NBC_01205	GCF_036010385.1	1	1
Streptomyces	Streptomyces sp. NBC_01207	GCF_036010365.1	1	1
Streptomyces	Streptomyces sp. NBC_01208	GCF_036010345.1	1	1
Streptomyces	Streptomyces sp. NBC_01210	GCF_036010325.1	1	1
Streptomyces	Streptomyces sp. NBC_01212	GCF_036010285.1	1	1
Streptomyces	Streptomyces sp. NBC_01213	GCF_041435475.1	1	1
Streptomyces	Streptomyces sp. NBC_01216	GCF_035994945.1	1	1
Streptomyces	Streptomyces sp. NBC_01217	GCF_035994185.1	1	1
Streptomyces	Streptomyces sp. NBC_01218	GCF_035993425.1	1	1
Streptomyces	Streptomyces sp. NBC_01220	GCF_041435455.1	1	1
Streptomyces	Streptomyces sp. NBC_01224	GCF_036002945.1	1	1
Streptomyces	Streptomyces sp. NBC_01230	GCF_035991645.1	1	1
Streptomyces	Streptomyces sp. NBC_01231	NBC_01231	1	1
Streptomyces	Streptomyces sp. NBC_01232	GCF_035989885.1	1	1
Streptomyces	Streptomyces sp. NBC_01233	GCF_035989305.1	1	1
Streptomyces	Streptomyces sp. NBC_01235	GCF_035989285.1	1	1
Streptomyces	Streptomyces sp. NBC_01236	GCF_035996785.1	1	1
Streptomyces	Streptomyces sp. NBC_01237	GCF_035917275.1	1	1
Streptomyces	Streptomyces sp. NBC_01240	GCF_035988865.1	1	1
Streptomyces	Streptomyces sp. NBC_01241	GCF_041435435.1	1	1
Streptomyces	Streptomyces sp. NBC_01243	GCF_035988225.1	1	1
Streptomyces	Streptomyces sp. NBC_01244	GCF_035987325.1	1	1
Streptomyces	Streptomyces sp. NBC_01255	GCF_036226445.1	1	1
Streptomyces	Streptomyces sp. NBC_01257	GCF_035917255.1	1	1
Streptomyces	Streptomyces sp. NBC_01260	GCF_036226405.1	1	1
Streptomyces	Streptomyces sp. NBC_01261	GCF_036226385.1	1	1
Streptomyces	Streptomyces sp. NBC_01262	NBC_01262	1	1
Streptomyces	Streptomyces sp. NBC_01267	GCF_036241575.1	1	1
Streptomyces	Streptomyces sp. NBC_01268	GCF_036240795.1	1	1
Streptomyces	Streptomyces sp. NBC_01276	GCF_041435355.1	1	1
Streptomyces	Streptomyces sp. NBC_01278	GCF_036237395.1	1	1
Streptomyces	Streptomyces sp. NBC_01280	GCF_036237375.1	1	1
Streptomyces	Streptomyces sp. NBC_01281	GCF_035983575.1	1	1
Streptomyces	Streptomyces sp. NBC_01283	GCF_041435335.1	1	1
Streptomyces	Streptomyces sp. NBC_01288	GCF_035982055.1	1	1
Streptomyces	Streptomyces sp. NBC_01294	GCF_035917235.1	1	1
Streptomyces	Streptomyces sp. NBC_01296	GCF_035984415.1	1	1
Streptomyces	Streptomyces sp. NBC_01298	GCF_035978755.1	1	1
Streptomyces	Streptomyces sp. NBC_01314	GCF_041435215.1	1	1
Streptomyces	Streptomyces sp. NBC_01317	GCF_035961655.1	1	1
Streptomyces	Streptomyces sp. NBC_01318	GCF_035974355.1	1	1
Streptomyces	Streptomyces sp. NBC_01320	GCF_035974375.1	1	1
Streptomyces	Streptomyces sp. NBC_01321	GCF_035974335.1	1	1
Streptomyces	Streptomyces sp. NBC_01324	GCF_035960815.1	1	1
Streptomyces	Streptomyces sp. NBC_01335	GCF_035953295.1	1	1
Streptomyces	Streptomyces sp. NBC_01336	GCF_035952475.1	1	1
Streptomyces	Streptomyces sp. NBC_01340	GCF_035949105.1	1	1
Streptomyces	Streptomyces sp. NBC_01341	GCF_035946055.1	1	1
Streptomyces	Streptomyces sp. NBC_01343	GCF_035943135.1	1	1
Streptomyces	Streptomyces sp. NBC_01351	GCF_036237315.1	1	1
Streptomyces	Streptomyces sp. NBC_01352	GCF_036237295.1	1	1
Streptomyces	Streptomyces sp. NBC_01353	GCF_036237275.1	1	1
Streptomyces	Streptomyces sp. NBC_01356	GCF_036237235.1	1	1
Streptomyces	Streptomyces sp. NBC_01358	GCF_036237215.1	1	1
Streptomyces	Streptomyces sp. NBC_01361	GCF_036250945.1	1	1
Streptomyces	Streptomyces sp. NBC_01362	GCF_036250835.1	1	1
Streptomyces	Streptomyces sp. NBC_01367	NBC_01367	1	1
Streptomyces	Streptomyces sp. NBC_01369	NBC_01369	1	1
Streptomyces	Streptomyces sp. NBC_01378	NBC_01378	1	1
Streptomyces	Streptomyces sp. NBC_01383	NBC_01383	1	1
Streptomyces	Streptomyces sp. NBC_01384	NBC_01384	1	1
Streptomyces	Streptomyces sp. NBC_01386	NBC_01386	1	1
Streptomyces	Streptomyces sp. NBC_01387	NBC_01387	1	1
Streptomyces	Streptomyces sp. NBC_01390	NBC_01390	1	1
Streptomyces	Streptomyces sp. NBC_01393	NBC_01393	1	1
Streptomyces	Streptomyces sp. NBC_01396	NBC_01396	1	1
Streptomyces	Streptomyces sp. NBC_01397	NBC_01397	1	1
Streptomyces	Streptomyces sp. NBC_01401	NBC_01401	1	1
Streptomyces	Streptomyces sp. NBC_01410	NBC_01410	1	1
Streptomyces	Streptomyces sp. NBC_01411	NBC_01411	1	1
Streptomyces	Streptomyces sp. NBC_01422	GCF_036232025.1	1	1
Streptomyces	Streptomyces sp. NBC_01423	GCF_036232005.1	1	1
Streptomyces	Streptomyces sp. NBC_01426	GCF_036231985.1	1	1
Streptomyces	Streptomyces sp. NBC_01428	GCF_036231965.1	1	1
Streptomyces	Streptomyces sp. NBC_01431	GCF_036231355.1	1	1
Streptomyces	Streptomyces sp. NBC_01435	GCF_036228565.1	1	1
Streptomyces	Streptomyces sp. NBC_01438	GCF_041438905.1	1	1
Streptomyces	Streptomyces sp. NBC_01439	GCF_036227605.1	1	1
Streptomyces	Streptomyces sp. NBC_01445	GCF_035918235.1	1	1
Streptomyces	Streptomyces sp. NBC_01450	GCF_036227505.1	1	1
Streptomyces	Streptomyces sp. NBC_01451	GCF_036227485.1	1	1
Streptomyces	Streptomyces sp. NBC_01453	GCF_036227465.1	1	1
Streptomyces	Streptomyces sp. NBC_01455	GCF_036227445.1	1	1
Streptomyces	Streptomyces sp. NBC_01456	GCF_036227425.1	1	1
Streptomyces	Streptomyces sp. NBC_01460	GCF_036227405.1	1	1
Streptomyces	Streptomyces sp. NBC_01462	GCF_036227365.1	1	1
Streptomyces	Streptomyces sp. NBC_01465	GCF_036227325.1	1	1
Streptomyces	Streptomyces sp. NBC_01471	GCF_041438865.1	1	1
Streptomyces	Streptomyces sp. NBC_01474	GCF_035918215.1	1	1
Streptomyces	Streptomyces sp. NBC_01476	GCF_036227265.1	1	1
Streptomyces	Streptomyces sp. NBC_01478	GCF_036227225.1	1	1
Streptomyces	Streptomyces sp. NBC_01483	GCF_036227165.1	1	1
Streptomyces	Streptomyces sp. NBC_01485	GCF_036227125.1	1	1
Streptomyces	Streptomyces sp. NBC_01497	GCF_036250695.1	1	1
Streptomyces	Streptomyces sp. NBC_01498	GCF_036327775.1	1	1
Streptomyces	Streptomyces sp. NBC_01506	NBC_01506	1	1
Streptomyces	Streptomyces sp. NBC_01508	NBC_01508	1	1
Streptomyces	Streptomyces sp. NBC_01511	NBC_01511	1	1
Streptomyces	Streptomyces sp. NBC_01515	NBC_01515	1	1
Streptomyces	Streptomyces sp. NBC_01520	NBC_01520	1	1
Streptomyces	Streptomyces sp. NBC_01525	NBC_01525	1	1
Streptomyces	Streptomyces sp. NBC_01530	NBC_01530	1	1
Streptomyces	Streptomyces sp. NBC_01537	NBC_01537	1	1
Streptomyces	Streptomyces sp. NBC_01538	NBC_01538	1	1
Streptomyces	Streptomyces sp. NBC_01558	GCF_035918195.1	1	1
Streptomyces	Streptomyces sp. NBC_01591	GCF_035918155.1	1	1
Streptomyces	Streptomyces sp. NBC_01592	NBC_01592	1	1
Streptomyces	Streptomyces sp. NBC_01601	GCF_036208025.1	1	1
Streptomyces	Streptomyces sp. NBC_01685	GCF_036226985.1	1	1
Streptomyces	Streptomyces sp. NBC_01693	GCF_036250635.1	1	1
Streptomyces	Streptomyces sp. NBC_01696	GCF_036250085.1	1	1
Streptomyces	Streptomyces sp. NBC_01707	GCF_041438805.1	1	1
Streptomyces	Streptomyces sp. NBC_01708	GCF_036248545.1	1	1
Streptomyces	Streptomyces sp. NBC_01715	GCF_036248295.1	1	1
Streptomyces	Streptomyces sp. NBC_01716	GCF_036248275.1	1	1
Streptomyces	Streptomyces sp. NBC_01717	GCF_036248255.1	1	1
Streptomyces	Streptomyces sp. NBC_01718	GCF_041438725.1	1	1
Streptomyces	Streptomyces sp. NBC_01723	GCF_036246005.1	1	1
Streptomyces	Streptomyces sp. NBC_01724	GCF_036244815.1	1	1
Streptomyces	Streptomyces sp. NBC_01725	GCF_036243895.1	1	1
Streptomyces	Streptomyces sp. NBC_01727	GCF_035920465.1	1	1
Streptomyces	Streptomyces sp. NBC_01732	GCF_041438685.1	1	1
Streptomyces	Streptomyces sp. NBC_01751	GCF_035918075.1	1	1
Streptomyces	Streptomyces sp. NBC_01754	GCF_035918015.1	1	1
Streptomyces	Streptomyces sp. NBC_01760	GCF_035917935.1	1	1
Streptomyces	Streptomyces sp. NBC_01761	GCF_035917895.1	1	1
Streptomyces	Streptomyces sp. NBC_01762	GCF_035917875.1	1	1
Streptomyces	Streptomyces sp. NBC_01763	GCF_035917855.1	1	1
Streptomyces	Streptomyces sp. NBC_01766	GCF_035917815.1	1	1
Streptomyces	Streptomyces sp. NBC_01768	GCF_035917835.1	1	1
Streptomyces	Streptomyces sp. NBC_01775	GCF_035917675.1	1	1
Streptomyces	Streptomyces sp. NBC_01788	GCF_035917575.1	1	1
Streptomyces	Streptomyces sp. NBC_01795	GCF_035917535.1	1	1
Streptomyces	Streptomyces sp. NBC_01800	GCF_035917495.1	1	1
Streptomyces	Streptomyces sp. NBC_01808	GCF_035917395.1	1	1
Streptomyces	Streptomyces sp. NBU3104	GCF_022026295.1	1	1
Streptomyces	Streptomyces sp. NEAU-S7GS2	GCF_003173275.1	1	1
Streptomyces	Streptomyces sp. NEAU-sy36	GCF_013423905.1	1	1
Streptomyces	Streptomyces sp. NHF165	GCF_009867075.1	1	1
Streptomyces	Streptomyces sp. P3	GCF_003032475.1	1	1
Streptomyces	Streptomyces sp. P8-A8	GCF_042465715.1	1	1
Streptomyces	Streptomyces sp. P9-2B-1	GCF_030406845.1	1	1
Streptomyces	Streptomyces sp. P9-2B-2	GCF_030406865.1	1	1
Streptomyces	Streptomyces sp. PAMC 26508	GCF_000364805.1	1	1
Streptomyces	Streptomyces sp. PBH53	GCF_001040905.1	1	1
Streptomyces	Streptomyces sp. PCS3-D2	GCF_000612545.2	1	1
Streptomyces	Streptomyces sp. PLM4	GCF_023168385.1	1	1
Streptomyces	Streptomyces sp. Q6	GCF_036967205.1	1	1
Streptomyces	Streptomyces sp. QHH-9511	GCF_009789635.1	1	1
Streptomyces	Streptomyces sp. R02	GCF_041051885.1	1	1
Streptomyces	Streptomyces sp. R08	GCF_041051895.1	1	1
Streptomyces	Streptomyces sp. R17	GCF_041051945.1	1	1
Streptomyces	Streptomyces sp. R21	GCF_041051975.1	1	1
Streptomyces	Streptomyces sp. R28	GCF_041052385.1	1	1
Streptomyces	Streptomyces sp. R33	GCF_041200175.1	1	1
Streptomyces	Streptomyces sp. R35	GCF_041053035.1	1	1
Streptomyces	Streptomyces sp. R39	GCF_041053045.1	1	1
Streptomyces	Streptomyces sp. R41	GCF_041053055.1	1	1
Streptomyces	Streptomyces sp. R44	GCF_041053105.1	1	1
Streptomyces	Streptomyces sp. R527F	GCF_021491675.1	1	1
Streptomyces	Streptomyces sp. RLB1-8	GCF_007113405.2	1	1
Streptomyces	Streptomyces sp. RLB3-17	GCF_007113425.2	1	1
Streptomyces	Streptomyces sp. RLB3-6	GCF_007113545.2	1	1
Streptomyces	Streptomyces sp. RPA4-2	GCF_012273515.2	1	1
Streptomyces	Streptomyces sp. RPA4-5	GCF_012273495.1	1	1
Streptomyces	Streptomyces sp. RTd22	GCF_001650215.1	1	1
Streptomyces	Streptomyces sp. Rer75	GCF_013414305.1	1	1
Streptomyces	Streptomyces sp. RerS4	GCF_023515955.1	1	1
Streptomyces	Streptomyces sp. S063	GCF_002832675.1	1	1
Streptomyces	Streptomyces sp. S1A1-7	GCF_007113565.2	1	1
Streptomyces	Streptomyces sp. S1A1-8	GCF_007113505.2	1	1
Streptomyces	Streptomyces sp. S1D4-20	GCF_007113585.2	1	1
Streptomyces	Streptomyces sp. S1D4-23	GCF_007113485.2	1	1
Streptomyces	Streptomyces sp. S4.7	GCF_010384365.1	1	1
Streptomyces	Streptomyces sp. S465	GCF_026898115.1	1	1
Streptomyces	Streptomyces sp. S501	GCF_004524875.1	1	1
Streptomyces	Streptomyces sp. S584	GCF_034668605.1	1	1
Streptomyces	Streptomyces sp. S8	GCF_002094995.1	1	1
Streptomyces	Streptomyces sp. SAT1	GCF_001654495.1	1	1
Streptomyces	Streptomyces sp. SCSIO 30461	GCF_037023745.1	1	1
Streptomyces	Streptomyces sp. SCSIO ZS0520	GCF_025643355.1	1	1
Streptomyces	Streptomyces sp. SCUT-3	GCF_014083985.1	1	1
Streptomyces	Streptomyces sp. SGAir0924	GCF_005490965.1	1	1
Streptomyces	Streptomyces sp. SH5	GCF_029906565.1	1	1
Streptomyces	Streptomyces sp. SJL17-4	GCF_036826855.1	1	1
Streptomyces	Streptomyces sp. SM17	GCF_002910725.2	1	1
Streptomyces	Streptomyces sp. SM18	GCF_002910775.2	1	1
Streptomyces	Streptomyces sp. SNU607	GCF_030544505.1	1	1
Streptomyces	Streptomyces sp. SS162	GCF_036485475.1	1	1
Streptomyces	Streptomyces sp. SS52	GCF_004795715.1	1	1
Streptomyces	Streptomyces sp. SS7	GCF_037993025.1	1	1
Streptomyces	Streptomyces sp. ST1015	GCF_003268535.2	1	1
Streptomyces	Streptomyces sp. SUK 48	GCF_009650765.1	1	1
Streptomyces	Streptomyces sp. SYP-A7193	GCF_009495655.1	1	1
Streptomyces	Streptomyces sp. Sge12	GCF_002080455.1	1	1
Streptomyces	Streptomyces sp. SirexAA-E	GCF_000177195.2	1	1
Streptomyces	Streptomyces sp. SudanB135_2055	GCF_964272505.1	1	1
Streptomyces	Streptomyces sp. SudanB5_2050	GCF_964272335.1	1	1
Streptomyces	Streptomyces sp. SudanB91_2054	GCF_964272455.1	1	1
Streptomyces	Streptomyces sp. T12	GCF_028736035.1	1	1
Streptomyces	Streptomyces sp. TG1A-60	GCF_037201975.1	1	1
Streptomyces	Streptomyces sp. TN58	GCF_001941845.1	1	1
Streptomyces	Streptomyces sp. Tu 2975	GCF_009832925.1	1	1
Streptomyces	Streptomyces sp. Tu6071	GCF_000213055.1	1	1
Streptomyces	Streptomyces sp. Tue 6075	GCF_001931635.1	1	1
Streptomyces	Streptomyces sp. VB1	GCF_026153095.1	1	1
Streptomyces	Streptomyces sp. VN1	GCF_011650445.1	1	1
Streptomyces	Streptomyces sp. VNUA116	GCF_030520245.1	1	1
Streptomyces	Streptomyces sp. VNUA24	GCF_029167005.1	1	1
Streptomyces	Streptomyces sp. VNUA74	GCF_030930975.1	1	1
Streptomyces	Streptomyces sp. W1SF4	GCF_003950035.1	1	1
Streptomyces	Streptomyces sp. WA6-1-16	GCF_020341595.1	1	1
Streptomyces	Streptomyces sp. WAC 01438	GCF_003945525.1	1	1
Streptomyces	Streptomyces sp. WAC 06738	GCF_003945505.1	1	1
Streptomyces	Streptomyces sp. WAC00288	GCF_002943895.1	1	1
Streptomyces	Streptomyces sp. WMMC500	GCF_027497195.1	1	1
Streptomyces	Streptomyces sp. WP-1	GCF_030450125.1	1	1
Streptomyces	Streptomyces sp. WY228	GCF_019287315.1	1	1
Streptomyces	Streptomyces sp. WZ-12	GCF_028898845.1	1	1
Streptomyces	Streptomyces sp. XC 2026	GCF_016605905.1	1	1
Streptomyces	Streptomyces sp. XD-27	GCF_030553055.1	1	1
Streptomyces	Streptomyces sp. Y1	GCF_041053115.1	1	1
Streptomyces	Streptomyces sp. YH02	GCF_043996095.1	1	1
Streptomyces	Streptomyces sp. YIM 121038	GCF_006088715.1	1	1
Streptomyces	Streptomyces sp. YPW6	GCF_018866325.1	1	1
Streptomyces	Streptomyces sp. Z423-1	GCF_013009255.1	1	1
Streptomyces	Streptomyces sp. cg2	GCF_041080665.1	1	1
Streptomyces	Streptomyces sp. cg36	GCF_041080675.1	1	1
Streptomyces	Streptomyces sp. endophyte_N2	GCF_004104485.1	1	1
Streptomyces	Streptomyces sp. f51	GCF_037940415.1	1	1
Streptomyces	Streptomyces sp. fd1-xmd	GCF_002007685.1	1	1
Streptomyces	Streptomyces spectabilis	GCF_008704795.1	1	1
Streptomyces	Streptomyces spongiicola	GCF_003122365.1	1	1
Streptomyces	Streptomyces subrutilus	GCF_008704535.1	1	1
Streptomyces	Streptomyces subrutilus	GCF_035959875.1	1	1
Streptomyces	Streptomyces tanashiensis	GCF_026427415.1	1	1
Streptomyces	Streptomyces tauricus	GCF_036204065.1	1	1
Streptomyces	Streptomyces thermoviolaceus	NBC_01629	1	1
Streptomyces	Streptomyces tirandamycinicus	GCF_003097515.1	1	1
Streptomyces	Streptomyces tubbatahanensis	GCF_022699385.1	1	1
Streptomyces	Streptomyces tubercidicus	GCF_027497495.1	1	1
Streptomyces	Streptomyces tubercidicus	GCF_035979555.1	1	1
Streptomyces	Streptomyces tubercidicus	GCF_036013785.1	1	1
Streptomyces	Streptomyces tubercidicus	GCF_041434035.1	1	1
Streptomyces	Streptomyces tubercidicus	NBC_00625	1	1
Streptomyces	Streptomyces tubercidicus	NBC_00975	1	1
Streptomyces	Streptomyces tuirus	GCF_014701095.1	1	1
Streptomyces	Streptomyces uncialis	NBC_01135	1	1
Streptomyces	Streptomyces uncialis	NBC_01365	1	1
Streptomyces	Streptomyces uncialis	NBC_01379	1	1
Streptomyces	Streptomyces uncialis	NBC_01624	1	1
Streptomyces	Streptomyces venezuelae	GCF_008639045.1	1	1
Streptomyces	Streptomyces venezuelae	GCF_008705255.1	1	1
Streptomyces	Streptomyces venezuelae ATCC 10712	GCF_008639165.1	1	1
Streptomyces	Streptomyces vietnamensis	GCF_000830005.1	1	1
Streptomyces	Streptomyces vilmorinianum	GCF_005517195.1	1	1
Streptomyces	Streptomyces vinaceus	GCF_008704935.1	1	1
Streptomyces	Streptomyces violaceoruber	GCF_033406955.1	1	1
Streptomyces	Streptomyces violaceus	GCF_036014055.1	1	1
Streptomyces	Streptomyces violaceus	GCF_036014075.1	1	1
Streptomyces	Streptomyces violaceus	GCF_036226305.1	1	1
Streptomyces	Streptomyces virginiae	GCF_036870975.1	1	1
Streptomyces	Streptomyces virginiae	NBC_00125	1	1
Streptomyces	Streptomyces virginiae	NBC_00131	1	1
Streptomyces	Streptomyces virginiae	NBC_00164	1	1
Streptomyces	Streptomyces virginiae	NBC_00168	1	1
Streptomyces	Streptomyces virginiae	NBC_00179	1	1
Streptomyces	Streptomyces virginiae	NBC_00220	1	1
Streptomyces	Streptomyces virginiae	NBC_00226	1	1
Streptomyces	Streptomyces virginiae	NBC_00227	1	1
Streptomyces	Streptomyces virginiae	NBC_00276	1	1
Streptomyces	Streptomyces virginiae	NBC_00324	1	1
Streptomyces	Streptomyces virginiae	NBC_00488	1	1
Streptomyces	Streptomyces virginiae	NBC_00640	1	1
Streptomyces	Streptomyces virginiae	NBC_00701	1	1
Streptomyces	Streptomyces virginiae	NBC_00831	1	1
Streptomyces	Streptomyces virginiae	NBC_01311	1	1
Streptomyces	Streptomyces virginiae	NBC_01758	1	1
Streptomyces	Streptomyces viridosporus T7A	GCF_008704515.1	1	1
Streptomyces	Streptomyces xanthii	GCF_014621695.1	1	1
Streptomyces	Streptomyces xanthochromogenes	GCF_036541015.1	1	1
Streptomyces	Streptomyces xanthophaeus	GCF_028421465.1	1	1
Streptomyces	Streptomyces xanthophaeus	NBC_01137	1	1
Streptomyces	Streptomyces xinghaiensis	GCF_036006205.1	1	1
Streptomyces	Streptomyces xinghaiensis S187	GCF_000220705.2	1	1
Streptomyces	Streptomyces yangpuensis	GCF_024666385.1	1	1
Streptomyces	Streptomyces yatensis	GCF_018069625.1	1	1
Streptomyces	Streptomyces zaomyceticus	GCF_036035005.1	1	1
Streptomyces	Streptomyces zaomyceticus	GCF_041435155.1	1	1
Streptomyces	Streptomyces zaomyceticus	NBC_00044	1	1
Streptomyces	Streptomyces zaomyceticus	NBC_00084	1	1
Streptomyces	Streptomyces zaomyceticus	NBC_00088	1	1
Streptomyces	Streptomyces zaomyceticus	NBC_00123	1	1
Streptomyces	[Kitasatospora] papulosa	NBC_00042	1	1
Streptomyces	[Kitasatospora] papulosa	NBC_00082	1	1
Streptomyces	[Kitasatospora] papulosa	NBC_00185	1	1
Streptomyces	[Kitasatospora] papulosa	NBC_01552	1	1
Streptomyces	[Kitasatospora] papulosa	NBC_01564	1	1
Streptomyces	Streptomyces rutgersensis	GCF_014216335.1	1	0
Streptomyces	Streptomyces sp. V17-9	GCF_018310575.1	1	0
Streptomyces	Streptomyces sp.	NBC_00161	0	0

## Sheet: Table S3 Spearman codon rarity
	0	1	2	3	4	5	6	7	8	9
Actinokineospora	0.73	-0.42	-0.75	-0.75	-0.78	-0.81	-0.75	-0.54	-0.17	0.72
Amycolatopsis	0.79	-0.58	-0.78	-0.81	-0.81	-0.81	-0.82	-0.75	-0.43	0.79
Kitasatospora	0.83	-0.14	-0.58	-0.78	-0.82	-0.83	-0.81	-0.82	-0.75	0.49
Kribbella	0.77	-0.48	-0.66	-0.78	-0.76	-0.75	-0.82	-0.78	-0.34	0.57
Micromonospora	0.81	-0.46	-0.76	-0.79	-0.8	-0.8	-0.8	-0.76	-0.64	0.67
Nocardia	0.82	-0.27	-0.56	-0.67	-0.77	-0.8	-0.84	-0.8	-0.62	0.53
Pseudonocardia	0.69	-0.49	-0.57	-0.71	-0.74	-0.76	-0.69	-0.67	-0.49	0.66
Rhodococcus	0.74	-0.41	-0.54	-0.69	-0.76	-0.71	-0.81	-0.74	-0.53	0.53
Saccharopolyspora	0.84	-0.34	-0.72	-0.81	-0.85	-0.83	-0.82	-0.79	-0.59	0.62
Saccharothrix	0.81	-0.48	-0.79	-0.82	-0.84	-0.82	-0.82	-0.77	-0.57	0.69
Streptomyces	0.81	-0.12	-0.62	-0.77	-0.81	-0.81	-0.82	-0.8	-0.69	0.49

## Sheet: Table S4 Pearson codon rarity
	0	1	2	3	4	5	6	7	8	9
Actinokineospora	0.74	-0.32	-0.62	-0.65	-0.72	-0.78	-0.74	-0.56	-0.14	0.52
Amycolatopsis	0.7	-0.56	-0.7	-0.72	-0.74	-0.75	-0.74	-0.66	-0.49	0.66
Kitasatospora	0.81	0.35	-0.28	-0.66	-0.67	-0.76	-0.8	-0.86	-0.87	0.04
Kribbella	0.67	-0.4	-0.6	-0.66	-0.74	-0.76	-0.72	-0.73	-0.33	0.57
Micromonospora	0.72	-0.4	-0.57	-0.67	-0.75	-0.73	-0.73	-0.68	-0.64	0.53
Nocardia	0.77	-0.11	-0.54	-0.68	-0.72	-0.78	-0.81	-0.77	-0.62	0.51
Pseudonocardia	0.47	-0.39	-0.35	-0.51	-0.59	-0.68	-0.47	-0.45	-0.29	0.51
Rhodococcus	0.65	-0.26	-0.41	-0.65	-0.65	-0.65	-0.72	-0.66	-0.46	0.5
Saccharopolyspora	0.78	-0.18	-0.48	-0.66	-0.74	-0.79	-0.77	-0.73	-0.65	0.42
Saccharothrix	0.82	-0.24	-0.7	-0.71	-0.8	-0.8	-0.82	-0.77	-0.66	0.47
Streptomyces	0.81	0.39	-0.34	-0.6	-0.7	-0.74	-0.81	-0.83	-0.86	0.14

## Sheet: Table S5 COG TTA
COG Category	Actinokineospora	Amycolatopsis	Kitasatospora	Kribbella	Micromonospora	Nocardia	Pseudonocardia	Rhodococcus	Saccharothrix	Saccharopolyspora	Streptomyces	Average among all
Replication and repair	81.8	86.6	42.3	48.3	54.9	90.2	85.7	73.7	60	68.2	68.4	69.1
Transcription	9	43.3	40.3	22.4	39.1	68.1	0	58.6	60	9.1	57.7	37.0545
Secondary metabolite biosynthesis	72.7	18.3	9.1	6.9	10.9	54.6	14.2	46.7	46.7	18.2	24.7	29.3636
Signal transduction	36.3	11.7	14.3	24.1	38.6	43	0	44.1	40	0	45.2	27
Defense mechanisms	54.5	21.6	6.5	17.2	23.4	21.5	14.3	57.5	6.7	13.6	6.3	22.1
Cell wall/membrane/envelop, biogenesis	9	3.3	2.6	10.3	9.2	3.7	28.6	29	0	68.2	9.8	15.7909
Carbohydrate transport, and metabolism	36.3	0	7.8	1.7	0	7.4	0	0.5	6.7	0	2.8	5.74545
Cell cycle control and mitosis	0	13.3	2.6	5.2	7.1	7.3	0	1.6	0	0	8.8	4.17273
Intracellular trafficking and secretion	0	13.3	1.3	6.9	3.3	6.7	0	1.1	6.7	0	1.8	3.73636
Inorganic ion transport and metabolism	0	0	0	1.72	1.6	0.6	7.1	2.1	0	0	0	1.19273
Coenzyme metabolism	0	0	0	3.4	2.2	0	0	0	0	4.5	0	0.918182
Post-translational modification, protein turnover, chaperone functions	0	0	3.9	1.7	0.5	0	0	0	0	0	4.2	0.936364
Nucleotide metabolism and transport	0	6.7	0	0	0.5	1.8	0	0.5	0	0	0.1	0.872727
Lipid metabolism	0	1.7	0	0	0.5	0.6	0	0.5	0	0	0	0.3

## Sheet: Table S6 COG TTA bin 0
COG Category	Actinokineospora	Amycolatopsis	Kitasatospora	Kribbella	Micromonospora	Nocardia	Pseudonocardia	Rhodococcus	Saccharothrix	Saccharopolyspora	Streptomyces	Average among all
Cell wall/membrane/envelop, biogenesis	90.9	48.3	83.1	94.8	85.3	85.3	14.3	46.2	93.3	72.7	23.2	67.0364
Carbohydrate transport, and metabolism	90.9	63.3	71.4	65.5	50	60.7	0	36.6	73.3	81.8	27.6	56.4636
Post-translational modification, protein turnover, chaperone functions	81.8	65	57.1	58.6	30.1	52.8	14.3	41.9	100	68.2	21.3	53.7364
Secondary metabolite biosynthesis	72.7	38.3	74	36.2	28.8	71.2	0	68.3	100	63.6	24.8	52.5364
Inorganic ion transport and metabolism	90.9	36.7	6.5	77.6	58.7	85.3	28.6	58.1	20	77.3	14.8	50.4091
Replication, recombination, and repair	72.7	60	44.2	62.1	37.5	58.9	7.1	47.3	53.3	77.3	28	49.8545
Amino acid transport and metabolism	72.8	55	29.9	36.2	56.5	60.1	14.3	25.3	100	63.6	19.8	48.5
Defense mechanisms	63.6	51.7	42.9	53.4	34.2	40.5	14.3	58.6	93.3	40.9	21.2	46.7818
Signal transduction mechanisms	45.5	30	32.5	44.8	40.2	61.3	0	39.8	80	72.7	30.1	43.3545
Intracellular trafficking and secretion	0	53.3	6.5	100	31.5	92.6	0	66.7	66.7	13.6	8.1	39.9091
Lipid transport and metabolism	54.4	45	23.4	51.7	38	33.1	0	17.2	66.7	22.7	14.8	33.3636
Cell cycle control	9.1	21.7	15.6	86.2	23.9	42.9	0	10.8	53.3	59.1	14.3	30.6273
Coenzyme transport and metabolism	18.2	11.7	5.2	36.2	75.5	54	0	21.5	40	22.7	9.5	26.7727
Energy production and conversion	54.5	28.3	13	44.8	16.8	11	0	10.2	60	40.9	10.8	26.3909
Transcription	72.7	0	19.5	0	8.7	0	0	0	60	40.9	15.4	19.7455
Nucleotide metabolism and transport	9.1	25	14.3	25.9	8.2	31.3	7.1	14	20	22.7	10.1	17.0636
Translation, ribosomal structure and biogenesis	9.1	11.7	2.6	43.1	7.1	19.6	0	32.3	20	0	4.2	13.6091

## Sheet: Table S7 COG AGA 
COG Category	Actinokineospora	Amycolatopsis	Kitasatospora	Kribbella	Micromonospora	Nocardia	Pseudonocardia	Rhodococcus	Saccharothrix	Saccharopolyspora	Streptomyces	Average among all
Replication, recombination, and repair	9.1	8.3	97.4	86.2	67.9	89.6	85.7	94.6	86.7	86.4	94.1	73.2727
Transcription	0	0	81.8	77.6	65.8	90.2	28.6	90.3	86.7	81.2	68.1	60.9364
Cell wall/membrane/envelop, biogenesis	0	0	49.3	43.1	49.5	32.5	14.3	58.6	60	45.5	85.9	39.8818
Signal transduction mechanisms	0	0	76.6	48.3	14.1	32.5	7.1	60.2	0	45.5	82.7	33.3636
Defense mechanisms	9	5	40.2	60.3	28.8	24.5	35.7	60.2	13.3	40.1	40.3	32.4909
Secondary metabolite biosynthesis	45.5	0	9.1	8.6	28.8	66.9	7.1	42.5	0	18.2	17.5	22.2
Carbohydrate transport, and metabolism	0	0	48.1	8.6	36.4	1.8	0	4.3	33.3	13.6	69	19.5545
Cell cycle control	0	0	10.3	1.7	0.5	18.4	7.1	3.2	40	4.5	16	9.24545
Intracellular trafficking and secretion	0	0	1.3	1.7	2.2	1.84	28.6	3.2	0	4.5	1.5	4.07636
Post-translational modification, protein turnover, chaperone functions	0	0	0	8.6	0.5	0	0	0.5	0	0	13.9	2.13636
Energy production and conversion	0	0	0	0	0	0	7.1	0	0	0	0	0.645455
Inorganic ion transport and metabolism	0	0	1.3	0	0	0	0	0	0	0	0	0.118182

## Sheet: Table S8 COG AGA bin 0
COG Category	Actinokineospora	Amycolatopsis	Kitasatospora	Kribbella	Micromonospora	Nocardia	Pseudonocardia	Rhodococcus	Saccharothrix	Saccharopolyspora	Streptomyces	Average among all
Amino acid transport and metabolism	100	100	100	100	100	99.3865	100	100	100	100	100	99.9442
Carbohydrate transport, and metabolism	100	100	100	100	100	98.773	100	98.9247	100	100	100	99.7907
Cell wall/membrane/envelop, biogenesis	100	100	100	100	100	99.3865	85.7143	100	100	100	100	98.6455
Inorganic ion transport and metabolism	100	100	100	100	100	93.865	92.8571	97.3118	100	100	99.8256	98.5327
Post-translational modification, protein turnover, chaperone functions	100	100	97.4	100	99.4565	87.1166	71.4286	98.3871	100	90.9091	100	94.9725
Defense mechanisms	100	100	97.4	100	100	93.2515	64.2857	97.3118	100	90.9091	100	94.8326
Signal transduction mechanisms	100	100	100	94.8276	99.4565	91.411	57.1429	97.8495	100	95.4545	100	94.1947
Secondary metabolite biosynthesis	100	96.7	97.4	100	99.4565	100	50	100	100	90.9091	99.3897	93.9868
Nucleotide metabolism and transport	90.9	86.7	97.4	100	82.0652	100	100	90.3226	93.3333	90.9091	87.9686	92.6908
Lipid transport and metabolism	90.9	96.7	93.5	100	98.3696	99.3865	42.8571	100	100	95.4545	99.4769	92.4222
Energy production and conversion	81.8	98.3	97.4	100	83.6957	96.319	71.4286	97.3118	100	81.8182	97.646	91.429
Translation, ribosomal structure and biogenesis	81.8	95	88.3	100	76.087	100	71.4286	96.2366	86.6667	100	97.4717	90.2719
Coenzyme transport and metabolism	72.7	96.7	87	100	93.4783	98.1595	35.7143	99.4624	86.6667	100	93.9843	87.6241
Transcription	72.7	93.3	100	77.5862	98.3696	82.8221	71.4286	98.9247	80	86.3636	99.7384	87.3848
Replication, recombination, and repair	100	98.3	97.4	100	91.3043	90.7975	35.7143	93.0108	86.6667	72.7273	94.333	87.2958
Intracellular trafficking and secretion	90.9	75	87	91.3793	77.7174	59.5092	42.8571	77.4194	66.6667	63.6364	91.2816	74.8515
Cell cycle control	36.36	75	90.9	87.931	40.2174	68.7117	85.7143	75.2688	66.6667	27.2727	87.0968	67.3763

## Sheet: Table S9 BGCs TTA AGA
Genus	Percentage TTA	Percentage AGA
Actinokineospora	45.4545	81.8182
Amycolatopsis	30	50
Kitasatospora	70.1299	58.4416
Kribbella	28.0702	91.2281
Micromonospora	17.9348	34.7826
Nocardia	23.9264	28.8344
Pseudonocardia	14.2857	28.5714
Rhodococcus	23.1183	15.0538
Saccharopolyspora	18.1818	63.6364
Saccharothrix	66.6667	46.6667
Streptomyces	70.619	56.7568
Average	37.1261	50.5263
